# Supplementary material for: Mutability of mononucleotide repeats, not oxidative stress, explains the discrepancy between laboratory-accumulated mutations and the natural allele-frequency spectrum in C. elegans
Source: HighWire-hosted journal article supplement (doi:10.1101/gr.275372.121), 2021-08-17
Supplement: Supplemental_Material.pdf [file Supplemental_Material.pdf]

Supplementary Information for

**Mutability of mononucleotide repeats, not oxidative stress, explains the discrepancy between laboratory-accumulated mutations and the natural allele-frequency spectrum in *C. elegans***

Moein Rajaei<sup>1</sup>, Ayush Shekhar Saxena<sup>1</sup>, Lindsay M. Johnson<sup>1</sup>, Michael C. Snyder<sup>1</sup>, Timothy A. Crombie<sup>1,2</sup>, Robyn E. Tanny<sup>2</sup>, Erik C. Andersen<sup>2</sup>, Joanna Joyner-Matos<sup>3</sup>, and Charles F. Baer<sup>1,4</sup>

1- Department of Biology, University of Florida, Gainesville, FL USA

2- Department of Molecular Biosciences, Northwestern University, Evanston, IL USA

3- Department of Biology, Eastern Washington University, Cheney, WA USA

4- University of Florida Genetics Institute, Gainesville, FL USA

## **Table of Contents**

| <b><u>Section</u></b>                                                                                               | <b><u>Page</u></b> |
|---------------------------------------------------------------------------------------------------------------------|--------------------|
| 1. Figure S1. Spectra of private alleles and common variants.....                                                   | 3                  |
| 2. Figure S2. Spectra of segregating singleton and doubleton variants.....                                          | 4                  |
| 3. Figure S3. Parametric bootstrap distributions.....                                                               | 5                  |
| 4. Figure S4. Base-substitution spectra of a subset of N2 and PB306 MA lines and MA vs private alleles.....         | 6                  |
| 5. Figure S5. Indel spectra of a subset of N2 and PB306 MA lines and MA vs private alleles.....                     | 7                  |
| 6. Figure S6. Base-substitution spectra of mev-1, N2 and PB306 MA lines using two different mapping programs.....   | 8                  |
| 7. Figure S7. Indel spectra of mev-1, N2 and PB306 MA lines using two different mapping programs....                | 9                  |
| 8. Figure S8. Base-substitution spectra of mev-1, N2 and PB306 MA lines using two different coverage threshold..... | 10                 |
| 9. Figure S9. Base-substitution spectra of MA vs private alleles using two different coverage threshold, .....      | 11                 |
| 10. Figure S10. Indel spectra of mev-1, N2 and PB306 MA lines using two different coverage threshold .....          | 12                 |
| 11. Figure S11. Indel spectra of MA vs private alleles using two different coverage threshold.....                  | 13                 |
| 12. Figure S12. Plot of the failure to recall rates of the two simulated dummy data sets .....                      | 14                 |
| 13. Table S1_backup data.....                                                                                       | 15                 |
| 14. Table S2. Tests of fixed effects. ....                                                                          | 16                 |
| 15. Table S3. Line-specific mutation rates and coverage data.....                                                   | 18                 |
| 16. Table S4. Spreadsheet with individual nuclear mutations and genomic context data.....                           | 18                 |
| 17. Table S5. Spreadsheet with individual mtDNA mutations, heteroplasmic frequency, and context.....                | 18                 |
| 18. Table S6. Correlations between base-substitution (SNP) and indel mutation rates.....                            | 19                 |
| 19. Table S7. Correlation matrix of the six type-specific base-substitution mutation rates.....                     | 20                 |
| 20. Table S8_3 bp motif-specific mutation rates.....                                                                | 21                 |
| 21. Table S9_wild isolate variant counts.....                                                                       | 21                 |
| 22. Table S10_RIAIL genotypes.....                                                                                  | 21                 |
| <b>23. Table S11_Comparison Subset.....</b>                                                                         | <b>21</b>          |
| 24. Table S12. Size distribution of the dummy indels introduced into the reference genome.....                      | 22                 |

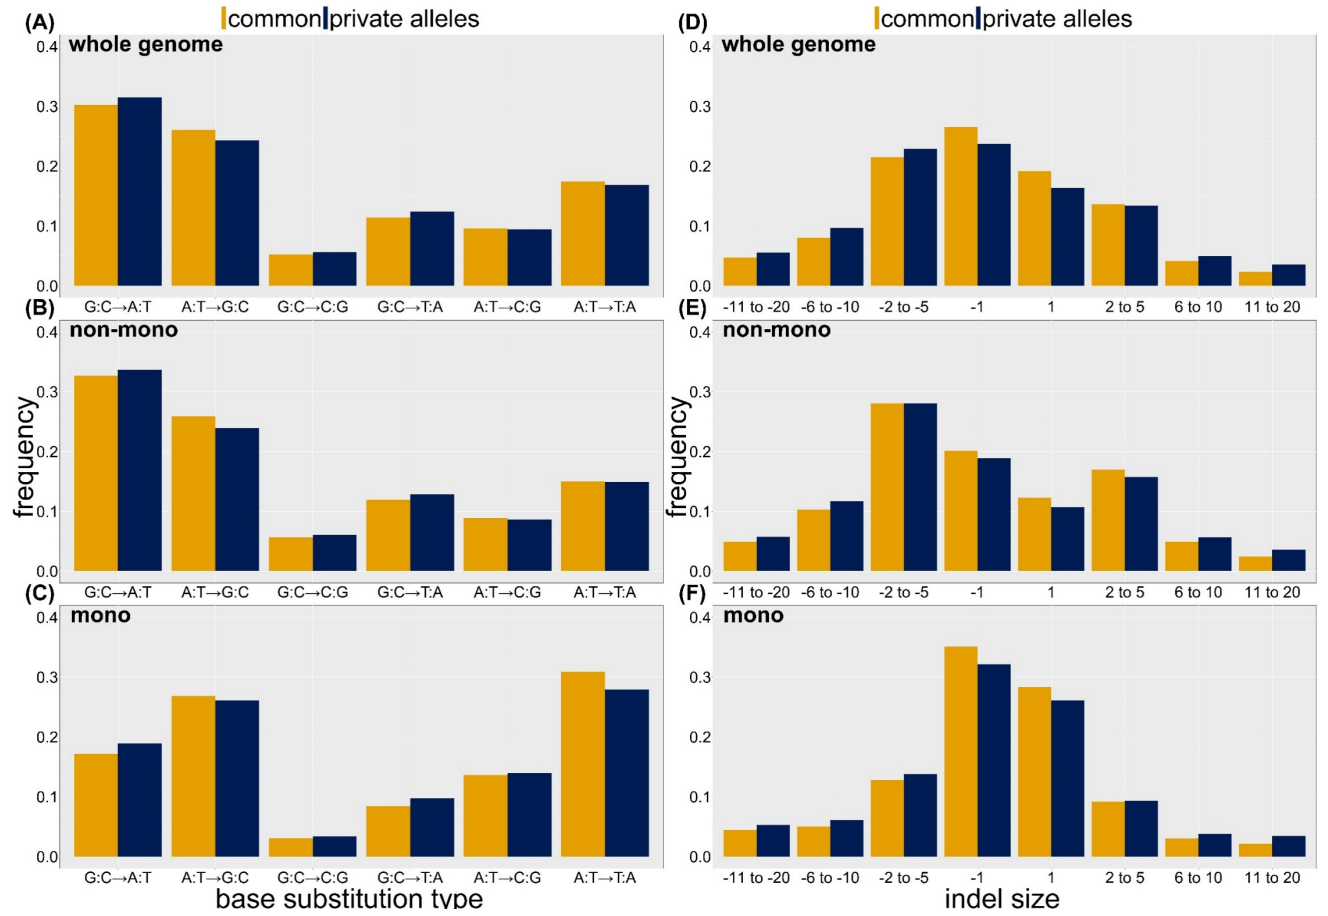

**Figure S1. Spectra of private alleles ( $n=1/N$ , blue) and common variants (orange).** Left (A-C), Base-substitution spectra. Right (D-F), Indel spectra. Top panels (A,D), whole-genome; middle panels (B,E), non-monomonucleotide sequence; bottom panels (C,F), mononucleotide sequence.

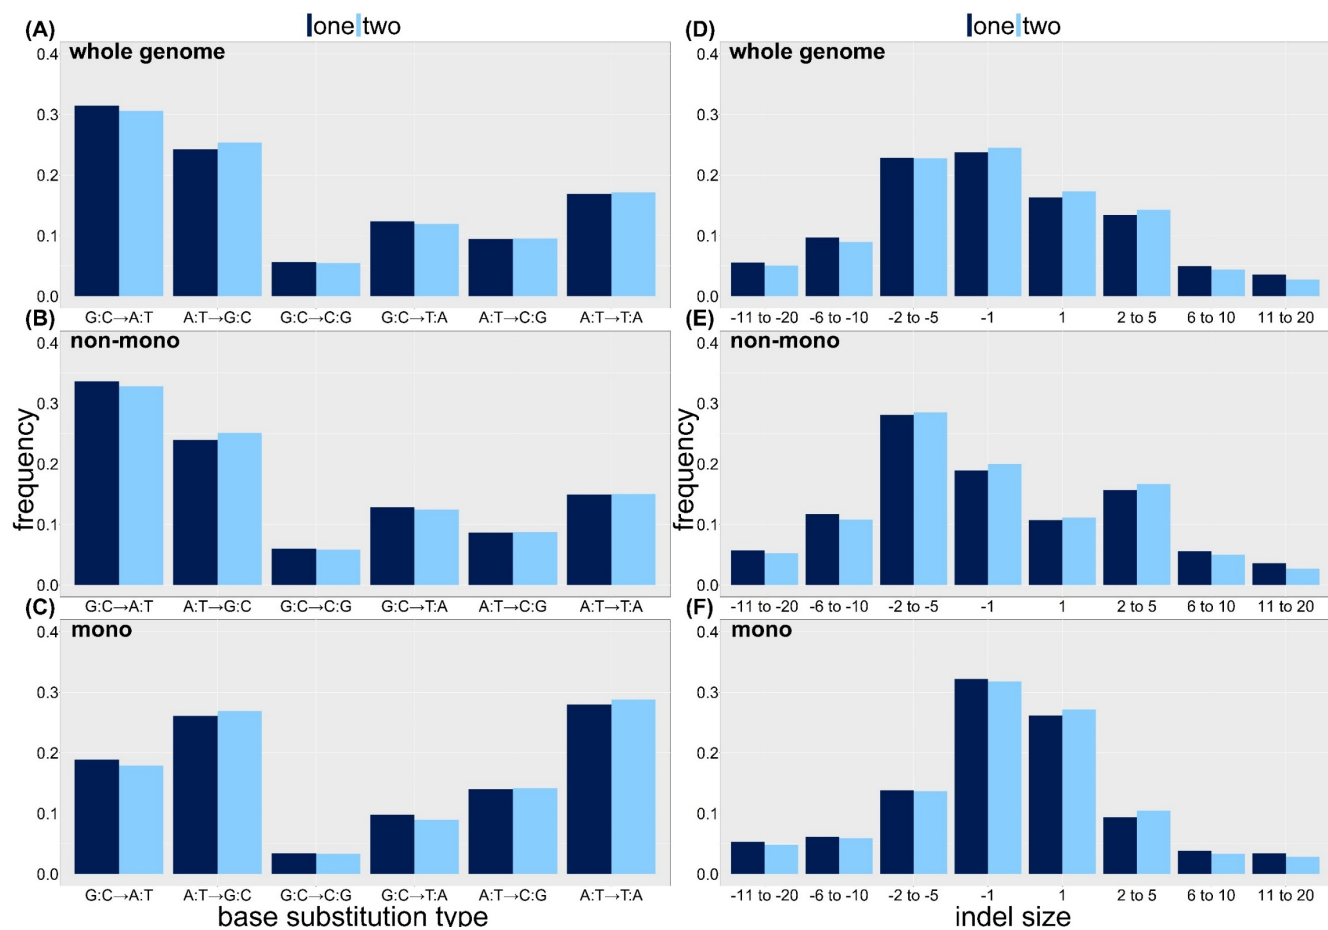

**Figure S2. Spectra of segregating singleton (dark blue,  $n=1/N$ ) and doubleton (light blue,  $n=2/N$ ) variants.** Left (A-C), base-substitution spectra. Right (D-F), indel spectra. Top panels (A,D), whole-genome; middle panels (B,E), non-monomonucleotide sequence; bottom panels (C,F), mononucleotide sequence.

**A** whole genome

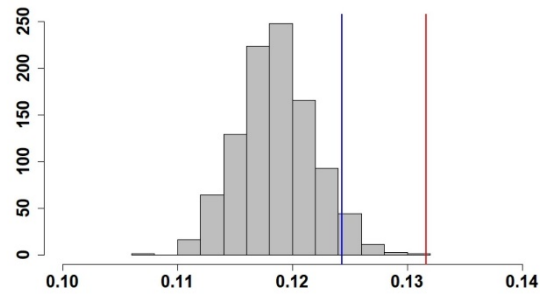

**B** non-mono

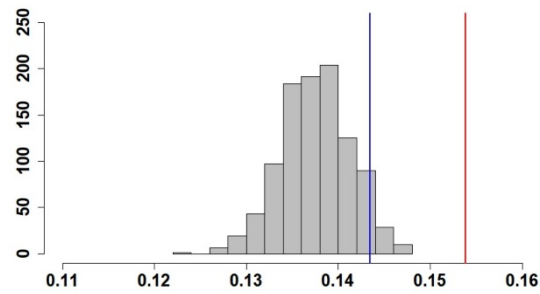

**C** mono

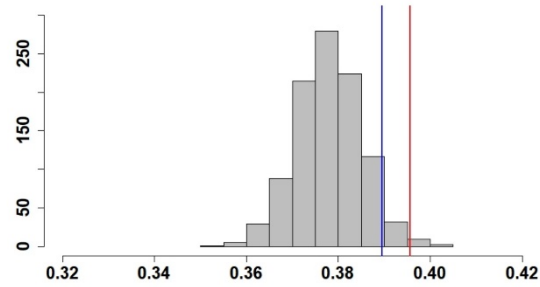

**Figure S3. Parametric bootstrap distributions.** Red lines show the observed values; blue lines show the upper 95% confidence limit of simulated D(KL).

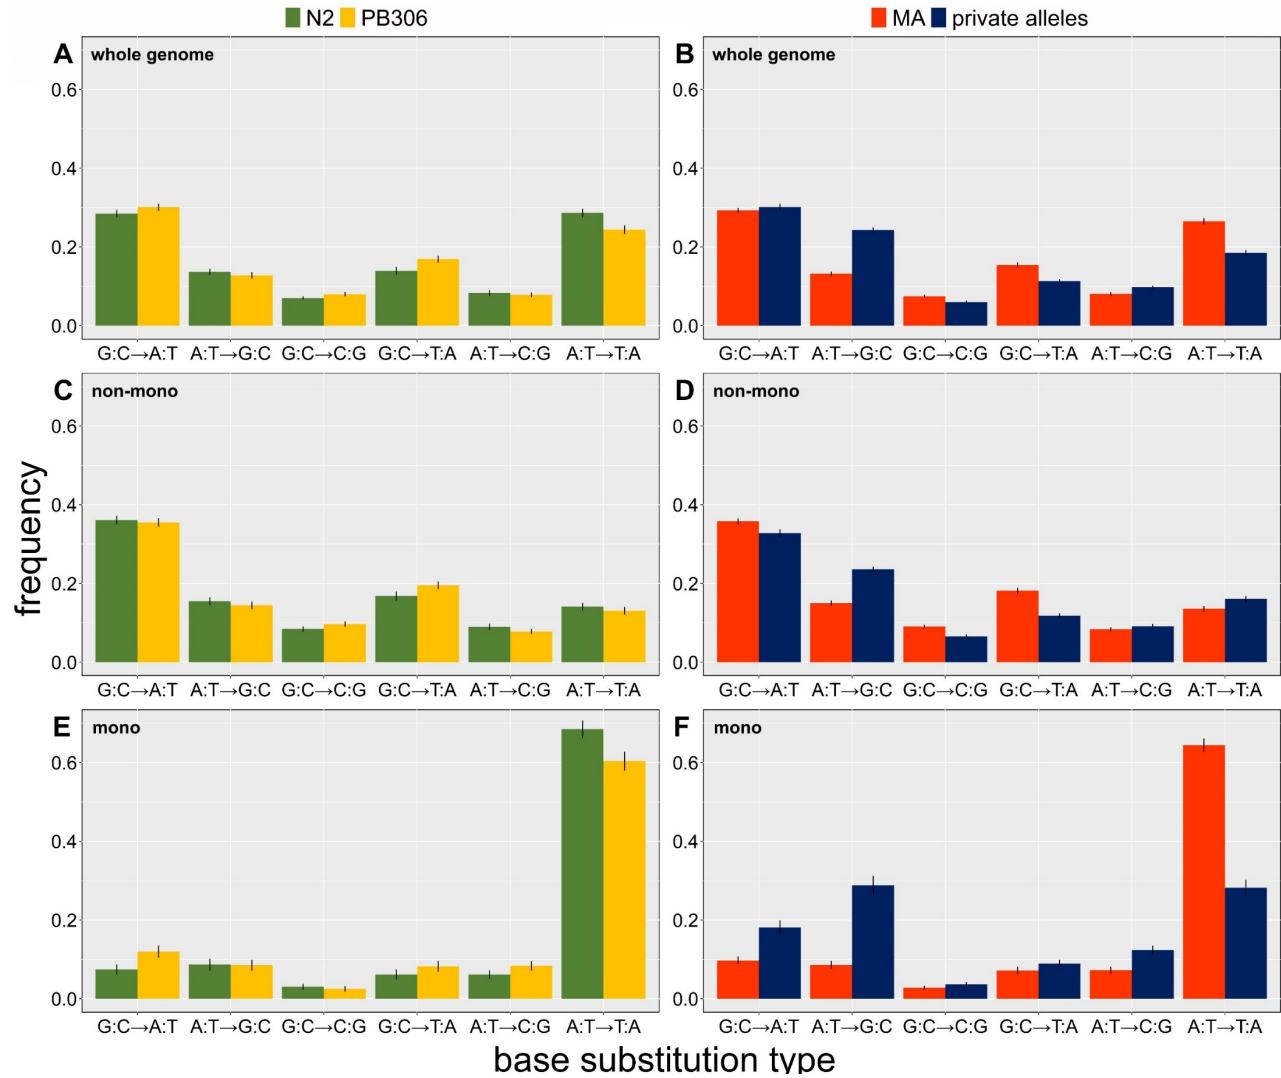

**Figure S4.** Base-substitution spectra of a subset of N2 and PB306 MA lines (left panel) and MA vs private alleles (right panel). Left panel (A,C,E), N2 (green) and PB306 (yellow); Right panel (B,D,F), wild isolate private alleles (blue) and MA means (red). Top panels (A, B) whole-genome; middle panels (C, D) non-mononucleotide sequence; bottom panels (E, F) mononucleotide sequence. Error bars show SEM. Description of the samples and the variant-calling pipelines are given in the Supplemental Materials.

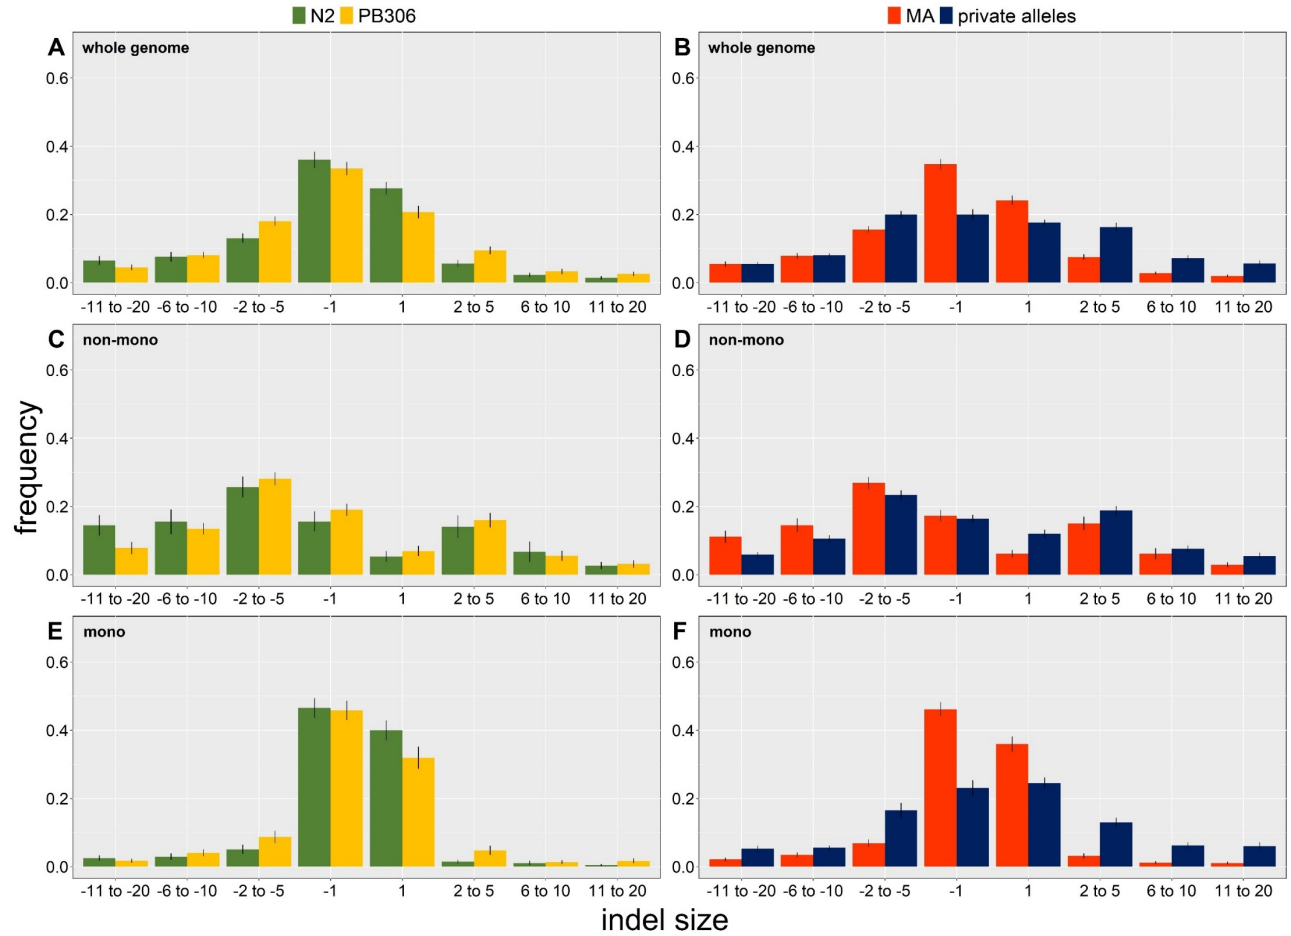

**Figure S5.** Indel spectra of a subset of N2 and PB306 MA lines (left panel) and MA vs private alleles (right panel). Left panel (A,C,E), N2 (green) and PB306 (yellow); Right panel (B,D,F), wild isolate private alleles (blue) and MA means (red). Top panels (A, B) whole-genome; middle panels (C, D) non-monomonucleotide sequence; bottom panels (E, F) mononucleotide sequence. Error bars show SEM.

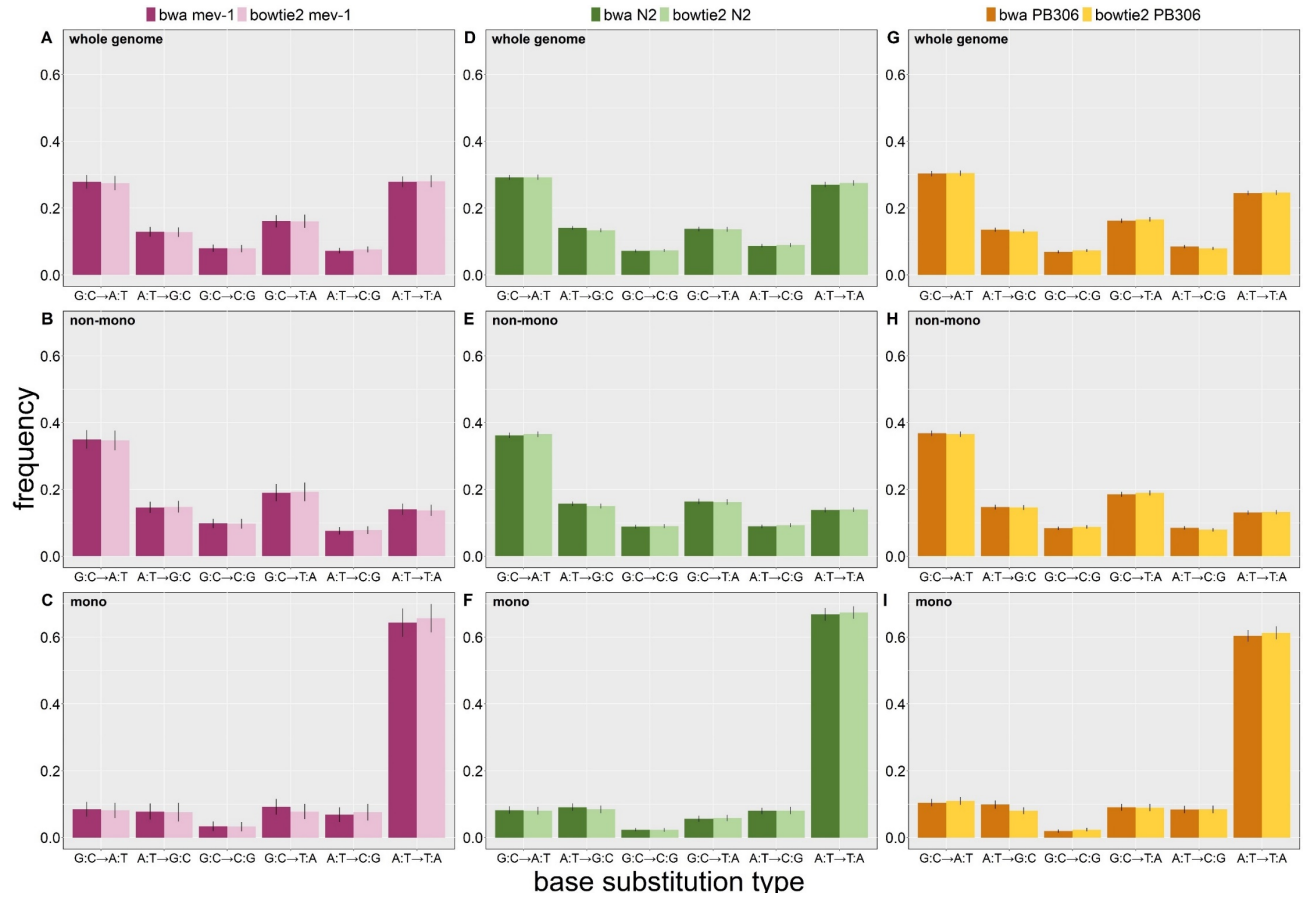

**Figure S6.** Base-substitution spectra of *mev-1*, N2 and PB306 MA lines using two different mapping programs, Bowtie2 and BWA. Left (A-C), *mev-1* MA lines. Middle (D-F) N2 MA lines. Right (G-I), PB306 MA lines. Top panels (A, D, G) whole-genome; middle panels (B, E, H) non-mononucleotide sequence; bottom panels (C, F, I) mononucleotide sequence. Error bars show SEM.



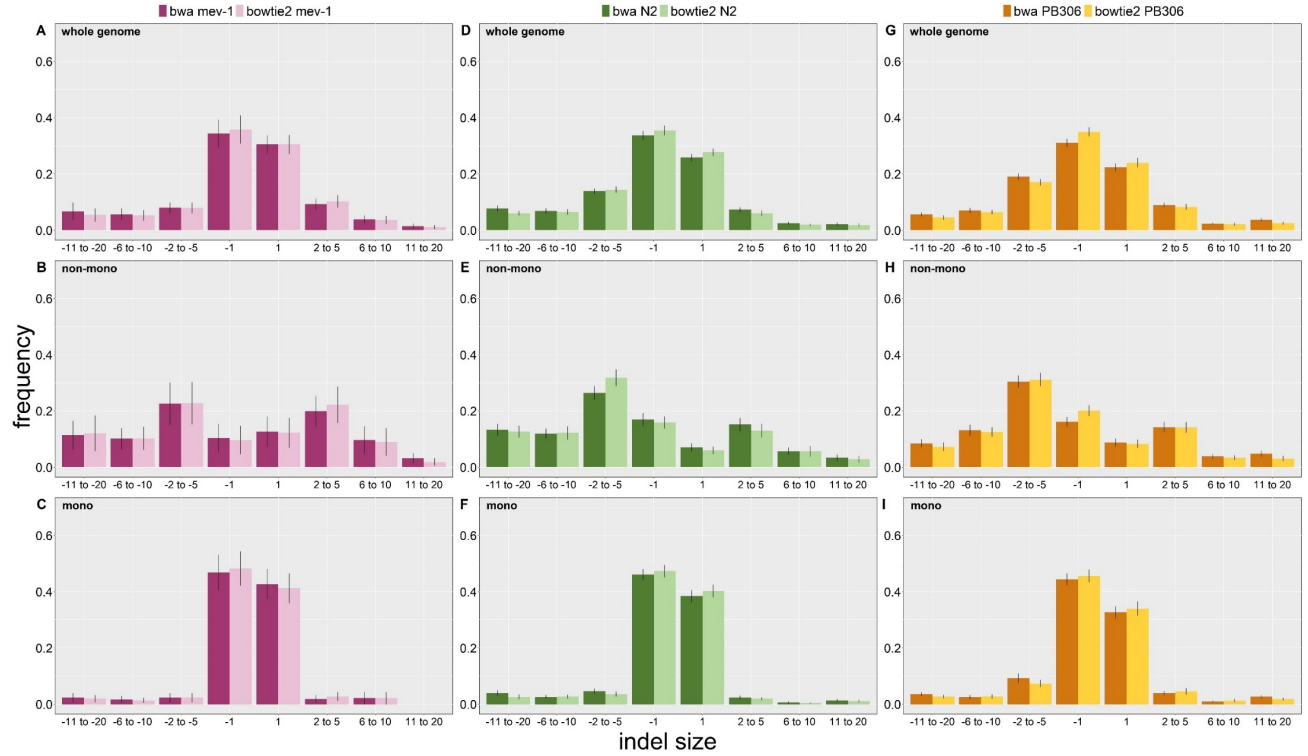

**Figure S7.** Indel spectra of *mev-1*, N2 and PB306 MA lines using two different mapping programs, Bowtie2 and BWA. Left (A-C), *mev-1* MA lines. Middle (D-F) N2 MA lines. Right (G-I), PB306 MA lines. Top panels (A, D, G) whole-genome; middle panels (B, E, H) non-monomonucleotide sequence; bottom panels (C, F, I) mononucleotide sequence. Error bars show SEM.

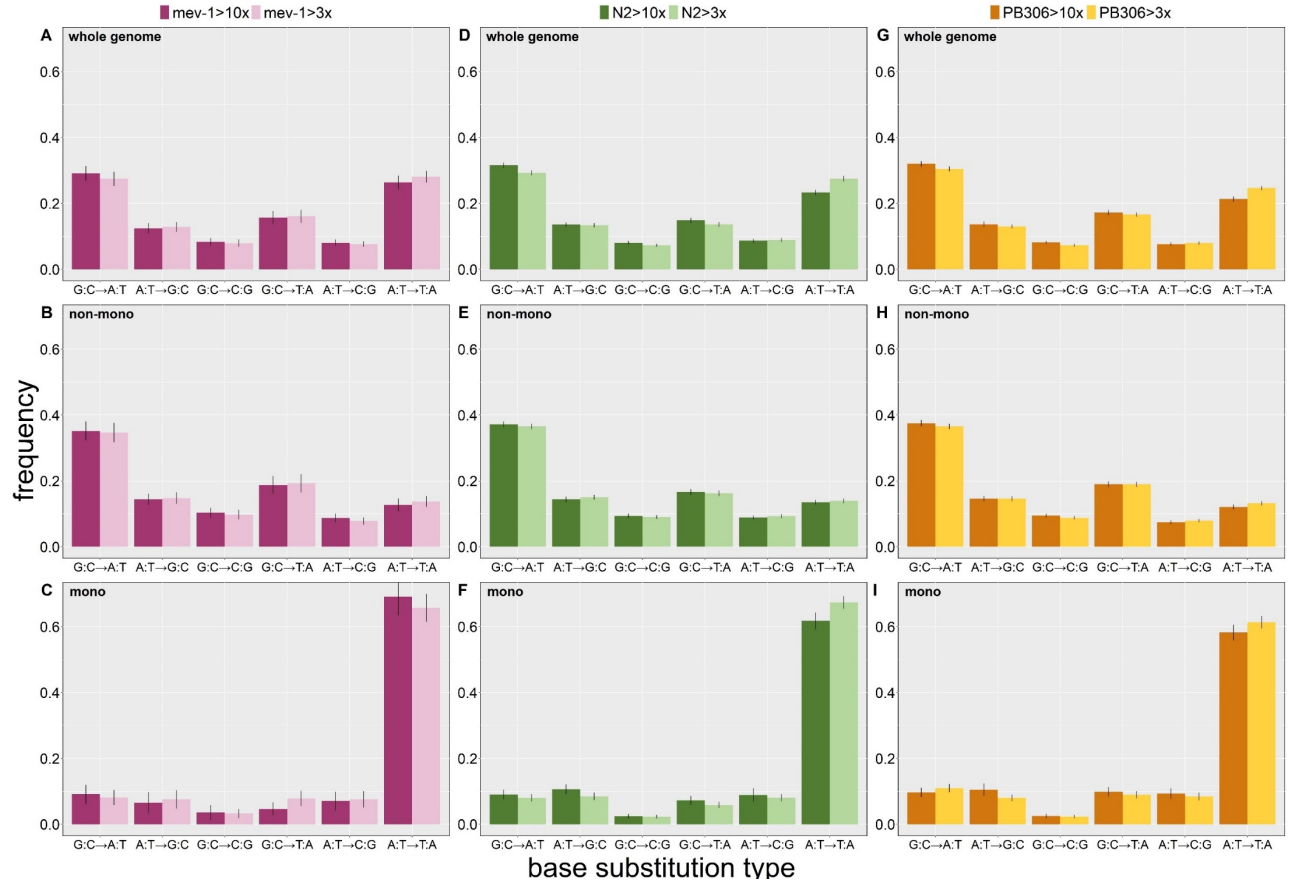

**Figure S8.** Base-substitution spectra of *mev-I*, N2 and PB306 MA lines using two different coverage threshold, 10x (dark colors) and 3x (light colors). Left (A-C), *mev-I* MA lines. Middle (D-F) N2 MA lines. Right (G-I), PB306 MA lines. Top panels (A, D, G) whole-genome; middle panels (B, E, H) non-monomonucleotide sequence; bottom panels (C, F, I) mononucleotide sequence. Error bars show SEM.

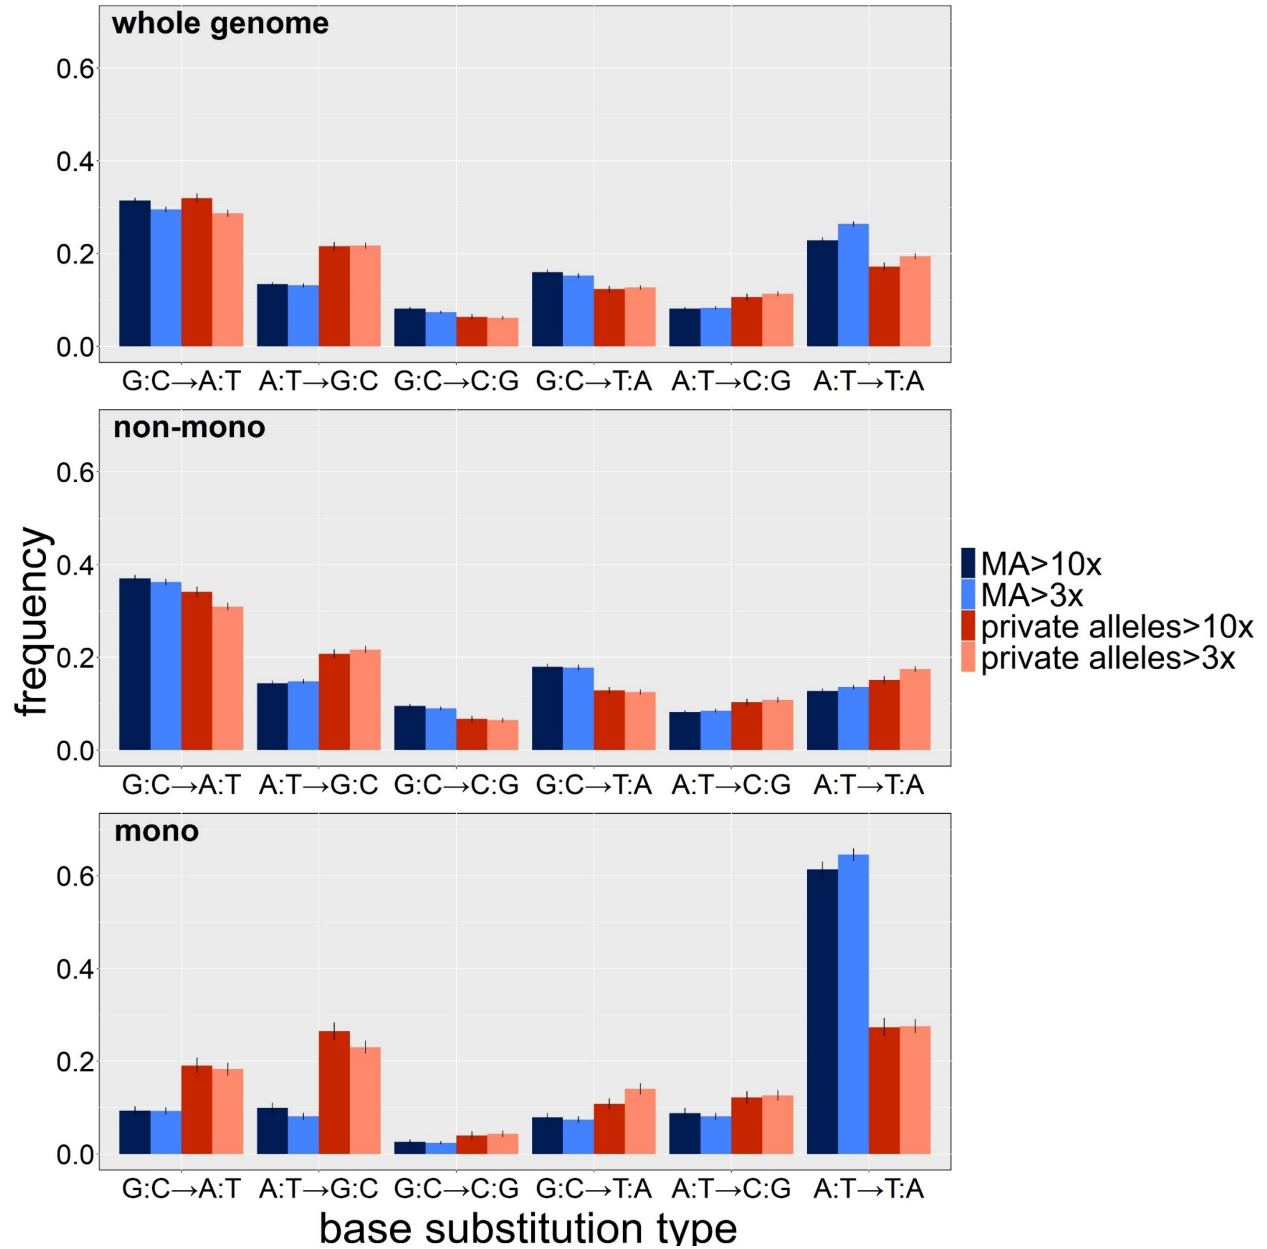

**Figure S9.** Base-substitution spectra of MA vs private alleles using two different coverage threshold, 10x (dark colors) and 3x (light colors). Top panels whole-genome; middle panels non-monomonucleotide sequence; bottom panels mononucleotide sequence. Error bars show SEM.

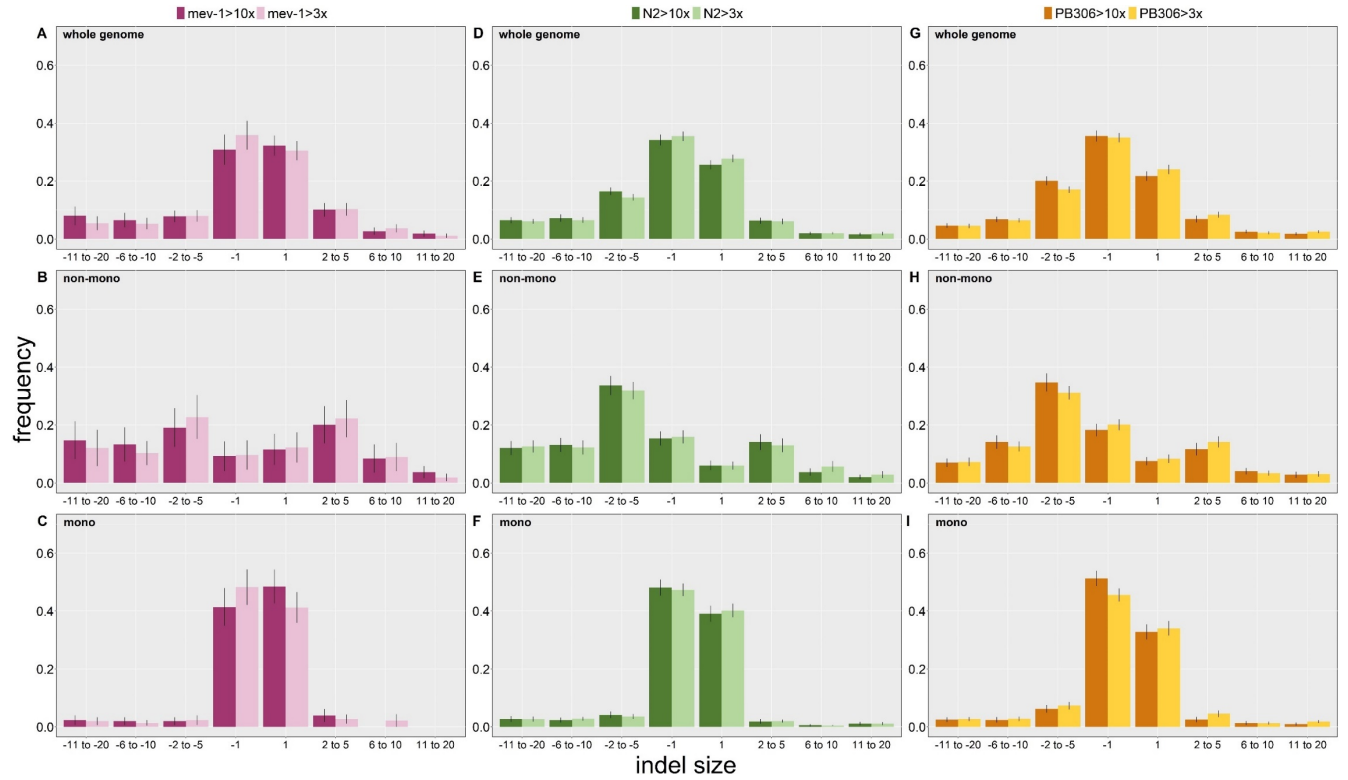

**Figure S10.** Indel spectra of *mev-1*, N2 and PB306 MA lines using two different coverage threshold, 10x (dark colors) and 3x (light colors). Left (A-C), *mev-1* MA lines. Middle (D-F) N2 MA lines. Right (G-I), PB306 MA lines. Top panels (A, D, G) whole-genome; middle panels (B, E, H) non-monomonucleotide sequence; bottom panels (C, F, I) mononucleotide sequence. Error bars show SEM.

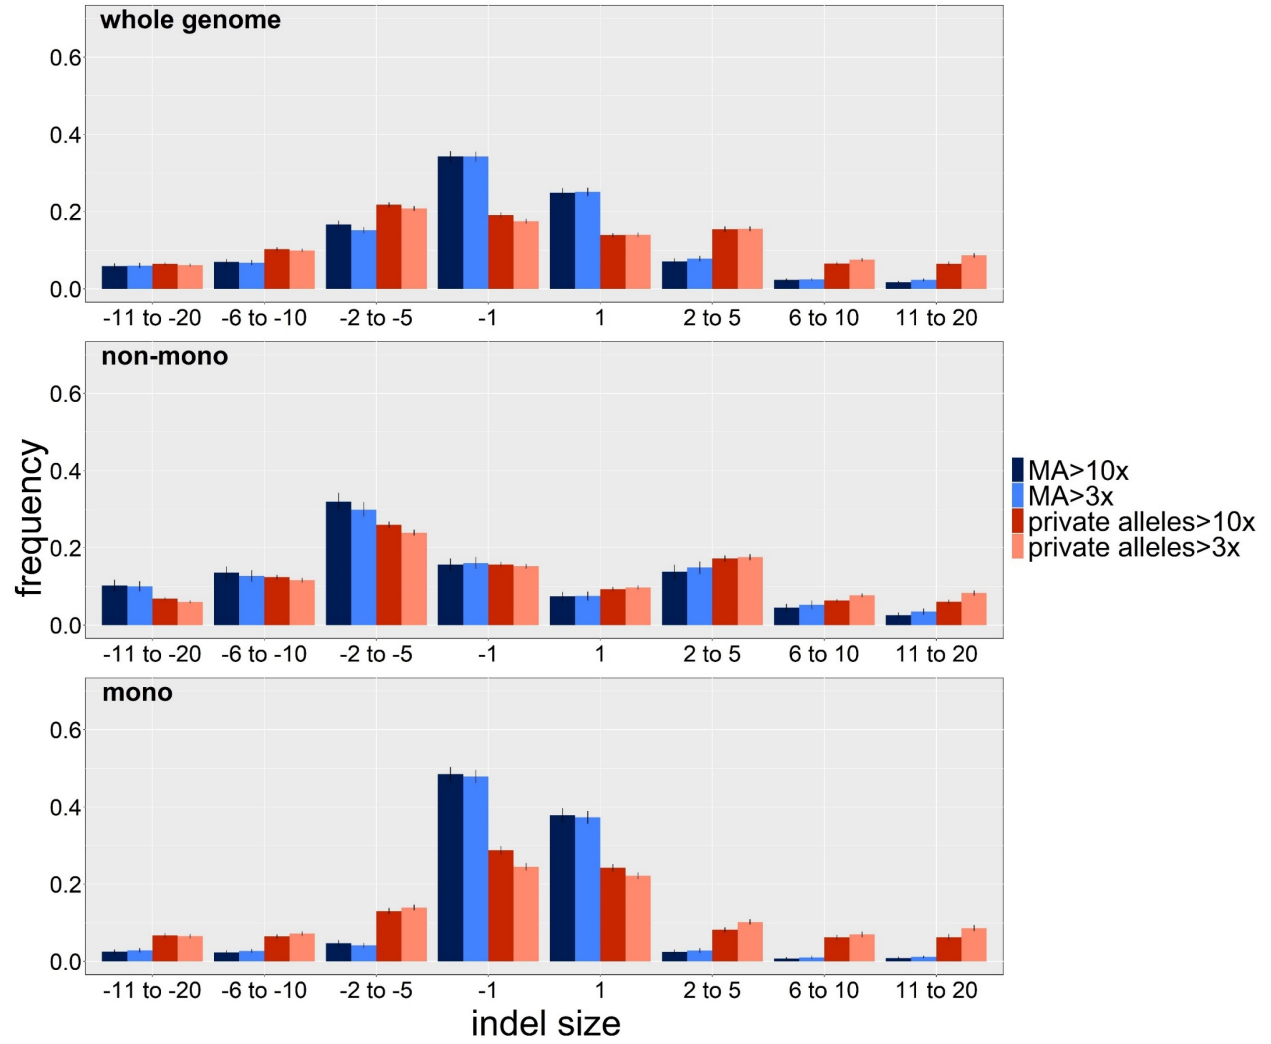

**Figure S11.** Indel spectra of MA vs private alleles using two different coverage threshold, 10x (dark colors) and 3x (light colors). Top panels whole-genome; middle panels non-monomucleotide sequence; bottom panels mononucleotide sequence. Error bars show SEM.

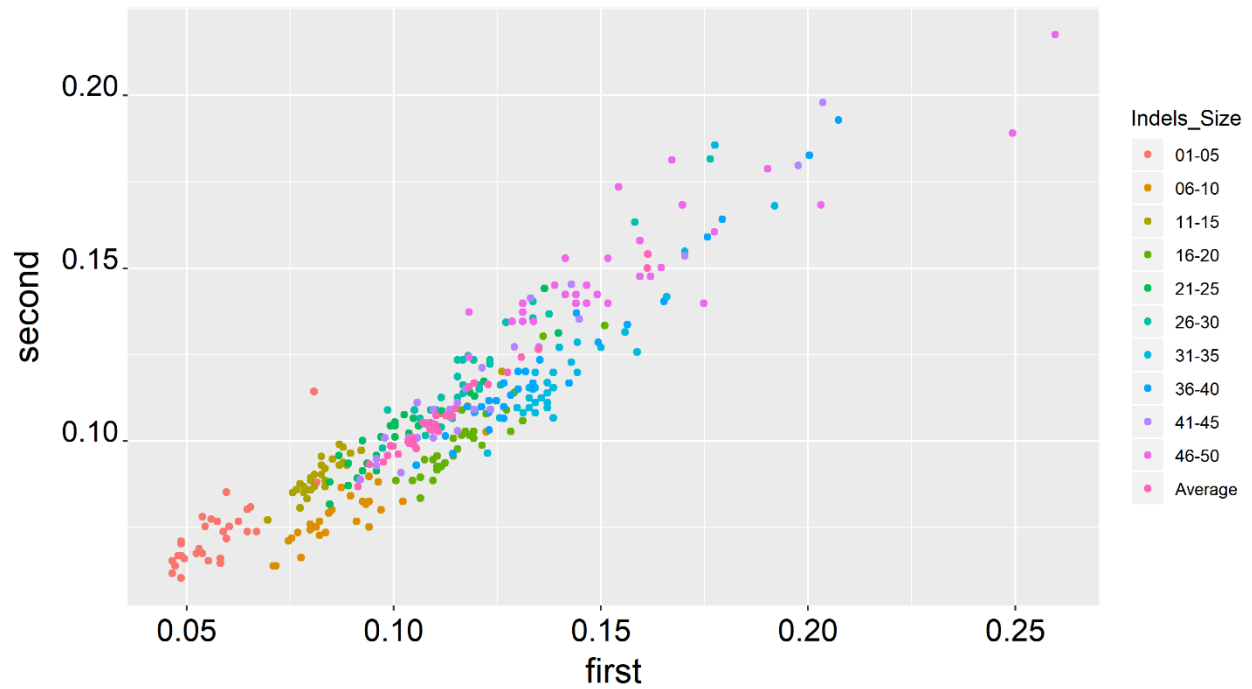

**Figure S12.** Plot of the failure to recall rates of the two simulated dummy data sets; the first simulation is on the x-axis, the second simulation is on the y-axis ( $r=0.93$ ,  $P < 0.0001$ ). Each data point of a given color represents an individual MA line ( $n=30$  simulated lines). See section 12 for explanation.

**Table S1 is submitted as an excel file with this name:**  
**Supplemental\_Table\_S1.xlsx**

**Supplemental Table S2. Tests of fixed effects.** See Appendix A1.5 for details of the general linear model (GLM) and Table 1 in the main text for trait values. The columns in tables below are: 1. Description of the fixed effect; 2. Degrees of freedom, determined by the Kenward-Roger method; 3. F-statistic; 4. P-value, not corrected for multiple tests. Further descriptions are underneath the tables.

| A. Fixed Effect ( $\mu_{BS}$ , by type) | DF (num, den) | F     | Pr>F    |
|-----------------------------------------|---------------|-------|---------|
| Base-substitution type (6)              | 5,130         | 267.1 | <0.0001 |
| Strain (3)                              | 2,222         | 5.25  | 0.0059  |
| Strain x base-sub type                  | 10,198        | 2.48  | 0.0081  |

A. Genome-wide base substitution mutation rates,  $\mu_{BS}$ , including all three strains of MA lines, the six types of base-substitution, and the interaction.

| B. Fixed Effect ( $\mu_{BS}$ , pooled) | DF (num, den) | F    | Pr>F   |
|----------------------------------------|---------------|------|--------|
| Strain ( <i>mev-1</i> vs N2)           | 1,56.8        | 15.4 | 0.0002 |

B. Pairwise-test of pooled genome-wide base-substitution rate difference between *mev-1* and N2.

| C. Fixed Effect ( $\mu_{BS}$ , pooled) | DF (num, den) | F    | Pr>F   |
|----------------------------------------|---------------|------|--------|
| Strain ( <i>mev-1</i> vs PB306)        | 1,49.1        | 7.88 | 0.0072 |

C. Pairwise-test of pooled genome-wide base-substitution rate difference between *mev-1* and PB306.

| D. Fixed Effect ( $\mu_{BS}$ , pooled) | DF (num, den) | F    | Pr>F   |
|----------------------------------------|---------------|------|--------|
| Strain (N2 vs PB306)                   | 1,131         | 2.10 | 0.1494 |

D. Pairwise-test of pooled genome-wide base-substitution rate difference between N2 and PB306.

| E. Fixed Effect ( $\mu_{GC \rightarrow TA}$ ) | DF (num, den) | F    | Pr>F   |
|-----------------------------------------------|---------------|------|--------|
| Strain (all 3)                                | 2,55.1        | 4.09 | 0.0221 |

E. Planned comparison among strains of the GC→TA transversion rate.

| F. Fixed Effect ( $\mu_{AT \rightarrow TA}$ ) | DF (num, den) | F    | Pr>F   |
|-----------------------------------------------|---------------|------|--------|
| Strain (all 3)                                | 2,58.7        | 4.25 | 0.0189 |

F. Post hoc comparison among strains of AT→TA transversion rate.

| G. Fixed Effect ( $\mu_{INS}$ ) | DF (num, den) | F    | Pr>F   |
|---------------------------------|---------------|------|--------|
| Strain (all 3)                  | 2, 53.9       | 5.62 | 0.0061 |

G. Comparison among strains of the genome-wide insertion rate.

| H. Fixed Effect ( $\mu_{DEL}$ ) | DF (num, den) | F    | Pr>F   |
|---------------------------------|---------------|------|--------|
| Strain (all 3)                  | 2,60.8        | 5.74 | 0.0052 |

H. Comparison among strains of the genome-wide deletion rate.

| I. Fixed Effect ( $\mu_{INS}$ ) | DF (num, den) | F    | Pr>F   |
|---------------------------------|---------------|------|--------|
| Strain ( <i>mev-1</i> vs N2)    | 1, 26.9       | 8.06 | 0.0085 |

I. Pairwise test of genome-wide insertion rate difference between *mev-1* and N2.

| J. Fixed Effect ( $\mu_{DEL}$ ) | DF (num, den) | F    | Pr>F   |
|---------------------------------|---------------|------|--------|
| Strain ( <i>mev-1</i> vs N2)    | 1, 34.4       | 0.26 | 0.6129 |

J. Pairwise test of genome-wide deletion rate difference between *mev-1* and N2.

| K. Fixed Effect ( $\mu_{INS}$ ) | DF (num, den) | F    | Pr>F   |
|---------------------------------|---------------|------|--------|
| Strain ( <i>mev-1</i> vs PB306) | 1, 31.2       | 2.42 | 0.1295 |

K. Pairwise test of genome-wide insertion rate difference between *mev-1* and PB306.

| L. Fixed Effect ( $\mu_{DEL}$ ) | DF (num, den) | F    | Pr>F   |
|---------------------------------|---------------|------|--------|
| Strain ( <i>mev-1</i> vs PB306) | 1, 50.1       | 4.13 | 0.0474 |

L. Pairwise test of genome-wide deletion rate difference between *mev-1* and PB306.



| M. Fixed Effect ( $\mu_{INS}$ ) | DF (num, den) | F    | Pr>F   |
|---------------------------------|---------------|------|--------|
| Strain (N2 vs PB306)            | 1, 122        | 5.37 | 0.0221 |

M. Pairwise test of genome-wide insertion rate difference between N2 and PB306.

| N. Fixed Effect ( $\mu_{DEL}$ ) | DF (num, den) | F     | Pr>F   |
|---------------------------------|---------------|-------|--------|
| Strain (N2 vs PB306)            | 1, 115        | 11.48 | 0.0010 |

N. Pairwise test of genome-wide insertion rate difference between N2 and PB306.

| O. Fixed Effect ( $\mu_{BS}$ )           | DF (num, den) | F             | Pr>F              |
|------------------------------------------|---------------|---------------|-------------------|
| Strain (all 3)                           | 2, 272        | 0.89          | 0.4132            |
| <b>sequence type (non-mono vs. mono)</b> | <b>1, 243</b> | <b>120.92</b> | <b>&lt;0.0001</b> |
| Strain x seq. type                       | 2, 272        | 0.15          | 0.8611            |
| base-sub type (all 6)                    | 5, 140        | 146.34        | <0.0001           |
| Strain x base-sub type                   | 10, 228       | 1.95          | 0.0399            |
| <b>seq. type x base-sub type</b>         | <b>5, 140</b> | <b>86.49</b>  | <b>&lt;0.0001</b> |
| Strain x seq. type x base-sub type       | 10, 228       | 1.16          | 0.3202            |

O. Test of effects of sequence type (non-mononucleotide vs. mononucleotide), strain, base-substitution type, and all interactions on the base-substitution rate ( $\mu_{BS}$ ). The important comparisons are the ones highlighted in bold font.

| P. Fixed Effect ( $\mu_{AT \rightarrow TA}$ ) | DF (num, den)  | F             | Pr>F              |
|-----------------------------------------------|----------------|---------------|-------------------|
| Strain (all 3)                                | 2, 61.3        | 4.83          | 0.0113            |
| <b>sequence type (non-mono vs. mono)</b>      | <b>1, 51.6</b> | <b>464.99</b> | <b>&lt;0.0001</b> |
| Strain x seq. type                            | 2, 61.3        | 3.99          | 0.0235            |

P. Post-hoc test of the effect of sequence type (non-mononucleotide vs. mononucleotide), strain, and their interaction on the rate of AT→TA transversions.

| Q. Fixed Effect ( $\mu_{1BP\_INDEL}$ )   | DF (num, den)  | F             | Pr>F              |
|------------------------------------------|----------------|---------------|-------------------|
| Strain (all 3)                           | 2, 105         | 2.15          | 0.1217            |
| <b>sequence type (non-mono vs. mono)</b> | <b>1, 78.3</b> | <b>490.15</b> | <b>&lt;0.0001</b> |
| Strain x seq. type                       | 2, 105         | 1.94          | 0.1482            |
| Indel type (+/- 1 bp)                    | 1, 78.3        | 8.68          | 0.0042            |
| Strain x indel type                      | 2, 105         | 0.66          | 0.5172            |
| seq. type x indel type                   | 1, 78.3        | 7.02          | 0.0097            |
| Strain x seq. type x indel type          | 2, 105         | 0.60          | 0.5525            |

Q. Test of the effect of sequence type (non-mononucleotide vs. mononucleotide, strain, indel type (insertion vs. deletion), and their interactions on the rate of +/- 1 bp indels.

| R. Fixed Effect (5'-ttA-3')              | DF (num, den)  | F             | Pr>F              |
|------------------------------------------|----------------|---------------|-------------------|
| Strain (all 3)                           | 2, 57.6        | 4.78          | 0.0120            |
| <b>sequence type (non-mono vs. mono)</b> | <b>1, 48.5</b> | <b>210.49</b> | <b>&lt;0.0001</b> |
| Strain x seq. type                       | 2, 57.6        | 4.43          | 0.0162            |

R. Test of the effect of sequence type (non-mono vs. mono), strain, and their interaction on the rate of 5'-ttA-3' mutation.

**Table S3 is submitted as an excel file with this name:  
Supplemental\_Table\_S3.xlsx**

**Table S4 is submitted as an excel file with this name:  
Supplemental\_Table\_S4.xlsx**

**Table S5 is submitted as an excel file with this name:  
Supplemental\_Table\_S5.xlsx**

**Supplemental Table S6.** Correlations between base-substitution (SNP) and indel mutation rates. (a) *mev-1*; (b) N2; (c) PB306. Correlations are reported for each strain separately because the best-fit linear model includes the among-line covariance estimated separately for each strain. See Methods for details.

x

| (a) <i>mev-1</i> | Del | Ins   | SNP    |
|------------------|-----|-------|--------|
| Del              |     | -0.21 | 0.21   |
| Ins              |     |       | -0.025 |

| (b) N2 | Del | Ins    | SNP   |
|--------|-----|--------|-------|
| Del    |     | -0.065 | 0.24  |
| Ins    |     |        | -0.07 |

| (c) PB306 | Del | Ins  | SNP  |
|-----------|-----|------|------|
| Del       |     | 0.35 | 0.32 |
| Ins       |     |      | 0.09 |

**Supplemental Table S7.** Correlation matrix of the six type-specific base-substitution mutation rates. Data are pooled across strains because the best-fit linear model includes a single (pooled) estimate of the among-line covariance. See Methods for details. Two outliers were removed prior to analysis.

x

| Mut type | AT>GC | AT>TA | GC>AT | GC>CG | GC>TA | Row Ave |
|----------|-------|-------|-------|-------|-------|---------|
| AT>CG    | 0.27  | 0.10  | 0.19  | -0.03 | -0.06 | 0.09    |
| AT>GC    |       | 0.26  | 0.20  | 0.07  | -0.14 | 0.13    |
| AT>TA    |       |       | 0.17  | 0.06  | -0.03 | 0.11    |
| GC>AT    |       |       |       | 0.00  | -0.01 | 0.11    |
| GC>CG    |       |       |       |       | 0.09  | 0.04    |
| GC>TA    |       |       |       |       |       | -0.03   |

**Table S8 is submitted as an excel file with this name:  
Supplemental\_Table\_S8.xlsx**

**Table S9 is submitted as an excel file with this name:  
Supplemental\_Table\_S9.xlsx**

**Table S10 is submitted as an excel file with this name:  
Supplemental\_Table\_S10.xlsx**

**Table S11 is submitted as an excel file with this name:  
Supplemental\_Table\_S11.xlsx**

**Table S12.** Size distribution of the dummy indels introduced into the reference genome. See section 10 for explanation.

| <b>Bin (bp)</b> | <b>Deletions</b> | <b>Insertions</b> | <b>Total Indels</b> |
|-----------------|------------------|-------------------|---------------------|
| 1-5             | 668              | 707               | 1375                |
| 6-10            | 660              | 680               | 1340                |
| 11-20           | 1034             | 1130              | 2164                |
| 21-50           | 1898             | 1922              | 3820                |
| >50bp           | 639              | 652               | 1291                |
