# Supplementary material for: Mutability of mononucleotide repeats, not oxidative stress, explains the discrepancy between laboratory-accumulated mutations and the natural allele-frequency spectrum in C. elegans
Source: HighWire-hosted journal article supplement (doi:10.1101/gr.275372.121), 2021-08-17
Supplement: Supplemental_Table_S3.xlsx.xlsx [file Supplemental_Table_S3.xlsx.xlsx]

## Sheet: N2
Lines	Ts/Tv	SNP	DEL	INS	INDELs	%_bases_above_3	Ngen	SNPs MR	DEL MR	INS MR	INDELs MR	Total MR	µGENOME
502	0.71	53	5	3	8	98.2	239	2.25177e-09	2.12431e-10	1.27459e-10	3.3989e-10	2.59166e-09	0.25523
503	1.17	52	9	5	14	97.2	236.333	2.2572e-09	3.90669e-10	2.17038e-10	6.07708e-10	2.86491e-09	0.279267
504	0.46	41	9	5	14	98.5	211.833	1.95935e-09	4.301e-10	2.38945e-10	6.69045e-10	2.62839e-09	0.259638
505	0.62	42	6	3	9	98	235	1.8185e-09	2.59786e-10	1.29893e-10	3.89679e-10	2.20818e-09	0.217021
508	0.56	39	6	9	15	98.5	213.727	1.84725e-09	2.84193e-10	4.26289e-10	7.10482e-10	2.55773e-09	0.252658
509	1.11	59	7	5	12	96.5	243	2.50886e-09	2.97661e-10	2.12615e-10	5.10277e-10	3.01914e-09	0.292181
511	1.1	44	8	3	11	92.7	228.75	2.06904e-09	3.7619e-10	1.41071e-10	5.17261e-10	2.58631e-09	0.240437
512	0.92	46	10	11	21	97.6	229.8	2.04511e-09	4.44588e-10	4.89047e-10	9.33636e-10	2.97874e-09	0.291558
513	0.64	64	8	2	10	98	242	2.69089e-09	3.36362e-10	8.40904e-11	4.20452e-10	3.11135e-09	0.305785
514	0.7	51	3	1	4	97.1	241	2.17316e-09	1.27833e-10	4.2611e-11	1.70444e-10	2.3436e-09	0.228216
516	0.57	47	3	5	8	98.3	217.75	2.1895e-09	1.39755e-10	2.32925e-10	3.7268e-10	2.56218e-09	0.252583
520	0.74	75	15	4	19	97.9	244	3.13074e-09	6.26148e-10	1.66973e-10	7.9312e-10	3.92386e-09	0.385246
522	0.8	63	10	6	16	98.2	234.333	2.72994e-09	4.33324e-10	2.59994e-10	6.93318e-10	3.42326e-09	0.337127
523	0.6	69	7	5	12	96.5	243	2.93409e-09	2.97661e-10	2.12615e-10	5.10277e-10	3.44437e-09	0.333333
524	1	74	9	2	11	97.9	233.571	3.22691e-09	3.92462e-10	8.72139e-11	4.79676e-10	3.70659e-09	0.363914
525	0.83	55	4	4	8	98.3	224.444	2.48575e-09	1.80782e-10	1.80782e-10	3.61564e-10	2.84732e-09	0.280693
526	0.5	51	6	6	12	97.7	236	2.20557e-09	2.59479e-10	2.59479e-10	5.18959e-10	2.72453e-09	0.266949
529	0.5	39	11	6	17	98.3	243	1.62803e-09	4.59188e-10	2.50466e-10	7.09655e-10	2.33769e-09	0.230453
530	0.65	38	7	5	12	96.9	243	1.60921e-09	2.96433e-10	2.11738e-10	5.0817e-10	2.11738e-09	0.205761
531	0.69	44	13	4	17	98.2	233	1.91753e-09	5.66544e-10	1.74321e-10	7.40866e-10	2.6584e-09	0.261803
532	0.91	44	9	7	16	98.5	244	1.82551e-09	3.734e-10	2.90422e-10	6.63822e-10	2.48933e-09	0.245902
536	0.87	56	5	9	14	98.1	238	2.39166e-09	2.13541e-10	3.84374e-10	5.97916e-10	2.98958e-09	0.294118
537	0.8	54	8	10	18	98.4	243	2.25191e-09	3.33616e-10	4.1702e-10	7.50635e-10	3.00254e-09	0.296296
540	0.69	49	10	4	14	97.7	194.222	2.5749e-09	5.2549e-10	2.10196e-10	7.35686e-10	3.31059e-09	0.324371
541	0.87	43	7	5	12	97.7	237.5	1.84786e-09	3.00814e-10	2.14867e-10	5.15681e-10	2.36354e-09	0.231579
542	1	48	5	6	11	98.2	243	2.00577e-09	2.08935e-10	2.50721e-10	4.59656e-10	2.46543e-09	0.242798
543	0.5	51	11	7	18	98	243	2.13548e-09	4.60594e-10	2.93105e-10	7.53699e-10	2.88918e-09	0.283951
544	0.55	68	8	7	15	97.9	241	2.87387e-09	3.38102e-10	2.9584e-10	6.33942e-10	3.50781e-09	0.344398
545	0.82	62	12	3	15	97.8	244	2.59072e-09	5.0143e-10	1.25358e-10	6.26788e-10	3.21751e-09	0.315574
546	0.66	68	10	5	15	98	242	2.85907e-09	4.20452e-10	2.10226e-10	6.30678e-10	3.48975e-09	0.342975
547	0.71	48	9	5	14	98.6	242	2.00589e-09	3.76104e-10	2.08947e-10	5.85051e-10	2.59094e-09	0.256198
548	0.82	40	5	2	7	97.7	186.333	2.19095e-09	2.73869e-10	1.09548e-10	3.83417e-10	2.57437e-09	0.252236
550	1.52	53	4	3	7	98.3	227	2.3684e-09	1.78747e-10	1.3406e-10	3.12807e-10	2.6812e-09	0.264317
551	1	40	8	4	12	98.2	243	1.67148e-09	3.34295e-10	1.67148e-10	5.01443e-10	2.17292e-09	0.213992
552	2	42	6	4	10	97.5	241	1.78232e-09	2.54617e-10	1.69745e-10	4.24362e-10	2.20668e-09	0.215768
553	0.78	41	10	3	13	98	232.286	1.79595e-09	4.38036e-10	1.31411e-10	5.69446e-10	2.36539e-09	0.232472
554	0.63	57	9	4	13	97.9	237	2.44964e-09	3.86785e-10	1.71904e-10	5.58689e-10	3.00833e-09	0.295359
555	0.71	53	14	5	19	97.5	243	2.23061e-09	5.89217e-10	2.10435e-10	7.99651e-10	3.03026e-09	0.296296
556	0.59	43	7	3	10	98.2	244	1.78947e-09	2.9131e-10	1.24847e-10	4.16156e-10	2.20563e-09	0.217213
558	0.64	54	3	3	6	98.3	234.2	2.3389e-09	1.29939e-10	1.29939e-10	2.59878e-10	2.59878e-09	0.256191
563	0.71	58	9	7	16	98.3	237	2.48247e-09	3.85211e-10	2.99608e-10	6.84819e-10	3.16729e-09	0.312236
565	0.96	49	15	4	19	98.2	237.667	2.09351e-09	6.40869e-10	1.70898e-10	8.11768e-10	2.90527e-09	0.286115
566	0.45	58	6	5	11	98.6	244	2.40392e-09	2.48681e-10	2.07234e-10	4.55915e-10	2.85983e-09	0.282787
567	0.82	51	6	5	11	97.9	226.071	2.29773e-09	2.70322e-10	2.25268e-10	4.9559e-10	2.79332e-09	0.27425
569	0.91	42	10	3	13	98.2	237.6	1.79494e-09	4.27366e-10	1.2821e-10	5.55576e-10	2.35051e-09	0.231481
572	0.51	80	19	4	23	96.2	212.45	3.90316e-09	9.27e-10	1.95158e-10	1.12216e-09	5.02532e-09	0.48482
573	0.77	46	10	4	14	98.6	243	1.9144e-09	4.16174e-10	1.6647e-10	5.82643e-10	2.49704e-09	0.246914
574	0.31	46	12	3	15	98	237	1.97488e-09	5.15187e-10	1.28797e-10	6.43984e-10	2.61887e-09	0.257384
575	0.83	44	9	3	12	98.7	229.75	1.93481e-09	3.95756e-10	1.31919e-10	5.27675e-10	2.46248e-09	0.243743
577	0.75	49	2	11	13	97.9	227.154	2.19711e-09	8.96778e-11	4.93228e-10	5.82906e-10	2.78001e-09	0.272943
578	0.76	37	13	4	17	98	243	1.54927e-09	5.44338e-10	1.67489e-10	7.11827e-10	2.2611e-09	0.222222
579	1.09	46	8	2	10	98.1	230.556	2.02802e-09	3.52698e-10	8.81746e-11	4.40873e-10	2.46889e-09	0.242892
580	1	46	6	5	11	98.1	241	1.94013e-09	2.5306e-10	2.10883e-10	4.63943e-10	2.40407e-09	0.236515
581	0.64	54	12	6	18	97.9	243	2.26341e-09	5.02979e-10	2.5149e-10	7.54469e-10	3.01788e-09	0.296296
582	0.62	47	6	7	13	96.9	208.333	2.32152e-09	2.96365e-10	3.45759e-10	6.42124e-10	2.96365e-09	0.288
584	0.93	52	5	4	9	98.2	244	2.16401e-09	2.08078e-10	1.66463e-10	3.74541e-10	2.53855e-09	0.25
585	0.46	38	7	5	12	98.1	244	1.58301e-09	2.91606e-10	2.0829e-10	4.99897e-10	2.0829e-09	0.204918
586	0.82	62	11	7	18	97.9	243	2.59873e-09	4.61064e-10	2.93405e-10	7.54469e-10	3.3532e-09	0.329218
587	0.39	46	8	7	15	97.7	227.4	2.06458e-09	3.59057e-10	3.14175e-10	6.73231e-10	2.73781e-09	0.26825
589	0.47	47	7	1	8	97.9	225.714	2.12087e-09	3.15874e-10	4.51249e-11	3.60999e-10	2.48187e-09	0.243671
590	0.73	52	10	4	14	97.5	244	2.17955e-09	4.19144e-10	1.67658e-10	5.86802e-10	2.76635e-09	0.270492
591	0.78	48	9	6	15	98.1	238.75	2.04356e-09	3.83167e-10	2.55445e-10	6.38612e-10	2.68217e-09	0.263874
592	0.8	36	17	6	23	97.3	243	1.51824e-09	7.16948e-10	2.53041e-10	9.69989e-10	2.48823e-09	0.242798
593	1.21	64	9	6	15	97.9	221.353	2.9449e-09	4.14126e-10	2.76084e-10	6.9021e-10	3.63511e-09	0.356896
594	0.68	52	7	9	16	97.9	242	2.18858e-09	2.94617e-10	3.78793e-10	6.7341e-10	2.86199e-09	0.280992
595	0.68	32	6	6	12	95.2	236.333	1.41823e-09	2.65918e-10	2.65918e-10	5.31835e-10	1.95006e-09	0.186178
597	0.87	43	5	2	7	98.1	223	1.95998e-09	2.27905e-10	9.1162e-11	3.19067e-10	2.27905e-09	0.224215
598	0.75	49	7	2	9	97.9	223	2.23803e-09	3.19719e-10	9.13483e-11	4.11067e-10	2.6491e-09	0.26009

## Sheet: mev-1
Lines	Ts/Tv	SNP	DEL	INS	INDELs	%_bases_above_3	Ngens	SNPs MR	DEL MR	INS MR	INDELs MR	Total MR	µGENOME
704	1.14	15	4	4	8	97.9	119	1.28387e-09	3.42364e-10	3.42364e-10	6.84728e-10	1.96859e-09	0.193277
706	0.62	26	7	4	11	98.2	120	2.20008e-09	5.92329e-10	3.38474e-10	9.30803e-10	3.13088e-09	0.308333
711	0.43	20	1	7	8	98	117	1.73931e-09	8.69653e-11	6.08757e-10	6.95722e-10	2.43503e-09	0.239316
712	0.47	25	4	6	10	98.1	123	2.06597e-09	3.30555e-10	4.95833e-10	8.26388e-10	2.89236e-09	0.284553
715	0.65	28	3	5	8	98	120	2.37415e-09	2.54374e-10	4.23956e-10	6.78329e-10	3.05248e-09	0.3
721	1	18	3	2	5	97.8	123	1.49206e-09	2.48677e-10	1.65785e-10	4.14461e-10	1.90652e-09	0.186992
727	1.2	22	5	8	13	98.2	116	1.9258e-09	4.37682e-10	7.00291e-10	1.13797e-09	3.06377e-09	0.301724
729	0.69	22	5	3	8	98.1	124	1.80339e-09	4.09862e-10	2.45917e-10	6.55779e-10	2.45917e-09	0.241935
733	1.75	22	8	4	12	98	121	1.84999e-09	6.72723e-10	3.36362e-10	1.00909e-09	2.85907e-09	0.280992
737	0.78	16	3	4	7	98.2	107	1.51839e-09	2.84698e-10	3.79597e-10	6.64295e-10	2.18268e-09	0.214953
738	0.38	18	7	1	8	98.2	123	1.48598e-09	5.77882e-10	8.25546e-11	6.60437e-10	2.14642e-09	0.211382
744	0.75	21	5	4	9	98.2	121	1.7623e-09	4.19596e-10	3.35677e-10	7.55272e-10	2.51757e-09	0.247934
746	0.58	19	2	3	5	97.8	117	1.65572e-09	1.74286e-10	2.61429e-10	4.35716e-10	2.09144e-09	0.205128
748	0.69	22	2	2	4	98	119	1.88108e-09	1.71007e-10	1.71007e-10	3.42015e-10	2.2231e-09	0.218487
749	0.18	20	5	3	8	97.4	120	1.70627e-09	4.26567e-10	2.5594e-10	6.82508e-10	2.38878e-09	0.233333
752	0.83	22	7	5	12	98.4	112	1.99052e-09	6.33349e-10	4.52392e-10	1.08574e-09	3.07627e-09	0.303571
753	0.79	25	6	0	6	97.5	120	2.13065e-09	5.11356e-10	0	5.11356e-10	2.64201e-09	0.258333
759	0.58	30	6	3	9	98.1	118	2.58421e-09	5.16842e-10	2.58421e-10	7.75264e-10	3.35948e-09	0.330508
761	0.33	28	6	1	7	97.5	121	2.36661e-09	5.0713e-10	8.45217e-11	5.91652e-10	2.95826e-09	0.289256
767	0.64	23	2	6	8	98.1	119	1.96458e-09	1.70833e-10	5.12499e-10	6.83332e-10	2.64791e-09	0.260504
769	0.64	23	2	2	4	98.1	110	2.12532e-09	1.8481e-10	1.8481e-10	3.69621e-10	2.49494e-09	0.245455
770	0.57	22	5	5	10	98.2	123	1.8162e-09	4.12773e-10	4.12773e-10	8.25546e-10	2.64175e-09	0.260163
1730	1.1	21	5	3	8	98.1	117	1.82441e-09	4.34383e-10	2.6063e-10	6.95013e-10	2.51942e-09	0.247863

## Sheet: PB30
Lines	Ts/Tv	SNP	DEL	INS	INDELs	%_bases_above_3	Ngens	SNPs MR	DEL MR	INS MR	INDELs MR	Total MR	µGENOME
402	0.68	69	19	11	30	93	231.875	3.19058e-09	8.78567e-10	5.08644e-10	1.38721e-09	4.57779e-09	0.426954
403	0.52	50	9	2	11	96.3	220.769	2.34511e-09	4.2212e-10	9.38044e-11	5.15924e-10	2.86103e-09	0.276307
405	0.65	38	8	5	13	96	218.667	1.80504e-09	3.80009e-10	2.37506e-10	6.17515e-10	2.42256e-09	0.233232
406	0.58	41	12	5	17	96.3	235	1.80654e-09	5.28744e-10	2.2031e-10	7.49053e-10	2.55559e-09	0.246809
407	1.05	45	10	4	14	96.4	224.2	2.07615e-09	4.61366e-10	1.84546e-10	6.45912e-10	2.72206e-09	0.263158
410	1.29	48	12	8	20	96.2	224.727	2.21395e-09	5.53488e-10	3.68992e-10	9.2248e-10	3.13643e-09	0.302589
414	0.72	43	7	2	9	96.2	240	1.85712e-09	3.02322e-10	8.63777e-11	3.887e-10	2.24582e-09	0.216667
415	1.1	42	7	3	10	96.2	223.333	1.9493e-09	3.24883e-10	1.39236e-10	4.64119e-10	2.41342e-09	0.232836
416	0.79	34	6	7	13	96.3	231	1.52405e-09	2.6895e-10	3.13775e-10	5.82724e-10	2.10677e-09	0.203463
418	0.56	39	2	6	8	96.3	220.542	1.83107e-09	9.39012e-11	2.81704e-10	3.75605e-10	2.20668e-09	0.213112
419	0.75	42	2	3	5	96.5	189.548	2.2896e-09	1.09029e-10	1.63543e-10	2.72572e-10	2.56217e-09	0.247958
420	1.2	55	16	6	22	96.3	237	2.40296e-09	6.99042e-10	2.62141e-10	9.61183e-10	3.36414e-09	0.324895
421	0.48	49	14	5	19	95.8	231.8	2.20027e-09	6.28647e-10	2.24517e-10	8.53164e-10	3.05343e-09	0.293356
423	0.77	55	18	6	24	95.4	228	2.52137e-09	8.25177e-10	2.75059e-10	1.10024e-09	3.62161e-09	0.346491
424	0.63	31	5	9	14	94.5	239	1.36864e-09	2.20749e-10	3.97348e-10	6.18096e-10	1.98674e-09	0.188285
425	0.89	51	14	3	17	95.3	221.75	2.40642e-09	6.60586e-10	1.41554e-10	8.0214e-10	3.20856e-09	0.306652
426	1	56	11	5	16	96.1	227.769	2.5511e-09	5.01109e-10	2.27777e-10	7.28886e-10	3.27999e-09	0.316109
428	0.71	60	13	3	16	96.2	234.143	2.65615e-09	5.755e-10	1.32808e-10	7.08308e-10	3.36446e-09	0.324588
429	0.84	68	21	5	26	96.4	224.077	3.13901e-09	9.694e-10	2.3081e-10	1.20021e-09	4.33922e-09	0.419499
430	0.57	44	9	8	17	96.2	212	2.15129e-09	4.40037e-10	3.91144e-10	8.31182e-10	2.98248e-09	0.287736
432	0.89	53	17	6	23	96.4	228	2.40448e-09	7.7125e-10	2.72206e-10	1.04346e-09	3.44794e-09	0.333333
435	0.6	40	14	3	17	96.3	235.5	1.75874e-09	6.15558e-10	1.31905e-10	7.47463e-10	2.5062e-09	0.242038
436	0.68	52	4	7	11	96.2	224.8	2.39767e-09	1.84436e-10	3.22764e-10	5.072e-10	2.90487e-09	0.280249
437	0.81	49	11	6	17	96.1	228.2	2.228e-09	5.00163e-10	2.72816e-10	7.72979e-10	3.00098e-09	0.28922
440	0.92	46	10	3	13	95.8	213.429	2.24335e-09	4.87686e-10	1.46306e-10	6.33991e-10	2.87734e-09	0.276439
442	0.69	54	3	5	8	95.2	227.545	2.48569e-09	1.38094e-10	2.30156e-10	3.6825e-10	2.85394e-09	0.272473
443	0.83	44	10	5	15	96.3	225.5	2.0204e-09	4.59182e-10	2.29591e-10	6.88773e-10	2.70918e-09	0.261641
445	0.64	59	8	7	15	95.9	231.857	2.64588e-09	3.58764e-10	3.13918e-10	6.72682e-10	3.31857e-09	0.319162
448	1	30	5	4	9	96.5	235.143	1.31832e-09	2.1972e-10	1.75776e-10	3.95495e-10	1.71381e-09	0.165857
449	0.71	36	6	7	13	96.1	220.909	1.69092e-09	2.8182e-10	3.2879e-10	6.10611e-10	2.30153e-09	0.221811
450	1.12	51	3	6	9	96.3	220.375	2.39629e-09	1.40958e-10	2.81917e-10	4.22875e-10	2.81917e-09	0.272263
451	0.47	47	8	11	19	96.5	226.167	2.14734e-09	3.65504e-10	5.02568e-10	8.68072e-10	3.01541e-09	0.29182
455	0.62	34	14	4	18	96.2	222.75	1.58214e-09	6.51468e-10	1.86134e-10	8.37602e-10	2.41974e-09	0.233446
456	0.62	42	8	2	10	96.1	233	1.87037e-09	3.56261e-10	8.90653e-11	4.45327e-10	2.3157e-09	0.223176
457	0.61	61	6	3	9	96.3	225.571	2.80012e-09	2.75422e-10	1.37711e-10	4.13133e-10	3.21326e-09	0.310323
458	0.64	54	9	5	14	96.3	233.857	2.39097e-09	3.98496e-10	2.21386e-10	6.19882e-10	3.01086e-09	0.290776
459	0.83	44	7	9	16	96.5	235	1.93471e-09	3.07794e-10	3.95736e-10	7.0353e-10	2.63824e-09	0.255319
461	0.46	41	14	7	21	96.3	230.455	1.84217e-09	6.29034e-10	3.14517e-10	9.43552e-10	2.78572e-09	0.269034
462	0.71	29	7	8	15	96.4	227.8	1.31682e-09	3.17852e-10	3.6326e-10	6.81112e-10	1.99793e-09	0.193152
463	1.18	37	13	5	18	94.7	230.077	1.69331e-09	5.94947e-10	2.28826e-10	8.23773e-10	2.51708e-09	0.23905
466	0.96	49	10	7	17	96.3	239	2.1229e-09	4.33245e-10	3.03272e-10	7.36517e-10	2.85942e-09	0.276151
468	0.96	49	15	6	21	96.2	233.25	2.1775e-09	6.6658e-10	2.66632e-10	9.33212e-10	3.11071e-09	0.300107
469	0.75	35	8	3	11	94.8	233	1.58002e-09	3.61147e-10	1.3543e-10	4.96577e-10	2.07659e-09	0.197425
470	0.65	28	9	1	10	96.4	209.487	1.38255e-09	4.44392e-10	4.93769e-11	4.93769e-10	1.87632e-09	0.181395
471	0.86	41	8	4	12	97	212.727	1.98128e-09	3.86592e-10	1.93296e-10	5.79888e-10	2.56117e-09	0.249145
472	0.52	38	11	7	18	94.3	223.842	1.7951e-09	5.19634e-10	3.30676e-10	8.50309e-10	2.64541e-09	0.250176
474	0.91	42	7	6	13	96.3	214	2.0322e-09	3.38701e-10	2.90315e-10	6.29015e-10	2.66122e-09	0.257009
475	0.61	50	18	7	25	95.9	231.429	2.24643e-09	8.08714e-10	3.145e-10	1.12321e-09	3.36964e-09	0.324074
476	0.7	46	11	2	13	96.5	241	1.97229e-09	4.71635e-10	8.57519e-11	5.57387e-10	2.52968e-09	0.244813
477	0.83	42	11	6	17	96.3	215.667	2.0165e-09	5.28131e-10	2.88071e-10	8.16202e-10	2.8327e-09	0.27357
479	1	56	13	5	18	96.2	233.5	2.4859e-09	5.77084e-10	2.21956e-10	7.9904e-10	3.28494e-09	0.316916
480	0.56	50	9	2	11	96.1	222.333	2.33346e-09	4.20022e-10	9.33383e-11	5.13361e-10	2.84682e-09	0.274363
481	1.04	47	25	18	43	96.4	220.125	2.20856e-09	1.17477e-09	8.45832e-10	2.0206e-09	4.22916e-09	0.408859
482	0.52	38	5	4	9	96.3	226.455	1.73754e-09	2.28623e-10	1.82899e-10	4.11522e-10	2.14906e-09	0.207547
483	1.17	39	8	8	16	96.2	232	1.74245e-09	3.57425e-10	3.57425e-10	7.1485e-10	2.4573e-09	0.237069
484	0.62	65	6	6	12	96.3	233.286	2.88507e-09	2.66314e-10	2.66314e-10	5.32629e-10	3.4177e-09	0.330067
486	0.78	48	6	9	15	96.7	229.333	2.15827e-09	2.69784e-10	4.04675e-10	6.74459e-10	2.83273e-09	0.274709
487	0.83	42	7	2	9	96.4	227.143	1.91263e-09	3.18772e-10	9.10777e-11	4.09849e-10	2.32248e-09	0.224528
488	0.67	60	10	4	14	96.3	222	2.79853e-09	4.66422e-10	1.86569e-10	6.5299e-10	3.45152e-09	0.333333
489	0.62	52	11	5	16	96.4	237	2.26953e-09	4.80093e-10	2.18224e-10	6.98317e-10	2.96785e-09	0.28692
490	0.77	55	20	11	31	94.4	232	2.50415e-09	9.10601e-10	5.0083e-10	1.41143e-09	3.91558e-09	0.37069
492	0.77	55	14	7	21	96.3	233.571	2.43823e-09	6.2064e-10	3.1032e-10	9.3096e-10	3.36919e-09	0.325382
495	1.14	47	7	1	8	96.3	229.444	2.12106e-09	3.15902e-10	4.51288e-11	3.61031e-10	2.48209e-09	0.239709
496	1.47	37	11	8	19	96	227.667	1.68806e-09	5.01857e-10	3.64987e-10	8.66844e-10	2.55491e-09	0.245974
497	0.96	49	10	7	17	96.3	231	2.19642e-09	4.48249e-10	3.13775e-10	7.62024e-10	2.95845e-09	0.285714
498	0.88	45	10	6	16	96.3	219.467	2.12313e-09	4.71806e-10	2.83083e-10	7.54889e-10	2.87801e-09	0.277947
500	0.79	43	19	6	25	96.5	226.818	1.95894e-09	8.65578e-10	2.73341e-10	1.13892e-09	3.09786e-09	0.2998

## Sheet: allstrains
Strain	Line	TsTv	SNP	DEL	INS	Indel	Pct_bases_above_3	Ngen	SNPrate	Delrate	Insrate	Indelrate	Total MR	Ugenome
PB306	402	0.68	69	19	11	30	93	231.875	3.19058e-09	8.78567e-10	5.08644e-10	1.38721e-09	4.57779e-09	0.426954
PB306	403	0.52	50	9	2	11	96.3	220.769	2.34511e-09	4.2212e-10	9.38044e-11	5.15924e-10	2.86103e-09	0.276307
PB306	405	0.65	38	8	5	13	96	218.667	1.80504e-09	3.80009e-10	2.37506e-10	6.17515e-10	2.42256e-09	0.233232
PB306	406	0.58	41	12	5	17	96.3	235	1.80654e-09	5.28744e-10	2.2031e-10	7.49053e-10	2.55559e-09	0.246809
PB306	407	1.05	45	10	4	14	96.4	224.2	2.07615e-09	4.61366e-10	1.84546e-10	6.45912e-10	2.72206e-09	0.263158
PB306	410	1.29	48	12	8	20	96.2	224.727	2.21395e-09	5.53488e-10	3.68992e-10	9.2248e-10	3.13643e-09	0.302589
PB306	414	0.72	43	7	2	9	96.2	240	1.85712e-09	3.02322e-10	8.63777e-11	3.887e-10	2.24582e-09	0.216667
PB306	415	1.1	42	7	3	10	96.2	223.333	1.9493e-09	3.24883e-10	1.39236e-10	4.64119e-10	2.41342e-09	0.232836
PB306	416	0.79	34	6	7	13	96.3	231	1.52405e-09	2.6895e-10	3.13775e-10	5.82724e-10	2.10677e-09	0.203463
PB306	418	0.56	39	2	6	8	96.3	220.542	1.83107e-09	9.39012e-11	2.81704e-10	3.75605e-10	2.20668e-09	0.213112
PB306	419	0.75	42	2	3	5	96.5	189.548	2.2896e-09	1.09029e-10	1.63543e-10	2.72572e-10	2.56217e-09	0.247958
PB306	420	1.2	55	16	6	22	96.3	237	2.40296e-09	6.99042e-10	2.62141e-10	9.61183e-10	3.36414e-09	0.324895
PB306	421	0.48	49	14	5	19	95.8	231.8	2.20027e-09	6.28647e-10	2.24517e-10	8.53164e-10	3.05343e-09	0.293356
PB306	423	0.77	55	18	6	24	95.4	228	2.52137e-09	8.25177e-10	2.75059e-10	1.10024e-09	3.62161e-09	0.346491
PB306	424	0.63	31	5	9	14	94.5	239	1.36864e-09	2.20749e-10	3.97348e-10	6.18096e-10	1.98674e-09	0.188285
PB306	425	0.89	51	14	3	17	95.3	221.75	2.40642e-09	6.60586e-10	1.41554e-10	8.0214e-10	3.20856e-09	0.306652
PB306	426	1	56	11	5	16	96.1	227.769	2.5511e-09	5.01109e-10	2.27777e-10	7.28886e-10	3.27999e-09	0.316109
PB306	428	0.71	60	13	3	16	96.2	234.143	2.65615e-09	5.755e-10	1.32808e-10	7.08308e-10	3.36446e-09	0.324588
PB306	429	0.84	68	21	5	26	96.4	224.077	3.13901e-09	9.694e-10	2.3081e-10	1.20021e-09	4.33922e-09	0.419499
PB306	430	0.57	44	9	8	17	96.2	212	2.15129e-09	4.40037e-10	3.91144e-10	8.31182e-10	2.98248e-09	0.287736
PB306	432	0.89	53	17	6	23	96.4	228	2.40448e-09	7.7125e-10	2.72206e-10	1.04346e-09	3.44794e-09	0.333333
PB306	435	0.6	40	14	3	17	96.3	235.5	1.75874e-09	6.15558e-10	1.31905e-10	7.47463e-10	2.5062e-09	0.242038
PB306	436	0.68	52	4	7	11	96.2	224.8	2.39767e-09	1.84436e-10	3.22764e-10	5.072e-10	2.90487e-09	0.280249
PB306	437	0.81	49	11	6	17	96.1	228.2	2.228e-09	5.00163e-10	2.72816e-10	7.72979e-10	3.00098e-09	0.28922
PB306	440	0.92	46	10	3	13	95.8	213.429	2.24335e-09	4.87686e-10	1.46306e-10	6.33991e-10	2.87734e-09	0.276439
PB306	442	0.69	54	3	5	8	95.2	227.545	2.48569e-09	1.38094e-10	2.30156e-10	3.6825e-10	2.85394e-09	0.272473
PB306	443	0.83	44	10	5	15	96.3	225.5	2.0204e-09	4.59182e-10	2.29591e-10	6.88773e-10	2.70918e-09	0.261641
PB306	445	0.64	59	8	7	15	95.9	231.857	2.64588e-09	3.58764e-10	3.13918e-10	6.72682e-10	3.31857e-09	0.319162
PB306	448	1	30	5	4	9	96.5	235.143	1.31832e-09	2.1972e-10	1.75776e-10	3.95495e-10	1.71381e-09	0.165857
PB306	449	0.71	36	6	7	13	96.1	220.909	1.69092e-09	2.8182e-10	3.2879e-10	6.10611e-10	2.30153e-09	0.221811
PB306	450	1.12	51	3	6	9	96.3	220.375	2.39629e-09	1.40958e-10	2.81917e-10	4.22875e-10	2.81917e-09	0.272263
PB306	451	0.47	47	8	11	19	96.5	226.167	2.14734e-09	3.65504e-10	5.02568e-10	8.68072e-10	3.01541e-09	0.29182
PB306	455	0.62	34	14	4	18	96.2	222.75	1.58214e-09	6.51468e-10	1.86134e-10	8.37602e-10	2.41974e-09	0.233446
PB306	456	0.62	42	8	2	10	96.1	233	1.87037e-09	3.56261e-10	8.90653e-11	4.45327e-10	2.3157e-09	0.223176
PB306	457	0.61	61	6	3	9	96.3	225.571	2.80012e-09	2.75422e-10	1.37711e-10	4.13133e-10	3.21326e-09	0.310323
PB306	458	0.64	54	9	5	14	96.3	233.857	2.39097e-09	3.98496e-10	2.21386e-10	6.19882e-10	3.01086e-09	0.290776
PB306	459	0.83	44	7	9	16	96.5	235	1.93471e-09	3.07794e-10	3.95736e-10	7.0353e-10	2.63824e-09	0.255319
PB306	461	0.46	41	14	7	21	96.3	230.455	1.84217e-09	6.29034e-10	3.14517e-10	9.43552e-10	2.78572e-09	0.269034
PB306	462	0.71	29	7	8	15	96.4	227.8	1.31682e-09	3.17852e-10	3.6326e-10	6.81112e-10	1.99793e-09	0.193152
PB306	463	1.18	37	13	5	18	94.7	230.077	1.69331e-09	5.94947e-10	2.28826e-10	8.23773e-10	2.51708e-09	0.23905
PB306	466	0.96	49	10	7	17	96.3	239	2.1229e-09	4.33245e-10	3.03272e-10	7.36517e-10	2.85942e-09	0.276151
PB306	468	0.96	49	15	6	21	96.2	233.25	2.1775e-09	6.6658e-10	2.66632e-10	9.33212e-10	3.11071e-09	0.300107
PB306	469	0.75	35	8	3	11	94.8	233	1.58002e-09	3.61147e-10	1.3543e-10	4.96577e-10	2.07659e-09	0.197425
PB306	470	0.65	28	9	1	10	96.4	209.487	1.38255e-09	4.44392e-10	4.93769e-11	4.93769e-10	1.87632e-09	0.181395
PB306	471	0.86	41	8	4	12	97	212.727	1.98128e-09	3.86592e-10	1.93296e-10	5.79888e-10	2.56117e-09	0.249145
PB306	472	0.52	38	11	7	18	94.3	223.842	1.7951e-09	5.19634e-10	3.30676e-10	8.50309e-10	2.64541e-09	0.250176
PB306	474	0.91	42	7	6	13	96.3	214	2.0322e-09	3.38701e-10	2.90315e-10	6.29015e-10	2.66122e-09	0.257009
PB306	475	0.61	50	18	7	25	95.9	231.429	2.24643e-09	8.08714e-10	3.145e-10	1.12321e-09	3.36964e-09	0.324074
PB306	476	0.7	46	11	2	13	96.5	241	1.97229e-09	4.71635e-10	8.57519e-11	5.57387e-10	2.52968e-09	0.244813
PB306	477	0.83	42	11	6	17	96.3	215.667	2.0165e-09	5.28131e-10	2.88071e-10	8.16202e-10	2.8327e-09	0.27357
PB306	479	1	56	13	5	18	96.2	233.5	2.4859e-09	5.77084e-10	2.21956e-10	7.9904e-10	3.28494e-09	0.316916
PB306	480	0.56	50	9	2	11	96.1	222.333	2.33346e-09	4.20022e-10	9.33383e-11	5.13361e-10	2.84682e-09	0.274363
PB306	481	1.04	47	25	18	43	96.4	220.125	2.20856e-09	1.17477e-09	8.45832e-10	2.0206e-09	4.22916e-09	0.408859
PB306	482	0.52	38	5	4	9	96.3	226.455	1.73754e-09	2.28623e-10	1.82899e-10	4.11522e-10	2.14906e-09	0.207547
PB306	483	1.17	39	8	8	16	96.2	232	1.74245e-09	3.57425e-10	3.57425e-10	7.1485e-10	2.4573e-09	0.237069
PB306	484	0.62	65	6	6	12	96.3	233.286	2.88507e-09	2.66314e-10	2.66314e-10	5.32629e-10	3.4177e-09	0.330067
PB306	486	0.78	48	6	9	15	96.7	229.333	2.15827e-09	2.69784e-10	4.04675e-10	6.74459e-10	2.83273e-09	0.274709
PB306	487	0.83	42	7	2	9	96.4	227.143	1.91263e-09	3.18772e-10	9.10777e-11	4.09849e-10	2.32248e-09	0.224528
PB306	488	0.67	60	10	4	14	96.3	222	2.79853e-09	4.66422e-10	1.86569e-10	6.5299e-10	3.45152e-09	0.333333
PB306	489	0.62	52	11	5	16	96.4	237	2.26953e-09	4.80093e-10	2.18224e-10	6.98317e-10	2.96785e-09	0.28692
PB306	490	0.77	55	20	11	31	94.4	232	2.50415e-09	9.10601e-10	5.0083e-10	1.41143e-09	3.91558e-09	0.37069
PB306	492	0.77	55	14	7	21	96.3	233.571	2.43823e-09	6.2064e-10	3.1032e-10	9.3096e-10	3.36919e-09	0.325382
PB306	495	1.14	47	7	1	8	96.3	229.444	2.12106e-09	3.15902e-10	4.51288e-11	3.61031e-10	2.48209e-09	0.239709
PB306	496	1.47	37	11	8	19	96	227.667	1.68806e-09	5.01857e-10	3.64987e-10	8.66844e-10	2.55491e-09	0.245974
PB306	497	0.96	49	10	7	17	96.3	231	2.19642e-09	4.48249e-10	3.13775e-10	7.62024e-10	2.95845e-09	0.285714
PB306	498	0.88	45	10	6	16	96.3	219.467	2.12313e-09	4.71806e-10	2.83083e-10	7.54889e-10	2.87801e-09	0.277947
PB306	500	0.79	43	19	6	25	96.5	226.818	1.95894e-09	8.65578e-10	2.73341e-10	1.13892e-09	3.09786e-09	0.2998
N2	502	0.71	53	5	3	8	98.2	239	2.25177e-09	2.12431e-10	1.27459e-10	3.3989e-10	2.59166e-09	0.25523
N2	503	1.17	52	9	5	14	97.2	236.333	2.2572e-09	3.90669e-10	2.17038e-10	6.07708e-10	2.86491e-09	0.279267
N2	504	0.46	41	9	5	14	98.5	211.833	1.95935e-09	4.301e-10	2.38945e-10	6.69045e-10	2.62839e-09	0.259638
N2	505	0.62	42	6	3	9	98	235	1.8185e-09	2.59786e-10	1.29893e-10	3.89679e-10	2.20818e-09	0.217021
N2	508	0.56	39	6	9	15	98.5	213.727	1.84725e-09	2.84193e-10	4.26289e-10	7.10482e-10	2.55773e-09	0.252658
N2	509	1.11	59	7	5	12	96.5	243	2.50886e-09	2.97661e-10	2.12615e-10	5.10277e-10	3.01914e-09	0.292181
N2	511	1.1	44	8	3	11	92.7	228.75	2.06904e-09	3.7619e-10	1.41071e-10	5.17261e-10	2.58631e-09	0.240437
N2	512	0.92	46	10	11	21	97.6	229.8	2.04511e-09	4.44588e-10	4.89047e-10	9.33636e-10	2.97874e-09	0.291558
N2	513	0.64	64	8	2	10	98	242	2.69089e-09	3.36362e-10	8.40904e-11	4.20452e-10	3.11135e-09	0.305785
N2	514	0.7	51	3	1	4	97.1	241	2.17316e-09	1.27833e-10	4.2611e-11	1.70444e-10	2.3436e-09	0.228216
N2	516	0.57	47	3	5	8	98.3	217.75	2.1895e-09	1.39755e-10	2.32925e-10	3.7268e-10	2.56218e-09	0.252583
N2	520	0.74	75	15	4	19	97.9	244	3.13074e-09	6.26148e-10	1.66973e-10	7.9312e-10	3.92386e-09	0.385246
N2	522	0.8	63	10	6	16	98.2	234.333	2.72994e-09	4.33324e-10	2.59994e-10	6.93318e-10	3.42326e-09	0.337127
N2	523	0.6	69	7	5	12	96.5	243	2.93409e-09	2.97661e-10	2.12615e-10	5.10277e-10	3.44437e-09	0.333333
N2	524	1	74	9	2	11	97.9	233.571	3.22691e-09	3.92462e-10	8.72139e-11	4.79676e-10	3.70659e-09	0.363914
N2	525	0.83	55	4	4	8	98.3	224.444	2.48575e-09	1.80782e-10	1.80782e-10	3.61564e-10	2.84732e-09	0.280693
N2	526	0.5	51	6	6	12	97.7	236	2.20557e-09	2.59479e-10	2.59479e-10	5.18959e-10	2.72453e-09	0.266949
N2	529	0.5	39	11	6	17	98.3	243	1.62803e-09	4.59188e-10	2.50466e-10	7.09655e-10	2.33769e-09	0.230453
N2	530	0.65	38	7	5	12	96.9	243	1.60921e-09	2.96433e-10	2.11738e-10	5.0817e-10	2.11738e-09	0.205761
N2	531	0.69	44	13	4	17	98.2	233	1.91753e-09	5.66544e-10	1.74321e-10	7.40866e-10	2.6584e-09	0.261803
N2	532	0.91	44	9	7	16	98.5	244	1.82551e-09	3.734e-10	2.90422e-10	6.63822e-10	2.48933e-09	0.245902
N2	536	0.87	56	5	9	14	98.1	238	2.39166e-09	2.13541e-10	3.84374e-10	5.97916e-10	2.98958e-09	0.294118
N2	537	0.8	54	8	10	18	98.4	243	2.25191e-09	3.33616e-10	4.1702e-10	7.50635e-10	3.00254e-09	0.296296
N2	540	0.69	49	10	4	14	97.7	194.222	2.5749e-09	5.2549e-10	2.10196e-10	7.35686e-10	3.31059e-09	0.324371
N2	541	0.87	43	7	5	12	97.7	237.5	1.84786e-09	3.00814e-10	2.14867e-10	5.15681e-10	2.36354e-09	0.231579
N2	542	1	48	5	6	11	98.2	243	2.00577e-09	2.08935e-10	2.50721e-10	4.59656e-10	2.46543e-09	0.242798
N2	543	0.5	51	11	7	18	98	243	2.13548e-09	4.60594e-10	2.93105e-10	7.53699e-10	2.88918e-09	0.283951
N2	544	0.55	68	8	7	15	97.9	241	2.87387e-09	3.38102e-10	2.9584e-10	6.33942e-10	3.50781e-09	0.344398
N2	545	0.82	62	12	3	15	97.8	244	2.59072e-09	5.0143e-10	1.25358e-10	6.26788e-10	3.21751e-09	0.315574
N2	546	0.66	68	10	5	15	98	242	2.85907e-09	4.20452e-10	2.10226e-10	6.30678e-10	3.48975e-09	0.342975
N2	547	0.71	48	9	5	14	98.6	242	2.00589e-09	3.76104e-10	2.08947e-10	5.85051e-10	2.59094e-09	0.256198
N2	548	0.82	40	5	2	7	97.7	186.333	2.19095e-09	2.73869e-10	1.09548e-10	3.83417e-10	2.57437e-09	0.252236
N2	550	1.52	53	4	3	7	98.3	227	2.3684e-09	1.78747e-10	1.3406e-10	3.12807e-10	2.6812e-09	0.264317
N2	551	1	40	8	4	12	98.2	243	1.67148e-09	3.34295e-10	1.67148e-10	5.01443e-10	2.17292e-09	0.213992
N2	552	2	42	6	4	10	97.5	241	1.78232e-09	2.54617e-10	1.69745e-10	4.24362e-10	2.20668e-09	0.215768
N2	553	0.78	41	10	3	13	98	232.286	1.79595e-09	4.38036e-10	1.31411e-10	5.69446e-10	2.36539e-09	0.232472
N2	554	0.63	57	9	4	13	97.9	237	2.44964e-09	3.86785e-10	1.71904e-10	5.58689e-10	3.00833e-09	0.295359
N2	555	0.71	53	14	5	19	97.5	243	2.23061e-09	5.89217e-10	2.10435e-10	7.99651e-10	3.03026e-09	0.296296
N2	556	0.59	43	7	3	10	98.2	244	1.78947e-09	2.9131e-10	1.24847e-10	4.16156e-10	2.20563e-09	0.217213
N2	558	0.64	54	3	3	6	98.3	234.2	2.3389e-09	1.29939e-10	1.29939e-10	2.59878e-10	2.59878e-09	0.256191
N2	563	0.71	58	9	7	16	98.3	237	2.48247e-09	3.85211e-10	2.99608e-10	6.84819e-10	3.16729e-09	0.312236
N2	565	0.96	49	15	4	19	98.2	237.667	2.09351e-09	6.40869e-10	1.70898e-10	8.11768e-10	2.90527e-09	0.286115
N2	566	0.45	58	6	5	11	98.6	244	2.40392e-09	2.48681e-10	2.07234e-10	4.55915e-10	2.85983e-09	0.282787
N2	567	0.82	51	6	5	11	97.9	226.071	2.29773e-09	2.70322e-10	2.25268e-10	4.9559e-10	2.79332e-09	0.27425
N2	569	0.91	42	10	3	13	98.2	237.6	1.79494e-09	4.27366e-10	1.2821e-10	5.55576e-10	2.35051e-09	0.231481
N2	572	0.51	80	19	4	23	96.2	212.45	3.90316e-09	9.27e-10	1.95158e-10	1.12216e-09	5.02532e-09	0.48482
N2	573	0.77	46	10	4	14	98.6	243	1.9144e-09	4.16174e-10	1.6647e-10	5.82643e-10	2.49704e-09	0.246914
N2	574	0.31	46	12	3	15	98	237	1.97488e-09	5.15187e-10	1.28797e-10	6.43984e-10	2.61887e-09	0.257384
N2	575	0.83	44	9	3	12	98.7	229.75	1.93481e-09	3.95756e-10	1.31919e-10	5.27675e-10	2.46248e-09	0.243743
N2	577	0.75	49	2	11	13	97.9	227.154	2.19711e-09	8.96778e-11	4.93228e-10	5.82906e-10	2.78001e-09	0.272943
N2	578	0.76	37	13	4	17	98	243	1.54927e-09	5.44338e-10	1.67489e-10	7.11827e-10	2.2611e-09	0.222222
N2	579	1.09	46	8	2	10	98.1	230.556	2.02802e-09	3.52698e-10	8.81746e-11	4.40873e-10	2.46889e-09	0.242892
N2	580	1	46	6	5	11	98.1	241	1.94013e-09	2.5306e-10	2.10883e-10	4.63943e-10	2.40407e-09	0.236515
N2	581	0.64	54	12	6	18	97.9	243	2.26341e-09	5.02979e-10	2.5149e-10	7.54469e-10	3.01788e-09	0.296296
N2	582	0.62	47	6	7	13	96.9	208.333	2.32152e-09	2.96365e-10	3.45759e-10	6.42124e-10	2.96365e-09	0.288
N2	584	0.93	52	5	4	9	98.2	244	2.16401e-09	2.08078e-10	1.66463e-10	3.74541e-10	2.53855e-09	0.25
N2	585	0.46	38	7	5	12	98.1	244	1.58301e-09	2.91606e-10	2.0829e-10	4.99897e-10	2.0829e-09	0.204918
N2	586	0.82	62	11	7	18	97.9	243	2.59873e-09	4.61064e-10	2.93405e-10	7.54469e-10	3.3532e-09	0.329218
N2	587	0.39	46	8	7	15	97.7	227.4	2.06458e-09	3.59057e-10	3.14175e-10	6.73231e-10	2.73781e-09	0.26825
N2	589	0.47	47	7	1	8	97.9	225.714	2.12087e-09	3.15874e-10	4.51249e-11	3.60999e-10	2.48187e-09	0.243671
N2	590	0.73	52	10	4	14	97.5	244	2.17955e-09	4.19144e-10	1.67658e-10	5.86802e-10	2.76635e-09	0.270492
N2	591	0.78	48	9	6	15	98.1	238.75	2.04356e-09	3.83167e-10	2.55445e-10	6.38612e-10	2.68217e-09	0.263874
N2	592	0.8	36	17	6	23	97.3	243	1.51824e-09	7.16948e-10	2.53041e-10	9.69989e-10	2.48823e-09	0.242798
N2	593	1.21	64	9	6	15	97.9	221.353	2.9449e-09	4.14126e-10	2.76084e-10	6.9021e-10	3.63511e-09	0.356896
N2	594	0.68	52	7	9	16	97.9	242	2.18858e-09	2.94617e-10	3.78793e-10	6.7341e-10	2.86199e-09	0.280992
N2	595	0.68	32	6	6	12	95.2	236.333	1.41823e-09	2.65918e-10	2.65918e-10	5.31835e-10	1.95006e-09	0.186178
N2	597	0.87	43	5	2	7	98.1	223	1.95998e-09	2.27905e-10	9.1162e-11	3.19067e-10	2.27905e-09	0.224215
N2	598	0.75	49	7	2	9	97.9	223	2.23803e-09	3.19719e-10	9.13483e-11	4.11067e-10	2.6491e-09	0.26009
Mev1	704	1.14	15	4	4	8	97.9	119	1.28387e-09	3.42364e-10	3.42364e-10	6.84728e-10	1.96859e-09	0.193277
Mev1	706	0.62	26	7	4	11	98.2	120	2.20008e-09	5.92329e-10	3.38474e-10	9.30803e-10	3.13088e-09	0.308333
Mev1	711	0.43	20	1	7	8	98	117	1.73931e-09	8.69653e-11	6.08757e-10	6.95722e-10	2.43503e-09	0.239316
Mev1	712	0.47	25	4	6	10	98.1	123	2.06597e-09	3.30555e-10	4.95833e-10	8.26388e-10	2.89236e-09	0.284553
Mev1	715	0.65	28	3	5	8	98	120	2.37415e-09	2.54374e-10	4.23956e-10	6.78329e-10	3.05248e-09	0.3
Mev1	721	1	18	3	2	5	97.8	123	1.49206e-09	2.48677e-10	1.65785e-10	4.14461e-10	1.90652e-09	0.186992
Mev1	727	1.2	22	5	8	13	98.2	116	1.9258e-09	4.37682e-10	7.00291e-10	1.13797e-09	3.06377e-09	0.301724
Mev1	729	0.69	22	5	3	8	98.1	124	1.80339e-09	4.09862e-10	2.45917e-10	6.55779e-10	2.45917e-09	0.241935
Mev1	733	1.75	22	8	4	12	98	121	1.84999e-09	6.72723e-10	3.36362e-10	1.00909e-09	2.85907e-09	0.280992
Mev1	737	0.78	16	3	4	7	98.2	107	1.51839e-09	2.84698e-10	3.79597e-10	6.64295e-10	2.18268e-09	0.214953
Mev1	738	0.38	18	7	1	8	98.2	123	1.48598e-09	5.77882e-10	8.25546e-11	6.60437e-10	2.14642e-09	0.211382
Mev1	744	0.75	21	5	4	9	98.2	121	1.7623e-09	4.19596e-10	3.35677e-10	7.55272e-10	2.51757e-09	0.247934
Mev1	746	0.58	19	2	3	5	97.8	117	1.65572e-09	1.74286e-10	2.61429e-10	4.35716e-10	2.09144e-09	0.205128
Mev1	748	0.69	22	2	2	4	98	119	1.88108e-09	1.71007e-10	1.71007e-10	3.42015e-10	2.2231e-09	0.218487
Mev1	749	0.18	20	5	3	8	97.4	120	1.70627e-09	4.26567e-10	2.5594e-10	6.82508e-10	2.38878e-09	0.233333
Mev1	752	0.83	22	7	5	12	98.4	112	1.99052e-09	6.33349e-10	4.52392e-10	1.08574e-09	3.07627e-09	0.303571
Mev1	753	0.79	25	6	0	6	97.5	120	2.13065e-09	5.11356e-10	0	5.11356e-10	2.64201e-09	0.258333
Mev1	759	0.58	30	6	3	9	98.1	118	2.58421e-09	5.16842e-10	2.58421e-10	7.75264e-10	3.35948e-09	0.330508
Mev1	761	0.33	28	6	1	7	97.5	121	2.36661e-09	5.0713e-10	8.45217e-11	5.91652e-10	2.95826e-09	0.289256
Mev1	767	0.64	23	2	6	8	98.1	119	1.96458e-09	1.70833e-10	5.12499e-10	6.83332e-10	2.64791e-09	0.260504
Mev1	769	0.64	23	2	2	4	98.1	110	2.12532e-09	1.8481e-10	1.8481e-10	3.69621e-10	2.49494e-09	0.245455
Mev1	770	0.57	22	5	5	10	98.2	123	1.8162e-09	4.12773e-10	4.12773e-10	8.25546e-10	2.64175e-09	0.260163
Mev1	1730	1.1	21	5	3	8	98.1	117	1.82441e-09	4.34383e-10	2.6063e-10	6.95013e-10	2.51942e-09	0.247863

## Sheet: Readme
The four preceding worksheets show the results for individual MA lines nuclear mutation rates. The first worksheet is for N2 MA lines, the second for mev-1 MA lines, the third for PB306 MA lines and the fourth one is for all the MA lines in a separate worksheet.
Column heading	Explanation
Lines	name of lines
Ts/Tv	transition to transversion ratio
SNP	number of base-substitution
DEL	number of deletions
INS	number of insertions
INDELs	number of indels
%_bases_above_3	Percentage genome covered > 3x
Ngen	number of generations
SNPs MR	base substitution mutation rate
DEL MR	deletion mutation rate
INS MR	insertion mutation rate
INDELs MR	indels mutation rate
Total MR	total mutation rate
µGENOME	genome-wide mutation rate per-generation
