# Supplementary material for: Mutability of mononucleotide repeats, not oxidative stress, explains the discrepancy between laboratory-accumulated mutations and the natural allele-frequency spectrum in C. elegans
Source: HighWire-hosted journal article supplement (doi:10.1101/gr.275372.121), 2021-08-17
Supplement: Supplemental_Table_S4.xlsx.xlsx [file Supplemental_Table_S4.xlsx.xlsx]

## Sheet: mev_BS
Line	CHROM	POS	REF	ALT	type	putative effect	Gene annotation
1730	I	796319	G	A	downstream_gene_variant	MODIFIER	Y73A3A.1
1730	I	3245607	G	T	missense_variant	MODERATE	mab-31
1730	II	2436016	A	T	intergenic_region	MODIFIER	ceh-86-F42G2.10
1730	II	10273122	G	A	upstream_gene_variant	MODIFIER	F54B3.2
1730	III	2049817	G	T	upstream_gene_variant	MODIFIER	dpy-1
1730	III	2740131	T	C	upstream_gene_variant	MODIFIER	Y71H2AM.13
1730	III	5896332	G	A	upstream_gene_variant	MODIFIER	pxl-1
1730	IV	659846	C	T	downstream_gene_variant	MODIFIER	K11H12.8
1730	IV	2789909	A	G	upstream_gene_variant	MODIFIER	atln-1
1730	IV	3717820	G	A	synonymous_variant	LOW	Y37E11AM.3
1730	IV	13308002	A	T	downstream_gene_variant	MODIFIER	csn-6
1730	IV	14266516	G	A	upstream_gene_variant	MODIFIER	21ur-10968
1730	V	953110	T	A	upstream_gene_variant	MODIFIER	Y50D4C.6
1730	V	5309147	T	G	missense_variant	MODERATE	ncx-2
1730	V	5412989	C	T	upstream_gene_variant	MODIFIER	F08F3.10
1730	V	6945513	C	A	upstream_gene_variant	MODIFIER	Y57E12B.1
1730	V	9004473	A	T	upstream_gene_variant	MODIFIER	srx-3
1730	V	12629339	G	A	synonymous_variant	LOW	F56H9.6
1730	V	13791805	T	A	upstream_gene_variant	MODIFIER	F53C11.4
1730	V	19022809	A	T	upstream_gene_variant	MODIFIER	Y39B6A.25
1730	V	20269670	G	A	missense_variant	MODERATE	prmt-1
704	I	2708556	C	A	upstream_gene_variant	MODIFIER	lin-17
704	II	3571744	G	A	missense_variant	MODERATE	clec-129
704	III	4530067	G	A	synonymous_variant	LOW	cdh-4
704	III	8975597	A	T	3_prime_UTR_variant	MODIFIER	pde-2
704	IV	4576545	C	A	upstream_gene_variant	MODIFIER	F28E10.6
704	IV	11010954	C	G	missense_variant	MODERATE	ndx-9
704	IV	13523913	G	A	upstream_gene_variant	MODIFIER	dcap-2
704	IV	16772969	A	C	upstream_gene_variant	MODIFIER	Y43D4A.8
704	V	2594519	C	T	downstream_gene_variant	MODIFIER	C29G2.2
704	V	2910698	A	T	upstream_gene_variant	MODIFIER	C31B8.8
704	V	5371395	C	T	upstream_gene_variant	MODIFIER	T09D3.9
704	V	9044510	C	T	upstream_gene_variant	MODIFIER	nhr-30
704	V	14984864	C	T	upstream_gene_variant	MODIFIER	F02D8.4
704	X	3504608	C	G	missense_variant	MODERATE	C12D12.1
704	X	16726626	C	T	upstream_gene_variant	MODIFIER	T21F2.3
706	I	3418401	C	T	upstream_gene_variant	MODIFIER	K03E5.2
706	I	5021021	A	T	missense_variant	MODERATE	C46H11.6
706	I	8510732	T	A	upstream_gene_variant	MODIFIER	axl-1
706	II	1068193	A	T	upstream_gene_variant	MODIFIER	K02E7.10
706	II	3892969	C	T	synonymous_variant	LOW	F53C3.8
706	II	6006103	A	T	upstream_gene_variant	MODIFIER	ZK84.14
706	II	6283399	C	T	missense_variant	MODERATE	F13H8.1
706	III	2788001	A	G	3_prime_UTR_variant	MODIFIER	Y71H2AM.4
706	III	3458289	G	C	missense_variant	MODERATE	C34C12.2
706	III	11311152	C	A	downstream_gene_variant	MODIFIER	teg-1
706	III	13018021	A	C	upstream_gene_variant	MODIFIER	F14F7.t1
706	IV	4484374	C	T	upstream_gene_variant	MODIFIER	M01H9.4
706	IV	4672194	A	T	upstream_gene_variant	MODIFIER	F29B9.14
706	IV	6336027	T	A	5_prime_UTR_variant	MODIFIER	mif-4
706	IV	6954185	T	A	upstream_gene_variant	MODIFIER	21ur-9097
706	IV	8268325	A	T	synonymous_variant	LOW	K07H8.8
706	IV	14017990	T	C	upstream_gene_variant	MODIFIER	Y37A1B.t1
706	V	4287173	T	C	synonymous_variant	LOW	srt-19
706	V	18196340	C	T	splice_region_variant&synonymous_variant	LOW	F16H6.3
706	V	20753772	A	T	upstream_gene_variant	MODIFIER	F38A6.7
706	X	3654361	A	T	upstream_gene_variant	MODIFIER	sax-1
706	X	7833298	T	A	intron_variant	MODIFIER	sul-3
706	X	8784112	A	C	upstream_gene_variant	MODIFIER	ZK721.3
706	X	10905335	T	G	3_prime_UTR_variant	MODIFIER	F47B10.8
706	X	13675253	T	C	upstream_gene_variant	MODIFIER	C04A11.7
706	X	14258854	T	C	upstream_gene_variant	MODIFIER	E02H4.5
711	I	3152412	A	T	upstream_gene_variant	MODIFIER	lpd-6
711	I	6388187	A	G	downstream_gene_variant	MODIFIER	gld-2
711	I	12177048	T	A	upstream_gene_variant	MODIFIER	R05D7.6
711	I	12366464	G	T	splice_donor_variant&intron_variant	HIGH	T09E11.6
711	II	5473751	G	C	3_prime_UTR_variant	MODIFIER	clr-1
711	II	9887423	G	C	synonymous_variant	LOW	C08H9.2
711	III	5834063	G	T	missense_variant	MODERATE	R12B2.6
711	III	7941785	A	C	synonymous_variant	LOW	kle-2
711	III	13688880	G	A	synonymous_variant	LOW	cul-2
711	IV	666218	T	A	upstream_gene_variant	MODIFIER	K11H12.6
711	IV	1338203	C	T	upstream_gene_variant	MODIFIER	F58F6.6
711	IV	3212088	C	G	upstream_gene_variant	MODIFIER	puf-4
711	IV	3823296	T	A	upstream_gene_variant	MODIFIER	bris-1
711	IV	10328589	C	T	upstream_gene_variant	MODIFIER	unc-43
711	V	826372	T	A	upstream_gene_variant	MODIFIER	srx-31
711	V	14093554	G	A	missense_variant	MODERATE	D1086.3
711	V	17640018	C	T	downstream_gene_variant	MODIFIER	fbxa-192
711	X	8585954	G	T	upstream_gene_variant	MODIFIER	F18E9.11
711	X	13620514	A	T	downstream_gene_variant	MODIFIER	Y12A6A.2
711	X	17371719	T	A	upstream_gene_variant	MODIFIER	F10D7.2
712	I	1538126	A	T	intron_variant	MODIFIER	Y92H12A.4
712	I	4048544	C	A	upstream_gene_variant	MODIFIER	C09D1.4
712	I	4096306	A	G	missense_variant	MODERATE	acd-2
712	I	9287867	G	A	missense_variant	MODERATE	prom-1
712	I	10699109	G	A	downstream_gene_variant	MODIFIER	C34B2.11
712	I	11630109	A	T	stop_gained	HIGH	W04G5.4
712	I	12124054	T	A	upstream_gene_variant	MODIFIER	M01G12.6
712	I	13143501	A	G	synonymous_variant	LOW	F22G12.7
712	II	1500541	G	A	upstream_gene_variant	MODIFIER	emc-1
712	II	4792577	T	C	missense_variant	MODERATE	F26G1.1
712	II	9781170	C	T	synonymous_variant	LOW	cyp-13A1
712	III	2492612	A	T	downstream_gene_variant	MODIFIER	Y54F10AL.1
712	III	3941241	G	C	intergenic_region	MODIFIER	nlp-10-F37A8.7
712	III	4085216	T	G	missense_variant	MODERATE	kin-19
712	IV	232361	G	C	upstream_gene_variant	MODIFIER	R02D3.3
712	IV	8932036	T	G	upstream_gene_variant	MODIFIER	D1046.4
712	V	4283340	C	A	upstream_gene_variant	MODIFIER	srt-20
712	V	5223738	T	A	upstream_gene_variant	MODIFIER	Y49G5B.3
712	V	19281447	A	C	upstream_gene_variant	MODIFIER	F21D9.8
712	V	19492412	T	A	upstream_gene_variant	MODIFIER	Y43F8B.6
712	V	19874504	A	T	upstream_gene_variant	MODIFIER	Y116F11B.11
712	X	1108780	A	T	upstream_gene_variant	MODIFIER	C05D9.11
712	X	9661803	G	T	upstream_gene_variant	MODIFIER	T14B1.5
712	X	16332245	T	A	upstream_gene_variant	MODIFIER	taf-3
712	X	16350783	C	T	upstream_gene_variant	MODIFIER	nhr-28
715	I	4245134	A	T	upstream_gene_variant	MODIFIER	ndx-7
715	I	13524362	C	A	downstream_gene_variant	MODIFIER	Y87G2A.25
715	II	5648593	G	A	missense_variant	MODERATE	F59E12.11
715	II	8779684	G	T	missense_variant	MODERATE	let-19
715	II	9276358	C	G	missense_variant	MODERATE	C01G6.5
715	II	10987419	C	T	upstream_gene_variant	MODIFIER	C09D8.3
715	II	11927474	C	T	upstream_gene_variant	MODIFIER	Y17G7A.3
715	II	13007319	T	A	downstream_gene_variant	MODIFIER	F18A11.5
715	II	14323941	A	C	downstream_gene_variant	MODIFIER	Y54G11A.14
715	II	14323951	A	G	downstream_gene_variant	MODIFIER	Y54G11A.14
715	II	14323953	T	C	downstream_gene_variant	MODIFIER	Y54G11A.14
715	II	15193473	A	T	upstream_gene_variant	MODIFIER	Y46E12BR.1
715	III	1844670	G	A	upstream_gene_variant	MODIFIER	pqn-82
715	III	1960762	C	T	upstream_gene_variant	MODIFIER	R155.6
715	III	4807744	G	A	synonymous_variant	LOW	pal-1
715	III	7526332	T	G	upstream_gene_variant	MODIFIER	C07H6.11
715	III	8183228	C	A	missense_variant	MODERATE	C50C3.2
715	III	11194383	G	T	intron_variant	MODIFIER	tra-1
715	III	11346418	T	A	missense_variant	MODERATE	T28D6.7
715	IV	2276949	C	A	upstream_gene_variant	MODIFIER	M70.5
715	IV	10021567	G	A	upstream_gene_variant	MODIFIER	F44D12.19
715	IV	10335170	A	T	upstream_gene_variant	MODIFIER	K11E8.7
715	V	1866647	A	T	upstream_gene_variant	MODIFIER	linc-137
715	V	5429129	G	A	missense_variant	MODERATE	rhr-1
715	V	11985052	C	G	upstream_gene_variant	MODIFIER	rpt-1
715	V	20133922	T	G	upstream_gene_variant	MODIFIER	ssu-1
715	V	20271632	C	A	upstream_gene_variant	MODIFIER	mdt-17
715	X	8199833	T	C	upstream_gene_variant	MODIFIER	C17H11.8
721	I	548014	T	A	upstream_gene_variant	MODIFIER	ptr-21
721	I	2276595	C	A	upstream_gene_variant	MODIFIER	abt-2
721	I	6576913	G	A	upstream_gene_variant	MODIFIER	F57B10.18
721	III	2156285	C	T	downstream_gene_variant	MODIFIER	frl-1
721	III	4865981	T	A	upstream_gene_variant	MODIFIER	C35D10.10
721	III	12323935	G	T	upstream_gene_variant	MODIFIER	zip-12
721	III	12323938	G	T	upstream_gene_variant	MODIFIER	zip-12
721	IV	9677128	T	A	upstream_gene_variant	MODIFIER	nhr-34
721	IV	10328714	T	G	upstream_gene_variant	MODIFIER	unc-43
721	V	781618	T	C	missense_variant	MODERATE	srbc-60
721	V	3962418	C	T	missense_variant	MODERATE	cyp-34A7
721	V	10919415	G	A	missense_variant	MODERATE	nas-31
721	V	14009357	C	T	missense_variant	MODERATE	ddx-17
721	V	16868268	T	C	downstream_gene_variant	MODIFIER	clec-24
721	X	4688977	T	G	synonymous_variant	LOW	K02G10.5
721	X	9116298	G	A	synonymous_variant	LOW	C25A11.2
721	X	10013494	T	A	upstream_gene_variant	MODIFIER	F19C6.3
721	X	14024721	C	T	upstream_gene_variant	MODIFIER	C04C11.15
727	II	575665	G	C	upstream_gene_variant	MODIFIER	mlt-8
727	II	1133979	T	C	missense_variant	MODERATE	W09B6.4
727	II	8423777	T	A	upstream_gene_variant	MODIFIER	F14E5.7
727	III	10173039	G	A	missense_variant	MODERATE	mua-3
727	IV	24039	T	G	upstream_gene_variant	MODIFIER	trpl-4
727	IV	10368732	T	A	upstream_gene_variant	MODIFIER	sir-2.1
727	V	1061555	A	G	upstream_gene_variant	MODIFIER	str-224
727	V	4441685	G	A	missense_variant	MODERATE	rft-1
727	V	4680569	C	T	upstream_gene_variant	MODIFIER	K03B4.6
727	V	9476475	A	G	upstream_gene_variant	MODIFIER	K06A4.11
727	V	11530125	G	A	upstream_gene_variant	MODIFIER	C55A6.20
727	V	12856656	C	A	upstream_gene_variant	MODIFIER	C44H9.7
727	V	14152286	A	C	upstream_gene_variant	MODIFIER	AH10.9
727	V	16323112	G	T	upstream_gene_variant	MODIFIER	F57G8.14
727	X	624776	T	A	upstream_gene_variant	MODIFIER	unc-96
727	X	1363908	C	T	splice_acceptor_variant&intron_variant	HIGH	F56C3.5
727	X	2068008	G	A	synonymous_variant	LOW	acl-4
727	X	3635155	G	A	upstream_gene_variant	MODIFIER	gst-11
727	X	8148813	G	A	upstream_gene_variant	MODIFIER	F22F1.t1
727	X	12412873	C	A	missense_variant	MODERATE	lin-2
727	X	15020669	T	A	downstream_gene_variant	MODIFIER	C18B12.10
727	X	16580467	T	C	upstream_gene_variant	MODIFIER	K08B5.6
729	I	616515	T	A	upstream_gene_variant	MODIFIER	F56A6.6
729	I	1348974	T	A	upstream_gene_variant	MODIFIER	K12C11.1
729	I	7144935	G	A	upstream_gene_variant	MODIFIER	K10D3.4
729	II	406948	T	C	upstream_gene_variant	MODIFIER	C24H12.15
729	III	1139966	T	G	upstream_gene_variant	MODIFIER	lgc-46
729	III	8535404	G	T	upstream_gene_variant	MODIFIER	trp-1
729	III	9334275	C	T	upstream_gene_variant	MODIFIER	C40H1.3
729	IV	2644717	A	T	upstream_gene_variant	MODIFIER	mdf-2
729	IV	3177826	T	A	upstream_gene_variant	MODIFIER	Y67D8B.4
729	IV	6223257	A	G	upstream_gene_variant	MODIFIER	21ur-7234
729	IV	6288963	T	A	upstream_gene_variant	MODIFIER	ops-1
729	IV	12780821	A	C	upstream_gene_variant	MODIFIER	ZK897.2
729	IV	13252159	A	T	upstream_gene_variant	MODIFIER	ttr-45
729	IV	13526020	C	T	missense_variant	MODERATE	rsd-2
729	V	65444	A	G	3_prime_UTR_variant	MODIFIER	daam-1
729	V	10978096	G	T	missense_variant	MODERATE	fig-1
729	V	18627220	T	C	upstream_gene_variant	MODIFIER	Y69H2.1
729	V	20129614	T	A	upstream_gene_variant	MODIFIER	Y113G7A.t4
729	V	20497079	C	T	missense_variant	MODERATE	B0250.5
729	X	3709009	G	C	upstream_gene_variant	MODIFIER	C01C4.3
729	X	3814949	A	G	upstream_gene_variant	MODIFIER	K03C7.13
729	X	6577031	G	C	upstream_gene_variant	MODIFIER	T28B4.10
733	I	1005898	T	C	upstream_gene_variant	MODIFIER	C54G6.2
733	I	1441992	G	A	upstream_gene_variant	MODIFIER	F37F2.4
733	I	3347276	A	C	intron_variant	MODIFIER	Y44E3A.6
733	I	8943807	G	C	upstream_gene_variant	MODIFIER	madd-4
733	II	3620585	G	A	upstream_gene_variant	MODIFIER	M151.7
733	II	8109919	A	G	missense_variant	MODERATE	lron-4
733	III	680900	C	T	missense_variant	MODERATE	W02B3.4
733	III	1971369	G	A	missense_variant	MODERATE	R155.3
733	III	2516406	C	A	downstream_gene_variant	MODIFIER	Y54F10AM.6
733	III	4581675	A	C	3_prime_UTR_variant	MODIFIER	wdr-48
733	IV	5171532	G	A	upstream_gene_variant	MODIFIER	21ur-270
733	IV	6407075	T	A	upstream_gene_variant	MODIFIER	sfrp-1
733	V	408870	A	G	downstream_gene_variant	MODIFIER	nhr-252
733	V	2165200	C	A	synonymous_variant	LOW	srbc-19
733	V	14235581	G	A	downstream_gene_variant	MODIFIER	K02E11.t1
733	V	16075829	G	A	synonymous_variant	LOW	srj-29
733	V	20489148	T	C	missense_variant	MODERATE	srbc-78
733	X	1153477	T	G	missense_variant	MODERATE	R193.3
733	X	1153483	G	A	synonymous_variant	LOW	R193.3
733	X	1153496	T	C	missense_variant	MODERATE	R193.3
733	X	7014291	A	T	upstream_gene_variant	MODIFIER	R173.8
733	X	15912442	G	A	synonymous_variant	LOW	npr-33
737	I	265423	C	G	upstream_gene_variant	MODIFIER	T13E5.1
737	I	2389512	C	A	intron_variant	MODIFIER	dot-1.1
737	I	5336852	A	T	upstream_gene_variant	MODIFIER	spe-11
737	I	7966233	C	T	upstream_gene_variant	MODIFIER	T22C1.12
737	II	5715849	T	A	upstream_gene_variant	MODIFIER	tiar-1
737	II	7735857	T	G	missense_variant	MODERATE	cpna-2
737	II	9159925	G	T	upstream_gene_variant	MODIFIER	rhy-1
737	III	1360196	G	T	upstream_gene_variant	MODIFIER	Y82E9BL.1
737	III	5887414	T	A	missense_variant	MODERATE	C28H8.8
737	III	10782753	T	G	upstream_gene_variant	MODIFIER	Y39A1B.7
737	IV	4266602	G	A	upstream_gene_variant	MODIFIER	F36A4.4
737	V	4899044	T	C	synonymous_variant	LOW	ugt-10
737	V	8316810	A	G	upstream_gene_variant	MODIFIER	clec-219
737	X	2997034	C	T	upstream_gene_variant	MODIFIER	21ur-12946
737	X	7482663	A	G	upstream_gene_variant	MODIFIER	K08A8.4
737	X	15936870	T	C	intron_variant	MODIFIER	mrp-3
738	I	5765589	A	T	upstream_gene_variant	MODIFIER	ccpp-1
738	I	7711588	C	T	upstream_gene_variant	MODIFIER	lsy-22
738	I	8265650	A	C	upstream_gene_variant	MODIFIER	ZK265.13
738	II	895814	C	A	downstream_gene_variant	MODIFIER	T07D3.9
738	II	3693038	A	T	upstream_gene_variant	MODIFIER	F40H7.12
738	II	8499347	G	T	upstream_gene_variant	MODIFIER	T13H5.1
738	III	11250180	G	T	missense_variant	MODERATE	rsks-1
738	III	13640988	A	C	upstream_gene_variant	MODIFIER	T12D8.11
738	IV	600833	G	A	missense_variant	MODERATE	srt-59
738	IV	2343182	C	T	intron_variant	MODIFIER	ppgn-1
738	IV	10521605	C	A	upstream_gene_variant	MODIFIER	cal-4
738	IV	11133165	T	A	upstream_gene_variant	MODIFIER	anr-13
738	IV	11707332	T	A	upstream_gene_variant	MODIFIER	T22B3.3
738	V	419455	G	T	upstream_gene_variant	MODIFIER	dod-19
738	V	17662981	C	A	upstream_gene_variant	MODIFIER	fbxa-108
738	X	5801907	T	C	upstream_gene_variant	MODIFIER	F46G11.4
738	X	7735377	G	A	upstream_gene_variant	MODIFIER	K09F5.1
738	X	16607669	C	G	upstream_gene_variant	MODIFIER	F59C12.4
744	I	9725231	G	A	upstream_gene_variant	MODIFIER	C16C2.7
744	I	10176180	C	G	upstream_gene_variant	MODIFIER	C25A1.4
744	II	458064	T	C	upstream_gene_variant	MODIFIER	W10D9.2
744	II	10565027	C	T	missense_variant	MODERATE	C06A1.7
744	III	819332	T	A	upstream_gene_variant	MODIFIER	clec-149
744	III	1139291	T	A	upstream_gene_variant	MODIFIER	lgc-46
744	III	2282045	C	T	downstream_gene_variant	MODIFIER	fbxa-39
744	III	12420299	A	T	intron_variant	MODIFIER	tat-1
744	III	13432683	G	C	upstream_gene_variant	MODIFIER	bli-5
744	IV	2193365	G	C	upstream_gene_variant	MODIFIER	Y71G10AR.5
744	IV	4464488	G	A	upstream_gene_variant	MODIFIER	R08C7.18
744	IV	5006978	A	T	upstream_gene_variant	MODIFIER	21ur-14794
744	IV	13537986	G	A	intron_variant	MODIFIER	rsd-2
744	IV	16174310	T	A	upstream_gene_variant	MODIFIER	gln-3
744	V	7446812	A	T	upstream_gene_variant	MODIFIER	F25E5.5
744	V	13272433	C	A	upstream_gene_variant	MODIFIER	F32F2.2
744	V	20650545	A	G	upstream_gene_variant	MODIFIER	mnr-1
744	X	4426713	T	A	upstream_gene_variant	MODIFIER	F15A8.3
744	X	4720547	G	A	missense_variant	MODERATE	F55D10.4
744	X	9738479	A	G	upstream_gene_variant	MODIFIER	F15G9.5
744	X	16223285	C	G	downstream_gene_variant	MODIFIER	F23A7.3
746	II	3825980	G	T	upstream_gene_variant	MODIFIER	F54D10.7
746	II	4631430	T	A	missense_variant	MODERATE	che-10
746	II	6367114	T	C	synonymous_variant	LOW	K10B2.2
746	II	13769042	T	C	upstream_gene_variant	MODIFIER	C01B9.7
746	II	13791363	C	A	upstream_gene_variant	MODIFIER	C01B9.6
746	III	4198480	G	A	upstream_gene_variant	MODIFIER	asd-1
746	III	5519043	T	A	upstream_gene_variant	MODIFIER	nekl-4
746	III	12792464	G	T	missense_variant	MODERATE	lgc-37
746	IV	2771998	C	A	upstream_gene_variant	MODIFIER	Y54G2A.11
746	IV	6652498	T	A	upstream_gene_variant	MODIFIER	C01B10.49
746	IV	8044684	A	C	upstream_gene_variant	MODIFIER	C26B2.14
746	V	479556	C	A	synonymous_variant	LOW	nhr-55
746	V	1549903	T	A	synonymous_variant	LOW	F52F10.2
746	V	6039688	C	T	missense_variant	MODERATE	F29G9.1
746	V	12516714	C	T	upstream_gene_variant	MODIFIER	T28H10.2
746	V	19627287	A	T	upstream_gene_variant	MODIFIER	Y43F8C.3
746	X	1403186	T	C	upstream_gene_variant	MODIFIER	ZK402.5
746	X	9609004	T	A	upstream_gene_variant	MODIFIER	C11E4.16
746	X	14965514	T	C	upstream_gene_variant	MODIFIER	F45B8.3
748	I	3448918	A	G	missense_variant	MODERATE	tag-63
748	I	8979877	C	T	missense_variant	MODERATE	fasn-1
748	II	8527150	A	G	synonymous_variant	LOW	T13H5.6
748	II	10791562	A	C	downstream_gene_variant	MODIFIER	cdl-1
748	III	2720026	T	A	upstream_gene_variant	MODIFIER	Y71H2AM.10
748	III	3048956	T	C	upstream_gene_variant	MODIFIER	cutl-25
748	IV	2740602	T	A	upstream_gene_variant	MODIFIER	nhr-277
748	IV	3296297	G	A	missense_variant	MODERATE	W08E12.7
748	IV	3911853	G	T	missense_variant	MODERATE	F56D6.18
748	IV	5703772	C	T	upstream_gene_variant	MODIFIER	perm-5
748	IV	9322382	A	T	3_prime_UTR_variant	MODIFIER	vha-17
748	IV	15648063	G	C	upstream_gene_variant	MODIFIER	Y105C5A.1268
748	IV	15815423	T	A	upstream_gene_variant	MODIFIER	21ur-786
748	IV	17302513	C	G	upstream_gene_variant	MODIFIER	ifta-2
748	V	360788	A	T	upstream_gene_variant	MODIFIER	mltn-6
748	V	7065072	T	C	upstream_gene_variant	MODIFIER	Y57E12AL.6
748	V	13916789	C	A	missense_variant	MODERATE	str-252
748	V	16256183	T	A	upstream_gene_variant	MODIFIER	gcy-20
748	X	585516	G	A	intron_variant	MODIFIER	mrp-1
748	X	3967993	C	T	upstream_gene_variant	MODIFIER	C16B8.2
748	X	7744538	T	G	upstream_gene_variant	MODIFIER	ref-2
748	X	14272868	A	T	upstream_gene_variant	MODIFIER	E02H4.9
749	I	2868945	T	A	upstream_gene_variant	MODIFIER	Y71F9AL.21
749	I	13491151	C	A	3_prime_UTR_variant	MODIFIER	Y48G10A.1
749	II	2352755	G	A	upstream_gene_variant	MODIFIER	F43C11.10
749	II	5629525	T	A	5_prime_UTR_variant	MODIFIER	F59E12.6
749	II	9004434	C	A	upstream_gene_variant	MODIFIER	F44G4.5
749	II	9893442	T	A	upstream_gene_variant	MODIFIER	C08H9.2
749	II	14262094	C	A	intron_variant	MODIFIER	Y54G11A.1
749	II	14270291	C	T	upstream_gene_variant	MODIFIER	Y54G11A.1
749	II	14531028	A	T	upstream_gene_variant	MODIFIER	F57C2.5
749	III	296879	G	T	upstream_gene_variant	MODIFIER	Y50D7A.12
749	III	4533271	C	A	missense_variant	MODERATE	cdh-4
749	III	9221205	T	A	downstream_gene_variant	MODIFIER	rnr-1
749	IV	757305	G	T	missense_variant&splice_region_variant	MODERATE	srt-23
749	IV	1736552	A	T	downstream_gene_variant	MODIFIER	Y41D4A.6
749	IV	3552190	G	A	missense_variant&splice_region_variant	MODERATE	B0212.t1
749	IV	4334784	C	A	upstream_gene_variant	MODIFIER	oac-51
749	V	2189042	C	G	upstream_gene_variant	MODIFIER	nhr-13
749	V	15297029	C	A	missense_variant	MODERATE	cpr-3
749	X	10088916	A	T	upstream_gene_variant	MODIFIER	W07E11.7
749	X	12574951	C	G	upstream_gene_variant	MODIFIER	T24D5.8
752	I	1631159	A	C	upstream_gene_variant	MODIFIER	bre-4
752	I	1841356	T	A	3_prime_UTR_variant	MODIFIER	egl-30
752	I	7334297	C	T	upstream_gene_variant	MODIFIER	glb-18
752	I	8669607	G	A	synonymous_variant	LOW	K07A12.1
752	III	2568154	A	T	upstream_gene_variant	MODIFIER	Y54F10AM.11
752	III	3876372	C	T	upstream_gene_variant	MODIFIER	tir-1
752	III	5164158	A	T	synonymous_variant	LOW	T10F2.2
752	III	6882479	T	A	upstream_gene_variant	MODIFIER	med-2
752	III	11404639	C	T	upstream_gene_variant	MODIFIER	Y47D3B.4
752	IV	1620210	C	A	missense_variant	MODERATE	nhr-92
752	IV	3604876	G	A	missense_variant	MODERATE	Y37E11B.10
752	IV	5481133	A	T	upstream_gene_variant	MODIFIER	T11F8.4
752	IV	5481136	A	T	upstream_gene_variant	MODIFIER	T11F8.4
752	IV	11756482	C	A	3_prime_UTR_variant	MODIFIER	T12A7.2
752	IV	12857193	G	A	upstream_gene_variant	MODIFIER	gcy-18
752	IV	13519406	G	A	upstream_gene_variant	MODIFIER	dcap-2
752	V	135046	T	A	upstream_gene_variant	MODIFIER	W03F9.3
752	V	9650005	G	A	synonymous_variant	LOW	hcp-2
752	X	3081515	G	A	upstream_gene_variant	MODIFIER	F52E4.10
752	X	10434116	G	T	upstream_gene_variant	MODIFIER	ZC504.10
752	X	10526967	T	C	missense_variant	MODERATE	git-1
752	X	17433849	A	T	upstream_gene_variant	MODIFIER	C36E6.1
753	I	2338792	T	A	upstream_gene_variant	MODIFIER	zeel-1
753	I	4749194	G	C	upstream_gene_variant	MODIFIER	let-502
753	I	8119508	C	T	upstream_gene_variant	MODIFIER	lin-10
753	I	8866851	C	T	upstream_gene_variant	MODIFIER	F55H12.7
753	I	11278085	T	C	upstream_gene_variant	MODIFIER	F36D1.9
753	II	2201254	T	A	downstream_gene_variant	MODIFIER	C33C12.1
753	II	10590196	A	C	missense_variant	MODERATE	crn-3
753	II	12159878	G	C	synonymous_variant	LOW	Y57A10A.7
753	II	12632782	C	A	stop_gained	HIGH	Y38E10A.17
753	III	4710648	C	T	synonymous_variant	LOW	T04A8.18
753	III	7296025	G	A	downstream_gene_variant	MODIFIER	B0361.9
753	III	7795469	T	A	upstream_gene_variant	MODIFIER	cyk-7
753	III	13047581	C	A	missense_variant	MODERATE	F54F12.2
753	V	4851365	G	A	upstream_gene_variant	MODIFIER	nex-4
753	V	4897354	C	T	missense_variant	MODERATE	ugt-9
753	V	5029431	A	G	3_prime_UTR_variant	MODIFIER	swt-7
753	V	19043302	A	C	missense_variant	MODERATE	asp-15
753	V	19285504	A	T	upstream_gene_variant	MODIFIER	fbxb-57
753	X	2628142	T	C	intron_variant	MODIFIER	F54G2.1
753	X	5559126	T	A	upstream_gene_variant	MODIFIER	C54G7.13
753	X	5601187	A	T	upstream_gene_variant	MODIFIER	sulp-2
753	X	6484353	A	T	upstream_gene_variant	MODIFIER	C15B12.12
753	X	13782378	T	A	upstream_gene_variant	MODIFIER	F55F3.8
753	X	15342560	C	T	upstream_gene_variant	MODIFIER	Y15E3A.7
753	X	16977423	A	G	upstream_gene_variant	MODIFIER	F52G3.5
759	I	1314495	G	T	upstream_gene_variant	MODIFIER	dapk-1
759	I	2681293	C	G	upstream_gene_variant	MODIFIER	F32B5.13
759	I	4406040	T	C	upstream_gene_variant	MODIFIER	tiam-1
759	I	6695126	G	A	upstream_gene_variant	MODIFIER	ckr-1
759	I	13735786	T	A	upstream_gene_variant	MODIFIER	lagr-1
759	II	10902059	C	A	missense_variant	MODERATE	gly-1
759	II	12066973	T	C	splice_region_variant&intron_variant	LOW	arrd-8
759	II	13666154	C	A	upstream_gene_variant	MODIFIER	C31C9.6
759	III	153010	C	T	missense_variant	MODERATE	T17A3.9
759	III	884280	C	G	missense_variant	MODERATE	zer-1
759	III	1306829	C	T	splice_region_variant&intron_variant	LOW	fbxa-79
759	III	9929894	C	A	upstream_gene_variant	MODIFIER	ttr-3
759	III	11977634	C	A	missense_variant	MODERATE	Y56A3A.30
759	III	12060615	A	C	upstream_gene_variant	MODIFIER	arx-3
759	III	12632236	A	T	intron_variant	MODIFIER	pqn-80
759	IV	3337707	G	A	missense_variant	MODERATE	hrp-1
759	IV	5148275	G	T	upstream_gene_variant	MODIFIER	21ur-12973
759	IV	5331259	G	T	upstream_gene_variant	MODIFIER	21ur-10863
759	IV	11109307	T	C	missense_variant	MODERATE	hpo-4
759	IV	12796741	C	G	upstream_gene_variant	MODIFIER	F07C6.7
759	IV	15339384	C	G	missense_variant	MODERATE	irld-59
759	IV	15931329	G	A	splice_region_variant&intron_variant	LOW	Y105C5B.9
759	V	5226372	A	T	upstream_gene_variant	MODIFIER	Y49G5B.6
759	V	7988976	T	C	upstream_gene_variant	MODIFIER	Y97E10AL.5
759	V	10355315	A	T	upstream_gene_variant	MODIFIER	K07C5.4
759	V	17030492	A	C	upstream_gene_variant	MODIFIER	F49H6.15
759	V	18831448	C	T	upstream_gene_variant	MODIFIER	C54E10.t4
759	X	2566100	A	C	upstream_gene_variant	MODIFIER	F52H2.6
759	X	14628138	G	A	downstream_gene_variant	MODIFIER	rbc-1
759	X	15429469	A	T	upstream_gene_variant	MODIFIER	nas-13
761	II	1216079	T	A	intron_variant	MODIFIER	F53A10.2
761	II	1530571	G	T	upstream_gene_variant	MODIFIER	Y51H7BR.7
761	II	5040302	A	T	missense_variant	MODERATE	F33G12.7
761	II	6341163	C	A	upstream_gene_variant	MODIFIER	C32D5.7
761	II	7110751	C	G	upstream_gene_variant	MODIFIER	F10E7.9
761	II	11063099	A	T	downstream_gene_variant	MODIFIER	F45E10.3
761	II	15204935	T	A	upstream_gene_variant	MODIFIER	spsb-1
761	III	875199	C	A	upstream_gene_variant	MODIFIER	T24C4.3
761	III	5141511	G	C	upstream_gene_variant	MODIFIER	21ur-15343
761	III	11312201	A	T	upstream_gene_variant	MODIFIER	rab-35
761	III	12821063	T	A	upstream_gene_variant	MODIFIER	arx-5
761	IV	2266992	C	A	upstream_gene_variant	MODIFIER	M70.4
761	IV	4169932	T	A	upstream_gene_variant	MODIFIER	rnp-2
761	IV	4343725	G	A	synonymous_variant	LOW	oac-52
761	IV	4571052	A	G	upstream_gene_variant	MODIFIER	F28E10.4
761	IV	6556673	G	A	upstream_gene_variant	MODIFIER	paqr-1
761	IV	8644743	G	C	start_lost	HIGH	C49C8.3
761	IV	12835435	C	A	upstream_gene_variant	MODIFIER	M02B1.3
761	IV	13240707	A	G	upstream_gene_variant	MODIFIER	JC8.2
761	V	9879154	C	T	upstream_gene_variant	MODIFIER	srab-19
761	V	13662693	T	C	synonymous_variant	LOW	letm-1
761	V	13867017	C	A	upstream_gene_variant	MODIFIER	F09F3.16
761	V	17932568	C	A	missense_variant	MODERATE	E01B7.1
761	X	2163585	C	A	synonymous_variant	LOW	nlp-37
761	X	3974026	C	T	upstream_gene_variant	MODIFIER	C16B8.8
761	X	5532983	G	C	upstream_gene_variant	MODIFIER	C54G7.14
761	X	12280273	T	G	upstream_gene_variant	MODIFIER	C04B4.6
761	X	17702344	A	T	upstream_gene_variant	MODIFIER	anr-17
767	I	168472	A	T	upstream_gene_variant	MODIFIER	ptr-11
767	I	957030	T	A	intron_variant	MODIFIER	mig-1
767	I	4306064	C	A	stop_gained&splice_region_variant	HIGH	Y47D9A.1
767	I	6915655	C	T	upstream_gene_variant	MODIFIER	smg-1
767	II	1445995	T	C	missense_variant	MODERATE	scl-17
767	II	5137810	C	T	synonymous_variant	LOW	F58A6.2
767	II	5418243	A	T	upstream_gene_variant	MODIFIER	EEED8.14
767	II	12595365	T	A	intron_variant	MODIFIER	ceh-100
767	II	15196190	C	A	upstream_gene_variant	MODIFIER	Y46E12BR.1
767	III	1295639	G	A	upstream_gene_variant	MODIFIER	fbxa-36
767	III	2175906	C	A	downstream_gene_variant	MODIFIER	mir-229
767	III	3242928	A	T	downstream_gene_variant	MODIFIER	Y53G8AL.1
767	III	6312474	G	A	upstream_gene_variant	MODIFIER	gar-2
767	III	6646573	G	T	upstream_gene_variant	MODIFIER	M01G4.6
767	III	8954268	A	T	upstream_gene_variant	MODIFIER	ZK643.2
767	III	9726342	C	G	splice_region_variant&intron_variant	LOW	C07A9.12
767	IV	11750192	C	G	upstream_gene_variant	MODIFIER	T12A7.12
767	IV	16460436	T	A	upstream_gene_variant	MODIFIER	21ur-14579
767	V	5645167	G	T	missense_variant	MODERATE	srx-117
767	V	8967946	A	G	upstream_gene_variant	MODIFIER	nhr-44
767	V	18016856	G	A	upstream_gene_variant	MODIFIER	srh-133
767	X	4812465	G	A	upstream_gene_variant	MODIFIER	ztf-16
767	X	17238337	C	T	upstream_gene_variant	MODIFIER	dhs-30
769	I	2411513	C	G	upstream_gene_variant	MODIFIER	Y39G10AR.26
769	I	3992537	T	G	upstream_gene_variant	MODIFIER	F28H1.1
769	I	6286778	T	G	missense_variant	MODERATE	C10G11.7
769	I	7147011	T	A	downstream_gene_variant	MODIFIER	fecl-1
769	II	1115568	T	A	upstream_gene_variant	MODIFIER	lips-11
769	II	6241815	T	A	missense_variant	MODERATE	tat-4
769	III	58322	C	G	missense_variant	MODERATE	W05G11.2
769	III	9387112	C	T	synonymous_variant	LOW	tkr-1
769	III	10690927	T	C	upstream_gene_variant	MODIFIER	fmo-3
769	III	11197068	A	T	upstream_gene_variant	MODIFIER	tra-1
769	III	12032351	T	A	upstream_gene_variant	MODIFIER	Y79H2A.12
769	IV	6343239	G	T	upstream_gene_variant	MODIFIER	Y73B6BL.288
769	IV	14843679	G	A	synonymous_variant	LOW	Y57G11C.20
769	IV	16533761	C	T	missense_variant	MODERATE	Y51H4A.6
769	V	567124	G	A	upstream_gene_variant	MODIFIER	sri-73
769	V	1588774	C	G	upstream_gene_variant	MODIFIER	F16B4.5
769	V	5344609	T	A	upstream_gene_variant	MODIFIER	srg-25
769	V	6416989	A	G	upstream_gene_variant	MODIFIER	T05H4.t1
769	V	6417001	G	A	upstream_gene_variant	MODIFIER	T05H4.t1
769	V	19159436	T	A	upstream_gene_variant	MODIFIER	Y39B6A.72
769	V	20572083	A	T	upstream_gene_variant	MODIFIER	F26F2.5
769	X	6818518	T	C	missense_variant	MODERATE	dhs-28
769	X	10119038	G	A	upstream_gene_variant	MODIFIER	T06H11.16
770	I	4692879	T	C	intron_variant	MODIFIER	chd-7
770	I	10996899	T	A	intron_variant	MODIFIER	Y52B11A.4
770	I	11035201	A	T	upstream_gene_variant	MODIFIER	Y52B11A.10
770	II	1574846	G	A	stop_gained	HIGH	K05F6.10
770	II	3067927	C	A	upstream_gene_variant	MODIFIER	Y25C1A.15
770	II	6794080	C	G	downstream_gene_variant	MODIFIER	T13C2.3
770	II	14614544	T	A	upstream_gene_variant	MODIFIER	mltn-9
770	II	14779445	A	T	upstream_gene_variant	MODIFIER	Y54E2A.8
770	III	601666	T	G	upstream_gene_variant	MODIFIER	Y55B1AR.2
770	III	4815006	T	A	upstream_gene_variant	MODIFIER	C38D4.7
770	IV	1985532	A	T	intron_variant	MODIFIER	Y76B12C.6
770	IV	3812268	T	A	intron_variant	MODIFIER	bris-1
770	IV	10263310	C	T	upstream_gene_variant	MODIFIER	F01G10.9
770	IV	14582955	C	T	upstream_gene_variant	MODIFIER	Y57G11B.8
770	V	1047921	A	G	splice_region_variant&intron_variant	LOW	nra-4
770	V	3031573	G	A	downstream_gene_variant	MODIFIER	asp-8
770	V	4696091	C	G	upstream_gene_variant	MODIFIER	cpg-8
770	V	5873647	A	G	missense_variant	MODERATE	C02G6.2
770	V	20589034	T	G	upstream_gene_variant	MODIFIER	F26F2.12
770	X	5291837	C	A	missense_variant	MODERATE	ags-3
770	X	6929264	G	A	3_prime_UTR_variant	MODIFIER	F14B8.6
770	X	8410217	T	A	synonymous_variant	LOW	F08F1.9

## Sheet: mev_indels
Line	CHROM	POS	REF	ALT	type	putative effect	Gene annotation
1730	I	3053025	GA	G	intron_variant	MODIFIER	ztf-23
1730	I	3324050	G	GA	intron_variant	MODIFIER	Y44E3A.4
1730	I	14390866	TA	T	upstream_gene_variant	MODIFIER	eat-18
1730	IV	1314776	T	TAA	intron_variant	MODIFIER	F53H1.4
1730	V	12274509	TA	T	upstream_gene_variant	MODIFIER	tsfm-1
1730	V	18569461	C	CG	upstream_gene_variant	MODIFIER	srg-34
1730	X	8008198	CT	C	upstream_gene_variant	MODIFIER	F45E1.10
1730	X	10252085	GC	G	upstream_gene_variant	MODIFIER	C14H10.2
704	I	3595471	GA	G	intron_variant	MODIFIER	Y47G6A.29
704	I	6184040	AT	A	upstream_gene_variant	MODIFIER	T09B4.9
704	I	9187044	C	CAT	upstream_gene_variant	MODIFIER	lim-9
704	III	8598490	G	GT	upstream_gene_variant	MODIFIER	ztf-30
704	III	11309641	G	GA	downstream_gene_variant	MODIFIER	smc-3
704	IV	10648479	GA	G	upstream_gene_variant	MODIFIER	glb-19
704	V	15367884	GCC	G	upstream_gene_variant	MODIFIER	R08H2.15
704	V	15367888	C	CA	upstream_gene_variant	MODIFIER	R08H2.15
706	II	3949911	GT	G	intron_variant	MODIFIER	T20H12.1
706	III	6093577	GT	G	upstream_gene_variant	MODIFIER	C05D10.4
706	IV	3298590	GCC	G	upstream_gene_variant	MODIFIER	W08E12.6
706	IV	11412409	TCTGGTGAA	T	frameshift_variant	HIGH	gfat-2
706	IV	12838415	C	CA	intron_variant	MODIFIER	M02B1.3
706	V	17816409	G	GA	upstream_gene_variant	MODIFIER	srh-298
706	V	18557373	TGCGTCGCGGCC	T	upstream_gene_variant	MODIFIER	Y51A2D.8
706	X	636410	ACATG	A	downstream_gene_variant	MODIFIER	M6.4
706	X	5004152	TA	T	upstream_gene_variant	MODIFIER	hsd-2
706	X	7833293	T	TA	intron_variant	MODIFIER	sul-3
706	X	10905330	A	AGAGTTTGTGT	3_prime_UTR_variant	MODIFIER	F47B10.8
711	I	3527333	A	AC	upstream_gene_variant	MODIFIER	Y47G6A.30
711	I	6764874	C	CT	upstream_gene_variant	MODIFIER	calu-2
711	I	7618558	A	ATT	intron_variant	MODIFIER	lrp-1
711	II	10506779	ATGT	A	upstream_gene_variant	MODIFIER	pqn-47
711	II	13225334	G	GAA	intergenic_region	MODIFIER	F15D4.2-flp-16
711	IV	6326268	G	GC	3_prime_UTR_variant	MODIFIER	sqd-1
711	V	1491250	T	TG	upstream_gene_variant	MODIFIER	C38C3.10
711	X	1468564	A	AT	upstream_gene_variant	MODIFIER	D1005.6
712	I	658138	TA	T	downstream_gene_variant	MODIFIER	Y65B4A.2
712	I	11931087	ATAACTGAGTCTAC	A	upstream_gene_variant	MODIFIER	wve-1
712	III	805910	T	TTGTGCG	intron_variant	MODIFIER	trpp-11
712	III	805912	A	AACAATAT	intron_variant	MODIFIER	trpp-11
712	IV	11115165	T	TC	upstream_gene_variant	MODIFIER	rps-5
712	IV	16022864	A	AT	upstream_gene_variant	MODIFIER	21ur-3707
712	IV	16022876	GTTT	G	upstream_gene_variant	MODIFIER	21ur-2356
712	V	12413572	CA	C	upstream_gene_variant	MODIFIER	cdr-4
712	V	16836353	A	ATG	upstream_gene_variant	MODIFIER	srh-215
712	V	17683356	C	CA	upstream_gene_variant	MODIFIER	F59A1.6
715	IV	7273587	C	CCAATAAGGG	upstream_gene_variant	MODIFIER	C06E4.21
715	IV	12599385	C	CTG	upstream_gene_variant	MODIFIER	pgp-1
715	IV	14595122	G	GT	upstream_gene_variant	MODIFIER	21ur-13308
715	V	1251626	TA	T	intergenic_region	MODIFIER	C39F7.6-C39F7.1
715	V	10132283	A	AT	upstream_gene_variant	MODIFIER	aos-1
715	V	18609870	TTCATCCGA	T	upstream_gene_variant	MODIFIER	Y51A2D.32
715	X	7846801	GGCTGGTA	G	frameshift_variant	HIGH	C54D2.6
715	X	11482116	G	GA	upstream_gene_variant	MODIFIER	T25C12.11
721	II	13685429	G	GT	intron_variant	MODIFIER	rpoa-1
721	III	657305	AG	A	upstream_gene_variant	MODIFIER	C09F5.1
721	IV	15751829	G	GT	upstream_gene_variant	MODIFIER	21ur-10736
721	V	2825296	AAAATTTCAAATTTC	A	splice_region_variant&intron_variant	LOW	T03D3.5
721	X	13002581	AC	A	downstream_gene_variant	MODIFIER	F11C1.5
727	I	11052535	TG	T	downstream_gene_variant	MODIFIER	Y52B11A.10
727	II	5854918	G	GGTAT	upstream_gene_variant	MODIFIER	H41C03.2
727	II	10076289	A	ATATG	upstream_gene_variant	MODIFIER	C18D1.14
727	II	12422690	TCTTTCAG	T	upstream_gene_variant	MODIFIER	sre-26
727	III	9896603	AACTGG	A	frameshift_variant	HIGH	mam-7
727	IV	1897889	C	CT	upstream_gene_variant	MODIFIER	egl-18
727	IV	3344703	G	GT	upstream_gene_variant	MODIFIER	fbxa-130
727	IV	9573985	G	GT	upstream_gene_variant	MODIFIER	npr-2
727	V	4231127	G	GGTAT	upstream_gene_variant	MODIFIER	21ur-9143
727	V	12579745	G	GGGA	conservative_inframe_insertion	MODERATE	E02A10.5
727	V	15878645	GC	G	upstream_gene_variant	MODIFIER	T06C12.16
727	X	317058	T	TTATAGCG	intergenic_region	MODIFIER	M02E1.2-M02E1.3
727	X	10345098	CAT	C	upstream_gene_variant	MODIFIER	R07E3.1
729	I	6085918	CT	C	3_prime_UTR_variant	MODIFIER	haf-9
729	III	9973476	TTGTTGAATTTTTTTAAAGTATTCGTAC	T	upstream_gene_variant	MODIFIER	R10E12.11
729	IV	16442723	AT	A	upstream_gene_variant	MODIFIER	21ur-9880
729	V	992903	T	TC	downstream_gene_variant	MODIFIER	unc-34
729	V	19803179	T	TGAAGCCC	upstream_gene_variant	MODIFIER	Y116F11B.2
729	X	356276	GT	G	upstream_gene_variant	MODIFIER	C04E7.t1
729	X	3907011	AT	A	upstream_gene_variant	MODIFIER	T22B2.8
729	X	6965400	C	CA	upstream_gene_variant	MODIFIER	C16E9.15
733	I	3234893	A	AAAT	downstream_gene_variant	MODIFIER	txl-1
733	I	13472690	A	AGT	upstream_gene_variant	MODIFIER	Y48G10A.4
733	II	7978582	A	AT	upstream_gene_variant	MODIFIER	C04H4.2
733	II	11280098	T	TTC	upstream_gene_variant	MODIFIER	unc-130
733	II	11569037	TA	T	splice_region_variant&intron_variant	LOW	F54D5.23
733	III	204063	AAATTATTGATTTTTCCTG	A	upstream_gene_variant	MODIFIER	W10C4.2
733	III	5987250	GGA	G	splice_region_variant&non_coding_transcript_exon_variant	LOW	T04C9.12
733	V	3832041	TACG	T	intergenic_region	MODIFIER	H10D18.5-H10D18.6
733	V	14576830	GCT	G	upstream_gene_variant	MODIFIER	Y40H4A.3
733	V	18698763	TGATCTTCCATCTACGTCATCG	T	upstream_gene_variant	MODIFIER	Y69H2.26
733	X	4379782	GA	G	downstream_gene_variant	MODIFIER	R160.2
733	X	5350878	AT	A	downstream_gene_variant	MODIFIER	C26B9.1
737	II	251873	G	GACTACAAACTACAA	upstream_gene_variant	MODIFIER	21ur-15264
737	III	3105986	TA	T	upstream_gene_variant	MODIFIER	Y53G8B.2
737	III	3105993	A	AT	upstream_gene_variant	MODIFIER	Y53G8B.2
737	IV	6099288	T	TGA	upstream_gene_variant	MODIFIER	K08B4.41
737	V	7408990	CG	C	upstream_gene_variant	MODIFIER	str-24
737	V	19043595	ATATATGTATATG	A	upstream_gene_variant	MODIFIER	asp-16
737	X	17141033	A	AT	upstream_gene_variant	MODIFIER	cnp-3
738	I	2121550	GT	G	upstream_gene_variant	MODIFIER	fpn-1.1
738	I	13361326	GTTTTTTTTGGAAATTTTTGAT	G	downstream_gene_variant	MODIFIER	Y40B1A.3
738	II	5899449	C	CA	upstream_gene_variant	MODIFIER	F59G1.13
738	II	15041602	TG	T	downstream_gene_variant	MODIFIER	Y53F4B.13
738	III	7464317	TA	T	upstream_gene_variant	MODIFIER	H14A12.9
738	IV	1411395	AT	A	upstream_gene_variant	MODIFIER	rpc-11
738	IV	2226190	GT	G	downstream_gene_variant	MODIFIER	T04C4.2
738	X	15000864	AT	A	upstream_gene_variant	MODIFIER	cutl-3
744	I	13165683	GT	G	upstream_gene_variant	MODIFIER	F22G12.4
744	II	5604334	A	ATATG	upstream_gene_variant	MODIFIER	C17G10.10
744	II	9158817	T	TATTCGTCGGATC	disruptive_inframe_insertion	MODERATE	oac-54
744	V	2920018	A	ATATG	upstream_gene_variant	MODIFIER	srj-51
744	V	10193281	AGCTAT	A	upstream_gene_variant	MODIFIER	ZK856.5
744	V	15193586	CT	C	frameshift_variant	HIGH	plc-2
744	V	16190534	TG	T	upstream_gene_variant	MODIFIER	srh-281
744	V	18694884	A	AT	upstream_gene_variant	MODIFIER	Y69H2.26
744	X	2504203	GA	G	splice_region_variant&intron_variant	LOW	K02E10.7
746	I	1968036	AAAAAAT	A	upstream_gene_variant	MODIFIER	Y51F10.3
746	III	413034	G	GAGATGCTAA	intron_variant	MODIFIER	stim-1
746	IV	16491683	C	CTG	upstream_gene_variant	MODIFIER	rho-1
746	V	10314855	A	AT	upstream_gene_variant	MODIFIER	gcy-6
746	X	7322835	ATGAC	A	upstream_gene_variant	MODIFIER	spp-4
748	I	2658645	T	TC	upstream_gene_variant	MODIFIER	F40E3.5
748	II	1155693	GC	G	downstream_gene_variant	MODIFIER	pod-2
748	II	4814545	G	GA	upstream_gene_variant	MODIFIER	rig-6
748	V	16014780	AAACG	A	frameshift_variant	HIGH	str-232
749	II	2352746	CT	C	upstream_gene_variant	MODIFIER	F43C11.10
749	II	10216219	CGGTATACCTAGAA	C	upstream_gene_variant	MODIFIER	ref-1
749	II	13875239	GT	G	3_prime_UTR_variant	MODIFIER	Y51H1A.3
749	III	12018533	TG	T	upstream_gene_variant	MODIFIER	Y79H2A.13
749	V	1586172	CA	C	upstream_gene_variant	MODIFIER	F16B4.6
749	V	12696867	T	TA	splice_region_variant	LOW	K10C8.4
749	X	12031275	C	CT	3_prime_UTR_variant	MODIFIER	B0198.2
749	X	14956057	A	AG	upstream_gene_variant	MODIFIER	pag-3
752	II	12247271	GAAAAATA	G	downstream_gene_variant	MODIFIER	tag-276
752	II	15225074	CA	C	upstream_gene_variant	MODIFIER	Y46E12BL.11
752	III	2600115	TA	T	upstream_gene_variant	MODIFIER	apb-1
752	III	5164156	A	ACTTTT	frameshift_variant&stop_gained	HIGH	T10F2.2
752	III	10463656	G	GA	upstream_gene_variant	MODIFIER	D2045.2
752	IV	11402824	AT	A	upstream_gene_variant	MODIFIER	dsl-6
752	IV	16959080	ACAAAAAATT	A	intron_variant	MODIFIER	Y116A8C.13
752	V	6796906	T	TA	upstream_gene_variant	MODIFIER	gck-2
752	V	7598103	T	TA	frameshift_variant	HIGH	C50E3.8
752	V	10370954	G	GATAC	upstream_gene_variant	MODIFIER	ugt-49
752	V	20571825	TATTTTAC	T	upstream_gene_variant	MODIFIER	F26F2.5
752	X	9240137	CCATAAA	C	upstream_gene_variant	MODIFIER	21ur-13848
753	I	3081101	AT	A	downstream_gene_variant	MODIFIER	riok-1
753	I	15046345	AT	A	upstream_gene_variant	MODIFIER	F31C3.12
753	II	6692235	CT	C	downstream_gene_variant	MODIFIER	C18H9.3
753	II	7252733	TTAGA	T	upstream_gene_variant	MODIFIER	prx-13
753	V	19691632	GA	G	downstream_gene_variant	MODIFIER	Y43F8C.13
753	X	15357094	AT	A	upstream_gene_variant	MODIFIER	Y15E3A.8
759	I	2869776	G	GA	3_prime_UTR_variant	MODIFIER	Y71F9AL.10
759	I	4506045	G	GT	splice_region_variant&intron_variant	LOW	gcy-28
759	II	2576091	AC	A	downstream_gene_variant	MODIFIER	usp-39
759	II	5993570	A	AT	upstream_gene_variant	MODIFIER	ins-3
759	III	11060569	GA	G	upstream_gene_variant	MODIFIER	rsa-2
759	III	11706281	CCTGGTGTACCAGCAGGTCCCG	C	disruptive_inframe_deletion	MODERATE	col-96
759	III	13301834	ATTCGAATT	A	downstream_gene_variant	MODIFIER	npp-18
759	V	9408445	AC	A	upstream_gene_variant	MODIFIER	F36D4.4
759	X	2906656	AT	A	upstream_gene_variant	MODIFIER	F52B10.14
761	I	10874308	CT	C	upstream_gene_variant	MODIFIER	mir-1817
761	I	11859008	AAC	A	intron_variant	MODIFIER	ced-1
761	I	13871032	CA	C	intron_variant	MODIFIER	taf-1
761	II	9068243	T	TA	upstream_gene_variant	MODIFIER	T24B8.18
761	II	11192611	CATTTTA	C	downstream_gene_variant	MODIFIER	sfxn-1.2
761	V	2685100	GC	G	downstream_gene_variant	MODIFIER	W02G9.6
761	X	7597791	GT	G	downstream_gene_variant	MODIFIER	adt-2
767	I	6521813	TA	T	3_prime_UTR_variant	MODIFIER	T10E9.5
767	I	8330796	G	GA	upstream_gene_variant	MODIFIER	rpl-25.2
767	IV	10963147	T	TG	upstream_gene_variant	MODIFIER	Y69E1A.14
767	IV	14864869	A	AT	upstream_gene_variant	MODIFIER	Y57G11C.23
767	IV	17220393	G	GT	splice_region_variant&intron_variant	LOW	Y116A8B.98
767	V	308153	GA	G	upstream_gene_variant	MODIFIER	F33E11.3
767	V	20696150	A	AT	upstream_gene_variant	MODIFIER	F53F8.4
767	X	4812466	T	TTA	upstream_gene_variant	MODIFIER	ztf-16
769	I	13061393	AACAGCCGATCATAGCTGATC	A	upstream_gene_variant	MODIFIER	nhr-85
769	II	3097395	T	TA	upstream_gene_variant	MODIFIER	srg-22
769	IV	1807672	T	TA	upstream_gene_variant	MODIFIER	Y38C1BA.1
769	V	18073493	GCCGCCGCCACCGCCA	G	disruptive_inframe_deletion	MODERATE	Y59A8B.10
770	I	881961	T	TC	upstream_gene_variant	MODIFIER	Y95B8A.6
770	I	2078931	TA	T	upstream_gene_variant	MODIFIER	Y37E3.11
770	I	15048823	AT	A	upstream_gene_variant	MODIFIER	F31C3.12
770	II	7151799	A	ATC	upstream_gene_variant	MODIFIER	fust-1
770	IV	12073016	A	AATGT	upstream_gene_variant	MODIFIER	K08E4.7
770	IV	13893446	CA	C	3_prime_UTR_variant	MODIFIER	lin-66
770	V	10891592	A	AT	3_prime_UTR_variant	MODIFIER	F32D8.4
770	V	18596650	G	GT	intron_variant	MODIFIER	grdn-1
770	X	1596981	CA	C	upstream_gene_variant	MODIFIER	B0344.1
770	X	13720749	TA	T	upstream_gene_variant	MODIFIER	K11E4.6

## Sheet: N2_BS
Line	CHROM	POS	REF	ALT	type	putative effect	Gene annotation
504	I	703753	A	C	missense_variant	MODERATE	hgap-1
504	I	1752842	C	T	missense_variant	MODERATE	Y71G12B.10
504	I	3135893	G	C	upstream_gene_variant	MODIFIER	K09H9.9
504	I	3319038	G	A	upstream_gene_variant	MODIFIER	trx-4
504	I	5902914	A	G	synonymous_variant	LOW	stam-1
504	I	6492266	T	C	missense_variant	MODERATE	dbr-1
504	I	7531848	A	T	upstream_gene_variant	MODIFIER	C26C6.4
504	I	7886433	T	A	upstream_gene_variant	MODIFIER	mir-245
504	I	10605176	T	C	synonymous_variant	LOW	pash-1
504	I	11209574	T	G	upstream_gene_variant	MODIFIER	Y53H1A.7
504	I	11605919	G	A	upstream_gene_variant	MODIFIER	C17D12.8
504	I	12562156	G	A	upstream_gene_variant	MODIFIER	W02D9.7
504	I	14154784	A	G	3_prime_UTR_variant	MODIFIER	C37A5.3
504	II	1234625	T	A	missense_variant	MODERATE	lin-42
504	II	4720525	A	T	synonymous_variant	LOW	F10G7.10
504	II	5722131	A	T	3_prime_UTR_variant	MODIFIER	rab-3
504	II	10393591	T	A	3_prime_UTR_variant	MODIFIER	T09F3.2
504	II	11840900	T	G	upstream_gene_variant	MODIFIER	T27D12.10
504	III	8257489	A	C	synonymous_variant	LOW	F09G8.5
504	III	8453601	G	A	upstream_gene_variant	MODIFIER	C30C11.8
504	III	9517045	G	T	3_prime_UTR_variant	MODIFIER	clu-1
504	III	11168486	T	A	downstream_gene_variant	MODIFIER	Y47D3A.5
504	IV	114141	G	T	upstream_gene_variant	MODIFIER	B0545.4
504	IV	2965697	T	A	upstream_gene_variant	MODIFIER	Y54G2A.57
504	IV	5317200	G	A	upstream_gene_variant	MODIFIER	msp-59
504	IV	16357788	T	A	upstream_gene_variant	MODIFIER	21ur-13909
504	V	286873	A	T	intergenic_region	MODIFIER	npr-5-F33E11.2
504	V	1199785	C	A	upstream_gene_variant	MODIFIER	Y50D4A.4
504	V	2925723	C	A	upstream_gene_variant	MODIFIER	srh-38
504	V	5561394	T	A	upstream_gene_variant	MODIFIER	C18C4.5
504	V	14467075	T	A	missense_variant	MODERATE	srz-97
504	V	16477864	T	C	upstream_gene_variant	MODIFIER	T08G3.14
504	V	17179560	A	G	missense_variant	MODERATE	srh-174
504	V	20163874	T	C	upstream_gene_variant	MODIFIER	F19B2.5
504	X	1997218	G	T	3_prime_UTR_variant	MODIFIER	Y40A1A.3
504	X	5127890	T	A	upstream_gene_variant	MODIFIER	C31H2.7
504	X	5216395	G	C	start_lost	HIGH	H28G03.1
504	X	8627447	T	A	upstream_gene_variant	MODIFIER	K01A12.3
504	X	13062283	T	A	upstream_gene_variant	MODIFIER	K03A11.5
504	X	14477764	C	A	upstream_gene_variant	MODIFIER	M163.14
504	X	14789103	T	A	upstream_gene_variant	MODIFIER	F42D1.8
508	I	11647051	T	G	upstream_gene_variant	MODIFIER	kin-23
508	I	13161216	T	A	upstream_gene_variant	MODIFIER	F22G12.t2
508	II	800338	T	A	upstream_gene_variant	MODIFIER	F46F5.2
508	II	906875	T	G	upstream_gene_variant	MODIFIER	fbxc-27
508	II	909949	C	A	synonymous_variant	LOW	fbxc-27
508	II	1737126	A	T	upstream_gene_variant	MODIFIER	ceh-83
508	II	7696851	C	T	missense_variant	MODERATE	B0495.5
508	II	8482862	T	A	upstream_gene_variant	MODIFIER	lact-4
508	II	8896757	C	T	upstream_gene_variant	MODIFIER	B0457.18
508	II	9718381	C	T	missense_variant	MODERATE	Y53C12A.11
508	II	11605849	C	G	stop_gained	HIGH	F07A11.4
508	II	12142200	C	A	intron_variant	MODIFIER	Y57A10A.1
508	II	13394632	G	A	missense_variant	MODERATE	Y48C3A.14
508	III	1549481	G	A	synonymous_variant	LOW	Y67D2.6
508	III	1768197	T	G	upstream_gene_variant	MODIFIER	Y46E12A.6
508	III	4140228	T	A	downstream_gene_variant	MODIFIER	C30D11.5
508	III	5105372	G	T	stop_gained	HIGH	F54D8.6
508	III	9045528	C	A	upstream_gene_variant	MODIFIER	nac-2
508	III	11664283	G	A	intron_variant	MODIFIER	crh-1
508	III	13483290	G	A	upstream_gene_variant	MODIFIER	21ur-13175
508	IV	236861	T	A	upstream_gene_variant	MODIFIER	cogc-8
508	IV	1135288	C	T	upstream_gene_variant	MODIFIER	C44B12.6
508	IV	1884104	T	A	downstream_gene_variant	MODIFIER	egl-4
508	IV	5628274	G	T	upstream_gene_variant	MODIFIER	srsx-15
508	IV	7231622	A	C	upstream_gene_variant	MODIFIER	R13A1.10
508	IV	12159429	A	T	upstream_gene_variant	MODIFIER	eri-12
508	V	4070288	A	T	upstream_gene_variant	MODIFIER	otpl-2
508	V	16552747	C	A	upstream_gene_variant	MODIFIER	Y32B12B.4
508	V	17453472	T	C	downstream_gene_variant	MODIFIER	srh-157
508	V	17835877	A	G	upstream_gene_variant	MODIFIER	Y59A8A.7
508	V	17866666	T	G	upstream_gene_variant	MODIFIER	phf-14
508	V	20407093	G	A	upstream_gene_variant	MODIFIER	F53H2.3
508	X	6215695	G	A	upstream_gene_variant	MODIFIER	C14F11.2
508	X	6500565	G	A	missense_variant	MODERATE	cdf-1
508	X	9903500	C	T	upstream_gene_variant	MODIFIER	phf-34
508	X	11640325	A	T	upstream_gene_variant	MODIFIER	Y71H9A.8
508	X	11841046	C	G	upstream_gene_variant	MODIFIER	taf-7.1
508	X	14902715	A	T	upstream_gene_variant	MODIFIER	Y70D2A.6
508	X	17656417	T	A	downstream_gene_variant	MODIFIER	T23E7.5
522	I	174017	C	A	synonymous_variant	LOW	F56C11.6
522	I	315478	T	G	upstream_gene_variant	MODIFIER	C53D5.5
522	I	607615	T	A	upstream_gene_variant	MODIFIER	hum-7
522	I	1879111	G	A	upstream_gene_variant	MODIFIER	tub-2
522	I	2066058	G	A	upstream_gene_variant	MODIFIER	Y37E3.1
522	I	2158128	T	C	upstream_gene_variant	MODIFIER	afd-1
522	I	3178561	A	T	missense_variant	MODERATE	Y54E10A.11
522	I	5853040	G	T	upstream_gene_variant	MODIFIER	F33D11.7
522	I	7592841	C	A	upstream_gene_variant	MODIFIER	prg-1
522	I	9594047	C	A	upstream_gene_variant	MODIFIER	K07A1.4
522	I	11127981	A	T	downstream_gene_variant	MODIFIER	Y52B11B.1
522	I	11359890	T	A	upstream_gene_variant	MODIFIER	pes-2.2
522	I	14540248	G	A	intron_variant	MODIFIER	zoo-1
522	II	1734221	A	G	upstream_gene_variant	MODIFIER	irld-33
522	II	3887815	C	T	upstream_gene_variant	MODIFIER	F53C3.8
522	II	4392412	C	T	upstream_gene_variant	MODIFIER	mlt-7
522	II	7747731	A	C	missense_variant	MODERATE	cpna-2
522	II	8336336	C	T	missense_variant	MODERATE	C26D10.7
522	II	11334504	G	T	upstream_gene_variant	MODIFIER	B0491.t2
522	II	11778059	A	T	upstream_gene_variant	MODIFIER	F44E5.1
522	II	11993149	G	T	synonymous_variant	LOW	dhps-1
522	II	13348127	G	C	upstream_gene_variant	MODIFIER	dmsr-3
522	III	529629	A	T	upstream_gene_variant	MODIFIER	T22F7.4
522	III	1319527	G	A	missense_variant	MODERATE	fbxa-15
522	III	2101779	G	A	upstream_gene_variant	MODIFIER	ppk-2
522	III	2852317	G	A	upstream_gene_variant	MODIFIER	21ur-14267
522	III	8699248	G	T	3_prime_UTR_variant	MODIFIER	B0303.7
522	III	10387584	A	T	upstream_gene_variant	MODIFIER	C38H2.3
522	IV	601579	A	T	upstream_gene_variant	MODIFIER	col-102
522	IV	1352688	T	C	upstream_gene_variant	MODIFIER	21ur-13561
522	IV	1786997	T	G	downstream_gene_variant	MODIFIER	Y38C1BA.5
522	IV	2024070	C	T	intron_variant	MODIFIER	cpsf-1
522	IV	5092997	T	A	3_prime_UTR_variant	MODIFIER	C02B10.3
522	IV	6245901	C	T	missense_variant	MODERATE	F58F9.7
522	IV	10779325	G	C	3_prime_UTR_variant	MODIFIER	swt-3
522	IV	13985772	C	T	upstream_gene_variant	MODIFIER	21ur-12974
522	V	3353248	A	T	upstream_gene_variant	MODIFIER	C17B7.12
522	V	3367732	T	A	missense_variant	MODERATE	C04E12.4
522	V	4786077	G	A	synonymous_variant	LOW	Y60C6A.1
522	V	4786090	A	G	missense_variant	MODERATE	Y60C6A.1
522	V	4786092	C	T	synonymous_variant	LOW	Y60C6A.1
522	V	4786095	C	T	synonymous_variant	LOW	Y60C6A.1
522	V	4786099	C	G	missense_variant	MODERATE	Y60C6A.1
522	V	4786100	T	A	missense_variant	MODERATE	Y60C6A.1
522	V	4786101	A	G	synonymous_variant	LOW	Y60C6A.1
522	V	6915419	G	C	missense_variant	MODERATE	unc-68
522	V	7552973	G	A	synonymous_variant	LOW	ttr-10
522	V	8792424	A	C	3_prime_UTR_variant	MODIFIER	sup-37
522	V	14122280	C	T	synonymous_variant	LOW	par-1
522	V	16576587	T	A	downstream_gene_variant	MODIFIER	str-149
522	V	19771254	G	A	downstream_gene_variant	MODIFIER	M162.5
522	V	20124048	A	T	upstream_gene_variant	MODIFIER	ncx-1
522	X	1576744	T	A	missense_variant	MODERATE	wrt-9
522	X	1994930	A	G	upstream_gene_variant	MODIFIER	anr-24
522	X	3130984	C	A	upstream_gene_variant	MODIFIER	spc-1
522	X	6345994	A	T	upstream_gene_variant	MODIFIER	C03B1.6
522	X	7300016	G	T	upstream_gene_variant	MODIFIER	K03A1.4
522	X	8191878	A	T	intron_variant	MODIFIER	C17H11.6
522	X	10740543	A	G	downstream_gene_variant	MODIFIER	R07A4.2
522	X	11371845	G	A	synonymous_variant	LOW	ttyh-1
522	X	13950697	C	T	upstream_gene_variant	MODIFIER	K02B9.9
522	X	15943409	A	C	upstream_gene_variant	MODIFIER	mrp-3
522	X	17703445	G	A	downstream_gene_variant	MODIFIER	cgt-2
537	I	5500728	A	T	downstream_gene_variant	MODIFIER	mrpl-24
537	I	6007341	A	T	upstream_gene_variant	MODIFIER	C06A5.1
537	I	7002496	C	A	upstream_gene_variant	MODIFIER	C30F12.5
537	I	9180579	G	T	upstream_gene_variant	MODIFIER	F25H5.8
537	I	9655473	A	C	missense_variant	MODERATE	T05F1.11
537	I	11198770	T	C	upstream_gene_variant	MODIFIER	F28D9.6
537	I	13461838	A	G	upstream_gene_variant	MODIFIER	21ur-15556
537	I	13837352	C	T	synonymous_variant	LOW	W04A8.1
537	I	14908762	A	T	upstream_gene_variant	MODIFIER	ZK270.5
537	II	1575669	G	A	missense_variant	MODERATE	K05F6.10
537	II	2334354	A	C	upstream_gene_variant	MODIFIER	F43C11.7
537	II	6466699	G	A	upstream_gene_variant	MODIFIER	K06A1.9
537	II	13502101	C	A	upstream_gene_variant	MODIFIER	F54F11.1
537	III	235509	C	A	upstream_gene_variant	MODIFIER	hpo-29
537	III	679011	G	A	synonymous_variant	LOW	grk-2
537	III	679022	A	C	missense_variant	MODERATE	grk-2
537	III	944007	G	A	upstream_gene_variant	MODIFIER	fbxa-59
537	III	1566804	G	T	upstream_gene_variant	MODIFIER	rep-1
537	III	5573889	T	A	upstream_gene_variant	MODIFIER	molo-1
537	III	7205601	C	A	upstream_gene_variant	MODIFIER	R151.18
537	III	9569573	G	T	upstream_gene_variant	MODIFIER	C48B4.11
537	III	13217316	A	T	downstream_gene_variant	MODIFIER	tsp-3
537	IV	1879451	C	T	intron_variant	MODIFIER	egl-4
537	IV	2620467	C	T	downstream_gene_variant	MODIFIER	daao-1
537	IV	2667304	T	A	upstream_gene_variant	MODIFIER	Y69A2AR.31
537	IV	4028274	T	A	upstream_gene_variant	MODIFIER	hlh-30
537	IV	7842559	G	A	upstream_gene_variant	MODIFIER	C06A6.7
537	IV	8601159	T	A	upstream_gene_variant	MODIFIER	21ur-13215
537	IV	8852392	G	A	upstream_gene_variant	MODIFIER	alp-1
537	IV	16173789	A	T	upstream_gene_variant	MODIFIER	gln-3
537	V	160542	T	A	missense_variant	MODERATE	ttb-1
537	V	1120627	G	A	downstream_gene_variant	MODIFIER	Y50D4B.8
537	V	1606250	C	T	upstream_gene_variant	MODIFIER	nhr-177
537	V	4430468	T	C	upstream_gene_variant	MODIFIER	hpo-37
537	V	6344710	C	A	upstream_gene_variant	MODIFIER	F13H6.14
537	V	6630158	A	T	upstream_gene_variant	MODIFIER	ppt-1
537	V	6656916	T	C	upstream_gene_variant	MODIFIER	syx-18
537	V	7824274	C	T	upstream_gene_variant	MODIFIER	mig-6
537	V	11186320	T	A	upstream_gene_variant	MODIFIER	VK10D6R.t1
537	V	12222697	A	T	upstream_gene_variant	MODIFIER	ZK836.12
537	V	16472762	T	A	synonymous_variant	LOW	srw-35
537	V	16539670	G	A	upstream_gene_variant	MODIFIER	Y32B12B.2
537	V	16539672	G	A	upstream_gene_variant	MODIFIER	Y32B12B.2
537	V	17229148	T	A	upstream_gene_variant	MODIFIER	srh-112
537	V	19172655	A	T	upstream_gene_variant	MODIFIER	hot-2
537	X	3896512	A	G	upstream_gene_variant	MODIFIER	F47F2.3
537	X	3896515	C	A	upstream_gene_variant	MODIFIER	F47F2.3
537	X	7856143	G	A	synonymous_variant	LOW	cca-1
537	X	8070661	A	G	downstream_gene_variant	MODIFIER	C18A11.3
537	X	8421527	G	A	synonymous_variant	LOW	tag-123
537	X	13347763	G	A	missense_variant	MODERATE	ptr-24
537	X	13355296	A	T	upstream_gene_variant	MODIFIER	mxl-3
537	X	13705356	G	A	upstream_gene_variant	MODIFIER	K02D3.1
537	X	14466406	T	A	upstream_gene_variant	MODIFIER	M163.9
547	I	2517302	C	G	upstream_gene_variant	MODIFIER	Y23H5B.7
547	I	3255620	G	A	upstream_gene_variant	MODIFIER	Y54E10A.28
547	I	5339751	G	A	missense_variant	MODERATE	F55A12.6
547	I	6670410	G	T	upstream_gene_variant	MODIFIER	ZC581.9
547	I	6759535	T	A	upstream_gene_variant	MODIFIER	hrpf-1
547	I	10538911	C	G	upstream_gene_variant	MODIFIER	tli-1
547	I	12296730	C	T	upstream_gene_variant	MODIFIER	gmd-2
547	II	4340063	A	G	upstream_gene_variant	MODIFIER	athp-2
547	II	10331447	C	A	missense_variant	MODERATE	M02G9.1
547	II	10595831	T	A	upstream_gene_variant	MODIFIER	C14A4.6
547	II	11197041	A	T	upstream_gene_variant	MODIFIER	F37H8.8
547	II	12170286	A	T	upstream_gene_variant	MODIFIER	rol-1
547	II	12295843	C	G	missense_variant	MODERATE	Y57A10A.31
547	II	12525889	T	C	missense_variant	MODERATE	srx-118
547	II	14735304	T	C	synonymous_variant	LOW	npr-34
547	III	508812	C	T	missense_variant	MODERATE	F30H5.3
547	III	1671571	T	G	upstream_gene_variant	MODIFIER	glb-30
547	III	9081050	G	A	missense_variant	MODERATE	far-1
547	III	13525767	C	T	upstream_gene_variant	MODIFIER	pod-1
547	IV	4393998	A	T	upstream_gene_variant	MODIFIER	rpl-7A
547	IV	4801125	A	C	upstream_gene_variant	MODIFIER	eor-1
547	IV	5169378	G	C	upstream_gene_variant	MODIFIER	nspd-6
547	IV	11619712	G	A	synonymous_variant	LOW	dsl-5
547	IV	13315215	T	C	upstream_gene_variant	MODIFIER	fat-1
547	IV	13315240	G	T	upstream_gene_variant	MODIFIER	fat-1
547	IV	13315242	C	T	upstream_gene_variant	MODIFIER	fat-1
547	IV	13315251	T	C	upstream_gene_variant	MODIFIER	fat-1
547	IV	13637823	C	T	missense_variant	MODERATE	C08F11.7
547	IV	13769624	C	A	upstream_gene_variant	MODIFIER	21ur-708
547	IV	16400560	G	C	upstream_gene_variant	MODIFIER	Y65A5A.1
547	V	1934636	A	T	upstream_gene_variant	MODIFIER	T06A1.8
547	V	3445661	C	A	upstream_gene_variant	MODIFIER	cfz-2
547	V	6040492	G	A	3_prime_UTR_variant	MODIFIER	F29G9.1
547	V	6357545	C	T	5_prime_UTR_variant	MODIFIER	F13H6.1
547	V	6597019	G	A	missense_variant	MODERATE	hcp-1
547	V	7727731	G	T	upstream_gene_variant	MODIFIER	ZK105.6
547	V	9135304	G	T	missense_variant	MODERATE	B0222.1
547	V	11785997	C	A	stop_gained	HIGH	F55A11.7
547	V	11795886	C	T	upstream_gene_variant	MODIFIER	D2023.12
547	V	12822179	C	A	upstream_gene_variant	MODIFIER	ZC443.4
547	V	13006841	C	A	3_prime_UTR_variant	MODIFIER	inft-2
547	V	18553008	C	G	upstream_gene_variant	MODIFIER	ttr-25
547	V	19449420	A	T	upstream_gene_variant	MODIFIER	M04C3.1
547	X	4483338	A	C	upstream_gene_variant	MODIFIER	ncr-1
547	X	8471398	G	A	upstream_gene_variant	MODIFIER	mec-10
547	X	8932311	T	A	upstream_gene_variant	MODIFIER	acs-22
547	X	15226539	T	C	synonymous_variant	LOW	H03A11.2
547	X	15730861	G	T	missense_variant	MODERATE	lin-15B
550	I	434002	T	C	intergenic_region	MODIFIER	C07F11.2-tol-1
550	I	3324087	T	C	intron_variant	MODIFIER	Y44E3A.4
550	I	3540264	A	T	downstream_gene_variant	MODIFIER	Y47G6A.5
550	I	4033685	G	A	upstream_gene_variant	MODIFIER	unc-73
550	I	4506380	G	A	downstream_gene_variant	MODIFIER	mrpl-19
550	I	8263073	C	T	upstream_gene_variant	MODIFIER	sre-23
550	I	11117033	T	C	downstream_gene_variant	MODIFIER	Y52B11B.2
550	I	12253901	G	A	downstream_gene_variant	MODIFIER	oac-26
550	I	12774997	G	A	synonymous_variant	LOW	B0019.2
550	II	509704	T	A	upstream_gene_variant	MODIFIER	T27A1.1
550	II	2259827	G	A	missense_variant	MODERATE	K09F6.3
550	II	4934324	T	A	missense_variant	MODERATE	gst-30
550	II	5595404	G	A	missense_variant	MODERATE	C17G10.2
550	II	5939583	C	T	synonymous_variant	LOW	egl-44
550	II	7810883	G	A	upstream_gene_variant	MODIFIER	T05A6.10
550	II	9680099	C	T	upstream_gene_variant	MODIFIER	ZK1320.13
550	II	14359325	A	G	upstream_gene_variant	MODIFIER	agl-1
550	III	2014538	A	T	intron_variant	MODIFIER	ckr-2
550	III	3163044	T	G	upstream_gene_variant	MODIFIER	R148.5
550	III	3270907	T	A	upstream_gene_variant	MODIFIER	Y53G8AM.7
550	III	4205381	T	A	upstream_gene_variant	MODIFIER	R74.9
550	III	5114380	C	A	missense_variant	MODERATE	sax-2
550	III	7342266	T	A	missense_variant	MODERATE	kap-1
550	III	9044038	C	T	synonymous_variant	LOW	R107.2
550	III	10102455	C	T	upstream_gene_variant	MODIFIER	bath-43
550	III	11312201	A	T	upstream_gene_variant	MODIFIER	rab-35
550	IV	3667783	A	T	upstream_gene_variant	MODIFIER	Y37E11AL.6
550	IV	6736395	T	C	upstream_gene_variant	MODIFIER	Y73B6A.2
550	IV	7429672	C	G	upstream_gene_variant	MODIFIER	B0496.12
550	IV	11450825	T	A	downstream_gene_variant	MODIFIER	kin-4
550	IV	12125043	G	A	missense_variant	MODERATE	dhhc-6
550	IV	12354661	A	T	downstream_gene_variant	MODIFIER	sec-24.2
550	IV	12354662	G	A	downstream_gene_variant	MODIFIER	sec-24.2
550	IV	16380921	G	T	upstream_gene_variant	MODIFIER	21ur-13920
550	V	585703	G	A	upstream_gene_variant	MODIFIER	K06H6.6
550	V	746373	C	T	upstream_gene_variant	MODIFIER	str-133
550	V	4743374	C	T	missense_variant	MODERATE	ugt-61
550	V	5139959	G	A	upstream_gene_variant	MODIFIER	F14F9.2
550	V	6810107	T	A	upstream_gene_variant	MODIFIER	dmsr-12
550	V	8024116	T	A	upstream_gene_variant	MODIFIER	F43H9.4
550	V	8386062	A	C	upstream_gene_variant	MODIFIER	hsp-17
550	V	8732569	A	G	upstream_gene_variant	MODIFIER	ZC196.4
550	V	10519142	T	C	upstream_gene_variant	MODIFIER	dmsr-8
550	V	12606180	A	G	synonymous_variant	LOW	C14C10.5
550	V	16494087	G	A	missense_variant	MODERATE	comt-2
550	V	18288990	T	A	upstream_gene_variant	MODIFIER	Y51A2A.2
550	V	18288994	T	A	upstream_gene_variant	MODIFIER	Y51A2A.2
550	V	18289001	C	T	upstream_gene_variant	MODIFIER	Y51A2A.2
550	V	18328968	A	G	downstream_gene_variant	MODIFIER	B0462.1
550	V	19242847	T	C	upstream_gene_variant	MODIFIER	fbxb-115
550	X	2836739	C	T	missense_variant	MODERATE	Y71H10B.1
550	X	10311540	C	A	missense_variant	MODERATE	F41E7.7
550	X	12809408	G	A	missense_variant	MODERATE	gei-3
587	I	6385720	A	T	3_prime_UTR_variant	MODIFIER	gld-2
587	I	9276088	G	T	upstream_gene_variant	MODIFIER	F14B4.2
587	I	11785931	T	G	upstream_gene_variant	MODIFIER	vab-10
587	I	12627343	A	G	missense_variant	MODERATE	T07D10.3
587	I	12627345	G	T	splice_region_variant&synonymous_variant	LOW	T07D10.3
587	I	13489923	G	A	missense_variant	MODERATE	Y48G10A.1
587	I	14517934	G	C	intron_variant	MODIFIER	exc-4
587	II	2465508	C	A	downstream_gene_variant	MODIFIER	mir-8195
587	II	4627747	A	C	3_prime_UTR_variant	MODIFIER	F35D11.1
587	II	5533550	T	A	upstream_gene_variant	MODIFIER	C17C3.9
587	II	7829898	A	G	upstream_gene_variant	MODIFIER	T09A5.14
587	II	7834777	G	A	upstream_gene_variant	MODIFIER	T09A5.21
587	III	521061	T	G	missense_variant	MODERATE	T22F7.3
587	III	854750	A	T	upstream_gene_variant	MODIFIER	moma-1
587	III	1690552	A	G	upstream_gene_variant	MODIFIER	Y22D7AR.7
587	III	2042881	T	C	missense_variant	MODERATE	dpy-1
587	III	2922429	A	T	upstream_gene_variant	MODIFIER	R10F2.4
587	III	4348974	A	T	missense_variant	MODERATE	hse-5
587	III	6705701	A	C	upstream_gene_variant	MODIFIER	F37A4.6
587	III	9694358	C	G	missense_variant&splice_region_variant	MODERATE	set-3
587	III	10197017	A	T	upstream_gene_variant	MODIFIER	dod-6
587	IV	1775684	T	A	downstream_gene_variant	MODIFIER	Y41D4A.1
587	IV	2176368	T	A	upstream_gene_variant	MODIFIER	C54E4.6
587	IV	4694587	T	A	downstream_gene_variant	MODIFIER	bus-4
587	IV	5736401	G	A	upstream_gene_variant	MODIFIER	H35B03.2
587	IV	8494057	A	T	missense_variant	MODERATE	sru-7
587	IV	8494063	T	A	missense_variant	MODERATE	sru-7
587	IV	8775863	C	T	synonymous_variant	LOW	C33D9.6
587	V	3640916	T	A	upstream_gene_variant	MODIFIER	srx-41
587	V	5195292	C	A	upstream_gene_variant	MODIFIER	C03A7.13
587	V	5287782	G	T	upstream_gene_variant	MODIFIER	Y49G5A.1
587	V	5886559	G	A	upstream_gene_variant	MODIFIER	C04E6.8
587	V	9853862	A	T	upstream_gene_variant	MODIFIER	T11A5.8
587	V	10132245	G	A	synonymous_variant	LOW	wdr-20
587	V	11864393	C	G	missense_variant	MODERATE	R13H4.6
587	V	15161514	T	G	upstream_gene_variant	MODIFIER	srz-11
587	V	16264699	T	G	downstream_gene_variant	MODIFIER	nhr-218
587	V	16546904	G	A	upstream_gene_variant	MODIFIER	srbc-65
587	X	2126980	C	A	upstream_gene_variant	MODIFIER	F53B1.t1
587	X	4291925	T	A	upstream_gene_variant	MODIFIER	C52B9.17
587	X	5029235	T	G	downstream_gene_variant	MODIFIER	ZC449.2
587	X	5614261	T	A	upstream_gene_variant	MODIFIER	octr-1
587	X	8809905	T	A	upstream_gene_variant	MODIFIER	R04E5.8
587	X	10305064	A	T	upstream_gene_variant	MODIFIER	cnc-8
587	X	12660479	C	T	missense_variant	MODERATE	C02B4.3
587	X	12876269	C	T	upstream_gene_variant	MODIFIER	K02A4.5
505	I	741137	C	G	upstream_gene_variant	MODIFIER	Y18H1A.15
505	I	3801800	A	C	upstream_gene_variant	MODIFIER	C32E8.9
505	I	4482021	A	T	upstream_gene_variant	MODIFIER	21ur-14920
505	I	7840854	A	T	upstream_gene_variant	MODIFIER	F30F8.t1
505	I	10525200	G	A	upstream_gene_variant	MODIFIER	F59C6.14
505	I	11411779	G	T	downstream_gene_variant	MODIFIER	Y53H1C.8
505	I	12316825	G	A	upstream_gene_variant	MODIFIER	C47F8.3
505	II	565188	C	T	upstream_gene_variant	MODIFIER	anr-27
505	II	1427769	G	T	upstream_gene_variant	MODIFIER	Y51H7C.10
505	II	1906868	G	A	upstream_gene_variant	MODIFIER	math-30
505	II	4257885	A	G	upstream_gene_variant	MODIFIER	C16A11.7
505	II	10259203	C	T	synonymous_variant	LOW	F54B3.1
505	II	12976560	G	A	upstream_gene_variant	MODIFIER	cyd-1
505	III	4832155	G	T	upstream_gene_variant	MODIFIER	F26A1.9
505	III	7777093	C	T	3_prime_UTR_variant	MODIFIER	mab-5
505	III	8031513	C	T	missense_variant	MODERATE	F44B9.10
505	III	10370668	A	C	intron_variant	MODIFIER	tbc-8
505	IV	2215054	T	A	downstream_gene_variant	MODIFIER	T04C4.3
505	IV	4242081	G	A	upstream_gene_variant	MODIFIER	linc-26
505	IV	4277018	T	A	upstream_gene_variant	MODIFIER	21ur-11903
505	IV	4906106	A	C	missense_variant	MODERATE	T08B6.4
505	IV	5547494	C	T	upstream_gene_variant	MODIFIER	T12E12.1
505	IV	5804542	T	G	upstream_gene_variant	MODIFIER	21ur-6835
505	IV	6072079	T	C	upstream_gene_variant	MODIFIER	21ur-14188
505	IV	8127938	T	A	upstream_gene_variant	MODIFIER	moc-3
505	IV	14411109	G	T	missense_variant	MODERATE	F55B11.1
505	IV	14422399	A	G	missense_variant	MODERATE	F55B11.2
505	IV	15101017	T	A	upstream_gene_variant	MODIFIER	srt-49
505	IV	16025283	C	G	upstream_gene_variant	MODIFIER	21ur-606
505	V	4708011	A	C	upstream_gene_variant	MODIFIER	oac-24
505	V	5025486	G	T	missense_variant	MODERATE	cpt-4
505	V	7409947	T	G	synonymous_variant	LOW	R13D7.2
505	V	12697285	G	A	5_prime_UTR_variant	MODIFIER	istr-1
505	V	13003474	C	A	missense_variant	MODERATE	inft-2
505	V	13589064	C	A	upstream_gene_variant	MODIFIER	F53F4.18
505	V	20423070	C	T	upstream_gene_variant	MODIFIER	fce-2
505	X	29480	T	A	intron_variant	MODIFIER	Y35H6.3
505	X	378116	C	T	downstream_gene_variant	MODIFIER	nrde-3
505	X	689288	A	T	upstream_gene_variant	MODIFIER	ncam-1
505	X	8673448	T	G	upstream_gene_variant	MODIFIER	K09E2.6
505	X	9443277	A	T	upstream_gene_variant	MODIFIER	memb-1
505	X	16347212	C	A	downstream_gene_variant	MODIFIER	taf-3
512	I	851123	A	G	upstream_gene_variant	MODIFIER	ZC123.4
512	I	2559198	T	G	upstream_gene_variant	MODIFIER	C55C2.3
512	I	4314343	C	G	downstream_gene_variant	MODIFIER	T03A1.5
512	I	7200071	T	A	upstream_gene_variant	MODIFIER	C01H6.10
512	I	8245626	T	C	upstream_gene_variant	MODIFIER	kri-1
512	I	10775113	G	C	splice_region_variant	LOW	daf-16
512	I	12391928	G	A	upstream_gene_variant	MODIFIER	T15D6.9
512	II	798867	G	T	upstream_gene_variant	MODIFIER	F46F5.2
512	II	882708	G	T	upstream_gene_variant	MODIFIER	T07D3.5
512	II	6781651	T	C	3_prime_UTR_variant	MODIFIER	T13C2.7
512	II	9441275	G	A	upstream_gene_variant	MODIFIER	chil-13
512	II	10955716	T	G	upstream_gene_variant	MODIFIER	nos-1
512	II	13101841	G	C	missense_variant	MODERATE	rict-1
512	II	13850073	A	C	upstream_gene_variant	MODIFIER	F08G2.16
512	III	1270908	T	G	upstream_gene_variant	MODIFIER	fbxa-151
512	III	1755613	T	A	upstream_gene_variant	MODIFIER	Y46E12A.3
512	III	1992299	A	T	downstream_gene_variant	MODIFIER	Y39A3B.3
512	III	2473120	G	A	upstream_gene_variant	MODIFIER	E02H9.9
512	III	5859122	T	A	3_prime_UTR_variant	MODIFIER	alh-9
512	III	7645861	A	G	upstream_gene_variant	MODIFIER	upp-1
512	III	9446871	G	T	upstream_gene_variant	MODIFIER	F54C8.4
512	III	12858638	C	T	upstream_gene_variant	MODIFIER	Y37D8A.5
512	III	12995179	T	C	upstream_gene_variant	MODIFIER	col-97
512	IV	5314082	A	C	upstream_gene_variant	MODIFIER	msp-59
512	IV	5331886	G	A	upstream_gene_variant	MODIFIER	21ur-13094
512	IV	5701734	G	A	upstream_gene_variant	MODIFIER	21ur-6015
512	IV	7388771	G	A	upstream_gene_variant	MODIFIER	21ur-10817
512	IV	8424354	T	G	upstream_gene_variant	MODIFIER	M116.5
512	IV	9762523	G	A	upstream_gene_variant	MODIFIER	21ur-12235
512	IV	10413598	C	T	upstream_gene_variant	MODIFIER	R10H10.6
512	IV	12020906	C	T	intergenic_region	MODIFIER	lips-6-T12G3.7
512	IV	16904170	G	C	upstream_gene_variant	MODIFIER	21ur-6458
512	V	738390	C	A	upstream_gene_variant	MODIFIER	srj-25
512	V	1951982	T	G	upstream_gene_variant	MODIFIER	T06A1.9
512	V	2029573	A	G	upstream_gene_variant	MODIFIER	srab-13
512	V	3786232	G	A	upstream_gene_variant	MODIFIER	R08F11.1
512	V	4301602	A	G	synonymous_variant	LOW	ZC132.4
512	V	5116258	C	T	synonymous_variant	LOW	C04F5.9
512	V	7131795	G	A	upstream_gene_variant	MODIFIER	T01C4.8
512	V	8805955	A	G	splice_donor_variant&intron_variant	HIGH	rpm-1
512	V	9029780	A	T	upstream_gene_variant	MODIFIER	bus-1
512	V	19619546	C	T	downstream_gene_variant	MODIFIER	Y43F8C.t8
512	X	1290884	A	T	upstream_gene_variant	MODIFIER	dop-4
512	X	1809245	T	A	downstream_gene_variant	MODIFIER	C14E2.11
512	X	10572090	C	G	missense_variant	MODERATE	bet-2
512	X	17459497	G	T	missense_variant	MODERATE	mlc-1
513	I	2386412	A	T	upstream_gene_variant	MODIFIER	sydn-1
513	I	4392734	A	G	intron_variant	MODIFIER	dhc-1
513	I	4439471	C	T	intron_variant	MODIFIER	C41D11.3
513	I	4604639	T	C	upstream_gene_variant	MODIFIER	nrd-1
513	I	5436876	G	A	synonymous_variant	LOW	F27C1.11
513	I	5441213	T	C	synonymous_variant	LOW	F27C1.11
513	I	6059119	T	A	missense_variant	MODERATE	ari-1
513	I	6607239	C	G	missense_variant	MODERATE	maco-1
513	I	7744661	A	T	intergenic_region	MODIFIER	21ur-12039-F58H10.1
513	I	9194843	A	T	upstream_gene_variant	MODIFIER	lim-9
513	I	14115250	C	T	synonymous_variant	LOW	Y63D3A.8
513	II	8260665	C	T	upstream_gene_variant	MODIFIER	F35C11.12
513	II	10869942	T	A	upstream_gene_variant	MODIFIER	gmps-1
513	II	12852532	A	T	upstream_gene_variant	MODIFIER	pes-10
513	II	13198785	G	A	upstream_gene_variant	MODIFIER	W09H1.7
513	II	13301885	A	C	missense_variant	MODERATE	Y48C3A.5
513	II	13728688	T	A	upstream_gene_variant	MODIFIER	Y54G9A.7
513	III	1113233	G	A	missense_variant	MODERATE	F58B6.1
513	III	1493444	G	T	upstream_gene_variant	MODIFIER	M01G5.1
513	III	1760029	A	T	upstream_gene_variant	MODIFIER	Y46E12A.5
513	III	5563369	A	T	upstream_gene_variant	MODIFIER	mlc-3
513	III	6092198	A	C	upstream_gene_variant	MODIFIER	wht-1
513	III	6249347	A	T	splice_region_variant&intron_variant	LOW	stt-3
513	III	6345681	A	G	upstream_gene_variant	MODIFIER	C56G2.7
513	III	8533171	A	C	upstream_gene_variant	MODIFIER	ZC21.15
513	III	9738289	A	T	upstream_gene_variant	MODIFIER	dao-6
513	III	10578152	A	T	upstream_gene_variant	MODIFIER	Y45F3A.4
513	III	13028224	C	T	upstream_gene_variant	MODIFIER	F14F7.7
513	III	13365575	G	A	synonymous_variant	LOW	T03F6.7
513	III	13659696	A	T	upstream_gene_variant	MODIFIER	ZK525.5
513	IV	3257830	T	A	upstream_gene_variant	MODIFIER	dmd-9
513	IV	3997965	A	G	upstream_gene_variant	MODIFIER	F47C12.11
513	IV	8615048	G	A	synonymous_variant	LOW	cyp-33E3
513	IV	10318681	T	C	upstream_gene_variant	MODIFIER	R09E10.9
513	IV	10635106	T	C	upstream_gene_variant	MODIFIER	F56C4.4
513	IV	10679290	A	T	splice_region_variant&intron_variant	LOW	epi-1
513	IV	11093315	T	C	upstream_gene_variant	MODIFIER	bcc-1
513	IV	12822426	A	T	upstream_gene_variant	MODIFIER	F07C6.4
513	IV	15791945	A	G	upstream_gene_variant	MODIFIER	21ur-10361
513	IV	17327198	T	A	splice_region_variant&intron_variant	LOW	C49C3.4
513	V	1697231	A	T	upstream_gene_variant	MODIFIER	Y46H3C.7
513	V	1697232	A	T	upstream_gene_variant	MODIFIER	Y46H3C.7
513	V	3428793	T	A	upstream_gene_variant	MODIFIER	srab-21
513	V	3940281	G	A	missense_variant	MODERATE	cyp-35B1
513	V	6060544	T	A	downstream_gene_variant	MODIFIER	srd-20
513	V	7244703	T	A	downstream_gene_variant	MODIFIER	C05C8.1
513	V	10821935	A	T	upstream_gene_variant	MODIFIER	C29A12.9
513	V	11011349	A	T	upstream_gene_variant	MODIFIER	C13G3.10
513	V	12946955	C	A	3_prime_UTR_variant	MODIFIER	T16G1.9
513	V	13276312	T	C	synonymous_variant	LOW	uig-1
513	V	13358269	G	C	upstream_gene_variant	MODIFIER	F32H5.1
513	V	14509859	G	T	upstream_gene_variant	MODIFIER	R02D5.23
513	V	15548275	G	A	upstream_gene_variant	MODIFIER	glb-14
513	V	15564434	C	T	upstream_gene_variant	MODIFIER	acs-2
513	V	16415236	A	G	downstream_gene_variant	MODIFIER	F26D2.3
513	V	19803738	A	T	upstream_gene_variant	MODIFIER	Y116F11B.2
513	X	45267	G	C	upstream_gene_variant	MODIFIER	Y73B3A.20
513	X	6290538	G	A	missense_variant	MODERATE	lev-9
513	X	6368938	A	T	upstream_gene_variant	MODIFIER	sup-7
513	X	6758706	G	T	intron_variant	MODIFIER	abts-4
513	X	7871974	T	A	upstream_gene_variant	MODIFIER	EGAP3.3
513	X	12050507	G	A	upstream_gene_variant	MODIFIER	B0198.3
513	X	12307402	A	C	missense_variant	MODERATE	phf-32
513	X	15556636	T	A	upstream_gene_variant	MODIFIER	lron-3
520	I	175676	G	A	missense_variant	MODERATE	F56C11.6
520	I	792308	T	A	downstream_gene_variant	MODIFIER	T06A4.7
520	I	920386	G	A	upstream_gene_variant	MODIFIER	Y95B8A.12
520	I	1608230	C	T	upstream_gene_variant	MODIFIER	adpr-1
520	I	1927785	C	T	upstream_gene_variant	MODIFIER	Y51F10.4
520	I	3489525	A	T	intron_variant	MODIFIER	Y47G6A.17
520	I	3519665	G	C	missense_variant	MODERATE	pcaf-1
520	I	4062262	T	A	upstream_gene_variant	MODIFIER	21ur-14824
520	I	4062263	G	A	upstream_gene_variant	MODIFIER	21ur-14824
520	I	8474538	G	C	missense_variant	MODERATE	D1081.12
520	I	8674679	G	A	upstream_gene_variant	MODIFIER	K07A12.8
520	I	11263996	C	T	upstream_gene_variant	MODIFIER	F36D1.8
520	I	13909626	C	G	synonymous_variant	LOW	trp-4
520	II	4503312	A	C	synonymous_variant	LOW	camt-1
520	II	4999024	T	G	upstream_gene_variant	MODIFIER	F59A6.11
520	II	5291214	C	T	upstream_gene_variant	MODIFIER	ZK622.7
520	II	5841408	G	A	upstream_gene_variant	MODIFIER	ZK1248.15
520	II	8828373	T	A	missense_variant	MODERATE	F46C5.2
520	II	9395298	A	G	upstream_gene_variant	MODIFIER	C06C3.8
520	II	11279294	G	C	upstream_gene_variant	MODIFIER	unc-130
520	II	11524084	T	A	downstream_gene_variant	MODIFIER	B0334.10
520	II	12342241	G	A	synonymous_variant	LOW	sop-2
520	II	12757766	T	A	upstream_gene_variant	MODIFIER	Y46G5A.39
520	II	12875006	A	T	intron_variant	MODIFIER	gsy-1
520	III	1162251	G	A	upstream_gene_variant	MODIFIER	Y92C3A.8
520	III	2019313	G	A	upstream_gene_variant	MODIFIER	ckr-2
520	III	4366285	A	G	synonymous_variant	LOW	ckb-1
520	III	7032839	G	A	upstream_gene_variant	MODIFIER	cyk-1
520	III	8034006	G	T	upstream_gene_variant	MODIFIER	F44B9.8
520	III	9660108	C	A	upstream_gene_variant	MODIFIER	C15H7.4
520	III	10169386	C	T	downstream_gene_variant	MODIFIER	K08E5.8
520	III	10324207	A	C	missense_variant	MODERATE	T07C4.10
520	III	11819422	T	A	upstream_gene_variant	MODIFIER	C18D11.3
520	III	13637085	G	A	upstream_gene_variant	MODIFIER	T12D8.12
520	IV	1232664	G	A	missense_variant	MODERATE	W09G12.6
520	IV	1909193	G	A	upstream_gene_variant	MODIFIER	F55A8.5
520	IV	2552315	G	A	upstream_gene_variant	MODIFIER	Y69A2AR.23
520	IV	3597269	C	T	missense_variant	MODERATE	Y37E11B.5
520	IV	4022147	G	C	upstream_gene_variant	MODIFIER	hlh-30
520	IV	4022150	C	T	upstream_gene_variant	MODIFIER	hlh-30
520	IV	7779288	T	A	upstream_gene_variant	MODIFIER	C33H5.8
520	IV	8514580	C	A	3_prime_UTR_variant	MODIFIER	cks-1
520	IV	10639759	A	T	downstream_gene_variant	MODIFIER	F56C4.1
520	IV	12509177	A	G	upstream_gene_variant	MODIFIER	F53B2.7
520	IV	12631317	A	G	upstream_gene_variant	MODIFIER	ark-1
520	IV	12819923	C	A	upstream_gene_variant	MODIFIER	F07C6.4
520	IV	13414496	T	A	missense_variant	MODERATE	aptf-2
520	IV	15803676	A	C	upstream_gene_variant	MODIFIER	Y105C5A.22
520	IV	16377974	T	A	upstream_gene_variant	MODIFIER	21ur-2018
520	V	836162	G	T	missense_variant	MODERATE	K09C6.7
520	V	1351806	T	A	upstream_gene_variant	MODIFIER	Y75B7AL.7
520	V	1351807	T	A	upstream_gene_variant	MODIFIER	Y75B7AL.7
520	V	5109135	A	C	stop_gained	HIGH	ugt-63
520	V	6205688	A	G	missense_variant	MODERATE	W06H8.4
520	V	7225740	A	T	upstream_gene_variant	MODIFIER	C13F10.6
520	V	9470860	T	C	upstream_gene_variant	MODIFIER	flp-6
520	V	9740705	G	T	upstream_gene_variant	MODIFIER	sta-2
520	V	10094753	G	T	missense_variant	MODERATE	srd-49
520	V	10498228	A	T	downstream_gene_variant	MODIFIER	aqp-5
520	V	13524632	C	G	upstream_gene_variant	MODIFIER	C56A3.9
520	V	14248289	C	A	upstream_gene_variant	MODIFIER	K02E11.3
520	V	14288566	T	A	downstream_gene_variant	MODIFIER	F40G12.10
520	V	15887251	C	T	upstream_gene_variant	MODIFIER	oac-42
520	V	16754758	A	T	upstream_gene_variant	MODIFIER	dkf-2
520	V	16876556	G	A	upstream_gene_variant	MODIFIER	F09C6.14
520	V	18257392	T	A	upstream_gene_variant	MODIFIER	R10E8.9
520	V	18697600	G	A	upstream_gene_variant	MODIFIER	Y69H2.26
520	V	19910911	G	A	missense_variant&splice_region_variant	MODERATE	chk-2
520	X	1826303	T	A	upstream_gene_variant	MODIFIER	C14E2.4
520	X	1844899	T	G	synonymous_variant	LOW	T26C11.4
520	X	4812042	C	G	upstream_gene_variant	MODIFIER	ztf-16
520	X	5567141	T	A	downstream_gene_variant	MODIFIER	C38C5.3
520	X	8364515	G	T	upstream_gene_variant	MODIFIER	F40B5.2
520	X	9717331	C	T	upstream_gene_variant	MODIFIER	F15G9.2
520	X	13000304	A	G	downstream_gene_variant	MODIFIER	F11C1.5
523	I	2597272	A	T	upstream_gene_variant	MODIFIER	ptr-12
523	I	3638055	A	T	upstream_gene_variant	MODIFIER	jmjc-1
523	I	4501231	G	A	upstream_gene_variant	MODIFIER	T01A4.6
523	I	6165547	G	A	missense_variant	MODERATE	T09B4.8
523	I	6478234	G	T	upstream_gene_variant	MODIFIER	sulp-1
523	I	6677906	C	A	upstream_gene_variant	MODIFIER	C17F3.3
523	I	11855553	G	A	upstream_gene_variant	MODIFIER	ced-1
523	II	2903777	T	A	missense_variant	MODERATE	Y110A2AM.1
523	II	3330029	C	A	missense_variant	MODERATE	irld-5
523	II	4378405	A	T	upstream_gene_variant	MODIFIER	ntl-2
523	II	9893660	A	G	missense_variant	MODERATE	C08H9.16
523	II	12935467	A	T	upstream_gene_variant	MODIFIER	lips-9
523	II	13530944	G	A	synonymous_variant	LOW	snx-14
523	III	67800	G	A	upstream_gene_variant	MODIFIER	pck-1
523	III	1880282	A	T	missense_variant	MODERATE	smi-1
523	III	2602993	T	A	upstream_gene_variant	MODIFIER	Y71H2B.11
523	III	3591597	G	A	upstream_gene_variant	MODIFIER	C48D5.6
523	III	6941626	A	T	missense_variant	MODERATE	F57B9.3
523	III	9502616	A	T	upstream_gene_variant	MODIFIER	sod-4
523	III	9961404	G	A	missense_variant	MODERATE	alx-1
523	III	9980273	A	T	upstream_gene_variant	MODIFIER	R10E12.10
523	III	10696088	G	C	synonymous_variant	LOW	fmo-3
523	III	11068428	G	C	upstream_gene_variant	MODIFIER	W09D6.t2
523	III	12433303	C	T	upstream_gene_variant	MODIFIER	snr-6
523	III	13155144	G	C	upstream_gene_variant	MODIFIER	Y39E4B.10
523	IV	227203	A	C	upstream_gene_variant	MODIFIER	R02D3.3
523	IV	3490655	A	T	upstream_gene_variant	MODIFIER	srz-78
523	IV	4275391	C	T	missense_variant	MODERATE	nhr-78
523	IV	4873573	C	T	synonymous_variant	LOW	str-174
523	IV	4873576	T	C	synonymous_variant	LOW	str-174
523	IV	4873581	G	A	missense_variant	MODERATE	str-174
523	IV	4873585	A	C	missense_variant	MODERATE	str-174
523	IV	4873586	C	A	missense_variant	MODERATE	str-174
523	IV	5967499	T	A	upstream_gene_variant	MODIFIER	21ur-10061
523	IV	7096998	A	T	upstream_gene_variant	MODIFIER	deb-1
523	IV	7513169	T	A	upstream_gene_variant	MODIFIER	plc-4
523	IV	11556236	A	C	upstream_gene_variant	MODIFIER	col-128
523	IV	14010124	C	A	upstream_gene_variant	MODIFIER	21ur-12477
523	IV	15945981	A	T	upstream_gene_variant	MODIFIER	Y105C5B.11
523	IV	16058575	A	T	upstream_gene_variant	MODIFIER	21ur-14971
523	V	680235	C	G	upstream_gene_variant	MODIFIER	fbxa-72
523	V	1282400	C	T	stop_gained	HIGH	pme-5
523	V	3311137	A	G	synonymous_variant	LOW	arrd-18
523	V	4319295	G	A	upstream_gene_variant	MODIFIER	srh-192
523	V	6443412	G	T	missense_variant	MODERATE	T05H4.3
523	V	12758305	C	G	upstream_gene_variant	MODIFIER	gpa-13
523	V	13548729	A	T	upstream_gene_variant	MODIFIER	C56A3.5
523	V	15010669	T	A	synonymous_variant	LOW	nmr-2
523	V	15981163	T	C	splice_region_variant&intron_variant	LOW	oac-20
523	V	18989326	T	C	missense_variant	MODERATE	reps-1
523	X	90638	C	A	upstream_gene_variant	MODIFIER	Y73B3A.25
523	X	2269230	C	T	upstream_gene_variant	MODIFIER	AH9.6
523	X	3697757	C	A	missense_variant	MODERATE	C02F12.t1
523	X	4428548	C	T	upstream_gene_variant	MODIFIER	F15A8.18
523	X	5338920	C	T	upstream_gene_variant	MODIFIER	C26B9.6
523	X	5725709	T	A	upstream_gene_variant	MODIFIER	C41G11.9
523	X	5848951	T	A	upstream_gene_variant	MODIFIER	W06B11.8
523	X	6074310	G	A	upstream_gene_variant	MODIFIER	C45B2.11
523	X	6539032	T	G	upstream_gene_variant	MODIFIER	ilys-5
523	X	7570729	T	C	missense_variant	MODERATE	unc-98
523	X	8331448	C	A	upstream_gene_variant	MODIFIER	R09F10.8
523	X	9388255	C	A	upstream_gene_variant	MODIFIER	C23F12.3
523	X	9409942	A	G	splice_region_variant&synonymous_variant	LOW	fln-2
523	X	9521640	T	A	upstream_gene_variant	MODIFIER	C07B5.2
523	X	10800225	G	T	missense_variant	MODERATE	plc-1
523	X	13403574	T	A	upstream_gene_variant	MODIFIER	F02C12.2
523	X	14273829	G	A	missense_variant	MODERATE	del-1
523	X	15043949	A	T	missense_variant	MODERATE	fbxa-97
523	X	16325283	T	C	upstream_gene_variant	MODIFIER	C11G6.2
524	I	1271873	C	T	upstream_gene_variant	MODIFIER	grh-1
524	I	3662863	C	T	upstream_gene_variant	MODIFIER	acd-5
524	I	4471153	G	T	upstream_gene_variant	MODIFIER	linc-104
524	I	6175022	A	G	upstream_gene_variant	MODIFIER	mir-1
524	I	7424988	T	A	missense_variant	MODERATE	unc-13
524	I	9661648	T	G	missense_variant	MODERATE	npp-14
524	I	9706000	A	T	upstream_gene_variant	MODIFIER	C04F12.15
524	I	9854582	G	A	upstream_gene_variant	MODIFIER	ensa-1
524	I	11832803	C	T	upstream_gene_variant	MODIFIER	T02G6.7
524	I	11839759	G	A	downstream_gene_variant	MODIFIER	Y47H9C.20
524	I	13507181	T	A	upstream_gene_variant	MODIFIER	Y87G2A.19
524	I	14447753	C	T	downstream_gene_variant	MODIFIER	Y105E8A.27
524	II	2959793	A	T	upstream_gene_variant	MODIFIER	hpa-2
524	II	3505967	A	T	upstream_gene_variant	MODIFIER	col-71
524	II	5087054	A	T	upstream_gene_variant	MODIFIER	C04G6.4
524	II	5581877	T	A	missense_variant	MODERATE	T25E4.2
524	II	6528842	G	A	3_prime_UTR_variant	MODIFIER	abch-1
524	II	6972338	G	A	upstream_gene_variant	MODIFIER	ppp-1
524	II	7025456	C	T	upstream_gene_variant	MODIFIER	lst-6
524	II	8793092	G	A	3_prime_UTR_variant	MODIFIER	F07H5.7
524	II	11332014	C	T	upstream_gene_variant	MODIFIER	tag-180
524	II	14923277	G	C	upstream_gene_variant	MODIFIER	pde-3
524	III	304245	C	T	intron_variant	MODIFIER	Y50D7A.1
524	III	1556770	A	T	upstream_gene_variant	MODIFIER	Y67D2.6
524	III	2015340	G	T	intron_variant	MODIFIER	ckr-2
524	III	2017016	A	T	upstream_gene_variant	MODIFIER	ckr-2
524	III	5683683	A	T	synonymous_variant	LOW	rcn-1
524	III	5915120	A	C	upstream_gene_variant	MODIFIER	C28H8.14
524	III	8201664	A	G	upstream_gene_variant	MODIFIER	unc-36
524	III	9675094	T	A	downstream_gene_variant	MODIFIER	ugt-60
524	III	9675139	A	T	downstream_gene_variant	MODIFIER	ugt-60
524	IV	640775	C	G	intergenic_region	MODIFIER	nhr-76-K11H12.9
524	IV	2316216	A	T	upstream_gene_variant	MODIFIER	vha-11
524	IV	2937355	C	T	downstream_gene_variant	MODIFIER	samt-1
524	IV	3847333	C	T	upstream_gene_variant	MODIFIER	21ur-14375
524	IV	4999873	C	T	upstream_gene_variant	MODIFIER	21ur-11202
524	IV	6263167	T	A	upstream_gene_variant	MODIFIER	nlp-16
524	IV	7435296	A	G	upstream_gene_variant	MODIFIER	B0496.11
524	IV	10192739	A	G	upstream_gene_variant	MODIFIER	K04D7.12
524	IV	12134420	G	A	upstream_gene_variant	MODIFIER	B0001.12
524	IV	12921484	C	T	missense_variant	MODERATE	C32H11.4
524	IV	14786037	A	T	upstream_gene_variant	MODIFIER	Y57G11C.57
524	IV	17274334	T	A	upstream_gene_variant	MODIFIER	gln-5
524	V	645490	C	A	missense_variant	MODERATE	F48G7.12
524	V	1513774	C	T	upstream_gene_variant	MODIFIER	nhr-260
524	V	2145409	T	G	upstream_gene_variant	MODIFIER	srbc-20
524	V	2612078	A	G	upstream_gene_variant	MODIFIER	F53E10.1
524	V	4131778	C	T	upstream_gene_variant	MODIFIER	T05B4.13
524	V	4845637	C	T	upstream_gene_variant	MODIFIER	cwp-1
524	V	8305846	T	A	upstream_gene_variant	MODIFIER	W02D7.6
524	V	10000493	A	G	upstream_gene_variant	MODIFIER	K08H10.6
524	V	10358253	C	T	upstream_gene_variant	MODIFIER	K07C5.6
524	V	10444391	T	A	upstream_gene_variant	MODIFIER	snf-10
524	V	10643425	G	T	missense_variant	MODERATE	C32C4.1
524	V	11001296	T	G	missense_variant	MODERATE	F53B7.4
524	V	11916119	G	A	missense_variant	MODERATE	sma-1
524	V	14594681	G	T	upstream_gene_variant	MODIFIER	R11H6.6
524	V	14671840	T	A	upstream_gene_variant	MODIFIER	C47E8.10
524	V	17687123	T	A	upstream_gene_variant	MODIFIER	F59A1.15
524	V	18703136	A	T	upstream_gene_variant	MODIFIER	Y69H2.16
524	V	18953859	A	T	downstream_gene_variant	MODIFIER	ztf-20
524	V	19534744	C	T	upstream_gene_variant	MODIFIER	Y43F8B.2
524	X	3331071	T	C	upstream_gene_variant	MODIFIER	F11D5.6
524	X	3441976	C	T	missense_variant	MODERATE	ZK813.3
524	X	3480738	T	A	upstream_gene_variant	MODIFIER	ZK377.12
524	X	5376495	C	T	missense_variant	MODERATE	sek-4
524	X	5461990	G	C	upstream_gene_variant	MODIFIER	C25F6.20
524	X	5570567	C	T	upstream_gene_variant	MODIFIER	C38C5.3
524	X	8047154	A	T	downstream_gene_variant	MODIFIER	xol-1
524	X	8859164	T	C	upstream_gene_variant	MODIFIER	C06E2.5
524	X	9067386	C	T	upstream_gene_variant	MODIFIER	linc-22
524	X	12184945	C	T	upstream_gene_variant	MODIFIER	F57G12.8
524	X	12248107	C	T	upstream_gene_variant	MODIFIER	E01G6.11
524	X	14553863	C	A	upstream_gene_variant	MODIFIER	T24C2.9
526	I	162139	T	G	intron_variant	MODIFIER	ptr-11
526	I	332079	T	C	upstream_gene_variant	MODIFIER	daf-25
526	I	846345	C	T	upstream_gene_variant	MODIFIER	ZC123.4
526	I	3940816	C	A	missense_variant	MODERATE	lrp-2
526	I	8461456	G	A	upstream_gene_variant	MODIFIER	D1081.15
526	I	9140169	A	T	missense_variant	MODERATE	ZK858.6
526	I	10709206	C	T	missense_variant	MODERATE	B0205.10
526	I	13234106	C	G	upstream_gene_variant	MODIFIER	ZK1053.1
526	I	13725954	A	C	upstream_gene_variant	MODIFIER	hsd-1
526	I	13726960	G	T	missense_variant	MODERATE	lagr-1
526	I	13897999	T	A	upstream_gene_variant	MODIFIER	trp-4
526	II	4595617	A	T	downstream_gene_variant	MODIFIER	vab-1
526	II	4719626	G	A	missense_variant	MODERATE	F10G7.10
526	II	5642880	C	A	missense_variant	MODERATE	F59E12.9
526	II	7358266	G	C	upstream_gene_variant	MODIFIER	haf-2
526	II	8602443	A	G	5_prime_UTR_variant	MODIFIER	cpf-1
526	II	14439995	C	T	upstream_gene_variant	MODIFIER	K04B12.2
526	II	14986605	A	T	upstream_gene_variant	MODIFIER	Y53F4B.5
526	III	3284337	C	T	upstream_gene_variant	MODIFIER	Y53G8AR.7
526	III	3755300	C	T	missense_variant	MODERATE	F34D10.6
526	III	4220314	C	T	upstream_gene_variant	MODIFIER	mpk-1
526	III	6232740	A	T	upstream_gene_variant	MODIFIER	esyt-2
526	III	9609873	A	G	upstream_gene_variant	MODIFIER	clec-161
526	III	9941583	C	A	upstream_gene_variant	MODIFIER	21ur-13400
526	III	12420865	A	T	upstream_gene_variant	MODIFIER	tat-1
526	III	12622684	A	T	splice_region_variant	LOW	Y111B2A.12
526	IV	3268609	C	G	upstream_gene_variant	MODIFIER	T26C12.2
526	IV	3596150	A	T	upstream_gene_variant	MODIFIER	taf-2
526	IV	3986089	C	T	upstream_gene_variant	MODIFIER	clec-78
526	IV	4097508	A	G	upstream_gene_variant	MODIFIER	C35B1.2
526	IV	4720856	G	A	upstream_gene_variant	MODIFIER	K08F11.1
526	IV	6336027	T	A	5_prime_UTR_variant	MODIFIER	mif-4
526	IV	7675734	A	T	upstream_gene_variant	MODIFIER	C08G9.2
526	IV	10050241	T	A	downstream_gene_variant	MODIFIER	frk-1
526	IV	14184448	A	T	upstream_gene_variant	MODIFIER	21ur-947
526	V	1136820	G	A	synonymous_variant	LOW	W07B8.1
526	V	1857624	T	A	upstream_gene_variant	MODIFIER	T10B5.10
526	V	2586779	G	A	upstream_gene_variant	MODIFIER	C29G2.6
526	V	2586780	G	T	upstream_gene_variant	MODIFIER	C29G2.6
526	V	3077743	C	A	upstream_gene_variant	MODIFIER	21ur-14628
526	V	4195430	C	A	upstream_gene_variant	MODIFIER	Y45G5AM.9
526	V	4676849	T	G	upstream_gene_variant	MODIFIER	K03B4.9
526	V	4687224	T	G	splice_region_variant&intron_variant	LOW	taf-10
526	V	7358367	T	G	synonymous_variant	LOW	C03G6.6
526	V	8146109	C	G	upstream_gene_variant	MODIFIER	21ur-14985
526	V	9725960	G	T	upstream_gene_variant	MODIFIER	F40F9.5
526	V	10255876	G	A	upstream_gene_variant	MODIFIER	rop-1
526	V	11335833	A	T	upstream_gene_variant	MODIFIER	T02E9.6
526	V	18915058	A	T	downstream_gene_variant	MODIFIER	ptr-22
526	V	18915079	A	T	downstream_gene_variant	MODIFIER	ptr-22
526	X	15606343	G	T	missense_variant	MODERATE	rab-14
531	I	1912479	C	A	upstream_gene_variant	MODIFIER	trpp-10
531	I	4105239	C	T	missense_variant	MODERATE	acd-1
531	I	6669141	T	A	upstream_gene_variant	MODIFIER	C17F3.1
531	I	6771487	G	T	upstream_gene_variant	MODIFIER	F08B6.7
531	I	8816949	C	T	upstream_gene_variant	MODIFIER	rps-15
531	I	10984164	A	T	downstream_gene_variant	MODIFIER	Y52B11A.3
531	I	11219997	A	T	upstream_gene_variant	MODIFIER	ins-36
531	I	11641964	C	A	stop_gained	HIGH	kin-23
531	I	12909458	A	T	upstream_gene_variant	MODIFIER	fbxa-121
531	I	14299297	T	A	missense_variant	MODERATE	fbxb-8
531	II	2235302	C	T	upstream_gene_variant	MODIFIER	F54A3.6
531	II	3088868	C	T	downstream_gene_variant	MODIFIER	copb-1
531	II	4493137	A	G	upstream_gene_variant	MODIFIER	T05C1.3
531	II	7972566	G	A	upstream_gene_variant	MODIFIER	C04H4.3
531	II	8777377	G	C	downstream_gene_variant	MODIFIER	sgn-1
531	II	9475481	G	C	missense_variant	MODERATE	chil-26
531	II	10087598	G	A	upstream_gene_variant	MODIFIER	C18D1.11
531	II	13488345	C	A	upstream_gene_variant	MODIFIER	alh-7
531	II	14466341	C	T	upstream_gene_variant	MODIFIER	mir-234
531	III	868675	A	T	missense_variant	MODERATE	T24C4.2
531	III	3540486	T	A	upstream_gene_variant	MODIFIER	C54C6.6
531	III	4789080	T	A	upstream_gene_variant	MODIFIER	enu-3.2
531	III	5133559	T	A	missense_variant	MODERATE	tbx-2
531	III	5495457	A	T	upstream_gene_variant	MODIFIER	R02F2.8
531	III	6518340	T	C	upstream_gene_variant	MODIFIER	acr-5
531	III	6591373	C	T	downstream_gene_variant	MODIFIER	ddo-3
531	III	10189904	A	T	upstream_gene_variant	MODIFIER	unc-47
531	III	12392874	G	A	upstream_gene_variant	MODIFIER	Y49E10.10
531	IV	700260	G	T	synonymous_variant	LOW	cutl-26
531	IV	1138277	C	T	upstream_gene_variant	MODIFIER	C44B12.11
531	IV	2914870	C	T	upstream_gene_variant	MODIFIER	Y54G2A.21
531	IV	5809608	G	A	upstream_gene_variant	MODIFIER	lntl-1
531	IV	12598229	C	A	missense_variant	MODERATE	pgp-1
531	IV	12614319	T	A	upstream_gene_variant	MODIFIER	efa-6
531	IV	16793239	A	G	upstream_gene_variant	MODIFIER	21ur-11271
531	V	1960675	T	C	upstream_gene_variant	MODIFIER	srj-16
531	V	4061929	T	A	upstream_gene_variant	MODIFIER	C49G7.1
531	V	9143543	A	G	upstream_gene_variant	MODIFIER	pitr-3
531	V	17786594	A	G	upstream_gene_variant	MODIFIER	srab-12
531	V	19816479	G	T	downstream_gene_variant	MODIFIER	21ur-11580
531	V	20747924	G	T	upstream_gene_variant	MODIFIER	dnj-25
531	X	2191317	T	A	upstream_gene_variant	MODIFIER	gap-1
531	X	5885914	G	C	missense_variant	MODERATE	flp-7
531	X	7454895	A	T	upstream_gene_variant	MODIFIER	K08A8.22
532	I	2211802	G	A	upstream_gene_variant	MODIFIER	W03F11.5
532	I	4271816	A	G	missense_variant	MODERATE	acin-1
532	I	5571050	G	T	upstream_gene_variant	MODIFIER	pqn-52
532	I	9930073	G	A	missense_variant	MODERATE	strl-1
532	II	3742429	T	C	3_prime_UTR_variant	MODIFIER	F12E12.1
532	II	4678598	A	T	missense_variant	MODERATE	T05A7.1
532	II	6994096	A	T	upstream_gene_variant	MODIFIER	C15F1.15
532	II	6994097	T	G	upstream_gene_variant	MODIFIER	C15F1.15
532	II	10323553	A	T	upstream_gene_variant	MODIFIER	M02G9.6
532	II	10792458	C	A	missense_variant	MODERATE	vps-11
532	III	284240	G	A	missense_variant	MODERATE	taco-1
532	III	617852	C	G	upstream_gene_variant	MODIFIER	T19C3.3
532	III	1131523	C	T	intron_variant	MODIFIER	Y71D11A.3
532	III	1171920	A	G	synonymous_variant	LOW	cdh-12
532	III	1614763	T	A	upstream_gene_variant	MODIFIER	Y22D7AL.9
532	III	5444212	C	T	synonymous_variant	LOW	disl-2
532	III	6554914	T	A	upstream_gene_variant	MODIFIER	C09E7.7
532	III	7357620	G	A	upstream_gene_variant	MODIFIER	F08F8.9
532	III	7615836	A	T	upstream_gene_variant	MODIFIER	T04A6.1
532	III	9912546	T	A	upstream_gene_variant	MODIFIER	cyld-1
532	III	13093209	G	T	missense_variant	MODERATE	Y39E4B.13
532	IV	2058450	A	T	missense_variant	MODERATE	R05C11.2
532	IV	6242684	C	T	upstream_gene_variant	MODIFIER	21ur-6414
532	IV	9977823	A	G	upstream_gene_variant	MODIFIER	C47E12.14
532	IV	11702130	C	T	upstream_gene_variant	MODIFIER	dpy-20
532	V	3304705	G	T	synonymous_variant	LOW	F35F10.10
532	V	3304706	G	A	missense_variant	MODERATE	F35F10.10
532	V	4843701	T	C	synonymous_variant	LOW	cwp-3
532	V	4921453	G	A	missense_variant	MODERATE	srh-23
532	V	7270569	C	A	downstream_gene_variant	MODIFIER	C13A2.7
532	V	9650421	C	T	upstream_gene_variant	MODIFIER	atl-1
532	V	10573582	C	G	missense_variant	MODERATE	del-6
532	V	12107161	C	T	5_prime_UTR_variant	MODIFIER	nhr-136
532	V	14117029	A	T	upstream_gene_variant	MODIFIER	par-1
532	V	16875888	T	A	synonymous_variant	LOW	F49A5.10
532	V	20644168	C	A	missense_variant	MODERATE	srxa-15
532	X	1053179	A	G	upstream_gene_variant	MODIFIER	ncs-3
532	X	3125467	A	G	synonymous_variant	LOW	spc-1
532	X	3697852	A	T	upstream_gene_variant	MODIFIER	C02F12.8
532	X	5712077	A	G	upstream_gene_variant	MODIFIER	cat-1
532	X	15037699	A	T	upstream_gene_variant	MODIFIER	dsc-1
532	X	15636161	G	T	upstream_gene_variant	MODIFIER	K09E9.8
532	X	17001767	C	A	missense_variant	MODERATE	mbl-1
532	X	17625418	G	A	missense_variant	MODERATE	H18N23.2
536	I	1636918	A	C	downstream_gene_variant	MODIFIER	Y73E7A.1
536	I	2280649	A	G	missense_variant	MODERATE	Y39G10AL.1
536	I	3870895	C	A	upstream_gene_variant	MODIFIER	hcp-4
536	I	6000891	A	C	5_prime_UTR_variant	MODIFIER	unc-94
536	I	6000912	T	C	5_prime_UTR_variant	MODIFIER	unc-94
536	I	9140102	T	A	upstream_gene_variant	MODIFIER	ZK858.5
536	I	10847557	A	G	missense_variant	MODERATE	vet-2
536	I	13001347	A	T	upstream_gene_variant	MODIFIER	pmr-1
536	I	13331945	T	A	upstream_gene_variant	MODIFIER	T04D3.9
536	I	13725146	A	T	upstream_gene_variant	MODIFIER	hsd-1
536	II	2749375	T	G	upstream_gene_variant	MODIFIER	F29A7.5
536	II	8271955	A	C	splice_region_variant&intron_variant	LOW	tdc-1
536	II	8351055	A	G	missense_variant	MODERATE	C26D10.6
536	II	11249538	C	A	upstream_gene_variant	MODIFIER	T06D8.10
536	II	11810280	A	G	3_prime_UTR_variant	MODIFIER	F43G6.10
536	II	11908339	A	G	missense_variant	MODERATE	ZK930.4
536	II	11912197	G	A	upstream_gene_variant	MODIFIER	ZK930.7
536	II	13519771	C	A	upstream_gene_variant	MODIFIER	F54F11.6
536	III	773678	C	T	synonymous_variant	LOW	cyn-6
536	III	2295621	C	T	missense_variant	MODERATE	Y54F10BM.9
536	III	3717386	T	A	downstream_gene_variant	MODIFIER	alkb-8
536	III	4574829	A	T	upstream_gene_variant	MODIFIER	wdr-48
536	III	5730379	G	T	splice_region_variant&synonymous_variant	LOW	B0244.9
536	III	6974024	C	T	upstream_gene_variant	MODIFIER	eef-1A.1
536	III	7050765	T	A	intergenic_region	MODIFIER	R01H2.7-R01H2.2
536	III	10922254	C	T	upstream_gene_variant	MODIFIER	M142.3
536	IV	2875775	A	T	intron_variant	MODIFIER	Y54G2A.17
536	IV	2875783	G	A	intron_variant	MODIFIER	Y54G2A.17
536	IV	4383403	G	C	missense_variant	MODERATE	F55F10.1
536	IV	5955168	A	T	upstream_gene_variant	MODIFIER	21ur-11026
536	IV	7173141	A	T	upstream_gene_variant	MODIFIER	str-220
536	IV	7603840	C	A	synonymous_variant	LOW	tag-80
536	IV	9589341	C	G	upstream_gene_variant	MODIFIER	F27C8.11
536	IV	15356304	T	C	upstream_gene_variant	MODIFIER	21ur-8897
536	IV	17120656	C	A	upstream_gene_variant	MODIFIER	cyn-13
536	V	3791511	C	T	upstream_gene_variant	MODIFIER	fpn-1.3
536	V	6826220	G	A	upstream_gene_variant	MODIFIER	col-141
536	V	7314890	G	A	missense_variant	MODERATE	lmd-4
536	V	11190893	C	T	upstream_gene_variant	MODIFIER	VK10D6R.2
536	V	11397267	G	A	missense_variant	MODERATE	nas-18
536	V	12287035	C	T	missense_variant&splice_region_variant	MODERATE	rskd-1
536	V	16142796	T	A	missense_variant	MODERATE	fbxa-88
536	V	16301682	G	A	upstream_gene_variant	MODIFIER	C31A11.12
536	V	18642785	C	G	missense_variant	MODERATE	egas-1
536	V	19557910	T	G	upstream_gene_variant	MODIFIER	oac-1
536	V	20300586	A	G	upstream_gene_variant	MODIFIER	ZC15.4
536	X	7790175	A	G	upstream_gene_variant	MODIFIER	ZK154.5
536	X	7997099	A	G	upstream_gene_variant	MODIFIER	F45E1.13
536	X	8397937	C	T	upstream_gene_variant	MODIFIER	F41D9.7
536	X	8957842	T	G	synonymous_variant	LOW	aexr-3
536	X	9033433	A	C	upstream_gene_variant	MODIFIER	nep-22
536	X	11266849	A	G	upstream_gene_variant	MODIFIER	ifa-1
536	X	14005609	A	G	missense_variant	MODERATE	tbc-19
536	X	14613920	T	G	splice_region_variant&intron_variant	LOW	rbc-1
536	X	17095543	G	T	missense_variant	MODERATE	C08A9.6
536	X	17700267	G	T	upstream_gene_variant	MODIFIER	anr-17
540	I	1727109	T	A	missense_variant	MODERATE	tln-1
540	I	2713227	T	A	downstream_gene_variant	MODIFIER	dnj-30
540	I	8368671	G	C	missense_variant	MODERATE	tbcd-1
540	I	8368673	T	A	missense_variant	MODERATE	tbcd-1
540	I	11319205	T	A	upstream_gene_variant	MODIFIER	cdk-9
540	I	13153104	C	A	missense_variant	MODERATE	F22G12.3
540	I	13797910	A	C	upstream_gene_variant	MODIFIER	ndx-4
540	II	568695	A	T	upstream_gene_variant	MODIFIER	W08F4.16
540	II	3035163	T	A	synonymous_variant	LOW	B0454.6
540	II	7809076	C	T	upstream_gene_variant	MODIFIER	T05A6.10
540	II	7968495	T	A	downstream_gene_variant	MODIFIER	C04H4.5
540	II	8301612	C	T	downstream_gene_variant	MODIFIER	shw-1
540	II	8381056	G	T	upstream_gene_variant	MODIFIER	F49E12.12
540	II	8996069	C	T	synonymous_variant	LOW	F44G4.1
540	II	12491293	G	A	synonymous_variant	LOW	T21B4.15
540	II	14257343	T	C	upstream_gene_variant	MODIFIER	Y54G11A.19
540	III	4849848	C	A	start_lost	HIGH	F26A1.14
540	III	5079354	C	T	synonymous_variant	LOW	alh-1
540	III	5553084	T	G	upstream_gene_variant	MODIFIER	F09F7.6
540	III	6037585	G	A	upstream_gene_variant	MODIFIER	F40H6.2
540	III	8380214	C	T	upstream_gene_variant	MODIFIER	R05D3.12
540	III	10928824	A	T	upstream_gene_variant	MODIFIER	M142.5
540	III	11846986	C	A	upstream_gene_variant	MODIFIER	ntl-3
540	III	12203761	T	A	upstream_gene_variant	MODIFIER	osm-12
540	IV	794555	C	T	upstream_gene_variant	MODIFIER	F56B3.4
540	IV	1382261	A	G	upstream_gene_variant	MODIFIER	mir-4937
540	IV	5515573	T	C	upstream_gene_variant	MODIFIER	21ur-1966
540	IV	6873773	C	G	upstream_gene_variant	MODIFIER	21ur-9864
540	IV	9160431	T	A	upstream_gene_variant	MODIFIER	pcp-3
540	IV	11149693	C	T	upstream_gene_variant	MODIFIER	F01G4.5
540	IV	16308799	G	A	missense_variant	MODERATE	rac-2
540	V	1694489	G	T	upstream_gene_variant	MODIFIER	Y46H3C.9
540	V	5645852	G	T	missense_variant	MODERATE	srx-117
540	V	5673082	A	G	upstream_gene_variant	MODIFIER	C14C11.11
540	V	6226306	T	C	upstream_gene_variant	MODIFIER	W06H8.5
540	V	8915259	A	G	upstream_gene_variant	MODIFIER	mod-1
540	V	12469221	T	G	synonymous_variant	LOW	F28C1.3
540	V	13813638	T	A	upstream_gene_variant	MODIFIER	F55B12.15
540	V	18114692	C	T	3_prime_UTR_variant	MODIFIER	Y37H2A.1
540	V	19923922	T	C	upstream_gene_variant	MODIFIER	Y60A3A.16
540	X	2228232	C	G	upstream_gene_variant	MODIFIER	T14F9.13
540	X	3087138	C	A	missense_variant	MODERATE	F52E4.5
540	X	4997437	G	T	upstream_gene_variant	MODIFIER	set-30
540	X	6309629	A	T	upstream_gene_variant	MODIFIER	T10E10.12
540	X	6673599	A	C	upstream_gene_variant	MODIFIER	nhr-137
540	X	8727881	A	T	upstream_gene_variant	MODIFIER	tnt-2
540	X	11529576	C	T	upstream_gene_variant	MODIFIER	anr-16
540	X	14692710	C	T	missense_variant	MODERATE	sox-3
540	X	16475313	A	T	downstream_gene_variant	MODIFIER	nas-39
541	I	3213910	A	G	missense_variant	MODERATE	fog-1
541	I	3810679	C	T	missense_variant	MODERATE	ubr-1
541	I	5243963	T	G	upstream_gene_variant	MODIFIER	C32E12.4
541	I	6344113	A	G	synonymous_variant	LOW	bli-4
541	I	6839749	C	T	upstream_gene_variant	MODIFIER	dpy-14
541	I	11399218	T	C	upstream_gene_variant	MODIFIER	aat-9
541	II	3911362	A	G	upstream_gene_variant	MODIFIER	F53C3.11
541	II	4817442	A	C	upstream_gene_variant	MODIFIER	linc-139
541	II	8313493	C	T	upstream_gene_variant	MODIFIER	F14F11.3
541	II	14221707	C	T	upstream_gene_variant	MODIFIER	Y48B6A.17
541	II	15215515	G	A	upstream_gene_variant	MODIFIER	Y46E12BM.1
541	III	3026661	C	A	intron_variant	MODIFIER	daf-2
541	III	3196292	G	C	missense_variant	MODERATE	R148.7
541	III	3415691	G	A	upstream_gene_variant	MODIFIER	F59A2.7
541	III	4871218	G	T	missense_variant	MODERATE	gipc-1
541	III	10257004	C	T	missense_variant	MODERATE	R01H10.4
541	III	11491485	A	G	upstream_gene_variant	MODIFIER	Y66A7A.2
541	III	11852784	G	C	downstream_gene_variant	MODIFIER	mif-1
541	IV	2003876	A	T	downstream_gene_variant	MODIFIER	cpsf-1
541	IV	16835015	C	A	upstream_gene_variant	MODIFIER	21ur-397
541	V	5597343	C	A	upstream_gene_variant	MODIFIER	zhit-1
541	V	6316490	C	T	upstream_gene_variant	MODIFIER	K12B6.8
541	V	6510265	C	T	synonymous_variant	LOW	ubh-1
541	V	6763164	A	T	upstream_gene_variant	MODIFIER	T25F10.4
541	V	7329285	A	C	missense_variant	MODERATE	clec-7
541	V	10430915	T	A	upstream_gene_variant	MODIFIER	apc-10
541	V	10430946	C	T	upstream_gene_variant	MODIFIER	apc-10
541	V	11522204	A	C	missense_variant	MODERATE	pafo-1
541	V	14683753	C	A	upstream_gene_variant	MODIFIER	daf-21
541	V	15134895	C	T	missense_variant	MODERATE	aipl-1
541	V	15370544	A	T	upstream_gene_variant	MODIFIER	srh-107
541	V	15643823	T	A	upstream_gene_variant	MODIFIER	srz-44
541	V	16730014	T	A	upstream_gene_variant	MODIFIER	21ur-15294
541	X	1785786	C	G	upstream_gene_variant	MODIFIER	arg-1
541	X	2243843	G	A	splice_donor_variant&intron_variant	HIGH	AH9.7
541	X	2419188	G	A	upstream_gene_variant	MODIFIER	glr-7
541	X	2553485	A	T	upstream_gene_variant	MODIFIER	F52H2.t2
541	X	2553534	G	C	upstream_gene_variant	MODIFIER	F52H2.t2
541	X	5967371	G	T	missense_variant	MODERATE	R07E4.1
541	X	6961448	T	G	upstream_gene_variant	MODIFIER	C16E9.29
541	X	8398420	C	A	upstream_gene_variant	MODIFIER	F41D9.7
541	X	14289609	G	A	synonymous_variant	LOW	madd-3
541	X	14289626	A	G	missense_variant	MODERATE	madd-3
542	I	720017	G	T	5_prime_UTR_variant	MODIFIER	pif-1
542	I	10433218	A	G	synonymous_variant	LOW	pab-1
542	II	1130141	G	A	missense_variant	MODERATE	taf-6.1
542	II	1322054	C	T	synonymous_variant	LOW	vig-1
542	II	3358931	T	A	3_prime_UTR_variant	MODIFIER	bath-29
542	II	3358933	T	C	3_prime_UTR_variant	MODIFIER	bath-29
542	II	3358934	T	C	3_prime_UTR_variant	MODIFIER	bath-29
542	II	3358944	A	G	3_prime_UTR_variant	MODIFIER	bath-29
542	II	3358950	A	G	3_prime_UTR_variant	MODIFIER	bath-29
542	II	3358994	A	G	upstream_gene_variant	MODIFIER	F14D2.2
542	II	3358998	A	G	upstream_gene_variant	MODIFIER	F14D2.2
542	II	3358999	T	C	upstream_gene_variant	MODIFIER	F14D2.2
542	II	6339902	A	T	upstream_gene_variant	MODIFIER	C32D5.7
542	II	12363862	G	C	upstream_gene_variant	MODIFIER	Y57A10B.8
542	II	13792202	A	T	upstream_gene_variant	MODIFIER	C01B9.6
542	II	14129821	G	A	upstream_gene_variant	MODIFIER	K09E4.3
542	III	640869	G	A	upstream_gene_variant	MODIFIER	T19C3.7
542	III	1490984	T	G	downstream_gene_variant	MODIFIER	ave-1
542	III	6066945	C	T	upstream_gene_variant	MODIFIER	C05D10.2
542	III	6458559	G	T	upstream_gene_variant	MODIFIER	T26A5.4
542	III	7644050	G	C	upstream_gene_variant	MODIFIER	upp-1
542	III	7819579	C	T	upstream_gene_variant	MODIFIER	C08C3.10
542	III	9008795	G	A	upstream_gene_variant	MODIFIER	rab-6.1
542	III	10479993	C	A	missense_variant	MODERATE	D2045.7
542	III	10581709	A	G	upstream_gene_variant	MODIFIER	Y45F3A.6
542	III	10889775	T	A	upstream_gene_variant	MODIFIER	fbxb-87
542	III	11041354	A	T	upstream_gene_variant	MODIFIER	Y48A6B.10
542	IV	1473993	G	A	downstream_gene_variant	MODIFIER	Y77E11A.t3
542	IV	5147141	C	T	upstream_gene_variant	MODIFIER	21ur-7649
542	IV	7171928	A	T	upstream_gene_variant	MODIFIER	str-220
542	IV	7235064	G	A	upstream_gene_variant	MODIFIER	cap-1
542	IV	8875793	G	C	missense_variant	MODERATE	hdl-2
542	IV	10991074	C	T	synonymous_variant	LOW	F13H10.5
542	IV	11861845	T	A	upstream_gene_variant	MODIFIER	F38H4.15
542	V	170481	A	G	upstream_gene_variant	MODIFIER	Y108G3AL.10
542	V	3146899	T	G	upstream_gene_variant	MODIFIER	srab-10
542	V	6647457	T	A	upstream_gene_variant	MODIFIER	T10H9.1
542	V	10361011	G	T	missense_variant	MODERATE	ttll-15
542	V	13211969	G	A	upstream_gene_variant	MODIFIER	F57B1.12
542	V	18099489	T	G	upstream_gene_variant	MODIFIER	par-4
542	X	3573911	A	C	upstream_gene_variant	MODIFIER	vit-3
542	X	7207370	G	A	upstream_gene_variant	MODIFIER	C55B6.5
542	X	8202676	A	C	upstream_gene_variant	MODIFIER	C17H11.8
542	X	9235055	C	G	upstream_gene_variant	MODIFIER	vav-1
542	X	10096007	A	C	missense_variant	MODERATE	W07E11.1
542	X	11884992	T	A	upstream_gene_variant	MODIFIER	Y62H9A.5
542	X	14190487	T	A	upstream_gene_variant	MODIFIER	ceh-36
542	X	15325160	T	C	upstream_gene_variant	MODIFIER	Y15E3A.16
543	I	4294866	T	C	upstream_gene_variant	MODIFIER	linc-85
543	I	15015317	G	T	missense_variant	MODERATE	F33H2.6
543	II	265709	G	A	splice_acceptor_variant&intron_variant	HIGH	B0432.14
543	II	2063077	A	G	upstream_gene_variant	MODIFIER	F07E5.5
543	II	3651360	C	G	missense_variant	MODERATE	F19B10.11
543	II	6109187	A	T	missense_variant	MODERATE	rgs-3
543	II	6580408	C	A	missense_variant	MODERATE	C56C10.6
543	II	12090555	G	T	upstream_gene_variant	MODIFIER	cnt-1
543	II	13409699	T	A	upstream_gene_variant	MODIFIER	Y48C3A.18
543	III	47864	G	A	downstream_gene_variant	MODIFIER	W05G11.7
543	III	781881	G	T	upstream_gene_variant	MODIFIER	alh-11
543	III	1508152	A	T	upstream_gene_variant	MODIFIER	M01G5.10
543	III	2127890	A	T	intergenic_region	MODIFIER	Y48G9A.6-frl-1
543	III	3607212	C	A	missense_variant	MODERATE	ptp-1
543	III	4774854	C	T	upstream_gene_variant	MODIFIER	B0393.14
543	III	7321913	G	T	upstream_gene_variant	MODIFIER	F56C9.8
543	III	8111166	T	A	splice_region_variant	LOW	gei-8
543	III	9313432	T	G	upstream_gene_variant	MODIFIER	C40H1.8
543	III	13346608	C	T	splice_region_variant&synonymous_variant	LOW	F53A2.7
543	IV	168259	G	T	synonymous_variant	LOW	cutl-24
543	IV	2935221	T	A	downstream_gene_variant	MODIFIER	Y54G2A.24
543	IV	4044694	C	G	downstream_gene_variant	MODIFIER	F35F11.2
543	IV	12028946	T	G	synonymous_variant	LOW	T12G3.7
543	IV	12301027	C	T	upstream_gene_variant	MODIFIER	K09E10.5
543	IV	16434467	T	C	upstream_gene_variant	MODIFIER	21ur-11092
543	IV	16730136	T	G	upstream_gene_variant	MODIFIER	21ur-11161
543	IV	17072018	G	A	upstream_gene_variant	MODIFIER	21ur-2055
543	V	3180024	A	T	upstream_gene_variant	MODIFIER	linc-160
543	V	5513960	T	A	upstream_gene_variant	MODIFIER	hpo-15
543	V	7877352	T	A	upstream_gene_variant	MODIFIER	F40A3.3
543	V	8980654	C	T	synonymous_variant	LOW	str-84
543	V	10982625	A	G	upstream_gene_variant	MODIFIER	fig-1
543	V	11898154	G	A	upstream_gene_variant	MODIFIER	K12G11.11
543	V	12136380	A	T	missense_variant	MODERATE	C27A7.1
543	V	15016705	A	T	upstream_gene_variant	MODIFIER	obr-2
543	V	15229380	G	A	upstream_gene_variant	MODIFIER	C41G6.17
543	V	16970419	T	C	upstream_gene_variant	MODIFIER	efl-1
543	V	18281576	C	A	upstream_gene_variant	MODIFIER	Y37H2C.1
543	V	19994960	A	C	upstream_gene_variant	MODIFIER	Y60A3A.25
543	X	545245	A	T	downstream_gene_variant	MODIFIER	F28C10.1
543	X	598239	G	A	upstream_gene_variant	MODIFIER	F13C5.10
543	X	3980152	A	T	upstream_gene_variant	MODIFIER	C16B8.13
543	X	4291926	A	T	upstream_gene_variant	MODIFIER	C52B9.17
543	X	7161814	A	G	synonymous_variant	LOW	pgp-10
543	X	8516739	A	T	upstream_gene_variant	MODIFIER	H03E18.4
543	X	9015553	C	G	upstream_gene_variant	MODIFIER	T25B6.9
543	X	9664314	G	T	upstream_gene_variant	MODIFIER	T14B1.4
543	X	13194999	G	T	upstream_gene_variant	MODIFIER	F48C11.8
543	X	14366776	T	A	upstream_gene_variant	MODIFIER	21ur-15702
543	X	14415670	T	G	5_prime_UTR_variant	MODIFIER	F23D12.10
543	X	17582585	A	G	upstream_gene_variant	MODIFIER	F39B3.3
544	I	94023	A	T	splice_region_variant&intron_variant	LOW	Y48G1C.1
544	I	1867034	T	G	intron_variant	MODIFIER	scm-1
544	I	1867045	C	G	intron_variant	MODIFIER	scm-1
544	I	1867049	A	T	intron_variant	MODIFIER	scm-1
544	I	1867051	G	A	intron_variant	MODIFIER	scm-1
544	I	3227819	T	G	missense_variant	MODERATE	cdt-1
544	I	6164227	T	A	stop_lost	HIGH	T09B4.t1
544	I	11693331	G	C	upstream_gene_variant	MODIFIER	scrm-1
544	I	11719319	C	T	missense_variant	MODERATE	F35E2.8
544	I	12610968	G	A	upstream_gene_variant	MODIFIER	T07D10.1
544	I	12610969	A	T	upstream_gene_variant	MODIFIER	T07D10.1
544	I	13586666	A	G	downstream_gene_variant	MODIFIER	ubc-14
544	I	13755119	A	G	splice_donor_variant&intron_variant	HIGH	Y6B3B.5
544	I	14097327	T	G	upstream_gene_variant	MODIFIER	fbxb-100
544	II	35688	C	T	missense_variant	MODERATE	F23F1.6
544	II	471859	T	C	missense_variant	MODERATE	nol-1
544	II	1661064	G	T	upstream_gene_variant	MODIFIER	ZC204.12
544	II	3123191	G	T	upstream_gene_variant	MODIFIER	srh-71
544	II	8066674	A	C	missense_variant	MODERATE	pdha-1
544	II	9734885	C	T	upstream_gene_variant	MODIFIER	Y53C12B.9
544	III	5543847	A	T	upstream_gene_variant	MODIFIER	D1044.6
544	III	5585621	T	A	upstream_gene_variant	MODIFIER	F56D2.5
544	III	6344638	G	A	upstream_gene_variant	MODIFIER	let-767
544	III	9064856	A	G	missense_variant	MODERATE	lin-12
544	III	9140254	G	A	upstream_gene_variant	MODIFIER	ZK512.7
544	III	10528952	C	T	missense_variant	MODERATE	unc-49
544	III	12995256	G	A	upstream_gene_variant	MODIFIER	col-97
544	IV	1159661	A	T	3_prime_UTR_variant	MODIFIER	ets-8
544	IV	4479395	C	A	upstream_gene_variant	MODIFIER	M01H9.3
544	IV	6472121	T	G	upstream_gene_variant	MODIFIER	21ur-9504
544	IV	11500385	C	T	upstream_gene_variant	MODIFIER	sms-1
544	IV	13034244	T	A	downstream_gene_variant	MODIFIER	F49E11.2
544	IV	13871192	A	C	missense_variant	MODERATE	B0513.5
544	IV	14448055	C	G	upstream_gene_variant	MODIFIER	tra-3
544	IV	14831634	G	T	upstream_gene_variant	MODIFIER	hhat-2
544	V	1591040	A	T	upstream_gene_variant	MODIFIER	F16B4.4
544	V	3173173	G	A	upstream_gene_variant	MODIFIER	C36C5.15
544	V	5355420	A	T	upstream_gene_variant	MODIFIER	T09D3.10
544	V	5752379	A	G	upstream_gene_variant	MODIFIER	C53A3.3
544	V	10062532	A	G	upstream_gene_variant	MODIFIER	fipr-13
544	V	11798107	A	T	upstream_gene_variant	MODIFIER	D2023.12
544	V	12315833	A	C	upstream_gene_variant	MODIFIER	R04F11.22
544	V	12580519	A	T	upstream_gene_variant	MODIFIER	grl-23
544	V	13629406	C	A	missense_variant	MODERATE	F53F4.14
544	V	13629407	G	T	missense_variant	MODERATE	F53F4.14
544	V	13629409	T	A	synonymous_variant	LOW	F53F4.14
544	V	13629414	C	A	missense_variant	MODERATE	F53F4.14
544	V	13629415	T	A	synonymous_variant	LOW	F53F4.14
544	V	14862905	T	A	upstream_gene_variant	MODIFIER	npr-13
544	V	17057558	G	A	missense_variant	MODERATE	F28B1.5
544	V	19645601	T	A	3_prime_UTR_variant	MODIFIER	mrps-28
544	V	20109794	A	T	downstream_gene_variant	MODIFIER	sec-23
544	X	1859011	G	T	upstream_gene_variant	MODIFIER	ceh-39
544	X	4128503	A	G	upstream_gene_variant	MODIFIER	F09F9.4
544	X	4909234	C	T	upstream_gene_variant	MODIFIER	K05B2.9
544	X	5398664	G	T	splice_region_variant&intron_variant	LOW	scav-1
544	X	7066228	T	A	upstream_gene_variant	MODIFIER	B0403.3
544	X	8465070	A	T	upstream_gene_variant	MODIFIER	F16F9.4
544	X	8990028	G	A	upstream_gene_variant	MODIFIER	C24A3.4
544	X	9430456	A	T	upstream_gene_variant	MODIFIER	B0272.3
544	X	9668022	G	A	upstream_gene_variant	MODIFIER	21ur-14231
544	X	10728317	A	G	upstream_gene_variant	MODIFIER	T01C1.12
544	X	11468156	A	T	upstream_gene_variant	MODIFIER	T25C12.8
544	X	12202648	A	G	upstream_gene_variant	MODIFIER	C23H4.10
544	X	13138941	G	T	missense_variant	MODERATE	F09A5.2
544	X	13138942	T	G	synonymous_variant	LOW	F09A5.2
544	X	16721114	C	A	downstream_gene_variant	MODIFIER	lgc-53
544	X	17342851	G	C	downstream_gene_variant	MODIFIER	C53C11.2
545	I	276984	A	T	upstream_gene_variant	MODIFIER	21ur-15400
545	I	417958	A	T	upstream_gene_variant	MODIFIER	C07F11.2
545	I	5407738	T	A	upstream_gene_variant	MODIFIER	C24A11.11
545	I	7674721	A	T	upstream_gene_variant	MODIFIER	del-3
545	I	8270194	T	C	upstream_gene_variant	MODIFIER	cutl-8
545	I	9441398	T	C	3_prime_UTR_variant	MODIFIER	mec-8
545	I	10439401	A	T	missense_variant	MODERATE	Y106G6H.5
545	I	12984888	C	T	upstream_gene_variant	MODIFIER	nlp-15
545	I	13487638	T	A	upstream_gene_variant	MODIFIER	Y48G10A.2
545	II	404217	A	T	3_prime_UTR_variant	MODIFIER	clec-10
545	II	1440482	G	T	upstream_gene_variant	MODIFIER	nol-6
545	II	2719869	G	A	upstream_gene_variant	MODIFIER	T05A8.3
545	II	2802171	T	A	upstream_gene_variant	MODIFIER	nhr-119
545	II	4127508	C	G	upstream_gene_variant	MODIFIER	21ur-13771
545	II	6970662	A	G	upstream_gene_variant	MODIFIER	tra-2
545	II	7468780	T	A	downstream_gene_variant	MODIFIER	D1022.13
545	II	8666198	A	T	upstream_gene_variant	MODIFIER	piga-1
545	II	8866328	G	A	upstream_gene_variant	MODIFIER	npr-20
545	II	8951486	G	T	upstream_gene_variant	MODIFIER	cutl-15
545	II	10106177	G	A	synonymous_variant	LOW	ZK945.6
545	II	11391294	G	A	upstream_gene_variant	MODIFIER	shn-1
545	III	2336000	T	A	upstream_gene_variant	MODIFIER	Y54F10BM.13
545	III	2375576	C	T	upstream_gene_variant	MODIFIER	H04J21.1
545	III	5824871	C	A	upstream_gene_variant	MODIFIER	R12B2.11
545	III	9655457	A	G	missense_variant	MODERATE	C15H7.4
545	III	11479816	A	G	upstream_gene_variant	MODIFIER	Y66A7AL.4
545	IV	1464834	T	A	upstream_gene_variant	MODIFIER	col-106
545	IV	2456477	C	T	upstream_gene_variant	MODIFIER	C45G7.11
545	IV	4499932	T	C	upstream_gene_variant	MODIFIER	ZK180.17
545	IV	6979481	A	T	upstream_gene_variant	MODIFIER	pgl-1
545	IV	12261781	C	T	upstream_gene_variant	MODIFIER	Y39C12A.9
545	IV	14451824	A	T	upstream_gene_variant	MODIFIER	21ur-7684
545	V	8555	T	C	upstream_gene_variant	MODIFIER	ife-3
545	V	98881	A	T	upstream_gene_variant	MODIFIER	21ur-15058
545	V	172969	G	A	upstream_gene_variant	MODIFIER	Y108G3AL.3
545	V	1185089	T	G	missense_variant	MODERATE	Y50D4A.4
545	V	2963024	C	T	missense_variant	MODERATE	srw-138
545	V	4441654	G	C	missense_variant	MODERATE	rft-1
545	V	5252653	A	T	upstream_gene_variant	MODIFIER	B0238.13
545	V	6218418	A	G	synonymous_variant	LOW	str-206
545	V	8355486	T	G	upstream_gene_variant	MODIFIER	mom-2
545	V	12124235	T	A	upstream_gene_variant	MODIFIER	C13C4.7
545	V	13336953	C	G	upstream_gene_variant	MODIFIER	nhr-168
545	V	15541287	G	A	downstream_gene_variant	MODIFIER	F21A3.4
545	V	16796682	G	A	missense_variant	MODERATE	ctps-1
545	V	17705867	T	G	upstream_gene_variant	MODIFIER	W06D12.6
545	V	17936993	G	A	missense_variant	MODERATE	dpy-21
545	V	18767177	A	T	upstream_gene_variant	MODIFIER	F11D11.20
545	X	1486687	G	A	upstream_gene_variant	MODIFIER	D1005.4
545	X	1495296	G	A	synonymous_variant	LOW	F09E10.6
545	X	3121424	G	A	synonymous_variant	LOW	spc-1
545	X	6534815	C	A	upstream_gene_variant	MODIFIER	ceh-60
545	X	8707638	A	T	upstream_gene_variant	MODIFIER	F53A9.3
545	X	10079265	A	T	upstream_gene_variant	MODIFIER	ZC373.5
545	X	10902732	A	G	upstream_gene_variant	MODIFIER	suca-1
545	X	11336360	A	G	synonymous_variant	LOW	gcy-9
545	X	11618381	C	A	missense_variant	MODERATE	F52D10.4
545	X	11936545	C	T	upstream_gene_variant	MODIFIER	dot-1.4
545	X	12833647	T	A	upstream_gene_variant	MODIFIER	C52G5.7
545	X	15144713	A	T	upstream_gene_variant	MODIFIER	C11G10.2
545	X	15379244	C	T	upstream_gene_variant	MODIFIER	tag-97
545	X	15847251	A	T	upstream_gene_variant	MODIFIER	acl-1
546	I	639929	C	T	upstream_gene_variant	MODIFIER	Y65B4A.6
546	I	2280180	G	T	upstream_gene_variant	MODIFIER	Y39G10AL.1
546	I	4265923	A	T	upstream_gene_variant	MODIFIER	acin-1
546	I	4526344	A	C	downstream_gene_variant	MODIFIER	Y119C1B.12
546	I	6039844	G	A	missense_variant	MODERATE	tag-146
546	I	6897516	T	A	downstream_gene_variant	MODIFIER	C48B6.13
546	I	7028817	C	T	3_prime_UTR_variant	MODIFIER	ubql-1
546	I	7303067	A	C	5_prime_UTR_variant	MODIFIER	ttx-7
546	I	8415375	A	T	upstream_gene_variant	MODIFIER	lin-28
546	I	9339074	G	A	intron_variant	MODIFIER	lin-41
546	I	11129266	G	T	downstream_gene_variant	MODIFIER	ZK39.12
546	II	68934	G	A	upstream_gene_variant	MODIFIER	egl-26
546	II	1320352	C	T	3_prime_UTR_variant	MODIFIER	fcho-1
546	II	2353111	T	C	upstream_gene_variant	MODIFIER	F43C11.10
546	II	3758669	A	T	splice_acceptor_variant&intron_variant	HIGH	srx-111
546	II	4418219	A	T	upstream_gene_variant	MODIFIER	tag-231
546	II	6542104	A	C	upstream_gene_variant	MODIFIER	tag-184
546	II	7997927	C	T	missense_variant	MODERATE	pgp-11
546	II	8005174	T	A	upstream_gene_variant	MODIFIER	pgp-11
546	III	523302	A	G	splice_region_variant&intron_variant	LOW	T22F7.3
546	III	1096531	T	C	upstream_gene_variant	MODIFIER	F58B6.6
546	III	2917002	A	G	downstream_gene_variant	MODIFIER	R10F2.4
546	III	4827330	A	T	downstream_gene_variant	MODIFIER	21ur-14291
546	III	5226801	A	T	3_prime_UTR_variant	MODIFIER	nex-1
546	III	5234825	A	G	upstream_gene_variant	MODIFIER	prx-10
546	III	5234832	C	T	upstream_gene_variant	MODIFIER	prx-10
546	III	10903224	A	T	upstream_gene_variant	MODIFIER	unc-119
546	III	11636535	A	T	upstream_gene_variant	MODIFIER	Y41C4A.17
546	III	12499630	C	T	missense_variant	MODERATE	sql-1
546	III	13649251	T	A	intron_variant	MODIFIER	set-16
546	IV	3179226	G	A	upstream_gene_variant	MODIFIER	Y67D8B.4
546	IV	5505774	A	T	upstream_gene_variant	MODIFIER	21ur-12646
546	IV	5613644	C	A	missense_variant	MODERATE	C39H7.4
546	IV	6869105	G	C	missense_variant	MODERATE	srx-20
546	IV	7945251	C	A	missense_variant	MODERATE	czw-1
546	IV	10050242	A	T	downstream_gene_variant	MODIFIER	frk-1
546	IV	13098758	A	T	5_prime_UTR_variant	MODIFIER	dli-1
546	IV	13521777	T	A	upstream_gene_variant	MODIFIER	dcap-2
546	IV	14859775	A	G	upstream_gene_variant	MODIFIER	21ur-1734
546	IV	15136922	T	G	upstream_gene_variant	MODIFIER	21ur-4935
546	IV	15206620	A	G	upstream_gene_variant	MODIFIER	sra-30
546	IV	15253787	A	T	upstream_gene_variant	MODIFIER	21ur-11596
546	V	4426106	C	T	upstream_gene_variant	MODIFIER	skr-14
546	V	5554120	C	T	synonymous_variant	LOW	C18C4.5
546	V	5764431	T	A	upstream_gene_variant	MODIFIER	C53A3.1
546	V	5848614	A	C	upstream_gene_variant	MODIFIER	F26F12.3
546	V	6191227	C	G	upstream_gene_variant	MODIFIER	H05O09.3
546	V	6794872	G	A	synonymous_variant	LOW	ZC404.1
546	V	10037109	G	A	upstream_gene_variant	MODIFIER	T06E8.7
546	V	10936399	A	T	upstream_gene_variant	MODIFIER	F17C11.16
546	V	13822237	A	T	synonymous_variant	LOW	sel-10
546	V	15589491	C	G	downstream_gene_variant	MODIFIER	fbxa-139
546	V	16192272	A	T	upstream_gene_variant	MODIFIER	srh-279
546	V	16764221	C	T	upstream_gene_variant	MODIFIER	F14D1.1
546	V	18560082	A	T	upstream_gene_variant	MODIFIER	ttr-24
546	V	19758280	C	T	missense_variant	MODERATE	W04E12.9
546	V	20355269	G	T	upstream_gene_variant	MODIFIER	K02E2.t1
546	X	461617	C	G	upstream_gene_variant	MODIFIER	abu-12
546	X	1197061	C	T	upstream_gene_variant	MODIFIER	T13G4.4
546	X	1479706	C	T	intron_variant	MODIFIER	D1005.1
546	X	2633382	A	C	upstream_gene_variant	MODIFIER	F54G2.1
546	X	10848018	T	A	upstream_gene_variant	MODIFIER	C05A9.2
546	X	10848020	G	A	upstream_gene_variant	MODIFIER	C05A9.2
546	X	11641720	G	C	upstream_gene_variant	MODIFIER	Y71H9A.8
546	X	12210879	G	A	upstream_gene_variant	MODIFIER	C23H4.9
546	X	12483006	A	T	splice_region_variant&intron_variant	LOW	atf-6
546	X	13839124	C	G	upstream_gene_variant	MODIFIER	M03B6.1
546	X	15067429	C	A	downstream_gene_variant	MODIFIER	H03G16.3
551	I	1202715	A	T	upstream_gene_variant	MODIFIER	Y48G8AL.5
551	II	1127757	T	A	3_prime_UTR_variant	MODIFIER	eri-3
551	II	5965080	A	G	upstream_gene_variant	MODIFIER	B0034.10
551	II	11276274	C	G	upstream_gene_variant	MODIFIER	C47G2.16
551	II	11276279	T	G	upstream_gene_variant	MODIFIER	C47G2.16
551	II	11609455	G	T	missense_variant	MODERATE	F07A11.4
551	III	2782780	T	A	3_prime_UTR_variant	MODIFIER	Y71H2AM.6
551	III	2782907	G	A	synonymous_variant	LOW	Y71H2AM.20
551	III	9923418	G	C	missense_variant	MODERATE	cbp-2
551	III	9923432	C	T	missense_variant	MODERATE	cbp-2
551	III	10879991	C	G	missense_variant	MODERATE	C44B9.3
551	IV	580794	G	A	missense_variant	MODERATE	F56A11.6
551	IV	8002784	C	T	downstream_gene_variant	MODIFIER	Y42H9B.6
551	IV	11754727	C	T	upstream_gene_variant	MODIFIER	scl-18
551	IV	14089577	A	T	upstream_gene_variant	MODIFIER	21ur-8313
551	IV	14611354	C	G	missense_variant	MODERATE	F13G11.t1
551	IV	15967343	C	T	upstream_gene_variant	MODIFIER	lgc-19
551	V	725451	C	T	synonymous_variant	LOW	icl-1
551	V	2062871	T	A	downstream_gene_variant	MODIFIER	comt-3
551	V	2670177	C	T	synonymous_variant	LOW	W02G9.4
551	V	4711786	A	C	downstream_gene_variant	MODIFIER	prx-6
551	V	5109564	G	A	synonymous_variant	LOW	ugt-63
551	V	6816142	C	A	missense_variant	MODERATE	dmsr-14
551	V	7067469	C	T	upstream_gene_variant	MODIFIER	Y57E12AR.1
551	V	10219263	G	A	upstream_gene_variant	MODIFIER	21ur-13198
551	V	10594075	T	A	upstream_gene_variant	MODIFIER	ttr-23
551	V	10594076	A	T	upstream_gene_variant	MODIFIER	ttr-23
551	V	13958071	A	G	upstream_gene_variant	MODIFIER	R10D12.8
551	V	17821539	T	A	upstream_gene_variant	MODIFIER	srh-300
551	V	17917617	G	A	upstream_gene_variant	MODIFIER	C06H5.8
551	V	18596659	T	A	intron_variant	MODIFIER	grdn-1
551	V	19018534	G	A	synonymous_variant	LOW	Y39B6A.30
551	V	20402046	T	C	intron_variant	MODIFIER	F53H2.3
551	X	648524	A	C	missense_variant	MODERATE	ifc-2
551	X	1811403	G	A	missense_variant	MODERATE	C14E2.3
551	X	4701230	C	T	upstream_gene_variant	MODIFIER	hyl-2
551	X	8580628	G	A	upstream_gene_variant	MODIFIER	F18E9.8
551	X	15775662	G	C	upstream_gene_variant	MODIFIER	Y7A5A.1
551	X	16429999	T	C	intergenic_region	MODIFIER	T24D11.2-F38E9.6
551	X	16547540	T	A	upstream_gene_variant	MODIFIER	K08B5.t1
553	I	653064	C	T	upstream_gene_variant	MODIFIER	Y65B4A.1
553	I	3389988	C	T	upstream_gene_variant	MODIFIER	F25F1.3
553	I	8674187	G	A	upstream_gene_variant	MODIFIER	K07A12.8
553	I	8761071	A	G	upstream_gene_variant	MODIFIER	C36B1.11
553	I	11860990	C	T	missense_variant	MODERATE	ced-1
553	I	12064190	C	A	upstream_gene_variant	MODIFIER	ksr-2
553	II	850742	G	T	upstream_gene_variant	MODIFIER	acdh-9
553	II	2714134	C	T	upstream_gene_variant	MODIFIER	T05A8.1
553	II	4078240	G	A	upstream_gene_variant	MODIFIER	R11F4.6
553	II	4818622	C	A	3_prime_UTR_variant	MODIFIER	lact-5
553	II	14454583	T	A	upstream_gene_variant	MODIFIER	21ur-12471
553	II	14686565	G	T	upstream_gene_variant	MODIFIER	ZC101.1
553	III	1138184	A	T	upstream_gene_variant	MODIFIER	lgc-46
553	III	10202760	C	T	upstream_gene_variant	MODIFIER	T20G5.13
553	III	11361243	C	T	downstream_gene_variant	MODIFIER	T28D6.14
553	IV	1027147	A	G	upstream_gene_variant	MODIFIER	mir-2209.3
553	IV	2614648	A	G	upstream_gene_variant	MODIFIER	Y69A2AR.28
553	IV	9013601	C	T	upstream_gene_variant	MODIFIER	acc-2
553	IV	14992105	T	A	upstream_gene_variant	MODIFIER	21ur-4842
553	IV	17085056	C	A	upstream_gene_variant	MODIFIER	snr-1
553	V	2828428	A	T	upstream_gene_variant	MODIFIER	T03D3.5
553	V	4984098	G	C	missense_variant	MODERATE	ncx-8
553	V	5552291	C	T	synonymous_variant	LOW	C18C4.5
553	V	6162700	C	A	intron_variant	MODIFIER	ttn-1
553	V	6709803	C	G	missense_variant	MODERATE	sna-1
553	V	6743297	A	G	upstream_gene_variant	MODIFIER	T25F10.8
553	V	9755333	T	A	upstream_gene_variant	MODIFIER	F58E6.4
553	V	15799902	C	A	upstream_gene_variant	MODIFIER	T26E4.10
553	X	630551	A	G	downstream_gene_variant	MODIFIER	pha-2
553	X	2288231	G	C	upstream_gene_variant	MODIFIER	sav-1
553	X	5593109	G	T	upstream_gene_variant	MODIFIER	unc-97
553	X	9443214	T	A	upstream_gene_variant	MODIFIER	memb-1
553	X	9598947	T	A	upstream_gene_variant	MODIFIER	C11E4.14
553	X	10023784	T	C	upstream_gene_variant	MODIFIER	F42G10.1
553	X	10260374	A	G	upstream_gene_variant	MODIFIER	C32A9.1
553	X	10554320	G	A	missense_variant	MODERATE	syd-2
553	X	10738825	G	T	intron_variant	MODIFIER	egl-36
553	X	10771255	G	T	upstream_gene_variant	MODIFIER	sma-9
553	X	14475484	C	A	upstream_gene_variant	MODIFIER	M163.13
553	X	15871054	T	A	downstream_gene_variant	MODIFIER	F53H4.4
553	X	17135422	C	A	upstream_gene_variant	MODIFIER	K09E3.7
554	I	2359489	C	T	downstream_gene_variant	MODIFIER	peel-1
554	I	3451184	T	A	downstream_gene_variant	MODIFIER	tag-63
554	I	4436664	A	C	upstream_gene_variant	MODIFIER	C41D11.3
554	I	7377750	G	T	missense_variant	MODERATE	unc-15
554	I	8934723	T	A	downstream_gene_variant	MODIFIER	tsp-15
554	I	14385047	C	G	upstream_gene_variant	MODIFIER	unc-95
554	I	14668511	C	A	upstream_gene_variant	MODIFIER	ero-1
554	I	14867382	A	T	upstream_gene_variant	MODIFIER	unc-54
554	I	14874838	T	A	downstream_gene_variant	MODIFIER	F11C3.1
554	II	85784	T	C	upstream_gene_variant	MODIFIER	C23H3.10
554	II	3347841	G	A	synonymous_variant	LOW	F14D2.8
554	II	3399861	G	A	missense_variant	MODERATE	nep-10
554	II	6125283	G	A	3_prime_UTR_variant	MODIFIER	C29H12.2
554	II	6707542	C	T	upstream_gene_variant	MODIFIER	rpy-1
554	II	9785463	T	A	upstream_gene_variant	MODIFIER	cyp-13A1
554	II	11979475	G	A	synonymous_variant	LOW	Y17G7B.20
554	II	12041910	A	G	upstream_gene_variant	MODIFIER	tpi-1
554	II	13924654	C	T	missense_variant	MODERATE	mltn-4
554	II	14788466	A	T	upstream_gene_variant	MODIFIER	Y54E2A.9
554	III	765132	C	T	upstream_gene_variant	MODIFIER	ptl-1
554	III	1898343	T	G	upstream_gene_variant	MODIFIER	B0524.5
554	III	2537584	C	T	intron_variant	MODIFIER	ceh-44
554	III	9092005	G	A	upstream_gene_variant	MODIFIER	F02A9.4
554	III	9396828	A	T	upstream_gene_variant	MODIFIER	gpr-2
554	III	11143718	T	C	synonymous_variant	LOW	Y47D3A.29
554	IV	402035	A	T	downstream_gene_variant	MODIFIER	T07A9.8
554	IV	1907521	T	A	upstream_gene_variant	MODIFIER	F55A8.5
554	IV	3437555	G	A	stop_gained	HIGH	srz-32
554	IV	6022561	T	A	upstream_gene_variant	MODIFIER	21ur-9861
554	IV	7214945	G	A	missense_variant	MODERATE	kcc-1
554	IV	9342685	A	T	missense_variant	MODERATE	T20D3.8
554	IV	13158079	T	A	upstream_gene_variant	MODIFIER	F09E8.2
554	V	331478	G	C	upstream_gene_variant	MODIFIER	abt-4
554	V	1093584	G	A	missense_variant	MODERATE	Y50D4B.4
554	V	1093592	A	C	synonymous_variant	LOW	Y50D4B.4
554	V	1093593	T	A	missense_variant	MODERATE	Y50D4B.4
554	V	1093595	T	A	stop_gained	HIGH	Y50D4B.4
554	V	3491643	G	A	upstream_gene_variant	MODIFIER	srbc-32
554	V	6408688	T	G	missense_variant	MODERATE	F57F4.4
554	V	7356855	G	A	upstream_gene_variant	MODIFIER	srh-231
554	V	9483837	T	A	upstream_gene_variant	MODIFIER	K06A4.6
554	V	10585102	T	A	missense_variant	MODERATE	T21C9.6
554	V	17498778	C	A	missense_variant	MODERATE	srh-261
554	V	18023116	A	G	upstream_gene_variant	MODIFIER	srh-307
554	V	19396415	A	G	upstream_gene_variant	MODIFIER	C25F9.t3
554	V	19539358	T	A	upstream_gene_variant	MODIFIER	Y43F8B.27
554	V	19554592	A	T	upstream_gene_variant	MODIFIER	Y43F8B.20
554	V	20682646	G	A	missense_variant	MODERATE	srsx-35
554	V	20895964	G	A	splice_donor_variant&intron_variant	HIGH	unc-80
554	X	2622218	T	A	upstream_gene_variant	MODIFIER	F54G2.3
554	X	4635468	C	A	missense_variant	MODERATE	C46C11.2
554	X	6240238	G	C	upstream_gene_variant	MODIFIER	hsp-43
554	X	6428127	A	T	upstream_gene_variant	MODIFIER	K10C2.11
554	X	10514196	G	C	upstream_gene_variant	MODIFIER	F14F3.7
554	X	11326217	T	A	upstream_gene_variant	MODIFIER	asm-2
554	X	13292144	A	T	upstream_gene_variant	MODIFIER	R04D3.4
554	X	14983083	A	T	upstream_gene_variant	MODIFIER	arl-7
565	I	120200	C	A	upstream_gene_variant	MODIFIER	21ur-13877
565	I	6486674	A	T	missense_variant	MODERATE	nmtn-1
565	I	9865046	G	A	missense_variant	MODERATE	K10C3.5
565	I	11998299	A	T	upstream_gene_variant	MODIFIER	Y53C10A.21
565	I	12984190	A	G	upstream_gene_variant	MODIFIER	nlp-15
565	I	13380314	A	C	upstream_gene_variant	MODIFIER	tads-1
565	I	14374019	A	T	synonymous_variant	LOW	bbs-1
565	II	308241	T	A	upstream_gene_variant	MODIFIER	col-69
565	II	675159	T	A	upstream_gene_variant	MODIFIER	sri-46
565	II	786422	A	G	upstream_gene_variant	MODIFIER	Y39F10A.2
565	II	839859	C	A	upstream_gene_variant	MODIFIER	F28A10.9
565	II	4369609	G	A	missense_variant	MODERATE	try-9
565	II	7787021	C	A	upstream_gene_variant	MODIFIER	C06A8.3
565	II	11876680	T	G	upstream_gene_variant	MODIFIER	npp-3
565	III	793729	C	T	upstream_gene_variant	MODIFIER	snt-2
565	III	6262062	G	A	synonymous_variant	LOW	srg-4
565	III	7513272	T	C	synonymous_variant	LOW	cls-1
565	III	7654489	T	A	missense_variant	MODERATE	flt-1
565	III	7766893	A	G	synonymous_variant	LOW	ZK686.5
565	III	8454958	T	C	upstream_gene_variant	MODIFIER	C30C11.8
565	IV	1933488	G	T	intron_variant	MODIFIER	denn-4
565	IV	1933489	A	T	intron_variant	MODIFIER	denn-4
565	IV	5020343	C	T	upstream_gene_variant	MODIFIER	T28H11.7
565	IV	8050768	A	T	upstream_gene_variant	MODIFIER	C26B2.11
565	V	1554331	C	G	upstream_gene_variant	MODIFIER	srsx-8
565	V	4449296	G	A	downstream_gene_variant	MODIFIER	gnrr-5
565	V	8195031	C	T	missense_variant&splice_region_variant	MODERATE	F20D6.10
565	V	8585834	T	A	upstream_gene_variant	MODIFIER	mir-358
565	V	9921803	A	T	upstream_gene_variant	MODIFIER	C50H2.7
565	V	9921807	T	G	upstream_gene_variant	MODIFIER	C50H2.7
565	V	11098157	C	T	upstream_gene_variant	MODIFIER	lact-8
565	V	12119768	G	T	upstream_gene_variant	MODIFIER	C13C4.9
565	V	15086511	C	T	missense_variant	MODERATE	C01G10.7
565	V	17951858	A	T	upstream_gene_variant	MODIFIER	dpy-21
565	V	18301472	C	T	upstream_gene_variant	MODIFIER	Y51A2A.14
565	V	19261235	C	T	missense_variant	MODERATE	F21D9.2
565	X	3216869	G	A	upstream_gene_variant	MODIFIER	F28B4.5
565	X	4245379	T	C	upstream_gene_variant	MODIFIER	W01H2.5
565	X	5057258	A	T	upstream_gene_variant	MODIFIER	Y64H9A.1
565	X	5771481	G	C	upstream_gene_variant	MODIFIER	C54H2.4
565	X	7270851	C	T	missense_variant	MODERATE	grd-7
565	X	7791963	A	G	upstream_gene_variant	MODIFIER	ZK154.5
565	X	12476286	A	C	upstream_gene_variant	MODIFIER	atf-6
565	X	12605870	G	A	downstream_gene_variant	MODIFIER	T24D5.11
565	X	12846890	G	A	synonymous_variant	LOW	chd-3
565	X	13308893	A	C	upstream_gene_variant	MODIFIER	srd-43
565	X	15098445	A	G	upstream_gene_variant	MODIFIER	F09B12.7
565	X	17113296	G	A	upstream_gene_variant	MODIFIER	K09E3.5
565	X	17373968	A	C	downstream_gene_variant	MODIFIER	F10D7.4
567	I	2865357	T	A	upstream_gene_variant	MODIFIER	Y71F9AL.21
567	I	10328579	G	T	upstream_gene_variant	MODIFIER	Y106G6G.2
567	I	13512849	G	A	upstream_gene_variant	MODIFIER	mir-1824
567	II	1477594	T	A	upstream_gene_variant	MODIFIER	H17B01.5
567	II	3289010	G	A	missense_variant	MODERATE	sri-63
567	II	8749819	G	A	upstream_gene_variant	MODIFIER	K08F8.12
567	II	8764194	C	T	upstream_gene_variant	MODIFIER	K08F8.5
567	II	12137499	A	T	upstream_gene_variant	MODIFIER	Y43F11A.6
567	II	13003983	A	T	upstream_gene_variant	MODIFIER	Y38F1A.8
567	II	14681287	G	A	missense_variant	MODERATE	ZC101.1
567	III	2051668	A	G	upstream_gene_variant	MODIFIER	dpy-1
567	III	2134572	T	A	intron_variant	MODIFIER	frl-1
567	III	2265942	T	A	upstream_gene_variant	MODIFIER	fbxa-42
567	III	3956823	T	A	upstream_gene_variant	MODIFIER	R10E9.3
567	III	4552826	G	T	upstream_gene_variant	MODIFIER	zbp-1
567	III	5240207	T	A	downstream_gene_variant	MODIFIER	mrps-26
567	III	5583143	G	A	start_lost	HIGH	uev-2
567	III	9325336	C	T	missense_variant	MODERATE	C40H1.7
567	III	13073173	T	C	intron_variant	MODIFIER	Y39E4B.6
567	IV	121267	A	T	upstream_gene_variant	MODIFIER	duo-2
567	IV	1424195	A	G	upstream_gene_variant	MODIFIER	Y77E11A.7
567	IV	4744646	C	A	3_prime_UTR_variant	MODIFIER	E04A4.5
567	IV	6339577	G	A	missense_variant	MODERATE	Y73B6BL.4
567	IV	6630359	G	A	upstream_gene_variant	MODIFIER	C01B10.10
567	IV	7322334	T	G	missense_variant	MODERATE	ifo-1
567	IV	9143550	A	T	upstream_gene_variant	MODIFIER	21ur-8153
567	IV	9511722	C	G	upstream_gene_variant	MODIFIER	ethe-1
567	IV	11739061	A	T	3_prime_UTR_variant	MODIFIER	K01A6.4
567	IV	12540852	C	T	upstream_gene_variant	MODIFIER	F53B2.14
567	IV	13526354	T	C	upstream_gene_variant	MODIFIER	dcap-2
567	IV	14126022	T	A	upstream_gene_variant	MODIFIER	21ur-6096
567	IV	15268582	A	T	upstream_gene_variant	MODIFIER	21ur-895
567	IV	17421577	G	A	upstream_gene_variant	MODIFIER	21ur-7751
567	V	2164272	A	G	upstream_gene_variant	MODIFIER	C45H4.14
567	V	8111484	G	A	downstream_gene_variant	MODIFIER	str-90
567	V	9347628	G	C	upstream_gene_variant	MODIFIER	tos-1
567	V	10064814	G	T	stop_gained	HIGH	fipr-13
567	V	11310113	G	A	upstream_gene_variant	MODIFIER	snf-11
567	V	13728673	C	A	upstream_gene_variant	MODIFIER	F35E12.2
567	V	18714281	T	A	downstream_gene_variant	MODIFIER	Y17D7C.5
567	V	20851977	C	T	upstream_gene_variant	MODIFIER	clec-264
567	X	634671	A	T	downstream_gene_variant	MODIFIER	M6.4
567	X	2755328	C	G	upstream_gene_variant	MODIFIER	F25H10.10
567	X	4499806	T	G	upstream_gene_variant	MODIFIER	dgk-2
567	X	5264913	G	A	splice_region_variant&synonymous_variant	LOW	Y34B4A.4
567	X	6533513	G	C	3_prime_UTR_variant	MODIFIER	ilys-5
567	X	6892369	A	G	upstream_gene_variant	MODIFIER	F41C6.14
567	X	9842735	G	A	upstream_gene_variant	MODIFIER	F47A4.5
567	X	11385071	T	C	upstream_gene_variant	MODIFIER	prmn-1
567	X	11591202	G	C	missense_variant	MODERATE	F52D10.2
567	X	16839599	C	A	upstream_gene_variant	MODIFIER	F41G4.7
574	I	2022040	T	A	upstream_gene_variant	MODIFIER	crtc-1
574	I	2293865	G	C	missense_variant	MODERATE	Y39G10AR.11
574	I	2858278	G	A	upstream_gene_variant	MODIFIER	W10C8.4
574	I	4441239	A	T	upstream_gene_variant	MODIFIER	eif-3.H
574	I	5303764	G	C	synonymous_variant	LOW	let-526
574	I	5757671	G	T	downstream_gene_variant	MODIFIER	che-14
574	I	6395544	G	C	upstream_gene_variant	MODIFIER	ZC328.2
574	I	8413655	G	T	upstream_gene_variant	MODIFIER	lin-28
574	I	13069363	G	T	downstream_gene_variant	MODIFIER	hpo-2
574	I	14161592	G	A	upstream_gene_variant	MODIFIER	C37A5.t1
574	II	1474523	A	G	upstream_gene_variant	MODIFIER	H17B01.5
574	II	2763662	T	G	upstream_gene_variant	MODIFIER	fbxb-108
574	II	4140273	G	T	upstream_gene_variant	MODIFIER	Y54C5A.1
574	II	4608937	G	T	upstream_gene_variant	MODIFIER	pqn-35
574	II	8166213	C	A	missense_variant	MODERATE	rrf-3
574	II	10835056	G	C	intron_variant	MODIFIER	mix-1
574	II	11511144	G	T	upstream_gene_variant	MODIFIER	B0334.16
574	II	13206980	A	T	intron_variant	MODIFIER	btf-1
574	II	13240597	C	A	upstream_gene_variant	MODIFIER	rmo-1
574	III	3526790	A	T	upstream_gene_variant	MODIFIER	rpl-37
574	III	4608452	C	A	missense_variant	MODERATE	sel-2
574	III	10757434	G	A	splice_region_variant&synonymous_variant	LOW	rnf-113
574	IV	239368	C	A	upstream_gene_variant	MODIFIER	R02D3.4
574	IV	3079918	C	T	upstream_gene_variant	MODIFIER	Y67D8C.22
574	IV	3496108	A	C	upstream_gene_variant	MODIFIER	ceh-53
574	IV	3626548	A	G	upstream_gene_variant	MODIFIER	cha-1
574	IV	12110561	T	A	upstream_gene_variant	MODIFIER	col-129
574	IV	13484735	T	A	upstream_gene_variant	MODIFIER	Y38H8A.10
574	IV	16215784	T	A	upstream_gene_variant	MODIFIER	H25K10.2
574	V	4170138	C	A	synonymous_variant	LOW	coh-4
574	V	9750337	G	T	synonymous_variant	LOW	F58E6.4
574	V	14433927	A	T	upstream_gene_variant	MODIFIER	egl-1
574	V	14433930	G	T	upstream_gene_variant	MODIFIER	egl-1
574	V	15166207	A	C	splice_region_variant&intron_variant	LOW	T09F5.12
574	V	18375792	T	A	upstream_gene_variant	MODIFIER	C08E8.t3
574	V	19544568	G	T	missense_variant	MODERATE	Y43F8B.1
574	V	20893229	C	T	upstream_gene_variant	MODIFIER	F25C8.6
574	X	2311132	A	G	synonymous_variant	LOW	hum-6
574	X	6747081	A	T	upstream_gene_variant	MODIFIER	R03E9.10
574	X	7103220	A	T	upstream_gene_variant	MODIFIER	C36B7.6
574	X	11666029	A	T	upstream_gene_variant	MODIFIER	sfxn-1.5
574	X	11993590	G	A	synonymous_variant	LOW	C49F5.t1
574	X	11993628	A	C	upstream_gene_variant	MODIFIER	linc-15
574	X	13786160	G	A	missense_variant	MODERATE	F55F3.4
574	X	14192574	C	T	downstream_gene_variant	MODIFIER	ceh-37
574	X	15301701	T	A	upstream_gene_variant	MODIFIER	C02D4.10
577	I	828317	T	C	missense_variant	MODERATE	zfh-2
577	I	1386991	T	A	upstream_gene_variant	MODIFIER	Y92H12BL.4
577	I	2773718	G	T	upstream_gene_variant	MODIFIER	Y71F9B.1
577	I	5017318	C	A	upstream_gene_variant	MODIFIER	F54C1.6
577	I	6611204	A	T	upstream_gene_variant	MODIFIER	maco-1
577	I	9885633	T	C	upstream_gene_variant	MODIFIER	nhr-69
577	I	11714657	C	A	upstream_gene_variant	MODIFIER	oac-19
577	II	905911	G	T	stop_gained	HIGH	fbxa-200
577	II	7890242	A	G	upstream_gene_variant	MODIFIER	T01H3.6
577	II	8227960	T	C	synonymous_variant	LOW	dab-1
577	II	9934975	T	A	upstream_gene_variant	MODIFIER	C05C10.5
577	II	11647713	C	T	missense_variant&splice_region_variant	MODERATE	ghi-1
577	II	14139250	C	G	upstream_gene_variant	MODIFIER	cacn-1
577	III	828194	G	T	upstream_gene_variant	MODIFIER	linc-37
577	III	1794715	T	A	upstream_gene_variant	MODIFIER	Y39A3CL.9
577	III	4023167	C	T	downstream_gene_variant	MODIFIER	C36E8.10
577	III	5235133	G	T	missense_variant	MODERATE	mrps-26
577	III	5831219	G	C	missense_variant	MODERATE	mdt-15
577	III	9353152	T	A	missense_variant	MODERATE	K04H4.2
577	IV	1852733	T	C	upstream_gene_variant	MODIFIER	egl-4
577	IV	1884641	A	G	downstream_gene_variant	MODIFIER	egl-4
577	IV	3438410	G	T	missense_variant	MODERATE	grd-13
577	IV	5963014	G	A	upstream_gene_variant	MODIFIER	21ur-9340
577	IV	6337996	A	T	upstream_gene_variant	MODIFIER	mif-4
577	IV	8141373	T	C	upstream_gene_variant	MODIFIER	pmk-2
577	IV	12582899	G	A	upstream_gene_variant	MODIFIER	K08E7.6
577	IV	12776100	A	T	upstream_gene_variant	MODIFIER	unc-31
577	IV	15529600	T	A	upstream_gene_variant	MODIFIER	tag-349
577	V	1058607	G	C	missense_variant	MODERATE	str-224
577	V	1623963	C	A	missense_variant	MODERATE	nhr-110
577	V	1628406	A	T	splice_region_variant&intron_variant	LOW	nhr-238
577	V	8684315	G	A	missense_variant	MODERATE	cln-3.3
577	V	9625920	C	T	synonymous_variant	LOW	T06E4.14
577	V	11436023	A	G	upstream_gene_variant	MODIFIER	F57B7.8
577	V	14752782	G	A	upstream_gene_variant	MODIFIER	lipl-8
577	V	15045682	T	C	missense_variant	MODERATE	sdc-3
577	V	17564400	A	T	upstream_gene_variant	MODIFIER	C38D9.2
577	V	18450541	C	G	upstream_gene_variant	MODIFIER	ZK228.11
577	V	18612830	C	T	missense_variant	MODERATE	grdn-1
577	V	20219150	A	T	upstream_gene_variant	MODIFIER	Y113G7B.11
577	X	1333259	C	T	upstream_gene_variant	MODIFIER	F21E9.2
577	X	3413327	C	T	upstream_gene_variant	MODIFIER	unc-78
577	X	4729253	C	A	upstream_gene_variant	MODIFIER	acc-3
577	X	6321453	T	A	upstream_gene_variant	MODIFIER	T10E10.10
577	X	8055095	C	T	upstream_gene_variant	MODIFIER	dim-1
577	X	11674760	T	C	synonymous_variant	LOW	T04F8.9
577	X	15818395	T	A	upstream_gene_variant	MODIFIER	Y7A5A.21
577	X	17190790	T	G	downstream_gene_variant	MODIFIER	B0302.5
577	X	17286907	G	T	downstream_gene_variant	MODIFIER	C33E10.4
578	I	5575462	A	T	upstream_gene_variant	MODIFIER	cey-3
578	I	12002271	A	G	splice_acceptor_variant&intron_variant	HIGH	Y53C10A.5
578	I	13983423	A	T	upstream_gene_variant	MODIFIER	mir-1818
578	II	463221	G	A	upstream_gene_variant	MODIFIER	W10D9.3
578	II	1115568	T	A	upstream_gene_variant	MODIFIER	lips-11
578	II	3443286	A	T	upstream_gene_variant	MODIFIER	C16C8.t2
578	II	6192308	C	T	upstream_gene_variant	MODIFIER	F40H3.6
578	II	6880796	C	T	synonymous_variant	LOW	pmp-1
578	II	8728614	C	T	upstream_gene_variant	MODIFIER	T01B7.12
578	II	11276723	G	T	upstream_gene_variant	MODIFIER	C47G2.16
578	II	11641135	G	A	missense_variant	MODERATE	kin-6
578	II	12753475	C	A	missense_variant	MODERATE	Y46G5A.39
578	III	7999797	G	A	upstream_gene_variant	MODIFIER	npr-17
578	III	10420417	G	T	stop_gained	HIGH	ymel-1
578	IV	3343817	T	A	upstream_gene_variant	MODIFIER	fbxa-130
578	IV	4469347	G	A	synonymous_variant	LOW	M01H9.3
578	IV	5459777	G	T	upstream_gene_variant	MODIFIER	Y4C6A.68
578	IV	13261078	C	T	downstream_gene_variant	MODIFIER	bus-12
578	IV	14595487	T	A	upstream_gene_variant	MODIFIER	21ur-13308
578	IV	15983583	C	G	missense_variant	MODERATE	Y105C5B.19
578	IV	17019654	T	A	upstream_gene_variant	MODIFIER	21ur-10373
578	V	276216	C	A	upstream_gene_variant	MODIFIER	Y58G8A.5
578	V	1373815	G	C	missense_variant	MODERATE	rga-4
578	V	2213415	G	A	synonymous_variant	LOW	nhr-184
578	V	2717377	A	T	upstream_gene_variant	MODIFIER	srt-28
578	V	5082043	A	C	3_prime_UTR_variant	MODIFIER	Y58A7A.4
578	V	9237439	G	A	missense_variant	MODERATE	glo-4
578	V	9757011	A	T	missense_variant	MODERATE	F58E6.11
578	V	13330368	C	A	missense_variant	MODERATE	nhr-129
578	V	19562471	C	T	upstream_gene_variant	MODIFIER	B0399.t16
578	X	143722	C	A	upstream_gene_variant	MODIFIER	Y73B3A.8
578	X	143723	G	A	upstream_gene_variant	MODIFIER	Y73B3A.8
578	X	143725	C	T	upstream_gene_variant	MODIFIER	Y73B3A.8
578	X	1538495	G	C	synonymous_variant	LOW	K06A9.2
578	X	7131019	G	A	upstream_gene_variant	MODIFIER	C54D1.8
578	X	9533978	T	C	missense_variant	MODERATE	C07B5.4
578	X	12123818	G	C	upstream_gene_variant	MODIFIER	lgc-18
579	I	370796	A	T	downstream_gene_variant	MODIFIER	rnp-8
579	I	6259794	C	A	upstream_gene_variant	MODIFIER	C48E7.1
579	I	7540500	G	T	missense_variant	MODERATE	dcp-66
579	I	8360897	G	A	downstream_gene_variant	MODIFIER	tba-5
579	I	13283771	C	T	splice_region_variant&intron_variant	LOW	M01E5.3
579	I	13376521	T	G	upstream_gene_variant	MODIFIER	C01A2.9
579	II	3852980	C	G	upstream_gene_variant	MODIFIER	nhr-72
579	II	5084044	C	T	3_prime_UTR_variant	MODIFIER	pld-1
579	II	8430731	A	T	upstream_gene_variant	MODIFIER	F14E5.2
579	II	13839809	G	A	synonymous_variant	LOW	F08G2.7
579	III	130478	T	C	splice_region_variant&synonymous_variant	LOW	nhr-280
579	III	143501	T	A	upstream_gene_variant	MODIFIER	fbxb-81
579	III	5401621	A	G	missense_variant	MODERATE	Y32H12A.8
579	III	5495094	T	A	upstream_gene_variant	MODIFIER	R02F2.9
579	III	6581721	T	A	upstream_gene_variant	MODIFIER	F27B3.6
579	III	8301844	T	C	downstream_gene_variant	MODIFIER	F10E9.7
579	III	8620075	A	T	upstream_gene_variant	MODIFIER	C06E1.11
579	III	9908313	G	T	upstream_gene_variant	MODIFIER	F40F12.11
579	III	11664289	A	C	intron_variant	MODIFIER	crh-1
579	III	12862934	G	A	upstream_gene_variant	MODIFIER	Y37D8A.27
579	IV	9192856	T	C	upstream_gene_variant	MODIFIER	C46C2.8
579	IV	10856569	G	A	missense_variant	MODERATE	T11G6.2
579	IV	15896498	T	C	upstream_gene_variant	MODIFIER	srv-14
579	IV	15896506	A	T	upstream_gene_variant	MODIFIER	srv-14
579	IV	16823626	A	G	upstream_gene_variant	MODIFIER	21ur-4883
579	IV	16823631	T	C	splice_region_variant&intron_variant	LOW	Y116A8A.4
579	IV	16823674	T	C	missense_variant	MODERATE	Y116A8A.4
579	V	823191	G	A	upstream_gene_variant	MODIFIER	srx-32
579	V	4794308	G	C	upstream_gene_variant	MODIFIER	R02F11.2
579	V	5296454	G	C	intergenic_region	MODIFIER	Y49G5A.1-ncx-2
579	V	8953640	C	A	missense_variant	MODERATE	gck-1
579	V	10959030	T	A	3_prime_UTR_variant	MODIFIER	vps-36
579	V	11576179	G	T	upstream_gene_variant	MODIFIER	srx-91
579	V	12743997	A	T	missense_variant	MODERATE	asp-10
579	V	13394705	C	T	upstream_gene_variant	MODIFIER	somi-1
579	V	15738855	A	T	upstream_gene_variant	MODIFIER	str-27
579	V	16022884	A	G	upstream_gene_variant	MODIFIER	T10C6.5
579	V	16539842	C	T	upstream_gene_variant	MODIFIER	Y32B12B.2
579	V	17624920	T	C	upstream_gene_variant	MODIFIER	F57G4.11
579	V	20500460	A	C	missense_variant	MODERATE	dct-14
579	X	5745336	C	T	upstream_gene_variant	MODIFIER	gnrr-4
579	X	5829802	G	A	missense_variant	MODERATE	acp-5
579	X	8068156	G	A	upstream_gene_variant	MODIFIER	C18A11.1
579	X	14895726	C	T	synonymous_variant	LOW	nac-1
579	X	17186581	A	C	splice_acceptor_variant&intron_variant	HIGH	sid-3
579	X	17573719	C	T	upstream_gene_variant	MODIFIER	frpr-7
580	I	1000987	G	C	upstream_gene_variant	MODIFIER	C54G6.7
580	I	2408758	A	T	upstream_gene_variant	MODIFIER	Y39G10AR.24
580	I	4434429	G	A	upstream_gene_variant	MODIFIER	C41D11.3
580	I	8479395	G	A	upstream_gene_variant	MODIFIER	D1081.12
580	I	12309098	T	C	missense_variant	MODERATE	oac-35
580	I	12404490	G	A	upstream_gene_variant	MODIFIER	T15D6.12
580	I	12584104	T	A	upstream_gene_variant	MODIFIER	F33E2.10
580	II	1921346	T	A	upstream_gene_variant	MODIFIER	bath-11
580	II	3012823	G	A	upstream_gene_variant	MODIFIER	C41H7.9
580	II	3033303	A	T	upstream_gene_variant	MODIFIER	B0454.22
580	II	3256537	A	T	intron_variant	MODIFIER	gcy-19
580	II	5562327	C	T	missense_variant	MODERATE	C17C3.3
580	II	12541356	C	T	missense_variant	MODERATE	F49C5.4
580	II	12952851	G	A	missense_variant	MODERATE	Y38F1A.1
580	III	2033832	G	C	upstream_gene_variant	MODIFIER	M01E10.5
580	III	6950802	G	A	synonymous_variant	LOW	let-711
580	III	10757480	C	T	upstream_gene_variant	MODIFIER	hpl-2
580	IV	225002	T	C	downstream_gene_variant	MODIFIER	prdx-6
580	IV	653897	G	T	upstream_gene_variant	MODIFIER	K11H12.1
580	IV	3607209	C	A	missense_variant	MODERATE	kgb-2
580	IV	4080842	T	A	synonymous_variant	LOW	C35B1.9
580	IV	5566862	A	G	upstream_gene_variant	MODIFIER	21ur-9840
580	IV	5737382	A	G	upstream_gene_variant	MODIFIER	H35B03.2
580	IV	5834461	G	A	upstream_gene_variant	MODIFIER	21ur-5141
580	IV	7665826	G	T	synonymous_variant	LOW	C08G9.2
580	IV	8342596	C	T	upstream_gene_variant	MODIFIER	F17E9.14
580	IV	10610160	T	G	downstream_gene_variant	MODIFIER	R09H10.2
580	IV	13540164	T	A	missense_variant	MODERATE	rsd-2
580	V	2216512	T	A	upstream_gene_variant	MODIFIER	nhr-133
580	V	3032590	A	T	3_prime_UTR_variant	MODIFIER	srw-8
580	V	6606225	T	C	upstream_gene_variant	MODIFIER	ZK1055.6
580	V	8522747	T	G	splice_region_variant&intron_variant	LOW	otpl-7
580	V	12153654	A	T	upstream_gene_variant	MODIFIER	che-11
580	V	13593561	G	T	upstream_gene_variant	MODIFIER	F53F4.2
580	X	496094	A	C	upstream_gene_variant	MODIFIER	B0310.9
580	X	4239474	C	T	upstream_gene_variant	MODIFIER	W01H2.t1
580	X	7913104	T	A	intron_variant	MODIFIER	C39D10.7
580	X	11467358	G	A	upstream_gene_variant	MODIFIER	T25C12.8
580	X	11467359	G	A	upstream_gene_variant	MODIFIER	T25C12.8
580	X	11523954	T	C	missense_variant	MODERATE	sdc-2
580	X	12442943	C	A	synonymous_variant	LOW	T18D3.7
580	X	12442945	C	A	missense_variant	MODERATE	T18D3.7
580	X	13652504	T	C	upstream_gene_variant	MODIFIER	C40C9.t1
580	X	14115697	G	A	missense_variant	MODERATE	F28H6.t1
580	X	14351195	A	G	missense_variant	MODERATE	wdr-5.2
580	X	14909933	T	G	upstream_gene_variant	MODIFIER	hex-5
581	I	2014728	T	A	upstream_gene_variant	MODIFIER	gap-3
581	I	2942988	G	A	synonymous_variant	LOW	cogc-3
581	I	2945626	G	A	upstream_gene_variant	MODIFIER	Y71F9AM.8
581	I	6399482	T	A	upstream_gene_variant	MODIFIER	ZC328.6
581	I	12252097	G	T	missense_variant	MODERATE	nhr-265
581	I	12846864	G	A	downstream_gene_variant	MODIFIER	ptr-17
581	II	534301	A	G	upstream_gene_variant	MODIFIER	T27A1.2
581	II	1835331	G	A	synonymous_variant	LOW	T08E11.8
581	II	3140565	T	G	upstream_gene_variant	MODIFIER	sri-54
581	II	3140567	T	A	upstream_gene_variant	MODIFIER	sri-54
581	II	3140569	C	A	upstream_gene_variant	MODIFIER	sri-54
581	II	3140572	C	T	upstream_gene_variant	MODIFIER	sri-54
581	II	3140578	G	A	upstream_gene_variant	MODIFIER	sri-54
581	II	6916475	C	A	upstream_gene_variant	MODIFIER	cyn-10
581	II	9721138	T	C	upstream_gene_variant	MODIFIER	wee-1.3
581	II	14004190	G	A	upstream_gene_variant	MODIFIER	F01D5.3
581	III	1920867	C	T	downstream_gene_variant	MODIFIER	B0524.10
581	III	3685333	T	A	intron_variant	MODIFIER	npr-15
581	III	4525547	G	A	missense_variant	MODERATE	cdh-4
581	III	4615094	C	T	upstream_gene_variant	MODIFIER	sel-2
581	III	5317191	T	A	upstream_gene_variant	MODIFIER	F52C9.3
581	III	5599279	C	T	upstream_gene_variant	MODIFIER	F56D2.9
581	III	8845265	G	T	upstream_gene_variant	MODIFIER	F44E2.6
581	III	9739159	C	A	3_prime_UTR_variant	MODIFIER	T05G5.1
581	III	9929852	T	A	upstream_gene_variant	MODIFIER	ttr-3
581	III	10970396	G	A	missense_variant	MODERATE	dhc-4
581	III	12892350	A	T	upstream_gene_variant	MODIFIER	unc-71
581	IV	478786	T	A	upstream_gene_variant	MODIFIER	M04G7.4
581	IV	1269719	C	A	downstream_gene_variant	MODIFIER	F38A1.13
581	IV	2435545	A	C	upstream_gene_variant	MODIFIER	C45G7.8
581	IV	3271706	A	T	upstream_gene_variant	MODIFIER	clec-173
581	IV	5148772	T	G	upstream_gene_variant	MODIFIER	21ur-7064
581	IV	5380034	T	A	upstream_gene_variant	MODIFIER	elo-5
581	IV	9326958	G	A	synonymous_variant	LOW	F49C12.15
581	IV	10318034	A	T	splice_region_variant&intron_variant	LOW	R09E10.2
581	IV	10514686	T	A	upstream_gene_variant	MODIFIER	21ur-15302
581	IV	11068905	A	T	upstream_gene_variant	MODIFIER	ttr-16
581	IV	11076212	T	G	missense_variant	MODERATE	Y5F2A.4
581	IV	17166434	C	T	upstream_gene_variant	MODIFIER	21ur-3332
581	V	97112	A	T	intergenic_region	MODIFIER	F56E10.6-21ur-15058
581	V	9224305	C	A	3_prime_UTR_variant	MODIFIER	grd-6
581	V	10564588	G	A	upstream_gene_variant	MODIFIER	F32G8.9
581	V	11674680	T	G	upstream_gene_variant	MODIFIER	lgc-44
581	V	14745927	A	T	upstream_gene_variant	MODIFIER	Y50E8A.6
581	V	16231892	A	G	upstream_gene_variant	MODIFIER	F21H7.2
581	V	16820316	T	C	missense_variant	MODERATE	T20B3.1
581	V	17831908	G	T	stop_gained	HIGH	srh-303
581	V	17916429	T	A	upstream_gene_variant	MODIFIER	C06H5.8
581	V	20061474	T	G	upstream_gene_variant	MODIFIER	ttx-1
581	X	5891231	T	C	missense_variant	MODERATE	F49E10.2
581	X	6609956	A	T	upstream_gene_variant	MODIFIER	C25B8.8
581	X	7675412	T	A	upstream_gene_variant	MODIFIER	F27D9.7
581	X	10979538	C	A	upstream_gene_variant	MODIFIER	pxn-2
581	X	17531817	G	A	3_prime_UTR_variant	MODIFIER	sup-10
582	I	1221289	T	A	upstream_gene_variant	MODIFIER	Y48G8AL.16
582	I	1538126	A	T	intron_variant	MODIFIER	Y92H12A.4
582	I	2034950	T	C	downstream_gene_variant	MODIFIER	crtc-1
582	I	2731797	G	A	upstream_gene_variant	MODIFIER	Y71F9B.2
582	I	9050699	T	A	upstream_gene_variant	MODIFIER	C31H5.6
582	II	3081076	A	C	upstream_gene_variant	MODIFIER	Y25C1A.8
582	II	8083098	T	A	downstream_gene_variant	MODIFIER	K02C4.5
582	III	1642390	C	G	downstream_gene_variant	MODIFIER	Y22D7AL.4
582	III	2141784	G	A	missense_variant&splice_region_variant	MODERATE	frl-1
582	III	4739144	T	A	upstream_gene_variant	MODIFIER	F17C8.13
582	III	5445048	T	A	stop_gained	HIGH	disl-2
582	III	7578947	T	A	downstream_gene_variant	MODIFIER	lpd-7
582	III	10087861	T	A	synonymous_variant	LOW	hal-2
582	III	10087862	A	C	missense_variant	MODERATE	hal-2
582	III	10223827	A	G	downstream_gene_variant	MODIFIER	T20G5.14
582	IV	3092689	T	A	intergenic_region	MODIFIER	Y67D8C.17-mca-3
582	IV	5857929	A	T	upstream_gene_variant	MODIFIER	21ur-11900
582	IV	7150270	C	T	synonymous_variant	LOW	C34D4.4
582	IV	10720695	C	A	intron_variant	MODIFIER	ncx-3
582	IV	11374185	T	A	missense_variant	MODERATE	cbd-1
582	V	648883	G	A	upstream_gene_variant	MODIFIER	F48G7.12
582	V	1380191	G	A	synonymous_variant	LOW	rga-4
582	V	7882310	C	G	downstream_gene_variant	MODIFIER	F40A3.3
582	V	9190129	A	T	upstream_gene_variant	MODIFIER	C24B5.1
582	V	13323260	G	T	missense_variant	MODERATE	C50B6.7
582	V	14739218	C	A	missense_variant	MODERATE	Y50E8A.6
582	V	15242805	G	A	upstream_gene_variant	MODIFIER	srw-12
582	V	15426531	C	T	upstream_gene_variant	MODIFIER	fbxa-104
582	V	16382305	G	A	synonymous_variant	LOW	F13A7.7
582	V	19202488	G	C	missense_variant	MODERATE	Y39B6A.1
582	V	20059658	A	G	intron_variant	MODIFIER	ttx-1
582	X	607359	G	C	missense_variant	MODERATE	F13C5.5
582	X	754017	C	T	downstream_gene_variant	MODIFIER	C02H7.4
582	X	1524447	T	A	upstream_gene_variant	MODIFIER	toca-1
582	X	6418173	A	C	upstream_gene_variant	MODIFIER	T22E5.6
582	X	7107654	A	C	intron_variant	MODIFIER	C36B7.2
582	X	8002068	C	T	upstream_gene_variant	MODIFIER	sdpn-1
582	X	10267404	C	G	intergenic_region	MODIFIER	C32A9.1-F41E7.2
582	X	11275352	C	T	3_prime_UTR_variant	MODIFIER	ifa-1
582	X	11462105	A	G	upstream_gene_variant	MODIFIER	T25C12.10
582	X	11830990	A	G	missense_variant	MODERATE	tag-241
582	X	12847343	C	T	missense_variant	MODERATE	chd-3
582	X	15060813	G	C	upstream_gene_variant	MODIFIER	H03G16.5
582	X	15866977	A	C	upstream_gene_variant	MODIFIER	csb-1
582	X	15970188	A	T	intron_variant	MODIFIER	pqn-11
582	X	16975806	G	A	downstream_gene_variant	MODIFIER	F52G3.1
582	X	17209384	A	T	upstream_gene_variant	MODIFIER	T08G2.2
584	I	957030	T	A	intron_variant	MODIFIER	mig-1
584	I	1154418	A	T	upstream_gene_variant	MODIFIER	Y48G8AL.10
584	I	1953633	A	C	upstream_gene_variant	MODIFIER	Y51F10.15
584	I	2181281	A	T	upstream_gene_variant	MODIFIER	afd-1
584	I	5240822	T	A	upstream_gene_variant	MODIFIER	mrpl-47
584	I	9364124	A	T	3_prime_UTR_variant	MODIFIER	dyf-5
584	I	9409053	C	T	missense_variant	MODERATE	C17E4.1
584	I	9792624	A	T	upstream_gene_variant	MODIFIER	tba-1
584	I	11504524	A	G	synonymous_variant	LOW	F32B4.8
584	I	14287575	A	T	upstream_gene_variant	MODIFIER	fbxb-69
584	II	184097	T	G	downstream_gene_variant	MODIFIER	T01D1.5
584	II	1194995	A	T	upstream_gene_variant	MODIFIER	F53A10.2
584	II	1374584	C	A	synonymous_variant	LOW	rog-1
584	II	2566938	T	C	upstream_gene_variant	MODIFIER	nep-18
584	II	3153353	T	G	missense_variant	MODERATE	sri-32
584	II	7685709	T	A	downstream_gene_variant	MODIFIER	lir-1
584	II	9637924	G	A	missense_variant	MODERATE	ZK1307.7
584	II	11104640	T	A	upstream_gene_variant	MODIFIER	C09H10.5
584	II	12605060	C	G	upstream_gene_variant	MODIFIER	ceh-100
584	II	14075951	C	T	upstream_gene_variant	MODIFIER	Y39G8C.13
584	III	516166	G	A	synonymous_variant	LOW	T22F7.5
584	III	4184594	A	T	upstream_gene_variant	MODIFIER	C16C10.1
584	III	9582401	T	A	upstream_gene_variant	MODIFIER	ced-7
584	III	11672850	A	G	upstream_gene_variant	MODIFIER	Y41C4A.30
584	IV	1285788	C	T	upstream_gene_variant	MODIFIER	plst-1
584	IV	3783904	A	T	intergenic_region	MODIFIER	vab-2-W07G9.3
584	IV	4138624	A	G	synonymous_variant	LOW	F49F1.10
584	IV	5266067	A	C	upstream_gene_variant	MODIFIER	F36H12.14
584	IV	5974699	T	C	upstream_gene_variant	MODIFIER	21ur-664
584	IV	7121454	T	A	upstream_gene_variant	MODIFIER	C34D4.10
584	IV	9289678	C	T	upstream_gene_variant	MODIFIER	nhr-267
584	IV	9923662	T	C	upstream_gene_variant	MODIFIER	F25H8.12
584	IV	10084908	G	T	synonymous_variant	LOW	col-2
584	IV	10084909	G	A	missense_variant	MODERATE	col-2
584	IV	13742604	G	A	upstream_gene_variant	MODIFIER	21ur-4019
584	IV	15466653	G	C	upstream_gene_variant	MODIFIER	ntl-11
584	MtDNA	12626	T	C	synonymous_variant	LOW	nduo-5
584	V	1105447	C	A	downstream_gene_variant	MODIFIER	Y50D4B.2
584	V	1263130	C	T	missense_variant	MODERATE	rab-1
584	V	4566901	A	G	missense_variant	MODERATE	sut-2
584	V	5373578	C	A	upstream_gene_variant	MODIFIER	T09D3.9
584	V	5565096	T	A	upstream_gene_variant	MODIFIER	C18C4.12
584	V	6654568	C	T	missense_variant	MODERATE	syx-18
584	V	8185121	A	T	missense_variant	MODERATE	srp-8
584	V	11747014	G	A	missense_variant	MODERATE	T04F3.1
584	X	1698416	G	A	upstream_gene_variant	MODIFIER	C36C9.4
584	X	2129012	G	A	upstream_gene_variant	MODIFIER	F53B1.t1
584	X	3601105	C	T	upstream_gene_variant	MODIFIER	T27A10.6
584	X	7942658	G	A	missense_variant	MODERATE	tnt-3
584	X	11500805	A	T	upstream_gene_variant	MODIFIER	T25C12.3
584	X	12733470	G	A	missense_variant	MODERATE	pgp-12
584	X	15303311	C	T	upstream_gene_variant	MODIFIER	C02D4.6
585	I	2469220	T	A	upstream_gene_variant	MODIFIER	inx-19
585	I	7343019	G	A	upstream_gene_variant	MODIFIER	F52A8.6
585	I	7407628	C	T	upstream_gene_variant	MODIFIER	col-62
585	II	541322	T	C	downstream_gene_variant	MODIFIER	T27A1.3
585	II	1481501	C	A	upstream_gene_variant	MODIFIER	H17B01.t4
585	II	4355828	T	A	synonymous_variant	LOW	H20J04.1
585	II	9692309	T	A	upstream_gene_variant	MODIFIER	nlp-11
585	II	10782134	A	T	synonymous_variant	LOW	ect-2
585	II	12140922	A	C	missense_variant	MODERATE	Y57A10A.1
585	II	12259338	G	T	missense_variant	MODERATE	Y57A10A.10
585	II	12635602	C	T	upstream_gene_variant	MODIFIER	Y38E10A.17
585	II	13038588	G	A	upstream_gene_variant	MODIFIER	F18A11.3
585	II	14932929	A	C	intron_variant	MODIFIER	pde-3
585	III	1109835	T	A	downstream_gene_variant	MODIFIER	F58B6.1
585	III	2794431	A	C	missense_variant	MODERATE	twk-45
585	IV	732163	C	G	upstream_gene_variant	MODIFIER	Y55F3C.9
585	IV	1033698	C	A	upstream_gene_variant	MODIFIER	Y55F3AM.10
585	IV	1656232	C	A	upstream_gene_variant	MODIFIER	Y41D4B.35
585	IV	6437436	C	T	upstream_gene_variant	MODIFIER	21ur-15410
585	IV	6457176	C	G	upstream_gene_variant	MODIFIER	21ur-6018
585	IV	10377160	C	A	upstream_gene_variant	MODIFIER	mpz-5
585	IV	12925795	C	T	upstream_gene_variant	MODIFIER	C32H11.5
585	IV	14739125	T	G	upstream_gene_variant	MODIFIER	21ur-11500
585	V	413329	C	T	upstream_gene_variant	MODIFIER	linc-32
585	V	4861871	A	C	upstream_gene_variant	MODIFIER	srd-32
585	V	9687559	T	C	upstream_gene_variant	MODIFIER	ZK287.4
585	V	11028954	G	T	missense_variant	MODERATE	pptr-2
585	V	13318992	G	T	upstream_gene_variant	MODIFIER	col-161
585	V	16395732	A	T	upstream_gene_variant	MODIFIER	F13A7.15
585	V	18283273	G	A	upstream_gene_variant	MODIFIER	Y51A2A.16
585	V	19157679	T	G	3_prime_UTR_variant	MODIFIER	tsp-13
585	V	19184133	A	T	upstream_gene_variant	MODIFIER	hot-2
585	X	3910664	A	T	upstream_gene_variant	MODIFIER	T22B2.9
585	X	4807444	C	T	3_prime_UTR_variant	MODIFIER	ztf-16
585	X	6474654	T	A	upstream_gene_variant	MODIFIER	C15B12.4
585	X	8117618	A	C	downstream_gene_variant	MODIFIER	K07E3.1
585	X	9167184	G	T	missense_variant	MODERATE	B0563.10
585	X	11546549	G	A	upstream_gene_variant	MODIFIER	C35C5.3
586	I	1382703	T	A	downstream_gene_variant	MODIFIER	Y92H12BM.1
586	I	2015951	T	A	upstream_gene_variant	MODIFIER	Y20F4.11
586	I	3275654	A	T	upstream_gene_variant	MODIFIER	W01B11.7
586	I	3275668	C	T	upstream_gene_variant	MODIFIER	W01B11.7
586	I	8298440	C	T	upstream_gene_variant	MODIFIER	npp-2
586	I	8316404	C	T	missense_variant	MODERATE	F52B5.2
586	I	9143676	T	C	upstream_gene_variant	MODIFIER	ZK858.6
586	I	11172496	C	T	upstream_gene_variant	MODIFIER	Y52B11C.1
586	I	14234821	C	T	upstream_gene_variant	MODIFIER	eya-1
586	II	1605013	A	G	synonymous_variant	LOW	bath-33
586	II	3455941	G	C	upstream_gene_variant	MODIFIER	C16C8.19
586	II	4085028	T	A	missense_variant	MODERATE	R11F4.2
586	II	5818454	G	T	upstream_gene_variant	MODIFIER	wago-5
586	II	6050571	A	C	missense_variant	MODERATE	R12C12.1
586	II	6093212	G	A	stop_gained	HIGH	tpp-2
586	II	10919649	C	T	synonymous_variant	LOW	tba-4
586	II	13349454	T	C	upstream_gene_variant	MODIFIER	dmsr-3
586	III	363833	T	C	upstream_gene_variant	MODIFIER	pll-1
586	III	773412	A	C	5_prime_UTR_variant	MODIFIER	cyn-6
586	III	1672390	A	C	upstream_gene_variant	MODIFIER	glb-30
586	III	2364156	C	A	missense_variant	MODERATE	srd-69
586	III	5215687	A	T	upstream_gene_variant	MODIFIER	ZC155.4
586	III	6189629	T	A	upstream_gene_variant	MODIFIER	C23G10.12
586	III	6420285	G	A	upstream_gene_variant	MODIFIER	atgl-1
586	III	9242770	G	T	upstream_gene_variant	MODIFIER	21ur-13121
586	III	9567532	C	T	upstream_gene_variant	MODIFIER	C48B4.9
586	III	9794351	A	C	upstream_gene_variant	MODIFIER	R10E11.5
586	III	10631182	G	A	synonymous_variant	LOW	Y39A1A.9
586	III	11833153	A	T	downstream_gene_variant	MODIFIER	rsp-8
586	III	11833160	G	T	downstream_gene_variant	MODIFIER	rsp-8
586	III	12482267	A	G	upstream_gene_variant	MODIFIER	arrd-16
586	III	13090231	T	C	upstream_gene_variant	MODIFIER	Y39E4B.13
586	IV	121428	A	T	upstream_gene_variant	MODIFIER	duo-2
586	IV	7769675	G	A	upstream_gene_variant	MODIFIER	swd-2.2
586	IV	9469086	G	C	upstream_gene_variant	MODIFIER	F38E11.6
586	IV	11465876	C	T	upstream_gene_variant	MODIFIER	C10C6.3
586	IV	14151404	C	T	upstream_gene_variant	MODIFIER	H12I19.116
586	IV	14465940	T	A	upstream_gene_variant	MODIFIER	21ur-11537
586	IV	14973632	C	T	upstream_gene_variant	MODIFIER	21ur-4210
586	V	1184886	G	T	3_prime_UTR_variant	MODIFIER	Y50D4A.4
586	V	2202019	G	A	upstream_gene_variant	MODIFIER	cyp-32B1
586	V	10816467	G	A	synonymous_variant	LOW	lig-1
586	V	11563049	T	A	upstream_gene_variant	MODIFIER	srx-87
586	V	11821842	G	A	synonymous_variant	LOW	pyc-1
586	V	15346701	A	C	3_prime_UTR_variant	MODIFIER	C29F3.3
586	V	17224017	G	A	upstream_gene_variant	MODIFIER	srh-109
586	V	17543000	T	C	upstream_gene_variant	MODIFIER	C18D4.6
586	V	17543003	A	G	upstream_gene_variant	MODIFIER	C18D4.6
[truncated: 1,435 more rows]

## Sheet: N2_indels
Line	CHROM	POS	REF	ALT	type	putative effect	Gene annotation
504	I	572805	GT	G	intron_variant	MODIFIER	grl-16
504	I	2624759	AT	A	upstream_gene_variant	MODIFIER	Y23H5A.9
504	I	3208726	AT	A	upstream_gene_variant	MODIFIER	fog-1
504	I	4130390	TAAAAATCG	T	upstream_gene_variant	MODIFIER	E01A2.2
504	I	12819873	CA	C	upstream_gene_variant	MODIFIER	Y18D10A.3
504	II	731973	C	CT	downstream_gene_variant	MODIFIER	C08G5.1
504	II	1923269	AT	A	upstream_gene_variant	MODIFIER	bath-6
504	II	12670115	T	TC	upstream_gene_variant	MODIFIER	Y38E10A.t3
504	III	8257490	AT	A	frameshift_variant	HIGH	F09G8.5
504	III	8257492	G	GTTTCAGA	frameshift_variant	HIGH	F09G8.5
504	IV	940917	AC	A	downstream_gene_variant	MODIFIER	lgc-30
504	IV	15781051	CT	C	upstream_gene_variant	MODIFIER	21ur-14518
504	X	594510	T	TA	upstream_gene_variant	MODIFIER	F13C5.10
504	X	2926753	G	GT	upstream_gene_variant	MODIFIER	hst-3.2
508	I	8865963	TTCTA	T	upstream_gene_variant	MODIFIER	ztf-26
508	I	10764217	C	CA	upstream_gene_variant	MODIFIER	daf-16
508	I	11107057	AT	A	intron_variant	MODIFIER	hmr-1
508	III	5440636	T	TA	upstream_gene_variant	MODIFIER	W03A5.6
508	IV	2189730	G	GT	upstream_gene_variant	MODIFIER	Y71G10AR.5
508	IV	2308712	C	CGT	upstream_gene_variant	MODIFIER	mksr-2
508	IV	3756070	AT	A	upstream_gene_variant	MODIFIER	ugt-45
508	IV	6925078	GAT	G	frameshift_variant	HIGH	T22D1.1
508	V	1675374	CTAGTTAA	C	frameshift_variant	HIGH	srw-96
508	V	5635439	TAAA	T	upstream_gene_variant	MODIFIER	acy-4
508	V	15850567	G	GGTGGGAA	5_prime_UTR_variant	MODIFIER	srh-147
508	X	5087643	C	CA	upstream_gene_variant	MODIFIER	ets-5
508	X	10769118	G	GT	upstream_gene_variant	MODIFIER	sma-9
508	X	11486908	T	TTGCA	upstream_gene_variant	MODIFIER	spp-9
508	X	14640048	G	GA	upstream_gene_variant	MODIFIER	F54E4.3
522	I	1857521	GGTAGGCT	G	intron_variant	MODIFIER	M01D7.1
522	II	2549655	T	TAG	upstream_gene_variant	MODIFIER	K02F6.1
522	II	6826506	TATGGCCAC	T	upstream_gene_variant	MODIFIER	F31E8.14
522	II	14996586	AGAAGTCCTCTC	A	downstream_gene_variant	MODIFIER	Y53F4B.43
522	III	11244411	AT	A	upstream_gene_variant	MODIFIER	rsks-1
522	IV	13248481	GTA	G	frameshift_variant	HIGH	JC8.7
522	IV	14492557	A	AT	upstream_gene_variant	MODIFIER	21ur-10685
522	IV	14889362	GCT	G	upstream_gene_variant	MODIFIER	21ur-9455
522	IV	15052873	G	GTA	upstream_gene_variant	MODIFIER	21ur-6781
522	IV	16078805	AT	A	upstream_gene_variant	MODIFIER	21ur-12613
522	IV	16786722	GA	G	upstream_gene_variant	MODIFIER	21ur-13365
522	IV	16811553	G	GT	upstream_gene_variant	MODIFIER	21ur-6215
522	IV	17259538	GGATATTATT	G	upstream_gene_variant	MODIFIER	ZK550.5
522	V	5357392	G	GA	upstream_gene_variant	MODIFIER	T09D3.10
522	X	3940281	TGAAA	T	3_prime_UTR_variant	MODIFIER	T19D2.2
522	X	3940287	T	TG	3_prime_UTR_variant	MODIFIER	T19D2.2
537	I	8666569	GA	G	upstream_gene_variant	MODIFIER	syp-3
537	I	10755094	G	GAAAA	upstream_gene_variant	MODIFIER	H36N01.1
537	II	2106971	T	TTA	downstream_gene_variant	MODIFIER	math-42
537	II	5722130	T	TA	3_prime_UTR_variant	MODIFIER	rab-3
537	II	7106032	A	AT	upstream_gene_variant	MODIFIER	mmaa-1
537	III	468237	TA	T	upstream_gene_variant	MODIFIER	Y55B1BR.6
537	IV	835890	TGA	T	frameshift_variant	HIGH	Y55F3BR.6
537	IV	1381141	AT	A	upstream_gene_variant	MODIFIER	F58F6.3
537	IV	1964729	A	AT	upstream_gene_variant	MODIFIER	Y48A5A.1
537	V	2926421	GA	G	upstream_gene_variant	MODIFIER	srh-38
537	V	3058505	G	GT	downstream_gene_variant	MODIFIER	C50H11.8
537	V	16539675	C	CAT	upstream_gene_variant	MODIFIER	Y32B12B.2
537	V	16539677	TGCTGAAAG	T	upstream_gene_variant	MODIFIER	Y32B12B.2
537	V	17229147	C	CAAA	upstream_gene_variant	MODIFIER	srh-112
537	V	19172614	CGAGGAAACT	C	upstream_gene_variant	MODIFIER	hot-2
537	V	19172703	G	GA	upstream_gene_variant	MODIFIER	hot-2
537	V	19488100	A	AAT	upstream_gene_variant	MODIFIER	Y43F8B.7
537	X	16392575	ATGAAT	A	upstream_gene_variant	MODIFIER	let-2
547	I	3616102	GA	G	upstream_gene_variant	MODIFIER	Y47G6A.32
547	I	6670407	T	TTTTTTTTC	5_prime_UTR_variant	MODIFIER	ZC581.9
547	I	6670409	T	TTTTTTTTCC	upstream_gene_variant	MODIFIER	ZC581.9
547	I	11922841	C	CT	downstream_gene_variant	MODIFIER	wve-1
547	I	14957280	TA	T	upstream_gene_variant	MODIFIER	fbxb-70
547	III	1056262	CA	C	upstream_gene_variant	MODIFIER	BE0003N10.5
547	III	2568378	A	AT	upstream_gene_variant	MODIFIER	Y54F10AM.11
547	III	9705400	ACTCT	A	upstream_gene_variant	MODIFIER	tlk-1
547	IV	3936998	GA	G	upstream_gene_variant	MODIFIER	clec-71
547	IV	13315205	CATTTCA	C	upstream_gene_variant	MODIFIER	fat-1
547	X	2426483	TGG	T	upstream_gene_variant	MODIFIER	T07D1.11
547	X	2426489	GCATACCA	G	upstream_gene_variant	MODIFIER	mir-81
547	X	2426498	TCGGCGTACAAAA	T	upstream_gene_variant	MODIFIER	mir-81
547	X	13184918	A	AT	downstream_gene_variant	MODIFIER	21ur-13312
550	I	426078	G	GCATT	downstream_gene_variant	MODIFIER	C07F11.2
550	I	10333269	TTCACAATGTTTTTTC	T	upstream_gene_variant	MODIFIER	ZC434.4
550	III	4213744	GAAA	G	downstream_gene_variant	MODIFIER	mpk-1
550	V	6663828	T	TGTTAGACAGCAGGGC	upstream_gene_variant	MODIFIER	T10H9.10
550	X	1827526	GT	G	upstream_gene_variant	MODIFIER	C14E2.5
550	X	12506388	TCATC	T	frameshift_variant	HIGH	scd-1
550	X	13989162	G	GTA	upstream_gene_variant	MODIFIER	C31E10.1
587	I	6579	AT	A	upstream_gene_variant	MODIFIER	Y74C9A.6
587	I	11157368	A	AT	upstream_gene_variant	MODIFIER	clec-98
587	II	3029764	GTA	G	upstream_gene_variant	MODIFIER	B0454.6
587	II	7834766	AC	A	upstream_gene_variant	MODIFIER	T09A5.21
587	II	7834769	ATCTTAG	A	upstream_gene_variant	MODIFIER	T09A5.21
587	II	11535580	T	TTC	upstream_gene_variant	MODIFIER	mdt-8
587	III	5213774	CT	C	upstream_gene_variant	MODIFIER	syx-16
587	IV	53829	AT	A	upstream_gene_variant	MODIFIER	frm-5.1
587	IV	8494059	T	TG	frameshift_variant	HIGH	sru-7
587	IV	8494061	C	CAA	frameshift_variant	HIGH	sru-7
587	IV	9406368	AT	A	upstream_gene_variant	MODIFIER	F56D5.4
587	IV	10611172	G	GA	upstream_gene_variant	MODIFIER	ptr-14
587	V	20323860	TGGA	T	conservative_inframe_deletion	MODERATE	Y113G7C.1
587	X	13068915	G	GT	upstream_gene_variant	MODIFIER	cpx-2
587	X	15225529	A	AG	upstream_gene_variant	MODIFIER	H03A11.10
CB505	I	834423	A	ACTTAGGCTTAGG	splice_region_variant&non_coding_transcript_exon_variant	LOW	ZC123.6
CB505	I	3487922	AC	A	downstream_gene_variant	MODIFIER	crn-1
CB505	II	6427832	C	CT	upstream_gene_variant	MODIFIER	K03H9.1
pLeu58	III	1720169	GTCAAA	G	frameshift_variant	HIGH	Y22D7AR.12
pAsn17	IV	7462974	TCACTA	T	frameshift_variant&splice_acceptor_variant&splice_region_variant&intron_variant	HIGH	F13B6.3
CB505	IV	9339696	CA	C	3_prime_UTR_variant	MODIFIER	vps-26
CB505	IV	16540425	TA	T	upstream_gene_variant	MODIFIER	21ur-11339
CB505	X	378115	C	CTATATATA	downstream_gene_variant	MODIFIER	nrde-3
CB505	X	15978059	CA	C	intron_variant	MODIFIER	C09G1.2
CB512	I	714440	G	GT	upstream_gene_variant	MODIFIER	hgap-1
CB512	I	1859607	G	GT	downstream_gene_variant	MODIFIER	scm-1
CB512	I	8555019	GT	G	intron_variant	MODIFIER	gon-2
CB512	I	14118404	AT	A	3_prime_UTR_variant	MODIFIER	Y63D3A.8
CB512	I	14578816	A	AT	intron_variant	MODIFIER	Y105E8A.24
CB512	II	9571153	G	GGAT	splice_region_variant&non_coding_transcript_exon_variant	LOW	F35H8.11
pIle14	II	11682294	G	GA	frameshift_variant	HIGH	C47D12.4
CB512	III	1549643	TA	T	downstream_gene_variant	MODIFIER	Y67D2.11
pIle55	IV	1750549	CA	C	frameshift_variant	HIGH	Y41D4A.4
CB512	IV	7009698	T	TAAAACCA	upstream_gene_variant	MODIFIER	21ur-14807
CB512	IV	7009699	T	TTAAAAAACC	upstream_gene_variant	MODIFIER	21ur-14807
CB512	IV	7009701	T	TTTCA	upstream_gene_variant	MODIFIER	21ur-14807
pAsp13	IV	9978220	A	AT	frameshift_variant&stop_gained	HIGH	dhp-2
CB512	IV	16378606	CA	C	upstream_gene_variant	MODIFIER	21ur-2018
CB512	V	5573024	TA	T	upstream_gene_variant	MODIFIER	glb-6
CB512	V	11175481	TA	T	upstream_gene_variant	MODIFIER	21ur-12218
CB512	V	16380222	CT	C	upstream_gene_variant	MODIFIER	F13A7.1
CB512	V	16394640	CA	C	upstream_gene_variant	MODIFIER	skr-11
CB512	V	17964400	G	GA	upstream_gene_variant	MODIFIER	gck-3
CB512	V	17964408	C	CA	upstream_gene_variant	MODIFIER	gck-3
CB512	X	4113094	AT	A	upstream_gene_variant	MODIFIER	F09F9.13
CB513	III	1493434	CA	C	upstream_gene_variant	MODIFIER	M01G5.1
CB513	IV	1387490	GA	G	upstream_gene_variant	MODIFIER	Y104H12A.t2
CB513	IV	4058427	CTG	C	upstream_gene_variant	MODIFIER	W03D2.13
CB513	IV	4142187	AGCTTAGGCCAAG	A	upstream_gene_variant	MODIFIER	F49F1.9
CB513	IV	15248999	GA	G	upstream_gene_variant	MODIFIER	21ur-6174
CB513	IV	15905643	GT	G	upstream_gene_variant	MODIFIER	Y105C5B.5
pLeu38	X	695228	AT	A	frameshift_variant	HIGH	ncam-1
pPhe15	X	6150440	TA	T	frameshift_variant	HIGH	tag-275
CB513	X	7324196	C	CA	upstream_gene_variant	MODIFIER	spp-5
CB513	X	15514548	A	AC	upstream_gene_variant	MODIFIER	H30A04.6
CB520	I	68107	G	GT	upstream_gene_variant	MODIFIER	Y48G1C.5
CB520	I	8254039	C	CT	upstream_gene_variant	MODIFIER	ceh-8
CB520	I	9954870	CTGG	C	splice_acceptor_variant&splice_region_variant&intron_variant	HIGH	T24D1.2
CB520	I	12412236	GA	G	upstream_gene_variant	MODIFIER	E03H4.5
CB520	I	14609619	GCGGATATTTTTT	G	intergenic_region	MODIFIER	Y105E8A.25-Y105E8B.11
CB520	II	2789508	CA	C	upstream_gene_variant	MODIFIER	F08D12.12
CB520	IV	13203108	GTATTTTTCGC	G	upstream_gene_variant	MODIFIER	ced-3
pVal27	V	2708434	A	AATCAGGTACTTGGACACGTCAACAATCAGGT	frameshift_variant&stop_gained	HIGH	C24B9.3
CB520	V	3714720	TC	T	downstream_gene_variant	MODIFIER	lin-40
CB520	V	4063586	ATAAAAAAATT	A	upstream_gene_variant	MODIFIER	C49G7.1
CB520	V	5437080	TA	T	upstream_gene_variant	MODIFIER	F08F3.8
CB520	V	8108450	AT	A	upstream_gene_variant	MODIFIER	myo-5
CB520	V	8924268	TC	T	upstream_gene_variant	MODIFIER	H14N18.5
CB520	V	17875168	A	AT	upstream_gene_variant	MODIFIER	csn-1
CB520	X	3692616	GA	G	upstream_gene_variant	MODIFIER	tag-278
pLys21	X	3718293	CA	C	frameshift_variant	HIGH	C01C4.2
CB520	X	9994124	AAT	A	splice_region_variant&intron_variant	LOW	grk-1
CB520	X	9994127	GGCAAA	G	splice_donor_variant&splice_region_variant&intron_variant	HIGH	grk-1
CB520	X	16634167	AT	A	upstream_gene_variant	MODIFIER	C06G1.14
pAsp28	I	1843567	GACCGTCAGGATCGCGATTA	G	frameshift_variant	HIGH	nlp-12
CB523	I	2971381	A	AT	upstream_gene_variant	MODIFIER	Y71F9AR.9
CB523	III	918310	G	GA	upstream_gene_variant	MODIFIER	F23H11.6
CB523	III	11487727	C	CT	upstream_gene_variant	MODIFIER	fbxa-220
CB523	III	11624353	C	CA	upstream_gene_variant	MODIFIER	gly-8
CB523	IV	11556237	CTA	C	upstream_gene_variant	MODIFIER	col-128
CB523	V	916556	G	GCAAGGTTTTT	upstream_gene_variant	MODIFIER	H24K24.2
CB523	V	3727248	CA	C	upstream_gene_variant	MODIFIER	linc-136
CB523	V	8947148	AC	A	upstream_gene_variant	MODIFIER	T19A5.3
CB523	V	14278081	TTTCA	T	upstream_gene_variant	MODIFIER	F40G12.9
CB523	X	352696	AAAAAAACGCG	A	upstream_gene_variant	MODIFIER	C04E7.7
CB523	X	14167170	ATAATATTTATGCACGTT	A	splice_region_variant&intron_variant	LOW	sym-4
pHis86	II	2134360	AGT	A	frameshift_variant	HIGH	hpo-7
CB524	II	5504257	T	TA	upstream_gene_variant	MODIFIER	F12A10.8
CB524	III	4262691	AACACGGAAGTTGAGAAATT	A	downstream_gene_variant	MODIFIER	T08A11.2
CB524	III	6859627	TC	T	upstream_gene_variant	MODIFIER	zak-1
CB524	III	7709583	AAT	A	upstream_gene_variant	MODIFIER	lin-13
pPhe39	IV	11469623	TAGAGAACCA	T	disruptive_inframe_deletion	MODERATE	C10C6.13
pPro17	IV	13909165	TG	T	frameshift_variant	HIGH	Y37A1A.2
CB524	IV	14408385	G	GT	upstream_gene_variant	MODIFIER	21ur-9154
CB524	V	9272497	GA	G	upstream_gene_variant	MODIFIER	ZK682.9
CB524	V	13868840	CT	C	upstream_gene_variant	MODIFIER	F09F3.16
pAsn20	X	14587595	AATGGAGCATTG	A	frameshift_variant	HIGH	C44H4.4
CB526	I	1988691	TA	T	downstream_gene_variant	MODIFIER	gap-3
CB526	I	3401992	GGTGGTGT	G	upstream_gene_variant	MODIFIER	K03E5.7
CB526	II	10216511	CTAAT	C	upstream_gene_variant	MODIFIER	ref-1
CB526	III	4196878	G	GT	upstream_gene_variant	MODIFIER	asd-1
CB526	III	7557015	T	TGA	intron_variant	MODIFIER	ceh-13
CB526	III	11329865	GCCTCGTC	G	upstream_gene_variant	MODIFIER	T28D6.5
CB526	IV	6541646	AGCATTCTG	A	upstream_gene_variant	MODIFIER	C01G5.25
CB526	IV	17448868	G	GT	upstream_gene_variant	MODIFIER	21ur-15097
CB526	V	18272426	AT	A	upstream_gene_variant	MODIFIER	fbxa-213
CB526	X	702234	G	GT	upstream_gene_variant	MODIFIER	F02G3.6
CB526	X	4529819	T	TA	upstream_gene_variant	MODIFIER	21ur-11723
CB526	X	4824080	A	AT	upstream_gene_variant	MODIFIER	R08E3.1
CB531	I	863468	C	CA	intron_variant	MODIFIER	Y95B8A.8
CB531	I	911835	CA	C	upstream_gene_variant	MODIFIER	Y95B8A.16
CB531	I	2095270	T	TG	upstream_gene_variant	MODIFIER	iglr-3
CB531	I	7810678	GTGATTTACAATTTTGGCAAAA	G	upstream_gene_variant	MODIFIER	21ur-12756
CB531	I	10355304	GA	G	upstream_gene_variant	MODIFIER	ZC434.9
CB531	II	4224651	TTATGGAGAAA	T	upstream_gene_variant	MODIFIER	C16A11.4
pGly24	II	8763611	AAGACC	A	frameshift_variant	HIGH	pah-1
CB531	II	14364102	GT	G	upstream_gene_variant	MODIFIER	imb-2
CB531	IV	2166990	AATTTTTTT	A	upstream_gene_variant	MODIFIER	C54E4.4
CB531	IV	4613445	CA	C	upstream_gene_variant	MODIFIER	col-110
CB531	IV	5221595	CTCATCCTTCTTG	C	upstream_gene_variant	MODIFIER	21ur-7478
CB531	V	18178032	T	TTC	upstream_gene_variant	MODIFIER	C31G12.14
CB531	X	2878736	CAGAAAACGGCT	C	downstream_gene_variant	MODIFIER	21ur-15146
CB531	X	6321493	G	GT	upstream_gene_variant	MODIFIER	T10E10.10
CB531	X	11796515	AT	A	upstream_gene_variant	MODIFIER	C34E11.9
CB531	X	11905105	GT	G	upstream_gene_variant	MODIFIER	Y62H9A.10
CB531	X	16003006	TC	T	upstream_gene_variant	MODIFIER	T22E6.1
CB532	I	937705	TCC	T	upstream_gene_variant	MODIFIER	Y95B8A.2
CB532	I	1224612	AT	A	intron_variant	MODIFIER	herc-1
CB532	I	2149426	C	CT	upstream_gene_variant	MODIFIER	Y37E3.25
CB532	II	1350369	GA	G	upstream_gene_variant	MODIFIER	F56D12.11
CB532	II	4235883	CTTTGG	C	upstream_gene_variant	MODIFIER	C16A11.2
CB532	II	13598372	TCCGGAACATCGGCAAATTG	T	upstream_gene_variant	MODIFIER	clec-146
CB532	III	3966708	T	TA	upstream_gene_variant	MODIFIER	R10E9.2
CB532	III	4264221	T	TA	upstream_gene_variant	MODIFIER	T08A11.1
CB532	IV	5624615	C	CA	upstream_gene_variant	MODIFIER	srsx-16
CB532	IV	8318293	C	CT	upstream_gene_variant	MODIFIER	F35H10.16
pLys33	IV	10049367	CAAAAAAG	C	frameshift_variant	HIGH	T04B2.3
CB532	IV	10431735	CAG	C	upstream_gene_variant	MODIFIER	F13B12.2
CB532	V	312322	TAA	T	upstream_gene_variant	MODIFIER	phf-10
CB532	V	10544172	GA	G	downstream_gene_variant	MODIFIER	F25D1.8
CB532	V	20228104	A	ATGGCCAATTTCCCAAAAT	upstream_gene_variant	MODIFIER	Y113G7B.26
CB532	X	15636141	C	CT	upstream_gene_variant	MODIFIER	K09E9.8
CB536	I	803224	T	TCC	upstream_gene_variant	MODIFIER	Y73A3A.2
pMet37	I	8418605	A	AGGG	disruptive_inframe_insertion	MODERATE	sin-3
CB536	I	11687011	C	CA	upstream_gene_variant	MODIFIER	scrm-4
CB536	I	12913486	A	AT	upstream_gene_variant	MODIFIER	Y18D10A.27
CB536	I	13365439	G	GT	downstream_gene_variant	MODIFIER	Y40B1A.5
CB536	II	5160020	GA	G	splice_region_variant&intron_variant	LOW	C27D6.11
CB536	III	5145835	CTCA	C	downstream_gene_variant	MODIFIER	21ur-15343
CB536	III	12118646	TACTCAAATGAGCATGTGTC	T	upstream_gene_variant	MODIFIER	lron-12
CB536	III	12252243	C	CCCACG	upstream_gene_variant	MODIFIER	tim-1
CB536	III	12252246	T	TTGTCCGG	upstream_gene_variant	MODIFIER	tim-1
CB536	III	13730302	ACACTACATGGGGTGG	A	upstream_gene_variant	MODIFIER	mir-4814
pLys77	V	16142792	CT	C	frameshift_variant	HIGH	fbxa-88
CB536	X	550539	A	AT	downstream_gene_variant	MODIFIER	F57C12.6
CB536	X	17369689	A	AG	upstream_gene_variant	MODIFIER	F10D7.2
CB540	II	12241105	C	CA	upstream_gene_variant	MODIFIER	Y57A10A.24
CB540	IV	441241	ACGGCAAATT	A	upstream_gene_variant	MODIFIER	hum-8
pThr36	IV	1567630	ACAGTGGCAACCACC	A	frameshift_variant	HIGH	Y41D4B.15
pIle36	IV	1567648	ATTGCGACGAAATCTTTCGAATTTCTCAGTTTC	A	frameshift_variant	HIGH	Y41D4B.15
CB540	IV	2223652	TCGATTTTCCC	T	downstream_gene_variant	MODIFIER	T04C4.2
CB540	IV	2804636	ATCC	A	upstream_gene_variant	MODIFIER	Y54G2A.65
CB540	IV	12630511	GA	G	intron_variant	MODIFIER	ark-1
CB540	IV	14064958	G	GTA	upstream_gene_variant	MODIFIER	Y37A1B.4
CB540	IV	15923663	GT	G	upstream_gene_variant	MODIFIER	Y105C5B.7
CB540	V	3387953	GAATTTTCA	G	upstream_gene_variant	MODIFIER	T20D4.13
pThr25	V	15181451	GAACC	G	frameshift_variant	HIGH	T09F5.10
CB540	X	7817326	TAAATTC	T	intron_variant	MODIFIER	sek-1
CB540	X	11438199	G	GT	upstream_gene_variant	MODIFIER	hum-4
CB540	X	14573672	G	GT	upstream_gene_variant	MODIFIER	let-4
CB541	I	13204137	GT	G	upstream_gene_variant	MODIFIER	clec-110
CB541	II	637065	AT	A	downstream_gene_variant	MODIFIER	K07E8.6
CB541	II	1075966	CT	C	upstream_gene_variant	MODIFIER	linc-13
CB541	III	5035091	CTGT	C	upstream_gene_variant	MODIFIER	R144.15
pMet54	III	10848445	AT	A	frameshift_variant	HIGH	fbxb-85
CB541	IV	3508700	C	CA	upstream_gene_variant	MODIFIER	C09G12.18
CB541	IV	3508709	T	TGCA	upstream_gene_variant	MODIFIER	C09G12.18
CB541	IV	10086721	A	AT	upstream_gene_variant	MODIFIER	W01B6.8
CB541	V	15370539	GA	G	upstream_gene_variant	MODIFIER	srh-107
CB541	X	751107	TTG	T	downstream_gene_variant	MODIFIER	C02H7.4
CB541	X	2673542	A	AC	5_prime_UTR_variant	MODIFIER	ser-7
CB541	X	11426419	A	AT	upstream_gene_variant	MODIFIER	hum-4
CB542	I	4100241	G	GT	upstream_gene_variant	MODIFIER	acd-1
CB542	I	14397252	T	TC	downstream_gene_variant	MODIFIER	eat-18
CB542	II	3358985	TTAA	T	upstream_gene_variant	MODIFIER	F14D2.2
CB542	II	11464643	G	GGT	upstream_gene_variant	MODIFIER	aars-1
CB542	II	14069788	TA	T	downstream_gene_variant	MODIFIER	lem-2
CB542	IV	1473991	T	TAA	downstream_gene_variant	MODIFIER	Y77E11A.t3
CB542	IV	17017145	AT	A	upstream_gene_variant	MODIFIER	21ur-10373
CB542	V	577768	TA	T	upstream_gene_variant	MODIFIER	C14C6.13
CB542	X	1544264	A	AG	upstream_gene_variant	MODIFIER	K06A9.1
CB542	X	9144525	GT	G	3_prime_UTR_variant	MODIFIER	B0563.6
pLeu63	X	11282581	C	CA	frameshift_variant	HIGH	F38B2.3
CB543	II	4348145	AT	A	upstream_gene_variant	MODIFIER	H20J04.9
CB543	III	2043571	TATTTTTTTGGTGGGGATTTTAA	T	intron_variant	MODIFIER	dpy-1
CB543	IV	3736604	TAAATCACAAAATTTA	T	splice_region_variant&intron_variant	LOW	nape-2
CB543	IV	5595161	TA	T	upstream_gene_variant	MODIFIER	21ur-9930
CB543	IV	11664552	AT	A	upstream_gene_variant	MODIFIER	ZK809.9
CB543	IV	14366488	CT	C	upstream_gene_variant	MODIFIER	21ur-8888
CB543	V	4086265	T	TA	upstream_gene_variant	MODIFIER	F38H12.5
pArg15	V	6130534	CAGAAGGTTCAGATTGTCCGAATGTGTTGTCAGCGCG	C	conservative_inframe_deletion	MODERATE	ttn-1
pAsn65	V	12136376	C	CTTTT	frameshift_variant	HIGH	C27A7.1
pAsn65	V	12136378	CA	C	frameshift_variant	HIGH	C27A7.1
CB543	V	15637992	CA	C	upstream_gene_variant	MODIFIER	C55A1.15
CB543	V	16803452	C	CA	downstream_gene_variant	MODIFIER	ctps-1
CB543	V	18924377	G	GAAA	upstream_gene_variant	MODIFIER	Y80D3A.14
CB543	V	18924381	T	TTTTTTTTCCCCAGAAA	upstream_gene_variant	MODIFIER	Y80D3A.14
CB543	V	20491113	CAAAAATTTGAAAACTTCA	C	upstream_gene_variant	MODIFIER	srbc-78
CB543	X	15319167	G	GA	upstream_gene_variant	MODIFIER	Y15E3A.10
CB543	X	17114909	TA	T	upstream_gene_variant	MODIFIER	K09E3.5
CB543	X	17616823	A	AT	upstream_gene_variant	MODIFIER	ncs-7
CB544	I	2304881	G	GA	upstream_gene_variant	MODIFIER	tpxl-1
CB544	I	2472274	G	GA	3_prime_UTR_variant	MODIFIER	abtm-1
CB544	I	2616442	TAGGC	T	upstream_gene_variant	MODIFIER	Y23H5A.11
CB544	I	14349135	AT	A	intron_variant	MODIFIER	Y105E8A.2
CB544	III	5585620	C	CAA	upstream_gene_variant	MODIFIER	F56D2.5
CB544	III	10841743	TA	T	downstream_gene_variant	MODIFIER	R17.3
pGly87	III	12857089	AGC	A	frameshift_variant	HIGH	Y37D8A.6
CB544	IV	14561735	TCAGAG	T	upstream_gene_variant	MODIFIER	21ur-3862
CB544	IV	15600857	CA	C	upstream_gene_variant	MODIFIER	21ur-11993
CB544	V	18733949	TCTTAGGCTTAGG	T	upstream_gene_variant	MODIFIER	asp-19
CB544	V	20109791	A	AT	downstream_gene_variant	MODIFIER	sec-23
pLys12	X	4298367	CTTCCTT	C	conservative_inframe_deletion	MODERATE	C52B9.8
CB544	X	6949816	G	GCTT	upstream_gene_variant	MODIFIER	C16E9.13
CB544	X	9430454	C	CCTT	upstream_gene_variant	MODIFIER	B0272.3
CB544	X	16099196	G	GA	upstream_gene_variant	MODIFIER	ZK1073.2
CB545	I	3217041	AT	A	3_prime_UTR_variant	MODIFIER	fog-1
CB545	I	5455360	GAA	G	upstream_gene_variant	MODIFIER	F27C1.18
CB545	II	8263237	GT	G	upstream_gene_variant	MODIFIER	F35C11.6
CB545	III	3114117	AT	A	upstream_gene_variant	MODIFIER	Y53G8B.3
CB545	III	8725062	CT	C	3_prime_UTR_variant	MODIFIER	hipr-1
CB545	III	9778887	C	CT	3_prime_UTR_variant	MODIFIER	sqv-3
CB545	IV	368069	TA	T	upstream_gene_variant	MODIFIER	fln-1
CB545	IV	8730195	GT	G	3_prime_UTR_variant	MODIFIER	otub-3
pLys33	IV	10865631	CT	C	frameshift_variant	HIGH	F13E9.11
pLeu78	IV	11138347	CTAA	C	conservative_inframe_deletion	MODERATE	skih-2
CB545	IV	11598132	G	GT	upstream_gene_variant	MODIFIER	F40F11.3
CB545	V	2941968	CT	C	upstream_gene_variant	MODIFIER	srw-141
pAsn10	V	12411624	GTGCTCTTCGT	G	frameshift_variant	HIGH	cdr-7
CB545	V	13336958	AATT	A	upstream_gene_variant	MODIFIER	nhr-168
CB545	X	14071529	G	GT	upstream_gene_variant	MODIFIER	lgc-21
CB546	I	1165615	C	CA	upstream_gene_variant	MODIFIER	haf-6
CB546	I	4033212	AT	A	upstream_gene_variant	MODIFIER	unc-73
CB546	I	6737373	G	GT	splice_region_variant&intron_variant	LOW	dhod-1
CB546	I	10833244	ATTTCAAAATTGCATAATTTC	A	upstream_gene_variant	MODIFIER	C35E7.3
CB546	I	14619119	A	AT	downstream_gene_variant	MODIFIER	Y105E8B.11
CB546	II	2874813	TA	T	upstream_gene_variant	MODIFIER	Y110A2AL.10
CB546	II	13187507	GT	G	upstream_gene_variant	MODIFIER	mir-4933
pMet1d	IV	11253993	CAAG	C	start_lost&conservative_inframe_deletion	HIGH	C05C12.1
CB546	IV	15176806	AT	A	upstream_gene_variant	MODIFIER	Y40H7A.4
CB546	IV	15952881	TTTTTTTCAATTTTTTCCAGA	T	upstream_gene_variant	MODIFIER	21ur-8174
CB546	V	8644608	G	GT	upstream_gene_variant	MODIFIER	F28A12.3
CB546	V	14190793	GT	G	upstream_gene_variant	MODIFIER	atfs-1
pTyr22	V	15138540	T	TA	frameshift_variant	HIGH	K08F9.1
pGlu77	V	16545614	TGGA	T	disruptive_inframe_deletion	MODERATE	Y32B12B.2
pGlu5f	X	15773540	AG	A	frameshift_variant	HIGH	Y7A5A.t1
CB551	I	4598214	TA	T	3_prime_UTR_variant	MODIFIER	nrd-1
pSer7_	I	7282846	AAATAAG	A	disruptive_inframe_deletion	MODERATE	rde-2
CB551	II	5027328	CTTTATTTT	C	downstream_gene_variant	MODIFIER	F33G12.2
CB551	II	8836148	A	AT	5_prime_UTR_variant	MODIFIER	F46C5.4
CB551	IV	8500046	A	AT	3_prime_UTR_variant	MODIFIER	mesp-1
CB551	IV	16729562	TG	T	upstream_gene_variant	MODIFIER	21ur-11161
CB551	V	16557316	AT	A	upstream_gene_variant	MODIFIER	Y32B12B.4
CB551	V	18378343	CA	C	upstream_gene_variant	MODIFIER	Y51A2B.t2
CB551	V	19690586	A	AT	downstream_gene_variant	MODIFIER	Y43F8C.13
CB551	X	4928693	AATTCCGC	A	upstream_gene_variant	MODIFIER	mct-4
CB551	X	5289541	A	ATTTTTTTTTTTATTTTT	3_prime_UTR_variant	MODIFIER	vps-41
pThr85	X	11674765	AACTC	A	frameshift_variant	HIGH	T04F8.9
CB553	I	2164654	G	GA	intron_variant	MODIFIER	afd-1
CB553	II	2299228	TCCGGCAAAA	T	upstream_gene_variant	MODIFIER	fbxc-25
CB553	III	10646	GT	G	splice_region_variant&intron_variant	LOW	npr-30
CB553	III	2018456	TTTCGAAAAAAAAAA	T	upstream_gene_variant	MODIFIER	ckr-2
CB553	III	4837511	G	GCT	upstream_gene_variant	MODIFIER	acbp-7
CB553	III	9988978	TTA	T	upstream_gene_variant	MODIFIER	R10E12.8
CB553	III	12134560	GT	G	upstream_gene_variant	MODIFIER	Y75B8A.6
CB553	III	13413133	GT	G	upstream_gene_variant	MODIFIER	F45G2.t1
CB553	IV	5049046	CA	C	upstream_gene_variant	MODIFIER	hot-9
CB553	V	2920329	ACGCGCCGCACTGTACAGAAGG	A	upstream_gene_variant	MODIFIER	srj-51
CB553	V	3481816	ATAATTTTGC	A	splice_region_variant&intron_variant	LOW	lys-7
CB553	V	20284183	A	AC	upstream_gene_variant	MODIFIER	pqn-94
CB553	X	8976205	TA	T	upstream_gene_variant	MODIFIER	nmur-1
CB554	II	3458389	GGGAGC	G	upstream_gene_variant	MODIFIER	C16C8.19
CB554	II	3458395	T	TATCCCACAAGTCCCACAAAA	upstream_gene_variant	MODIFIER	C16C8.19
CB554	II	12027944	G	GA	upstream_gene_variant	MODIFIER	Y17G7B.24
CB554	II	13849843	ATTT	A	upstream_gene_variant	MODIFIER	F08G2.16
CB554	III	5424403	C	CT	upstream_gene_variant	MODIFIER	dnj-24
CB554	V	1931697	CA	C	downstream_gene_variant	MODIFIER	T06A1.5
CB554	V	3681845	GA	G	upstream_gene_variant	MODIFIER	W08A12.3
pArg17	V	8775129	A	ATTGG	frameshift_variant	HIGH	B0507.2
pArg17	V	8775130	CG	C	frameshift_variant	HIGH	B0507.2
CB554	V	10446110	GA	G	3_prime_UTR_variant	MODIFIER	pap-1
CB554	V	18558631	CAAG	C	upstream_gene_variant	MODIFIER	Y51A2D.8
CB554	X	11954820	ATAG	A	upstream_gene_variant	MODIFIER	T08D10.4
CB554	X	13797664	AT	A	upstream_gene_variant	MODIFIER	ZK1086.2
pThr67	I	10378877	CA	C	frameshift_variant	HIGH	hpo-35
CB565	I	13316131	TGCC	T	upstream_gene_variant	MODIFIER	pde-1
pSer50	II	2693389	G	GA	frameshift_variant	HIGH	set-11
CB565	II	3782211	GGCTCCAATTAGAAAAGGTTAGACGGCTGGAGCTCTATGA	G	upstream_gene_variant	MODIFIER	T24E12.11
CB565	II	4089310	TC	T	upstream_gene_variant	MODIFIER	R11F4.1
CB565	II	11343765	GA	G	splice_region_variant	LOW	B0491.5
CB565	II	12881037	TA	T	upstream_gene_variant	MODIFIER	gsy-1
CB565	III	7152913	G	GT	upstream_gene_variant	MODIFIER	ogt-1
CB565	III	11692767	A	AT	upstream_gene_variant	MODIFIER	Y41C4A.29
CB565	III	12403304	AGTACATATAATATAT	A	upstream_gene_variant	MODIFIER	Y49E10.t1
CB565	III	12656076	AT	A	downstream_gene_variant	MODIFIER	pqn-80
CB565	IV	2093186	TTTTTTTTTTG	T	upstream_gene_variant	MODIFIER	C23H5.4
CB565	IV	2100296	CT	C	upstream_gene_variant	MODIFIER	C23H5.11
pPhe7_	IV	2805881	GTTTGTGCTA	G	disruptive_inframe_deletion	MODERATE	Y54G2A.45
CB565	V	9921799	TCG	T	upstream_gene_variant	MODIFIER	C50H2.7
CB565	V	9921805	T	TTTTACTTTC	upstream_gene_variant	MODIFIER	C50H2.7
CB565	V	13494427	GT	G	upstream_gene_variant	MODIFIER	T10G3.3
CB565	X	14063041	GTGAT	G	upstream_gene_variant	MODIFIER	C33G3.13
pTyr74	X	16666899	CGTA	C	conservative_inframe_deletion	MODERATE	tag-343
CB567	I	2865355	TG	T	upstream_gene_variant	MODIFIER	Y71F9AL.21
CB567	I	6897507	G	GT	downstream_gene_variant	MODIFIER	C48B6.13
CB567	I	7179762	G	GT	upstream_gene_variant	MODIFIER	M05B5.7
pThr82	I	13552111	A	AGTC	disruptive_inframe_insertion	MODERATE	vars-2
pCys22	III	2807202	AATGTCTTCC	A	conservative_inframe_deletion	MODERATE	Y71H2AM.3
CB567	III	9531337	A	AT	downstream_gene_variant	MODIFIER	trpp-3
CB567	III	10288339	TA	T	3_prime_UTR_variant	MODIFIER	K10G9.2
CB567	IV	6807498	TA	T	upstream_gene_variant	MODIFIER	21ur-14926
CB567	IV	13526350	CT	C	upstream_gene_variant	MODIFIER	dcap-2
CB567	IV	13703982	C	CA	5_prime_UTR_variant	MODIFIER	tlp-1
pPhe34	X	5241097	AAAG	A	disruptive_inframe_deletion	MODERATE	mtm-5
CB574	I	1289310	CTAGGCCATAATTTTTT	C	downstream_gene_variant	MODIFIER	Y48G8AR.2
CB574	I	14991911	TCAATTTTCTCG	T	upstream_gene_variant	MODIFIER	tep-1
CB574	I	15054428	C	CTT	upstream_gene_variant	MODIFIER	F31C3.3
CB574	II	3446935	CT	C	upstream_gene_variant	MODIFIER	C16C8.22
CB574	II	5962494	C	CG	upstream_gene_variant	MODIFIER	B0034.12
CB574	II	14696251	CA	C	upstream_gene_variant	MODIFIER	K02B7.3
CB574	III	3467756	CA	C	3_prime_UTR_variant	MODIFIER	C34C12.4
CB574	III	9716407	ATT	A	splice_region_variant&intron_variant	LOW	ncx-7
CB574	III	10131138	TA	T	upstream_gene_variant	MODIFIER	ZK1128.10
CB574	IV	8224995	TA	T	upstream_gene_variant	MODIFIER	ocr-2
CB574	IV	12120843	CA	C	upstream_gene_variant	MODIFIER	M18.6
CB574	IV	12335742	CT	C	upstream_gene_variant	MODIFIER	ufd-1
CB574	IV	15420675	A	AT	upstream_gene_variant	MODIFIER	21ur-6163
pAsn12	V	16529380	AATCGGGCAGTTATGGAGCTTCAAGCTTCGATG	A	frameshift_variant	HIGH	F36D3.16
CB574	X	948930	GA	G	upstream_gene_variant	MODIFIER	sms-2
CB577	I	1068479	T	TAC	upstream_gene_variant	MODIFIER	vps-4
CB577	I	10468707	C	CA	upstream_gene_variant	MODIFIER	Y106G6H.13
pPro20	I	13841668	G	GTA	frameshift_variant	HIGH	W04A8.2
pPro20	I	13841670	CCT	C	frameshift_variant	HIGH	W04A8.2
CB577	II	10453971	GT	G	upstream_gene_variant	MODIFIER	ZK673.11
CB577	IV	587293	G	GA	splice_region_variant&intron_variant	LOW	C18H7.12
CB577	IV	2652945	G	GA	splice_region_variant&intron_variant	LOW	Y69A2AR.31
CB577	V	2721942	G	GA	splice_region_variant&intron_variant	LOW	srg-60
pAla12	V	9625917	T	TG	frameshift_variant	HIGH	T06E4.14
pArg13	V	9625923	A	ACC	frameshift_variant	HIGH	T06E4.14
pArg13	V	9625925	G	GC	frameshift_variant	HIGH	T06E4.14
CB577	V	19665139	T	TG	upstream_gene_variant	MODIFIER	Y43F8C.t5
CB577	X	13773143	G	GA	upstream_gene_variant	MODIFIER	nkb-3
CB578	I	2824575	C	CT	upstream_gene_variant	MODIFIER	W03D8.3
CB578	II	1033649	TA	T	3_prime_UTR_variant	MODIFIER	math-34
CB578	II	4304214	GA	G	downstream_gene_variant	MODIFIER	sco-1
CB578	II	4769177	TTTCTTTGAACA	T	upstream_gene_variant	MODIFIER	ttm-2
CB578	II	9586182	C	CA	upstream_gene_variant	MODIFIER	wee-1.1
pLeu12	II	10243198	A	AGATCTCCATTC	frameshift_variant	HIGH	nrde-2
CB578	III	7673859	A	AC	downstream_gene_variant	MODIFIER	C18H2.1
CB578	III	7999793	AG	A	upstream_gene_variant	MODIFIER	npr-17
CB578	III	12717498	AT	A	downstream_gene_variant	MODIFIER	hut-1
CB578	IV	600261	CA	C	splice_region_variant&intron_variant	LOW	srt-59
CB578	V	5082035	TA	T	3_prime_UTR_variant	MODIFIER	Y58A7A.4
CB578	V	7655066	AT	A	upstream_gene_variant	MODIFIER	srh-234
CB578	V	16121952	TA	T	upstream_gene_variant	MODIFIER	str-103
CB578	X	7763061	ATT	A	upstream_gene_variant	MODIFIER	miro-2
CB578	X	11452251	CT	C	upstream_gene_variant	MODIFIER	F48C5.3
CB578	X	16261410	TA	T	upstream_gene_variant	MODIFIER	21ur-12975
CB578	X	17527422	CT	C	3_prime_UTR_variant	MODIFIER	nhr-1
CB579	I	7708265	AATG	A	upstream_gene_variant	MODIFIER	lsy-22
CB579	I	10960627	CA	C	upstream_gene_variant	MODIFIER	Y95D11A.2
CB579	II	10932597	TAGTAAAGGTTTAAGCTGCACTAGCTGCTACC	T	downstream_gene_variant	MODIFIER	metr-1
CB579	III	1557098	AT	A	upstream_gene_variant	MODIFIER	Y67D2.6
CB579	III	11410083	AT	A	upstream_gene_variant	MODIFIER	Y47D3B.19
CB579	III	12737512	C	CA	intron_variant	MODIFIER	ssl-1
CB579	IV	1455544	C	CT	upstream_gene_variant	MODIFIER	Y77E11A.2
CB579	IV	6537991	CA	C	upstream_gene_variant	MODIFIER	C01G5.25
CB579	V	13558660	GA	G	upstream_gene_variant	MODIFIER	C56A3.6
CB579	X	6796658	CGAGGTA	C	upstream_gene_variant	MODIFIER	M03A8.3
pLeu29	I	12309096	AT	A	frameshift_variant	HIGH	oac-35
CB580	II	4334487	A	AT	upstream_gene_variant	MODIFIER	madf-3
CB580	II	6232359	G	GT	upstream_gene_variant	MODIFIER	C30B5.13
CB580	II	9733856	GT	G	upstream_gene_variant	MODIFIER	Y53C12B.8
CB580	II	11403439	TACCGCGCGGTAG	T	downstream_gene_variant	MODIFIER	C05D12.8
CB580	III	12093718	T	TA	intergenic_region	MODIFIER	nob-1-linc-161
CB580	IV	8456975	CT	C	upstream_gene_variant	MODIFIER	21ur-13958
CB580	V	18586941	GCTAGT	G	upstream_gene_variant	MODIFIER	Y51A2D.30
CB580	V	20052628	T	TC	downstream_gene_variant	MODIFIER	srh-233
CB580	X	5187005	ACTT	A	3_prime_UTR_variant	MODIFIER	zig-6
pAsn19	X	12442947	A	AGTTGTTACACAGTT	frameshift_variant	HIGH	T18D3.7
CB581	I	3528051	GACTTA	G	upstream_gene_variant	MODIFIER	Y47G6A.30
CB581	I	6009708	GA	G	upstream_gene_variant	MODIFIER	C06A5.12
CB581	I	12772211	C	CACAAACT	upstream_gene_variant	MODIFIER	B0019.2
CB581	II	5202373	G	GT	upstream_gene_variant	MODIFIER	ampd-1
CB581	II	11974173	CA	C	upstream_gene_variant	MODIFIER	acbp-6
CB581	II	13110993	ATTT	A	upstream_gene_variant	MODIFIER	rict-1
pAla31	II	13560687	GGCC	G	disruptive_inframe_deletion	MODERATE	Y48E1B.3
CB581	III	522595	A	AC	downstream_gene_variant	MODIFIER	T22F7.4
CB581	IV	10021262	C	CA	3_prime_UTR_variant	MODIFIER	ent-4
CB581	IV	14621511	AT	A	upstream_gene_variant	MODIFIER	21ur-4363
pGly68	V	2646283	AGGCGGCGGC	A	disruptive_inframe_deletion	MODERATE	W02H5.2
CB581	V	4208784	TTC	T	downstream_gene_variant	MODIFIER	H43I07.1
CB581	X	1224924	AT	A	upstream_gene_variant	MODIFIER	C46H3.2
CB581	X	4504298	CCGCGGGGCGAGGACCGCGA	C	5_prime_UTR_variant	MODIFIER	dgk-2
CB581	X	12759300	CTTTTTGATATTATTGTTTATAGTTGAAAATATT	C	upstream_gene_variant	MODIFIER	pgp-15
CB581	X	13462062	A	AC	downstream_gene_variant	MODIFIER	F02D10.2
CB581	X	15703770	T	TA	upstream_gene_variant	MODIFIER	nhr-48
CB581	X	16280144	TAGC	T	upstream_gene_variant	MODIFIER	F52E10.3
CB582	I	11145523	T	TTATACA	upstream_gene_variant	MODIFIER	ZK39.13
CB582	I	11421648	GA	G	upstream_gene_variant	MODIFIER	C27C7.7
pPro21	I	14312406	GC	G	frameshift_variant	HIGH	F49B2.3
CB582	III	6948774	G	GT	upstream_gene_variant	MODIFIER	abu-13
CB582	III	12540402	G	GA	splice_region_variant&intron_variant	LOW	aakg-1
CB582	IV	15730954	AAAAAAACGCG	A	upstream_gene_variant	MODIFIER	21ur-12308
CB582	V	19728539	T	TA	upstream_gene_variant	MODIFIER	Y116F11A.3
CB582	X	3646979	T	TA	upstream_gene_variant	MODIFIER	R11G1.6
CB582	X	6662947	GT	G	upstream_gene_variant	MODIFIER	C56E10.5
CB582	X	7454894	TA	T	upstream_gene_variant	MODIFIER	K08A8.22
CB582	X	14896223	G	GA	upstream_gene_variant	MODIFIER	lips-8
CB582	X	17221079	A	AT	upstream_gene_variant	MODIFIER	acdh-7
CB582	X	17683206	CA	C	upstream_gene_variant	MODIFIER	T23E7.6
CB584	I	6172547	C	CT	upstream_gene_variant	MODIFIER	T09B4.14
CB584	I	8287505	A	AT	downstream_gene_variant	MODIFIER	dma-1
CB584	II	10504425	AT	A	upstream_gene_variant	MODIFIER	pqn-47
CB584	II	11586122	TA	T	upstream_gene_variant	MODIFIER	F07A11.11
CB584	II	11678274	TAAAAATCG	T	upstream_gene_variant	MODIFIER	trr-1
CB584	V	2616365	C	CTTGTAGT	upstream_gene_variant	MODIFIER	W02H5.15
CB584	V	19379248	AT	A	upstream_gene_variant	MODIFIER	srw-84
CB584	V	20759357	TA	T	upstream_gene_variant	MODIFIER	F38A6.9
CB584	X	3803360	C	CTAA	upstream_gene_variant	MODIFIER	erp-1
CB585	I	13396610	TCTGA	T	upstream_gene_variant	MODIFIER	C01A2.2
CB585	II	4354083	AGTATATCTAAAGTACTGCTACAGTACCCATACG	A	upstream_gene_variant	MODIFIER	H20J04.1
CB585	II	5124336	CT	C	upstream_gene_variant	MODIFIER	F09C12.14
CB585	II	9610626	GATGGCAA	G	upstream_gene_variant	MODIFIER	T15H9.6
CB585	II	12219315	C	CT	upstream_gene_variant	MODIFIER	Y57A10A.37
CB585	II	13367698	GCCTA	G	upstream_gene_variant	MODIFIER	Y48C3A.20
CB585	III	2577656	A	AT	upstream_gene_variant	MODIFIER	Y54F10AR.1
CB585	III	11629025	TA	T	downstream_gene_variant	MODIFIER	gly-8
CB585	V	10535653	A	AT	upstream_gene_variant	MODIFIER	F25D1.2
CB585	X	3555810	T	TC	upstream_gene_variant	MODIFIER	rgs-7
CB585	X	6300119	GT	G	upstream_gene_variant	MODIFIER	T07H6.1
CB585	X	9358550	T	TA	intergenic_region	MODIFIER	flp-20-pkc-2
CB586	I	11582744	T	TA	splice_region_variant	LOW	spe-9
CB586	I	14234822	TCAG	T	upstream_gene_variant	MODIFIER	eya-1
CB586	I	14234826	TAGGA	T	upstream_gene_variant	MODIFIER	eya-1
CB586	II	4598080	A	AT	upstream_gene_variant	MODIFIER	ipla-1
CB586	II	12731838	G	GT	upstream_gene_variant	MODIFIER	Y46G5A.t1
CB586	II	14531100	GA	G	upstream_gene_variant	MODIFIER	F57C2.5
CB586	III	6189624	AG	A	upstream_gene_variant	MODIFIER	C23G10.12
CB586	III	11308697	GAAA	G	splice_region_variant&intron_variant	LOW	rab-35
CB586	IV	1216893	T	TA	downstream_gene_variant	MODIFIER	W09G12.10
CB586	IV	14973630	A	ATTTT	upstream_gene_variant	MODIFIER	21ur-4210
CB586	IV	14973636	AT	A	upstream_gene_variant	MODIFIER	21ur-4210
CB586	V	8001620	GT	G	upstream_gene_variant	MODIFIER	Y97E10AR.8
CB586	V	8530128	CT	C	upstream_gene_variant	MODIFIER	F45F2.15
pGlu64	V	10816185	AGAGGAG	A	conservative_inframe_deletion	MODERATE	lig-1
CB586	X	756381	G	GT	intron_variant	MODIFIER	aex-3
CB586	X	1698813	CT	C	upstream_gene_variant	MODIFIER	C36C9.4
CB586	X	10214298	TG	T	downstream_gene_variant	MODIFIER	F44A6.3
CB586	X	16978019	A	AAT	upstream_gene_variant	MODIFIER	F52G3.5
CB589	I	8285303	TTA	T	downstream_gene_variant	MODIFIER	dma-1
CB589	I	11280200	TGA	T	upstream_gene_variant	MODIFIER	F36D1.9
CB589	III	11968323	G	GA	downstream_gene_variant	MODIFIER	ung-1
pArg12	IV	1524929	AC	A	frameshift_variant	HIGH	K03H6.1
CB589	IV	2230610	GAATTTTATTATACT	G	upstream_gene_variant	MODIFIER	T04C4.2
CB589	IV	2448363	TAG	T	upstream_gene_variant	MODIFIER	C45G7.13
CB589	V	1236096	AT	A	upstream_gene_variant	MODIFIER	madd-2
CB589	X	15467102	TGTATAAATTCAAA	T	downstream_gene_variant	MODIFIER	21ur-13292
CB591	I	2741772	TTATGTC	T	upstream_gene_variant	MODIFIER	Y71F9B.22
CB591	I	2741781	A	AT	upstream_gene_variant	MODIFIER	Y71F9B.22
CB591	I	7961560	G	GT	upstream_gene_variant	MODIFIER	T22C1.8
CB591	II	12806410	CACGT	C	upstream_gene_variant	MODIFIER	Y46G5A.18
CB591	II	13667222	AT	A	upstream_gene_variant	MODIFIER	C31C9.7
CB591	III	2087718	TGTG	T	intron_variant	MODIFIER	cpt-3
CB591	III	4336705	TCTCTTGG	T	downstream_gene_variant	MODIFIER	21ur-14269
CB591	III	9133191	C	CTTT	upstream_gene_variant	MODIFIER	ZK512.13
CB591	IV	8932696	CT	C	upstream_gene_variant	MODIFIER	D1046.4
pThr90	IV	9654656	C	CA	frameshift_variant	HIGH	F58G6.7
CB591	IV	13762982	G	GA	upstream_gene_variant	MODIFIER	21ur-1516
CB591	IV	14111466	TTCC	T	upstream_gene_variant	MODIFIER	21ur-11316
CB591	X	4637792	AT	A	upstream_gene_variant	MODIFIER	C46C11.5
CB591	X	9543138	A	AT	upstream_gene_variant	MODIFIER	21ur-15476
CB591	X	9824280	AT	A	upstream_gene_variant	MODIFIER	dpy-22
CB593	I	4933380	G	GT	upstream_gene_variant	MODIFIER	dip-2
CB593	I	6354842	G	GA	upstream_gene_variant	MODIFIER	K04F10.3
CB593	I	13452385	GTAC	G	downstream_gene_variant	MODIFIER	spr-5
CB593	II	3119850	CA	C	upstream_gene_variant	MODIFIER	T10D4.17
CB593	II	3457877	C	CA	upstream_gene_variant	MODIFIER	C16C8.19
CB593	III	2392683	C	CT	upstream_gene_variant	MODIFIER	H14E04.4
CB593	III	4673321	C	CA	upstream_gene_variant	MODIFIER	T23F11.11
CB593	III	12620097	GAA	G	upstream_gene_variant	MODIFIER	Y111B2A.13
CB593	IV	4269482	ATG	A	upstream_gene_variant	MODIFIER	F36A4.3
CB593	IV	7958055	GTGAGTATTATT	G	splice_donor_variant&splice_region_variant&intron_variant	HIGH	csr-1
CB593	IV	10405613	CT	C	downstream_gene_variant	MODIFIER	R10H10.6
CB593	IV	12609296	GT	G	upstream_gene_variant	MODIFIER	Y55D9A.2
CB593	V	2741368	G	GT	upstream_gene_variant	MODIFIER	srg-56
CB593	V	19957567	TTATGTATATGTA	T	upstream_gene_variant	MODIFIER	srh-172
CB593	V	20097693	TA	T	upstream_gene_variant	MODIFIER	Y113G7A.15
CB594	I	5649426	T	TA	downstream_gene_variant	MODIFIER	col-53
CB594	I	6192530	CT	C	3_prime_UTR_variant	MODIFIER	T05E7.3
CB594	II	760763	TGGCTC	T	intron_variant	MODIFIER	C08G5.7
CB594	II	12007929	T	TA	upstream_gene_variant	MODIFIER	mcm-2
CB594	II	12169934	GGCTTAGGCTTAA	G	upstream_gene_variant	MODIFIER	rol-1
CB594	III	9420521	A	AT	upstream_gene_variant	MODIFIER	T26G10.9
CB594	III	11880213	G	GT	upstream_gene_variant	MODIFIER	Y56A3A.6
CB594	III	13136802	C	CT	downstream_gene_variant	MODIFIER	zig-8
CB594	IV	13600626	AT	A	upstream_gene_variant	MODIFIER	21ur-9860
CB594	V	3824156	C	CA	upstream_gene_variant	MODIFIER	H10D18.5
CB594	X	1967311	CA	C	upstream_gene_variant	MODIFIER	str-79
CB594	X	4144723	C	CA	upstream_gene_variant	MODIFIER	ZK470.4
CB594	X	6938865	T	TCAGTTCAACA	3_prime_UTR_variant	MODIFIER	C16E9.2
CB594	X	8130828	T	TCCC	upstream_gene_variant	MODIFIER	frpr-1
CB594	X	8130829	GA	G	upstream_gene_variant	MODIFIER	frpr-1
CB594	X	8130832	TA	T	upstream_gene_variant	MODIFIER	frpr-1
CB597	I	3976586	GTTTTAT	G	splice_region_variant&intron_variant	LOW	F28H1.4
CB597	II	3596259	A	AT	upstream_gene_variant	MODIFIER	srh-305
CB597	II	10771581	GA	G	intron_variant	MODIFIER	mpz-1
CB597	II	13829311	CCGAGCCCGGCAGCAGTGCAACGCCAGGACGACCCTTGGGAAGT	C	upstream_gene_variant	MODIFIER	his-25
CB597	III	13325077	GCTTACTTA	G	upstream_gene_variant	MODIFIER	F53A2.11
CB597	IV	207100	C	CA	upstream_gene_variant	MODIFIER	Y38C1AA.1
CB597	IV	14067827	AT	A	upstream_gene_variant	MODIFIER	lst-3
CB598	I	978988	AGCTTAGGCTTAGGCTTAG	A	upstream_gene_variant	MODIFIER	F54A5.4
CB598	I	1040657	G	GT	upstream_gene_variant	MODIFIER	Y34D9A.7
CB598	I	13486387	TTC	T	upstream_gene_variant	MODIFIER	Y48G10A.1
CB598	II	13636918	AT	A	3_prime_UTR_variant	MODIFIER	tag-10
CB598	III	1781809	AT	A	upstream_gene_variant	MODIFIER	Y39A3CL.4
CB598	III	8321346	GTCTCTCT	G	upstream_gene_variant	MODIFIER	sas-4
CB598	III	12866824	TTG	T	upstream_gene_variant	MODIFIER	Y37D8A.8
CB598	IV	13258045	CGTGGCCGTGAAAAAATTG	C	upstream_gene_variant	MODIFIER	JC8.16
CB598	IV	14385883	A	AG	upstream_gene_variant	MODIFIER	paqr-3
502	I	5279709	T	TG	upstream_gene_variant	MODIFIER	cln-3.2
502	I	10567331	AC	A	upstream_gene_variant	MODIFIER	rla-0
502	III	3205879	A	AT	intron_variant	MODIFIER	frm-8
502	III	4930529	TA	T	upstream_gene_variant	MODIFIER	set-2
502	III	5935100	TTACTACAACTGAATACTAC	T	upstream_gene_variant	MODIFIER	zmp-1
502	III	12499803	T	TA	frameshift_variant	HIGH	sql-1
502	IV	208270	ATTGG	A	upstream_gene_variant	MODIFIER	Y38C1AA.1
502	X	7440976	AT	A	upstream_gene_variant	MODIFIER	C01C10.2
516	I	2163500	A	AT	intron_variant	MODIFIER	afd-1
516	I	3026910	A	AT	downstream_gene_variant	MODIFIER	Y54E10BR.5
516	II	1884707	GAATTGAACTCTTTGCAGA	G	disruptive_inframe_deletion	MODERATE	math-6
516	III	9228813	TA	T	upstream_gene_variant	MODIFIER	rnr-1
516	IV	15519115	G	GGA	upstream_gene_variant	MODIFIER	Y73F8A.32
516	V	857346	A	ATC	frameshift_variant	HIGH	K09C6.t1
516	V	20005238	GA	G	upstream_gene_variant	MODIFIER	unc-51
516	X	10686617	A	AC	upstream_gene_variant	MODIFIER	F13E6.10
525	I	1025951	T	TC	downstream_gene_variant	MODIFIER	spd-1
525	I	4414260	C	CGCACAATGTACCCTGTAGCA	upstream_gene_variant	MODIFIER	T21E12.7
525	IV	10599652	CT	C	upstream_gene_variant	MODIFIER	R09H10.1
525	IV	12613947	CT	C	upstream_gene_variant	MODIFIER	efa-6
525	V	5731923	T	TA	upstream_gene_variant	MODIFIER	K09H11.5
525	V	10886289	GT	G	upstream_gene_variant	MODIFIER	F32D8.3
525	V	19214573	C	CAGAAAATTTTGTGAAT	upstream_gene_variant	MODIFIER	nhr-79
525	X	15754657	CTTG	C	conservative_inframe_deletion	MODERATE	wrt-4
529	I	734061	GAGGCAGGTAGGT	G	downstream_gene_variant	MODIFIER	pif-1
529	I	10776032	A	AT	3_prime_UTR_variant	MODIFIER	daf-16
529	II	14622391	C	CA	3_prime_UTR_variant	MODIFIER	mltn-9
529	II	15051037	GT	G	downstream_gene_variant	MODIFIER	asc-1
529	III	2071244	ACC	A	upstream_gene_variant	MODIFIER	Y39A3A.3
529	III	9292330	TAAGG	T	upstream_gene_variant	MODIFIER	K01B6.8
529	III	9292336	A	ATTTTTTTTTT	upstream_gene_variant	MODIFIER	K01B6.8
529	IV	514695	CTTT	C	disruptive_inframe_deletion	MODERATE	pig-1
529	V	3282017	TGGG	T	conservative_inframe_deletion	MODERATE	T28A11.2
529	V	8092109	T	TA	upstream_gene_variant	MODIFIER	str-128
529	V	8174491	GA	G	upstream_gene_variant	MODIFIER	srp-7
529	V	12064217	CACATTGCGTCTCTGCTGTG	C	frameshift_variant	HIGH	pqn-53
529	V	12064238	ACGG	A	disruptive_inframe_deletion	MODERATE	pqn-53
529	V	12064242	TTC	T	frameshift_variant	HIGH	pqn-53
529	X	245743	GT	G	upstream_gene_variant	MODIFIER	AC8.2
529	X	9348344	T	TAA	upstream_gene_variant	MODIFIER	oga-1
529	X	10844903	T	TAAAAATCAAACTCCTATAA	upstream_gene_variant	MODIFIER	C05A9.2
556	II	12162527	AC	A	frameshift_variant	HIGH	Y57A10A.7
556	III	826860	AC	A	downstream_gene_variant	MODIFIER	clec-149
556	III	3916415	GT	G	upstream_gene_variant	MODIFIER	pat-3
556	III	8452546	GT	G	upstream_gene_variant	MODIFIER	C30C11.8
556	IV	1649861	A	AT	upstream_gene_variant	MODIFIER	nhr-274
556	IV	1649863	C	CTGAAACTCGACTTTCAG	upstream_gene_variant	MODIFIER	nhr-274
556	IV	4020724	GGAA	G	upstream_gene_variant	MODIFIER	hlh-30
556	X	6088935	CATGCAAATTCGTGGGTTGTTCTCCCATTT	C	upstream_gene_variant	MODIFIER	C15H9.5
556	X	6111580	G	GT	upstream_gene_variant	MODIFIER	flu-2
556	X	17558242	GT	G	downstream_gene_variant	MODIFIER	abu-3
558	II	3128127	TTAGGCTTAGGCC	T	upstream_gene_variant	MODIFIER	ins-19
558	III	5008721	G	GT	upstream_gene_variant	MODIFIER	R144.6
558	IV	5275490	CG	C	upstream_gene_variant	MODIFIER	21ur-10656
558	V	8123436	GACA	G	upstream_gene_variant	MODIFIER	D1014.5
558	X	1716943	C	CATCTCAATTGACGCA	conservative_inframe_insertion	MODERATE	fbxa-53
558	X	15891685	T	TGA	upstream_gene_variant	MODIFIER	F53H4.3
569	I	2520746	CT	C	upstream_gene_variant	MODIFIER	21ur-15102
569	I	11223960	ACCC	A	disruptive_inframe_deletion	MODERATE	Y53H1A.2
569	I	11223964	GGATTCATGAATTTTT	G	stop_lost&conservative_inframe_deletion	HIGH	Y53H1A.2
569	II	2819386	GT	G	upstream_gene_variant	MODIFIER	K12H6.2
569	II	13481024	GT	G	upstream_gene_variant	MODIFIER	E01G4.6
569	IV	7057496	C	CT	upstream_gene_variant	MODIFIER	21ur-9749
569	IV	9539040	AT	A	upstream_gene_variant	MODIFIER	21ur-9004
569	V	28752	G	GC	upstream_gene_variant	MODIFIER	21ur-15398
569	V	9856284	ACT	A	frameshift_variant	HIGH	lsy-12
569	X	6022367	CA	C	upstream_gene_variant	MODIFIER	C09B8.4
569	X	6554021	TA	T	intron_variant	MODIFIER	svh-2
569	X	11964853	G	GT	upstream_gene_variant	MODIFIER	C49F5.9
569	X	12984726	TA	T	upstream_gene_variant	MODIFIER	F11C1.7
530	I	1978813	GA	G	upstream_gene_variant	MODIFIER	Y51F10.13
530	I	12234807	GT	G	upstream_gene_variant	MODIFIER	F14B6.4
530	I	14900511	CTAACCAAATAT	C	upstream_gene_variant	MODIFIER	frm-1
530	II	7659435	G	GT	downstream_gene_variant	MODIFIER	F18A1.7
530	II	15168946	TAGC	T	conservative_inframe_deletion	MODERATE	gst-29
530	III	6210	CAT	C	upstream_gene_variant	MODIFIER	fbxa-6
530	III	4900887	A	AT	frameshift_variant&stop_gained	HIGH	tag-340
530	III	10503212	G	GT	upstream_gene_variant	MODIFIER	urm-1
530	X	10924139	GAAATGT	G	upstream_gene_variant	MODIFIER	nstp-9
530	X	13338468	G	GA	upstream_gene_variant	MODIFIER	ptr-24
530	X	14299711	CA	C	upstream_gene_variant	MODIFIER	C11H1.8
530	X	16641070	G	GT	upstream_gene_variant	MODIFIER	C06G1.10
563	I	3269897	GT	G	upstream_gene_variant	MODIFIER	zip-4
563	I	11650160	AAGG	A	disruptive_inframe_deletion	MODERATE	W04G5.8
563	II	10509770	C	CA	upstream_gene_variant	MODIFIER	F59B10.9
563	III	1618073	G	GAGA	upstream_gene_variant	MODIFIER	Y22D7AL.9
563	III	5985312	G	GA	upstream_gene_variant	MODIFIER	frm-2
563	III	7620901	AATG	A	upstream_gene_variant	MODIFIER	fbn-1
563	III	10848212	C	CTA	frameshift_variant	HIGH	fbxb-85
563	III	10848213	GTGA	G	disruptive_inframe_deletion	MODERATE	fbxb-85
563	III	12523674	AT	A	upstream_gene_variant	MODIFIER	Y111B2A.25
563	IV	1742939	AT	A	upstream_gene_variant	MODIFIER	Y41D4A.4
563	V	1692283	TC	T	upstream_gene_variant	MODIFIER	Y46H3C.9
563	V	4828830	G	GA	upstream_gene_variant	MODIFIER	hsp-6
563	V	14926027	GA	G	upstream_gene_variant	MODIFIER	W09D12.1
563	X	2523160	TA	T	upstream_gene_variant	MODIFIER	R11B5.10
563	X	4982938	A	AG	upstream_gene_variant	MODIFIER	M03F4.10
563	X	14262803	C	CA	frameshift_variant&stop_lost&splice_region_variant	HIGH	E02H4.8
503	I	6823666	TAG	T	upstream_gene_variant	MODIFIER	ser-3
503	I	11368648	AT	A	intron_variant	MODIFIER	F56G4.6
503	I	12977758	AAATTTCCGGTTTGCCGGAAATTTT	A	upstream_gene_variant	MODIFIER	efsc-1
503	II	11079859	AATG	A	upstream_gene_variant	MODIFIER	C09H10.12
503	IV	571489	T	TA	upstream_gene_variant	MODIFIER	F56A11.5
503	IV	5277481	G	GA	upstream_gene_variant	MODIFIER	21ur-4832
503	IV	14542117	AT	A	upstream_gene_variant	MODIFIER	21ur-15364
503	IV	14814042	G	GA	upstream_gene_variant	MODIFIER	21ur-4824
503	IV	14886089	C	CG	upstream_gene_variant	MODIFIER	21ur-3791
503	V	14749505	T	TG	upstream_gene_variant	MODIFIER	Y50E8A.19
503	V	17742971	CCCCCTACAGTACCCCCTACAGTA	C	upstream_gene_variant	MODIFIER	cutl-4
503	X	3141123	AC	A	downstream_gene_variant	MODIFIER	K10B3.1
503	X	11958514	GGAAAAAATTT	G	upstream_gene_variant	MODIFIER	C49F5.8
503	X	13028590	GT	G	intergenic_region	MODIFIER	npr-10-C53C7.8
509	I	9603283	CT	C	upstream_gene_variant	MODIFIER	cri-1
509	I	14786871	GT	G	upstream_gene_variant	MODIFIER	uev-1
509	I	14809334	A	AAT	upstream_gene_variant	MODIFIER	Y54E5B.6
509	II	3723314	GA	G	upstream_gene_variant	MODIFIER	C46E10.2
509	III	2622509	T	TA	3_prime_UTR_variant	MODIFIER	ppfr-4
509	III	7647774	CTGAAAGCTGTCTTGACTCTGGAAGCT	C	frameshift_variant	HIGH	ZK783.3
509	IV	1201288	AT	A	downstream_gene_variant	MODIFIER	dsl-2
509	IV	3123975	GA	G	intron_variant	MODIFIER	mca-3
509	V	14936326	T	TC	upstream_gene_variant	MODIFIER	C30G7.2
509	V	18860997	A	AT	upstream_gene_variant	MODIFIER	wars-1
509	X	3298545	TG	T	upstream_gene_variant	MODIFIER	K09C4.1
509	X	11465933	C	CGCA	upstream_gene_variant	MODIFIER	T25C12.8
511	I	1346838	GA	G	upstream_gene_variant	MODIFIER	K12C11.1
511	I	7335784	G	GT	upstream_gene_variant	MODIFIER	glb-18
511	I	8378481	AT	A	downstream_gene_variant	MODIFIER	F16D3.6
511	II	4067309	TTCACC	T	upstream_gene_variant	MODIFIER	fbxb-118
511	III	1238238	TGAGCTGGC	T	upstream_gene_variant	MODIFIER	Y119D3B.27
511	III	1865625	C	CA	upstream_gene_variant	MODIFIER	Y39A3CR.3
511	IV	4929164	AT	A	upstream_gene_variant	MODIFIER	21ur-9737
511	IV	5634275	GAAACAGT	G	upstream_gene_variant	MODIFIER	srd-12
511	V	17640046	GA	G	upstream_gene_variant	MODIFIER	fbxa-191
511	X	973040	GA	G	splice_region_variant&intron_variant	LOW	vps-45
511	X	4162101	C	CA	upstream_gene_variant	MODIFIER	ZK470.1
514	II	12139835	AT	A	intron_variant	MODIFIER	Y57A10A.1
514	V	13008775	G	GT	upstream_gene_variant	MODIFIER	F15B9.15
514	V	18085856	TCAG	T	disruptive_inframe_deletion	MODERATE	Y59A8B.12
514	X	3178160	CA	C	upstream_gene_variant	MODIFIER	F56E3.8
548	II	6932858	A	AT	intron_variant	MODIFIER	flcn-1
548	II	12352156	GT	G	5_prime_UTR_variant	MODIFIER	ras-1
548	III	1672408	AAAAAAATTTTTTTTTTTG	A	upstream_gene_variant	MODIFIER	glb-30
548	III	3002713	AT	A	downstream_gene_variant	MODIFIER	daf-2
548	III	6195637	C	CT	upstream_gene_variant	MODIFIER	C23G10.6
548	V	16527098	CA	C	upstream_gene_variant	MODIFIER	srw-34
548	X	13704981	GA	G	upstream_gene_variant	MODIFIER	K02D3.1
552	II	8858752	CT	C	downstream_gene_variant	MODIFIER	snb-6
552	III	3563209	G	GA	upstream_gene_variant	MODIFIER	C48D5.9
552	IV	12099977	GCAT	G	disruptive_inframe_deletion	MODERATE	mon-2
552	IV	17468069	CAT	C	upstream_gene_variant	MODIFIER	F11E6.10
552	V	3153960	GT	G	frameshift_variant	HIGH	srab-7
552	V	7438137	T	TA	upstream_gene_variant	MODIFIER	ddo-2
552	V	19152794	C	CA	upstream_gene_variant	MODIFIER	Y39B6A.7
552	X	4820635	CAA	C	frameshift_variant	HIGH	R08E3.3
552	X	7604848	C	CT	upstream_gene_variant	MODIFIER	C44E12.4
552	X	11534584	CATCCAA	C	upstream_gene_variant	MODIFIER	C35C5.9
555	I	7339591	CT	C	upstream_gene_variant	MODIFIER	glb-18
555	I	11001472	A	AT	upstream_gene_variant	MODIFIER	21ur-14744
555	II	2692598	C	CA	upstream_gene_variant	MODIFIER	F34D6.9
555	II	3715390	GA	G	frameshift_variant	HIGH	srh-99
555	II	3773392	GGGGAAAGGGT	G	upstream_gene_variant	MODIFIER	T24E12.10
555	II	3812185	A	AG	upstream_gene_variant	MODIFIER	F54D10.5
555	II	3812186	ATT	A	upstream_gene_variant	MODIFIER	F54D10.5
555	II	8706768	AT	A	upstream_gene_variant	MODIFIER	ceh-7
555	II	12444844	GA	G	upstream_gene_variant	MODIFIER	Y57A10C.10
555	II	13491435	TAA	T	upstream_gene_variant	MODIFIER	alh-7
555	II	13720655	GACCGTA	G	upstream_gene_variant	MODIFIER	Y54G9A.4
555	II	13798091	GCCTA	G	intron_variant	MODIFIER	ZK131.11
555	III	12047247	TCA	T	intron_variant	MODIFIER	Y79H2A.3
555	IV	6270594	G	GT	upstream_gene_variant	MODIFIER	srv-29
555	IV	7043646	CAA	C	3_prime_UTR_variant	MODIFIER	klp-18
555	V	3630989	CT	C	upstream_gene_variant	MODIFIER	F59B1.4
555	X	2903457	GA	G	upstream_gene_variant	MODIFIER	F52B10.4
555	X	3351677	A	AC	upstream_gene_variant	MODIFIER	ZK816.8
555	X	8619996	CCAGAGTA	C	upstream_gene_variant	MODIFIER	K01A12.t1
572	I	4510271	G	GA	downstream_gene_variant	MODIFIER	gcy-28
572	I	4738491	TA	T	3_prime_UTR_variant	MODIFIER	let-502
572	I	4816208	AC	A	intergenic_region	MODIFIER	F54D7.2-F57C9.6
572	I	14401391	CT	C	upstream_gene_variant	MODIFIER	apg-1
572	II	3613937	ATGAT	A	frameshift_variant	HIGH	F40E12.2
572	II	4149768	G	GAAAA	downstream_gene_variant	MODIFIER	F56D3.1
572	II	6772160	AT	A	upstream_gene_variant	MODIFIER	F41G3.22
572	II	7830581	TA	T	upstream_gene_variant	MODIFIER	T09A5.14
572	II	11632540	CA	C	upstream_gene_variant	MODIFIER	ZK20.9
572	III	1739237	TA	T	downstream_gene_variant	MODIFIER	Y22D7AR.t1
572	III	7784458	TG	T	upstream_gene_variant	MODIFIER	mab-5
572	III	8306092	CCA	C	frameshift_variant	HIGH	F10E9.7
572	IV	7393850	CA	C	upstream_gene_variant	MODIFIER	T12B3.4
572	IV	8703975	CT	C	downstream_gene_variant	MODIFIER	ttll-11
572	V	1149128	AAAATTAAAAT	A	upstream_gene_variant	MODIFIER	linc-128
572	V	7784756	T	TA	upstream_gene_variant	MODIFIER	C26F1.1
572	V	14350805	C	CT	upstream_gene_variant	MODIFIER	Y49A3A.6
572	V	17897065	GA	G	upstream_gene_variant	MODIFIER	C06H5.11
572	X	3528150	AT	A	upstream_gene_variant	MODIFIER	F56B6.7
572	X	4353428	GTCTA	G	upstream_gene_variant	MODIFIER	col-165
572	X	8587998	GA	G	upstream_gene_variant	MODIFIER	F18E9.11
572	X	16627871	TA	T	downstream_gene_variant	MODIFIER	C06G1.9
572	X	16745640	CA	C	upstream_gene_variant	MODIFIER	C10E2.2
590	I	2609646	GA	G	upstream_gene_variant	MODIFIER	K07A3.4
590	I	3230034	A	AT	upstream_gene_variant	MODIFIER	cdt-1
590	I	10624353	GT	G	3_prime_UTR_variant	MODIFIER	mafr-1
590	I	12823547	ATTTTTGG	A	upstream_gene_variant	MODIFIER	Y18D10A.29
590	II	4115784	C	CAATTCT	upstream_gene_variant	MODIFIER	21ur-15129
590	III	10727982	TCATTC	T	downstream_gene_variant	MODIFIER	linc-109
590	III	10727989	ATTTCGTTTATT	A	downstream_gene_variant	MODIFIER	linc-109
590	III	10728003	AGCAC	A	downstream_gene_variant	MODIFIER	linc-109
590	III	10728012	T	TCC	downstream_gene_variant	MODIFIER	linc-109
590	V	1197075	AT	A	3_prime_UTR_variant	MODIFIER	wrb-1
590	V	7702461	GTAAAGTTTGAATTC	G	upstream_gene_variant	MODIFIER	srw-3
590	V	10272003	C	CT	upstream_gene_variant	MODIFIER	Y22F5A.8
590	V	10783254	AGTGTTC	A	upstream_gene_variant	MODIFIER	D1054.6
590	V	18871284	CA	C	upstream_gene_variant	MODIFIER	ceh-51
592	I	162555	GCA	G	frameshift_variant	HIGH	ptr-11
592	I	2957526	C	CA	intron_variant	MODIFIER	bam-2
592	I	4706267	TAGGTACAAAAC	T	upstream_gene_variant	MODIFIER	W09C3.3
592	I	5718873	CAATTTCG	C	downstream_gene_variant	MODIFIER	C04F1.5
592	I	7942387	GGCAACCGGCAACTTTTCA	G	upstream_gene_variant	MODIFIER	glb-26
592	II	6707296	G	GA	upstream_gene_variant	MODIFIER	rpy-1
592	II	11113174	CA	C	upstream_gene_variant	MODIFIER	glb-4
592	II	12481940	TTTGC	T	upstream_gene_variant	MODIFIER	chil-28
592	III	2344964	A	AT	upstream_gene_variant	MODIFIER	gip-1
592	III	9363205	G	GT	upstream_gene_variant	MODIFIER	crn-6
592	III	12494456	CCCACTGGCGCTACT	C	upstream_gene_variant	MODIFIER	Y49E10.25
592	IV	1711462	CTGTTG	C	upstream_gene_variant	MODIFIER	pbs-1
592	IV	3800504	A	AT	upstream_gene_variant	MODIFIER	osm-3
592	V	1841959	TA	T	upstream_gene_variant	MODIFIER	T10B5.8
592	V	2055722	TA	T	upstream_gene_variant	MODIFIER	comt-5
592	V	11277754	CA	C	upstream_gene_variant	MODIFIER	C03E10.8
592	V	14939339	ATT	A	downstream_gene_variant	MODIFIER	C30G7.2
592	V	20790669	AT	A	3_prime_UTR_variant	MODIFIER	Y44A6D.2
592	X	2918089	GA	G	upstream_gene_variant	MODIFIER	F52B10.12
592	X	3888716	AGCCAGTTGGAGCGTATTAT	A	frameshift_variant	HIGH	F47F2.1
592	X	3888738	CGATTGGTAAGTTGGTAGT	C	frameshift_variant&splice_donor_variant&splice_region_variant&intron_variant	HIGH	F47F2.1
592	X	12927396	T	TGAGTAGATAA	upstream_gene_variant	MODIFIER	C34E7.3
592	X	16030612	GA	G	upstream_gene_variant	MODIFIER	B0395.9
595	I	4980604	AACC	A	upstream_gene_variant	MODIFIER	W03G9.10
595	I	12582515	CA	C	upstream_gene_variant	MODIFIER	F33E2.10
595	II	3291952	CA	C	upstream_gene_variant	MODIFIER	F39E9.23
595	II	4324077	A	AGAGAAATCG	3_prime_UTR_variant	MODIFIER	H20J04.6
595	II	12251585	A	AT	upstream_gene_variant	MODIFIER	tag-276
595	IV	9842742	TA	T	frameshift_variant&splice_region_variant	HIGH	K07F5.17
595	IV	11593761	G	GTA	upstream_gene_variant	MODIFIER	F40F11.4
595	IV	16324044	G	GT	upstream_gene_variant	MODIFIER	21ur-9320
595	V	1977306	C	CA	upstream_gene_variant	MODIFIER	T08B1.4
595	V	3997516	A	AT	frameshift_variant	HIGH	K09D9.11
595	V	6953465	CG	C	upstream_gene_variant	MODIFIER	Y57E12B.11
595	X	15196273	GA	G	splice_region_variant&intron_variant	LOW	snt-7
566	I	2933353	TCGAAAAATCGAAAAA	T	upstream_gene_variant	MODIFIER	Y71F9AM.7
566	I	8591607	C	CA	upstream_gene_variant	MODIFIER	daf-8
566	I	12863022	GA	G	splice_region_variant&intron_variant	LOW	Y18D10A.11
566	II	4878583	C	CA	upstream_gene_variant	MODIFIER	F11G11.13
566	III	6423549	GA	G	upstream_gene_variant	MODIFIER	atgl-1
566	IV	2514335	A	AT	upstream_gene_variant	MODIFIER	Y69A2AR.16
566	IV	6449834	T	TA	upstream_gene_variant	MODIFIER	21ur-1928
566	IV	13009682	G	GC	downstream_gene_variant	MODIFIER	21ur-15150
566	IV	13285287	AT	A	upstream_gene_variant	MODIFIER	cpsf-3
566	X	9101390	AG	A	upstream_gene_variant	MODIFIER	C25A11.7
566	X	10272722	TCAGCAAGTTTTAACATG	T	upstream_gene_variant	MODIFIER	F41E7.2
573	I	370084	CT	C	downstream_gene_variant	MODIFIER	rnp-8
573	I	4958604	ATAAAGC	A	upstream_gene_variant	MODIFIER	him-1
573	I	10775950	TTTTCGCTGTAAATTTG	T	3_prime_UTR_variant	MODIFIER	daf-16
573	I	13650871	T	TAG	upstream_gene_variant	MODIFIER	dkf-1
573	II	4567723	G	GGCCCAAAAA	upstream_gene_variant	MODIFIER	M03A1.t2
573	III	5043892	C	CA	upstream_gene_variant	MODIFIER	C45G9.14
573	III	11860186	TC	T	downstream_gene_variant	MODIFIER	taf-12
573	IV	14372030	T	TC	upstream_gene_variant	MODIFIER	21ur-4795
573	V	121800	GT	G	downstream_gene_variant	MODIFIER	Y38C9A.1
573	V	347470	AT	A	3_prime_UTR_variant	MODIFIER	wago-10
573	X	1440518	CA	C	upstream_gene_variant	MODIFIER	sedl-1
573	X	5412929	TA	T	upstream_gene_variant	MODIFIER	C41A3.1
573	X	7590930	CAG	C	upstream_gene_variant	MODIFIER	F08C6.13
573	X	15558652	AATC	A	upstream_gene_variant	MODIFIER	C02C6.12
575	I	479841	AT	A	downstream_gene_variant	MODIFIER	W04C9.9
575	I	1410060	GGAGA	G	downstream_gene_variant	MODIFIER	Y92H12BR.2
pAsp	I	1483162	AG	A	frameshift_variant	HIGH	dyb-1
575	II	9158067	AT	A	upstream_gene_variant	MODIFIER	oac-54
575	II	11193690	GATAAT	G	downstream_gene_variant	MODIFIER	F37H8.5
575	II	14868171	A	AT	upstream_gene_variant	MODIFIER	R05H10.3
575	IV	1582035	A	AT	downstream_gene_variant	MODIFIER	Y41D4B.14
575	IV	14344953	TA	T	upstream_gene_variant	MODIFIER	21ur-761
pTyr	IV	15461520	TAG	T	frameshift_variant	HIGH	ntl-11
575	IV	17023087	TCCG	T	upstream_gene_variant	MODIFIER	21ur-14921
575	V	4177963	A	ATAGAT	upstream_gene_variant	MODIFIER	coh-4
575	V	16766484	AT	A	upstream_gene_variant	MODIFIER	F14D1.3

## Sheet: PB306_BS
Line	CHROM	POS	REF	ALT	type	putative effect	Gene annotation
402	III	1377303	A	C	upstream_gene_variant	MODIFIER	Y82E9BR.10
402	III	7124849	T	G	splice_region_variant&intron_variant	LOW	B0280.2
402	III	7615565	C	A	missense_variant	MODERATE	T04A6.2
402	III	9057512	G	C	missense_variant	MODERATE	cls-2
402	III	10690934	T	A	upstream_gene_variant	MODIFIER	fmo-3
402	III	10878399	C	A	stop_gained	HIGH	C44B9.3
402	III	11427953	G	A	missense_variant	MODERATE	Y47D3B.6
402	III	12691004	G	A	upstream_gene_variant	MODIFIER	rsp-3
402	III	13002905	T	G	upstream_gene_variant	MODIFIER	ZK1010.8
402	IV	249991	G	T	missense_variant	MODERATE	R02D3.1
402	IV	9078058	G	A	missense_variant	MODERATE	mans-4
402	IV	13849866	T	G	upstream_gene_variant	MODIFIER	21ur-6213
402	IV	15990135	T	A	upstream_gene_variant	MODIFIER	21ur-2443
402	I	4745301	C	T	upstream_gene_variant	MODIFIER	let-502
402	I	8964678	T	A	upstream_gene_variant	MODIFIER	F32H2.11
402	I	10245212	T	A	upstream_gene_variant	MODIFIER	ZC247.8
402	I	10251216	A	C	missense_variant	MODERATE	lin-11
402	I	10251217	C	A	missense_variant	MODERATE	lin-11
402	I	10251220	C	A	missense_variant	MODERATE	lin-11
402	I	10288525	C	A	upstream_gene_variant	MODIFIER	T20F10.8
402	I	13779093	A	T	upstream_gene_variant	MODIFIER	21ur-15587
402	II	221576	C	A	upstream_gene_variant	MODIFIER	F48A11.4
402	II	681300	G	A	upstream_gene_variant	MODIFIER	T02H6.10
402	II	1218823	T	A	intron_variant	MODIFIER	F53A10.2
402	II	2561215	C	T	missense_variant	MODERATE	nep-18
402	II	4108042	T	A	upstream_gene_variant	MODIFIER	T08H4.6
402	II	8937334	C	T	upstream_gene_variant	MODIFIER	T21B10.4
402	II	9560530	A	G	upstream_gene_variant	MODIFIER	F35H8.4
402	II	10276586	C	T	downstream_gene_variant	MODIFIER	ZK971.1
402	II	14553519	G	A	upstream_gene_variant	MODIFIER	gcy-29
402	II	14890034	C	T	upstream_gene_variant	MODIFIER	Y53F4A.4
402	V	43944	T	C	upstream_gene_variant	MODIFIER	B0348.2
402	V	742688	T	C	upstream_gene_variant	MODIFIER	srj-24
402	V	1603509	A	T	downstream_gene_variant	MODIFIER	F16B4.3
402	V	1883545	G	A	upstream_gene_variant	MODIFIER	oig-6
402	V	12043686	T	A	missense_variant	MODERATE	F10C2.4
402	V	12043687	T	C	synonymous_variant	LOW	F10C2.4
402	V	12698683	T	A	upstream_gene_variant	MODIFIER	parn-1
402	V	12946037	G	A	missense_variant	MODERATE	grl-2
402	V	13793577	T	A	upstream_gene_variant	MODIFIER	twk-32
402	V	13947668	C	A	upstream_gene_variant	MODIFIER	srx-127
402	V	17329727	T	C	upstream_gene_variant	MODIFIER	sdz-16
402	V	17468027	C	A	upstream_gene_variant	MODIFIER	srh-114
402	V	17468035	C	G	upstream_gene_variant	MODIFIER	srh-114
402	V	17468040	C	T	upstream_gene_variant	MODIFIER	srh-114
402	V	17468052	C	T	upstream_gene_variant	MODIFIER	srh-114
402	V	17468055	T	G	upstream_gene_variant	MODIFIER	srh-114
402	V	17468058	A	G	upstream_gene_variant	MODIFIER	srh-114
402	V	17468093	A	G	upstream_gene_variant	MODIFIER	srh-114
402	V	17468098	T	C	upstream_gene_variant	MODIFIER	srh-114
402	V	17468101	T	G	upstream_gene_variant	MODIFIER	srh-114
402	V	17468109	T	C	upstream_gene_variant	MODIFIER	srh-114
402	V	17468110	G	A	upstream_gene_variant	MODIFIER	srh-114
402	V	17503011	G	A	upstream_gene_variant	MODIFIER	srw-31
402	V	17503017	G	T	splice_region_variant&intron_variant	LOW	K03D7.3
402	V	17503023	G	A	splice_donor_variant&intron_variant	HIGH	K03D7.3
402	V	18711358	T	A	upstream_gene_variant	MODIFIER	Y17D7C.4
402	V	18904368	T	G	upstream_gene_variant	MODIFIER	nhr-243
402	V	19051927	A	T	upstream_gene_variant	MODIFIER	asp-1
402	V	19051930	G	T	upstream_gene_variant	MODIFIER	asp-1
402	V	19351432	C	T	upstream_gene_variant	MODIFIER	C14B4.2
402	X	1127633	T	A	synonymous_variant	LOW	lmp-2
402	X	2724494	A	T	missense_variant	MODERATE	unc-2
402	X	3456815	A	C	upstream_gene_variant	MODIFIER	ZK377.10
402	X	8994363	G	C	missense_variant	MODERATE	C24A3.4
402	X	9105290	A	G	missense_variant	MODERATE	ajm-1
402	X	12942552	T	A	upstream_gene_variant	MODIFIER	C05E7.2
402	X	13415285	C	A	upstream_gene_variant	MODIFIER	C29F7.8
402	X	15985726	T	A	upstream_gene_variant	MODIFIER	C09G1.2
403	III	5266556	T	A	upstream_gene_variant	MODIFIER	C34E10.9
403	III	5480733	A	T	upstream_gene_variant	MODIFIER	R02F2.6
403	III	8600728	C	G	upstream_gene_variant	MODIFIER	ztf-30
403	IV	272934	G	A	missense_variant	MODERATE	srh-282
403	IV	3715572	C	A	downstream_gene_variant	MODIFIER	Y37E11AL.1
403	IV	4263039	C	A	upstream_gene_variant	MODIFIER	linc-114
403	IV	5541432	T	A	upstream_gene_variant	MODIFIER	fem-1
403	IV	6224993	G	T	upstream_gene_variant	MODIFIER	C49A9.2
403	IV	7025946	A	G	upstream_gene_variant	MODIFIER	C06G3.4
403	IV	7025964	A	T	upstream_gene_variant	MODIFIER	C06G3.4
403	IV	12026924	A	G	3_prime_UTR_variant	MODIFIER	T12G3.7
403	IV	12782696	T	C	missense_variant	MODERATE	unc-31
403	IV	16670085	G	A	upstream_gene_variant	MODIFIER	21ur-716
403	I	1060407	T	G	upstream_gene_variant	MODIFIER	npr-23
403	I	3825149	C	A	missense_variant	MODERATE	unc-108
403	I	11224714	C	A	upstream_gene_variant	MODIFIER	rsy-1
403	I	11733871	A	T	upstream_gene_variant	MODIFIER	F35E2.11
403	I	13214080	G	T	upstream_gene_variant	MODIFIER	ZK1225.9
403	I	13693342	C	T	upstream_gene_variant	MODIFIER	W04A4.7
403	I	14899130	A	T	upstream_gene_variant	MODIFIER	frm-1
403	I	14899134	T	A	upstream_gene_variant	MODIFIER	frm-1
403	II	81581	G	A	upstream_gene_variant	MODIFIER	C23H3.9
403	II	2562422	G	A	synonymous_variant	LOW	nep-18
403	II	5115387	C	T	upstream_gene_variant	MODIFIER	msp-74
403	II	6858885	A	T	upstream_gene_variant	MODIFIER	dnj-5
403	II	9882792	A	T	3_prime_UTR_variant	MODIFIER	C08H9.3
403	II	10918321	C	G	upstream_gene_variant	MODIFIER	F44F4.9
403	II	12200882	T	A	upstream_gene_variant	MODIFIER	polg-1
403	II	12678560	T	G	upstream_gene_variant	MODIFIER	Y38E10A.22
403	V	835589	T	A	upstream_gene_variant	MODIFIER	F41H8.5
403	V	3419767	C	T	downstream_gene_variant	MODIFIER	T20D4.5
403	V	3419779	C	T	downstream_gene_variant	MODIFIER	T20D4.5
403	V	5069146	C	A	upstream_gene_variant	MODIFIER	mlk-1
403	V	6280860	C	G	missense_variant	MODERATE	K12B6.4
403	V	8466417	G	A	upstream_gene_variant	MODIFIER	dnj-22
403	V	18009977	T	A	upstream_gene_variant	MODIFIER	linc-62
403	V	18009982	G	T	upstream_gene_variant	MODIFIER	linc-62
403	V	18010000	A	T	upstream_gene_variant	MODIFIER	linc-62
403	V	18010005	T	A	upstream_gene_variant	MODIFIER	linc-62
403	V	18649943	A	G	splice_region_variant&non_coding_transcript_exon_variant	LOW	linc-168
403	X	3896221	C	T	upstream_gene_variant	MODIFIER	F47F2.3
403	X	4505145	T	A	upstream_gene_variant	MODIFIER	dgk-2
403	X	8505436	G	T	upstream_gene_variant	MODIFIER	H03E18.5
403	X	9931086	T	G	upstream_gene_variant	MODIFIER	C17G1.13
403	X	10732058	G	C	missense_variant	MODERATE	T01C1.t1
403	X	10935208	G	A	upstream_gene_variant	MODIFIER	T21B6.11
403	X	11497302	G	T	missense_variant	MODERATE	T25C12.3
403	X	11592448	G	A	upstream_gene_variant	MODIFIER	F52D10.2
403	X	11790083	G	C	upstream_gene_variant	MODIFIER	C34E11.20
403	X	13729145	G	A	synonymous_variant	LOW	pix-1
406	III	50315	G	A	downstream_gene_variant	MODIFIER	W05G11.7
406	III	1633323	A	G	missense_variant	MODERATE	Y22D7AL.11
406	III	4281955	G	A	upstream_gene_variant	MODIFIER	sup-26
406	III	6578661	T	A	5_prime_UTR_variant	MODIFIER	F27B3.6
406	III	7643436	C	T	upstream_gene_variant	MODIFIER	upp-1
406	IV	2387319	A	T	upstream_gene_variant	MODIFIER	21ur-15588
406	IV	3197910	A	T	upstream_gene_variant	MODIFIER	Y67D8B.5
406	IV	3624523	A	T	intron_variant	MODIFIER	cha-1
406	IV	6486196	A	T	synonymous_variant	LOW	tyr-6
406	IV	9880379	G	A	missense_variant	MODERATE	nhr-4
406	IV	11276550	G	A	synonymous_variant	LOW	gtl-2
406	IV	12003744	G	T	upstream_gene_variant	MODIFIER	ZK617.13
406	IV	15334626	A	T	upstream_gene_variant	MODIFIER	21ur-7937
406	IV	15990694	C	A	upstream_gene_variant	MODIFIER	21ur-1837
406	I	587590	G	C	missense_variant	MODERATE	hum-7
406	I	832463	C	T	missense_variant	MODERATE	zfh-2
406	I	1611528	C	T	synonymous_variant	LOW	adpr-1
406	I	1828713	G	A	upstream_gene_variant	MODIFIER	C53H9.2
406	I	3917938	C	G	upstream_gene_variant	MODIFIER	T20F5.4
406	I	4227365	A	T	upstream_gene_variant	MODIFIER	nab-1
406	I	6427651	T	A	upstream_gene_variant	MODIFIER	F37E3.4
406	I	8444148	T	A	upstream_gene_variant	MODIFIER	F10D11.3
406	I	8507304	A	T	upstream_gene_variant	MODIFIER	ceh-6
406	I	14036090	G	C	upstream_gene_variant	MODIFIER	ins-24
406	II	1136266	T	A	upstream_gene_variant	MODIFIER	W09B6.4
406	II	2805264	G	T	upstream_gene_variant	MODIFIER	nhr-119
406	II	12788569	T	A	3_prime_UTR_variant	MODIFIER	cpt-1
406	V	2579152	A	C	upstream_gene_variant	MODIFIER	C29G2.3
406	V	4924852	G	T	upstream_gene_variant	MODIFIER	C02E7.17
406	V	9624563	C	A	upstream_gene_variant	MODIFIER	T06E4.8
406	V	10477644	T	A	upstream_gene_variant	MODIFIER	21ur-15622
406	V	14765666	T	C	non_coding_transcript_exon_variant	MODIFIER	Y50E8A.14
406	V	14765667	C	T	non_coding_transcript_exon_variant	MODIFIER	Y50E8A.14
406	V	17655682	C	A	upstream_gene_variant	MODIFIER	fbxa-193
406	V	18099948	G	A	upstream_gene_variant	MODIFIER	par-4
406	X	3351745	C	T	upstream_gene_variant	MODIFIER	ZK816.8
406	X	8441053	C	T	upstream_gene_variant	MODIFIER	F08F1.12
406	X	8453892	C	T	missense_variant&splice_region_variant	MODERATE	dpy-6
406	X	8994193	G	T	splice_region_variant&intron_variant	LOW	C24A3.4
406	X	12307040	G	T	stop_gained	HIGH	phf-32
406	X	14089895	A	T	upstream_gene_variant	MODIFIER	dsl-4
410	III	4165098	T	A	missense_variant	MODERATE	rnf-5
410	III	5761163	T	A	upstream_gene_variant	MODIFIER	B0244.t1
410	IV	1806524	T	A	upstream_gene_variant	MODIFIER	Y38C1BA.1
410	IV	4709569	A	G	missense_variant	MODERATE	cif-1
410	IV	5262525	G	A	upstream_gene_variant	MODIFIER	F36H12.65
410	IV	7752692	A	G	upstream_gene_variant	MODIFIER	klo-1
410	IV	11299934	T	A	upstream_gene_variant	MODIFIER	mttu-1
410	IV	15121301	G	A	upstream_gene_variant	MODIFIER	21ur-2660
410	IV	17372679	A	G	upstream_gene_variant	MODIFIER	21ur-15377
410	I	1451759	C	T	upstream_gene_variant	MODIFIER	F47G6.6
410	I	2330162	T	G	splice_region_variant	LOW	srbc-64
410	I	6457936	A	T	upstream_gene_variant	MODIFIER	mam-8
410	I	7384085	A	C	upstream_gene_variant	MODIFIER	unc-15
410	I	7916198	T	A	upstream_gene_variant	MODIFIER	F55D12.5
410	I	8041620	T	A	synonymous_variant	LOW	vacl-14
410	I	10374477	A	G	upstream_gene_variant	MODIFIER	ned-8
410	I	13220908	G	A	upstream_gene_variant	MODIFIER	ZK1225.4
410	I	14014371	G	C	upstream_gene_variant	MODIFIER	ins-28
410	II	980522	G	A	missense_variant	MODERATE	fbxc-15
410	II	1269521	G	A	splice_region_variant	LOW	srw-66
410	II	1391712	A	C	downstream_gene_variant	MODIFIER	aat-7
410	II	5404525	T	C	synonymous_variant	LOW	mog-5
410	II	5468422	A	T	upstream_gene_variant	MODIFIER	F56D1.8
410	II	5747109	T	A	upstream_gene_variant	MODIFIER	F10C1.9
410	II	11408290	G	C	upstream_gene_variant	MODIFIER	C05D12.7
410	II	14621654	C	T	upstream_gene_variant	MODIFIER	mltn-10
410	V	672130	G	A	upstream_gene_variant	MODIFIER	nhr-180
410	V	2216472	C	T	upstream_gene_variant	MODIFIER	nhr-133
410	V	2872138	C	A	upstream_gene_variant	MODIFIER	srh-241
410	V	4375484	C	T	synonymous_variant	LOW	F32D1.7
410	V	6119191	G	A	missense_variant	MODERATE	ceh-49
410	V	9353242	A	G	upstream_gene_variant	MODIFIER	srx-46
410	V	11910163	C	T	intron_variant	MODIFIER	sma-1
410	V	12068816	C	T	synonymous_variant	LOW	kmo-1
410	V	13235224	C	T	upstream_gene_variant	MODIFIER	C34D1.8
410	V	15590684	G	A	downstream_gene_variant	MODIFIER	F28F8.10
410	V	17227520	A	C	missense_variant	MODERATE	scl-25
410	V	18406808	A	C	upstream_gene_variant	MODIFIER	srh-209
410	V	18444144	T	A	upstream_gene_variant	MODIFIER	ZK228.1
410	X	2502698	T	C	missense_variant	MODERATE	K02E10.7
410	X	2664001	G	A	upstream_gene_variant	MODIFIER	C09B7.6
410	X	3432363	T	C	upstream_gene_variant	MODIFIER	ZK813.4
410	X	8222422	T	A	upstream_gene_variant	MODIFIER	K02A6.4
410	X	10010993	G	A	upstream_gene_variant	MODIFIER	F19C6.3
410	X	10673192	G	A	missense_variant	MODERATE	F13E6.2
410	X	12001849	G	A	upstream_gene_variant	MODIFIER	sma-5
410	X	14576575	T	G	upstream_gene_variant	MODIFIER	C44H4.12
410	X	15636150	T	A	upstream_gene_variant	MODIFIER	K09E9.8
414	III	369657	G	A	synonymous_variant	LOW	pll-1
414	III	1788965	A	T	upstream_gene_variant	MODIFIER	rimb-1
414	III	2032257	G	A	upstream_gene_variant	MODIFIER	M01E10.t1
414	III	3419935	G	A	splice_region_variant&intron_variant	LOW	F59A2.6
414	III	4224465	A	T	upstream_gene_variant	MODIFIER	F43C1.5
414	III	4604192	C	A	downstream_gene_variant	MODIFIER	mab-21
414	III	5059428	A	C	upstream_gene_variant	MODIFIER	C45G9.9
414	III	5507951	C	A	missense_variant	MODERATE	D1044.7
414	III	10985857	G	A	upstream_gene_variant	MODIFIER	col-92
414	III	11347054	A	G	upstream_gene_variant	MODIFIER	T28D6.6
414	III	11624943	T	C	upstream_gene_variant	MODIFIER	gly-8
414	IV	1440295	T	G	upstream_gene_variant	MODIFIER	clp-7
414	IV	4628992	G	A	upstream_gene_variant	MODIFIER	21ur-9960
414	IV	5592813	G	A	upstream_gene_variant	MODIFIER	21ur-10155
414	IV	6056827	C	A	upstream_gene_variant	MODIFIER	21ur-7233
414	IV	6168435	A	T	upstream_gene_variant	MODIFIER	21ur-8078
414	IV	15511578	G	C	upstream_gene_variant	MODIFIER	gyg-3
414	IV	16027878	C	G	upstream_gene_variant	MODIFIER	jac-1
414	I	1434141	T	A	upstream_gene_variant	MODIFIER	Y92H12BR.4
414	I	3674611	G	A	upstream_gene_variant	MODIFIER	smp-2
414	I	6031527	A	T	synonymous_variant	LOW	vps-34
414	I	6532437	C	A	missense_variant	MODERATE	nuo-2
414	I	8654073	T	C	upstream_gene_variant	MODIFIER	flp-22
414	I	10287995	T	C	upstream_gene_variant	MODIFIER	T20F10.8
414	I	12709980	C	A	missense_variant	MODERATE	T06G6.3
414	II	976162	T	C	upstream_gene_variant	MODIFIER	C32B5.15
414	II	1288757	G	T	stop_gained	HIGH	srz-64
414	II	4034375	T	A	upstream_gene_variant	MODIFIER	K07D4.4
414	II	6310901	G	C	upstream_gene_variant	MODIFIER	21ur-14812
414	II	7704779	T	C	missense_variant	MODERATE	B0495.7
414	II	11886091	A	G	missense_variant	MODERATE	ZK930.6
414	II	13325964	T	A	upstream_gene_variant	MODIFIER	sam-10
414	V	3894397	C	A	missense_variant	MODERATE	C17E7.4
414	V	6738795	T	A	upstream_gene_variant	MODIFIER	ZC487.6
414	V	8397000	A	T	upstream_gene_variant	MODIFIER	pho-6
414	X	2986710	T	A	downstream_gene_variant	MODIFIER	Y41G9A.2
414	X	6025659	C	G	upstream_gene_variant	MODIFIER	C09B8.5
414	X	7706541	T	A	upstream_gene_variant	MODIFIER	K09F5.12
414	X	7864645	G	A	upstream_gene_variant	MODIFIER	cca-1
414	X	9356644	T	A	intergenic_region	MODIFIER	flp-20-pkc-2
414	X	10834414	G	A	upstream_gene_variant	MODIFIER	frm-9
414	X	16838806	C	T	upstream_gene_variant	MODIFIER	F41G4.7
414	X	17237456	G	A	synonymous_variant	LOW	T25G12.11
415	III	713710	T	G	upstream_gene_variant	MODIFIER	C24A1.6
415	III	4778867	G	A	missense_variant	MODERATE	B0393.9
415	III	5464397	G	A	upstream_gene_variant	MODIFIER	F48E8.2
415	III	10903224	A	T	upstream_gene_variant	MODIFIER	unc-119
415	III	12382879	T	C	upstream_gene_variant	MODIFIER	Y49E10.7
415	III	12382885	A	C	upstream_gene_variant	MODIFIER	Y49E10.7
415	IV	2241694	C	T	upstream_gene_variant	MODIFIER	M70.2
415	IV	3987502	C	T	upstream_gene_variant	MODIFIER	clec-78
415	IV	7782417	G	T	5_prime_UTR_variant	MODIFIER	sec-10
415	IV	9144486	C	T	upstream_gene_variant	MODIFIER	21ur-8153
415	IV	10625059	A	C	missense_variant	MODERATE	R09H10.5
415	IV	11387923	A	T	upstream_gene_variant	MODIFIER	H02I12.10
415	IV	14818318	A	T	upstream_gene_variant	MODIFIER	Y57G11C.46
415	IV	15136739	C	T	upstream_gene_variant	MODIFIER	col-135
415	IV	17073521	G	A	upstream_gene_variant	MODIFIER	Y116A8C.24
415	I	768683	A	G	upstream_gene_variant	MODIFIER	T06A4.1
415	I	1203989	A	C	upstream_gene_variant	MODIFIER	Y48G8AL.5
415	I	2197352	G	C	upstream_gene_variant	MODIFIER	afd-1
415	I	7671981	G	A	upstream_gene_variant	MODIFIER	T24B1.1
415	I	10635112	G	A	synonymous_variant	LOW	B0511.13
415	I	11114465	C	T	intron_variant	MODIFIER	hmr-1
415	I	12665491	T	A	missense_variant	MODERATE	T26E3.4
415	I	12893703	C	T	missense_variant	MODERATE	pad-1
415	II	8115414	G	A	upstream_gene_variant	MODIFIER	lron-4
415	II	9127578	G	A	missense_variant	MODERATE	2020-06-01
415	V	226840	T	C	synonymous_variant	LOW	srh-77
415	V	1724828	T	A	upstream_gene_variant	MODIFIER	sri-27
415	V	2142337	A	T	upstream_gene_variant	MODIFIER	F22F7.7
415	V	5154662	C	T	splice_region_variant&intron_variant	LOW	srx-38
415	V	7731766	T	C	upstream_gene_variant	MODIFIER	Y97E10C.t1
415	V	9203732	T	G	missense_variant	MODERATE	asp-2
415	V	11206060	T	C	upstream_gene_variant	MODIFIER	K10D6.15
415	V	11489743	G	T	upstream_gene_variant	MODIFIER	T11F9.16
415	V	12932565	A	G	missense_variant	MODERATE	T16G1.2
415	V	13905023	C	T	synonymous_variant	LOW	stdh-3
415	V	17164967	T	A	upstream_gene_variant	MODIFIER	srz-65
415	V	19150388	C	G	upstream_gene_variant	MODIFIER	Y39B6A.7
415	X	2939134	T	A	upstream_gene_variant	MODIFIER	Y71H10A.3
415	X	7513663	A	C	missense_variant	MODERATE	F48E3.8
415	X	7919182	C	T	downstream_gene_variant	MODIFIER	C09C7.2
415	X	8008442	A	T	upstream_gene_variant	MODIFIER	F45E1.10
415	X	10328147	T	A	upstream_gene_variant	MODIFIER	acl-5
419	III	1673897	C	A	intron_variant	MODIFIER	Y22D7AR.6
419	III	6133621	T	C	upstream_gene_variant	MODIFIER	mvk-1
419	III	9479767	A	T	intron_variant	MODIFIER	bre-3
419	III	13302052	A	G	missense_variant	MODERATE	Y43F4B.5
419	IV	1008298	C	T	upstream_gene_variant	MODIFIER	immp-2
419	IV	5104025	T	A	upstream_gene_variant	MODIFIER	C02B10.3
419	IV	5285355	G	C	upstream_gene_variant	MODIFIER	21ur-10235
419	IV	8681108	G	T	upstream_gene_variant	MODIFIER	F08B4.4
419	IV	13165582	A	C	upstream_gene_variant	MODIFIER	F09E8.11
419	IV	13950051	G	A	upstream_gene_variant	MODIFIER	21ur-7579
419	IV	14459563	G	A	upstream_gene_variant	MODIFIER	21ur-4100
419	IV	15547532	A	G	upstream_gene_variant	MODIFIER	21ur-2282
419	IV	15564807	T	A	upstream_gene_variant	MODIFIER	21ur-6279
419	IV	16545106	G	A	upstream_gene_variant	MODIFIER	Y51H4A.7
419	I	2967486	T	A	upstream_gene_variant	MODIFIER	Y71F9AR.7
419	I	5315647	T	A	upstream_gene_variant	MODIFIER	let-526
419	I	7732360	C	G	missense_variant	MODERATE	F27D4.6
419	I	9426919	T	G	upstream_gene_variant	MODIFIER	pabp-2
419	II	201765	C	T	upstream_gene_variant	MODIFIER	chs-2
419	II	201768	T	A	upstream_gene_variant	MODIFIER	chs-2
419	II	8496625	A	G	downstream_gene_variant	MODIFIER	21ur-12701
419	II	10334192	C	A	upstream_gene_variant	MODIFIER	M02G9.5
419	II	13527929	T	C	missense_variant	MODERATE	snx-14
419	II	14882072	T	A	upstream_gene_variant	MODIFIER	Y53F4A.2
419	V	3615211	G	A	upstream_gene_variant	MODIFIER	T22F3.10
419	V	7592115	G	C	upstream_gene_variant	MODIFIER	F19F10.11
419	V	9727381	G	T	synonymous_variant	LOW	aagr-3
419	V	9785316	T	A	missense_variant	MODERATE	F46B6.6
419	V	17338530	C	T	upstream_gene_variant	MODIFIER	fbxa-187
419	V	20175304	G	C	upstream_gene_variant	MODIFIER	srw-39
419	V	20566893	C	T	upstream_gene_variant	MODIFIER	F26F2.1
419	X	778168	G	A	synonymous_variant	LOW	nas-15
419	X	2482549	A	C	upstream_gene_variant	MODIFIER	K02E10.5
419	X	4983582	G	A	5_prime_UTR_variant	MODIFIER	lfi-1
419	X	5148512	A	C	upstream_gene_variant	MODIFIER	C31H2.14
419	X	8752682	C	T	upstream_gene_variant	MODIFIER	asns-2
419	X	8777873	C	A	upstream_gene_variant	MODIFIER	ZK721.4
419	X	9030356	G	A	missense_variant	MODERATE	snf-12
419	X	9676453	T	G	upstream_gene_variant	MODIFIER	C43C3.4
419	X	10760143	G	A	upstream_gene_variant	MODIFIER	R07A4.4
419	X	13291278	T	G	upstream_gene_variant	MODIFIER	R04D3.2
419	X	14047344	C	A	upstream_gene_variant	MODIFIER	C04C11.14
420	III	1781711	A	G	upstream_gene_variant	MODIFIER	Y39A3CL.4
420	III	1790388	G	T	upstream_gene_variant	MODIFIER	Y39A3CL.9
420	III	2142819	C	G	upstream_gene_variant	MODIFIER	Y48G9A.17
420	III	3160098	C	T	downstream_gene_variant	MODIFIER	C44B11.1
420	III	3697501	G	T	upstream_gene_variant	MODIFIER	C14B1.2
420	III	3810247	G	T	upstream_gene_variant	MODIFIER	toh-1
420	III	7050376	C	T	upstream_gene_variant	MODIFIER	R01H2.7
420	III	10330884	G	C	upstream_gene_variant	MODIFIER	nex-2
420	III	11320040	A	G	upstream_gene_variant	MODIFIER	teg-1
420	III	12174664	A	G	missense_variant	MODERATE	gly-11
420	III	13268211	C	T	downstream_gene_variant	MODIFIER	F56A8.4
420	III	13268212	C	T	downstream_gene_variant	MODIFIER	F56A8.4
420	III	13579838	G	C	upstream_gene_variant	MODIFIER	T05D4.5
420	IV	1584583	T	G	missense_variant	MODERATE	npp-8
420	IV	1749087	G	A	upstream_gene_variant	MODIFIER	Y41D4A.6
420	IV	3585783	G	A	upstream_gene_variant	MODIFIER	Y37E11B.3
420	IV	7447612	G	A	upstream_gene_variant	MODIFIER	valv-1
420	IV	9541206	T	A	missense_variant	MODERATE	fbl-1
420	IV	11800722	G	T	downstream_gene_variant	MODIFIER	H01G02.13
420	IV	13058151	C	T	upstream_gene_variant	MODIFIER	F49E11.8
420	IV	13693892	A	T	upstream_gene_variant	MODIFIER	21ur-3987
420	IV	16202777	C	T	upstream_gene_variant	MODIFIER	21ur-107
420	IV	17476900	T	A	upstream_gene_variant	MODIFIER	F11E6.3
420	I	4167327	G	A	upstream_gene_variant	MODIFIER	sls-2.4
420	I	8857821	T	G	upstream_gene_variant	MODIFIER	ztf-26
420	I	9570442	T	G	upstream_gene_variant	MODIFIER	21ur-12607
420	I	10086571	C	A	missense_variant	MODERATE	scpl-1
420	I	12918900	G	A	synonymous_variant	LOW	fkb-2
420	I	13149158	G	A	upstream_gene_variant	MODIFIER	F22G12.3
420	II	27582	C	A	upstream_gene_variant	MODIFIER	C01B12.10
420	II	2462240	C	G	missense_variant	MODERATE	tsr-1
420	II	3230576	A	T	upstream_gene_variant	MODIFIER	ZC239.17
420	II	8504223	G	T	upstream_gene_variant	MODIFIER	T13H5.1
420	II	10186154	G	A	missense_variant	MODERATE	srd-2
420	II	13379003	C	T	downstream_gene_variant	MODIFIER	Y48C3A.20
420	V	64254	G	A	downstream_gene_variant	MODIFIER	cyp-29A3
420	V	2203379	C	T	missense_variant	MODERATE	cyp-33C12
420	V	4753238	G	A	synonymous_variant	LOW	C18G1.6
420	V	7033041	T	C	synonymous_variant	LOW	twk-11
420	V	11229526	A	T	upstream_gene_variant	MODIFIER	T19B10.3
420	V	13277453	C	T	missense_variant	MODERATE	uig-1
420	V	13684618	T	A	upstream_gene_variant	MODIFIER	F58G11.8
420	V	14477913	A	G	upstream_gene_variant	MODIFIER	clec-55
420	V	15200132	T	C	missense_variant	MODERATE	Y75B12B.10
420	V	18649925	A	C	upstream_gene_variant	MODIFIER	egas-2
420	V	20822622	T	C	upstream_gene_variant	MODIFIER	T03D8.6
420	X	381478	A	T	3_prime_UTR_variant	MODIFIER	ife-2
420	X	2316768	T	C	upstream_gene_variant	MODIFIER	T01B6.9
420	X	2530108	G	C	upstream_gene_variant	MODIFIER	R11B5.t3
420	X	10436332	A	T	upstream_gene_variant	MODIFIER	ZC504.10
420	X	12446216	A	G	upstream_gene_variant	MODIFIER	T18D3.6
420	X	13050970	C	T	upstream_gene_variant	MODIFIER	C53C7.t2
420	X	13212972	G	A	splice_acceptor_variant&intron_variant	HIGH	unc-9
420	X	14246462	T	C	synonymous_variant	LOW	mlc-6
420	X	17052017	C	A	downstream_gene_variant	MODIFIER	C30G4.4
423	III	1537247	C	A	upstream_gene_variant	MODIFIER	snf-6
423	III	1537257	A	T	upstream_gene_variant	MODIFIER	snf-6
423	III	1537268	A	G	upstream_gene_variant	MODIFIER	snf-6
423	III	3223806	C	T	upstream_gene_variant	MODIFIER	frm-8
423	III	4047982	A	T	upstream_gene_variant	MODIFIER	E03A3.1
423	III	4515884	A	T	upstream_gene_variant	MODIFIER	F25F2.6
423	III	10569764	T	C	downstream_gene_variant	MODIFIER	rab-30
423	III	13634427	G	T	upstream_gene_variant	MODIFIER	arrd-17
423	IV	1101918	G	T	missense_variant	MODERATE	Y55F3AR.1
423	IV	3270896	A	T	upstream_gene_variant	MODIFIER	clec-173
423	IV	3355298	A	T	downstream_gene_variant	MODIFIER	Y55H10A.3
423	IV	3370915	T	C	missense_variant	MODERATE	vha-19
423	IV	4000802	G	A	missense_variant	MODERATE	clec-78
423	IV	4161292	T	G	upstream_gene_variant	MODIFIER	scrm-5
423	IV	5372609	T	A	upstream_gene_variant	MODIFIER	21ur-8571
423	IV	5844204	C	G	3_prime_UTR_variant	MODIFIER	sams-4
423	IV	7633712	T	G	missense_variant	MODERATE	plp-1
423	IV	14688588	A	G	upstream_gene_variant	MODIFIER	21ur-994
423	I	675688	A	T	upstream_gene_variant	MODIFIER	Y18H1A.14
423	I	1269514	C	T	upstream_gene_variant	MODIFIER	grh-1
423	I	2841397	T	A	upstream_gene_variant	MODIFIER	W10C8.11
423	I	4852485	C	A	splice_region_variant&intron_variant	LOW	rga-6
423	I	5634713	G	A	intron_variant	MODIFIER	F46F11.1
423	I	8499328	C	T	synonymous_variant	LOW	ceh-6
423	I	9967680	C	T	downstream_gene_variant	MODIFIER	T24D1.6
423	I	12807158	C	A	upstream_gene_variant	MODIFIER	attf-6
423	I	14496728	C	T	upstream_gene_variant	MODIFIER	Y105E8A.20
423	II	3205999	A	C	upstream_gene_variant	MODIFIER	sri-53
423	II	3206001	C	T	upstream_gene_variant	MODIFIER	sri-53
423	II	7242376	A	C	upstream_gene_variant	MODIFIER	aqp-1
423	II	7768419	C	T	upstream_gene_variant	MODIFIER	B0228.9
423	II	8196773	A	T	upstream_gene_variant	MODIFIER	T05C12.9
423	II	10609848	C	A	upstream_gene_variant	MODIFIER	taf-13
423	II	11910447	A	T	upstream_gene_variant	MODIFIER	ZK930.7
423	II	12723132	C	T	downstream_gene_variant	MODIFIER	snrp-200
423	II	13187477	A	T	upstream_gene_variant	MODIFIER	mir-4933
423	II	13452280	A	T	upstream_gene_variant	MODIFIER	tbc-14
423	V	1026726	A	G	upstream_gene_variant	MODIFIER	R09A1.2
423	V	1662192	A	G	upstream_gene_variant	MODIFIER	K04F1.1
423	V	1845397	A	G	upstream_gene_variant	MODIFIER	T10B5.7
423	V	4368895	G	T	upstream_gene_variant	MODIFIER	grl-13
423	V	8432714	C	T	upstream_gene_variant	MODIFIER	lmd-3
423	V	9871236	C	A	missense_variant	MODERATE	srab-18
423	V	12729537	G	C	missense_variant	MODERATE	R11D1.10
423	V	15582378	A	T	upstream_gene_variant	MODIFIER	F28F8.9
423	V	18047320	G	A	downstream_gene_variant	MODIFIER	prp-6
423	X	272897	A	T	upstream_gene_variant	MODIFIER	math-43
423	X	591590	C	T	upstream_gene_variant	MODIFIER	mrp-1
423	X	2152483	T	C	upstream_gene_variant	MODIFIER	npax-2
423	X	5277750	T	C	upstream_gene_variant	MODIFIER	Y34B4A.8
423	X	6674846	T	A	upstream_gene_variant	MODIFIER	F38B6.4
423	X	8844378	G	T	upstream_gene_variant	MODIFIER	C28G1.7
423	X	14208993	T	A	upstream_gene_variant	MODIFIER	K06G5.9
423	X	15376762	G	A	upstream_gene_variant	MODIFIER	F47C8.4
423	X	15524820	C	T	upstream_gene_variant	MODIFIER	H30A04.10
425	III	3754609	T	A	splice_region_variant&synonymous_variant	LOW	F34D10.6
425	III	3754610	C	A	missense_variant&splice_region_variant	MODERATE	F34D10.6
425	III	5621213	A	G	upstream_gene_variant	MODIFIER	C05D2.13
425	III	10014192	A	T	upstream_gene_variant	MODIFIER	fbxa-155
425	III	10912097	T	A	downstream_gene_variant	MODIFIER	unc-119
425	III	12135972	G	A	downstream_gene_variant	MODIFIER	Y75B8A.50
425	IV	808995	T	G	upstream_gene_variant	MODIFIER	Y55F3BL.6
425	IV	2289966	G	A	intron_variant	MODIFIER	lin-1
425	IV	4534274	A	T	upstream_gene_variant	MODIFIER	ZK185.3
425	IV	5364910	C	G	splice_region_variant&intron_variant	LOW	F41H10.4
425	IV	7393861	T	A	upstream_gene_variant	MODIFIER	T12B3.4
425	IV	10291121	G	A	missense_variant	MODERATE	ebax-1
425	IV	12570597	T	C	3_prime_UTR_variant	MODIFIER	let-99
425	IV	14113144	G	C	missense_variant	MODERATE	nkcc-1
425	IV	15054664	G	A	upstream_gene_variant	MODIFIER	srt-47
425	IV	15728167	G	A	upstream_gene_variant	MODIFIER	21ur-4809
425	IV	16873960	C	A	upstream_gene_variant	MODIFIER	T06A10.106
425	I	4728305	G	A	splice_donor_variant&intron_variant	HIGH	ugt-28
425	I	7309300	G	C	missense_variant	MODERATE	eat-5
425	I	10154648	A	G	upstream_gene_variant	MODIFIER	F16C3.3
425	I	12508664	G	A	missense_variant	MODERATE	unc-101
425	I	12720207	G	A	upstream_gene_variant	MODIFIER	T06G6.8
425	I	14144445	T	A	upstream_gene_variant	MODIFIER	kal-1
425	II	1305072	A	T	missense_variant	MODERATE	emc-2
425	II	4105715	A	T	upstream_gene_variant	MODIFIER	T08H4.7
425	II	7584176	A	T	upstream_gene_variant	MODIFIER	mks-3
425	II	8739158	A	G	upstream_gene_variant	MODIFIER	T01B7.8
425	II	12944668	C	T	synonymous_variant	LOW	F58G1.7
425	V	325191	C	T	missense_variant	MODERATE	abt-4
425	V	325196	G	T	missense_variant	MODERATE	abt-4
425	V	784582	G	A	missense_variant	MODERATE	srab-16
425	V	6401154	C	G	upstream_gene_variant	MODIFIER	gfi-1
425	V	8624185	T	C	upstream_gene_variant	MODIFIER	F41E6.11
425	V	10092859	G	A	upstream_gene_variant	MODIFIER	R04B5.7
425	V	13286994	A	G	upstream_gene_variant	MODIFIER	C26E1.6
425	V	14441562	A	T	upstream_gene_variant	MODIFIER	F23B12.4
425	V	14553526	A	T	downstream_gene_variant	MODIFIER	srg-47
425	V	15757915	G	A	upstream_gene_variant	MODIFIER	str-9
425	V	16045688	C	A	upstream_gene_variant	MODIFIER	his-2
425	V	16254164	A	G	3_prime_UTR_variant	MODIFIER	F21H7.10
425	X	1927087	G	T	missense_variant	MODERATE	ZC53.4
425	X	2066598	T	C	3_prime_UTR_variant	MODIFIER	acl-4
425	X	3682023	C	T	upstream_gene_variant	MODIFIER	tag-52
425	X	4392772	T	G	upstream_gene_variant	MODIFIER	R160.8
425	X	6982153	G	T	missense_variant	MODERATE	F01E11.17
425	X	8064081	G	T	upstream_gene_variant	MODIFIER	21ur-14097
425	X	8886078	A	T	upstream_gene_variant	MODIFIER	C06E2.12
425	X	11689646	C	T	upstream_gene_variant	MODIFIER	C44C10.7
425	X	11689666	C	A	upstream_gene_variant	MODIFIER	C44C10.7
425	X	13111795	C	T	upstream_gene_variant	MODIFIER	21ur-15153
425	X	14314553	G	T	missense_variant	MODERATE	prx-1
426	III	512016	G	A	5_prime_UTR_variant	MODIFIER	F30H5.3
426	III	2272360	G	A	upstream_gene_variant	MODIFIER	fbxa-48
426	III	8102837	A	T	upstream_gene_variant	MODIFIER	K06H7.8
426	III	9114036	A	G	upstream_gene_variant	MODIFIER	cya-1
426	III	9476341	T	C	upstream_gene_variant	MODIFIER	bre-3
426	III	10133756	C	A	upstream_gene_variant	MODIFIER	ZK1128.7
426	III	10449220	A	T	downstream_gene_variant	MODIFIER	H04D03.3
426	III	10478480	T	G	upstream_gene_variant	MODIFIER	D2045.7
426	IV	2163906	T	A	upstream_gene_variant	MODIFIER	gcy-37
426	IV	2929754	G	C	upstream_gene_variant	MODIFIER	ubc-13
426	IV	2963345	A	T	downstream_gene_variant	MODIFIER	lad-2
426	IV	3151882	C	A	downstream_gene_variant	MODIFIER	21ur-12174
426	IV	5796564	G	A	missense_variant&splice_region_variant	MODERATE	C31H1.5
426	IV	6552166	T	A	upstream_gene_variant	MODIFIER	C43G2.t1
426	IV	7116945	T	A	downstream_gene_variant	MODIFIER	ssq-3
426	IV	9903298	T	C	upstream_gene_variant	MODIFIER	F32B6.14
426	IV	10490196	A	T	downstream_gene_variant	MODIFIER	tax-6
426	IV	14078626	G	T	upstream_gene_variant	MODIFIER	F52B11.2
426	IV	15608186	A	T	upstream_gene_variant	MODIFIER	Y105C5A.t2
426	I	2753841	T	A	upstream_gene_variant	MODIFIER	Y71F9B.20
426	I	2753842	C	A	upstream_gene_variant	MODIFIER	Y71F9B.20
426	I	2753849	G	A	upstream_gene_variant	MODIFIER	Y71F9B.20
426	I	2989074	A	G	upstream_gene_variant	MODIFIER	Y71F9AR.2
426	I	5831981	A	T	upstream_gene_variant	MODIFIER	obr-4
426	I	5839548	A	G	upstream_gene_variant	MODIFIER	twk-47
426	I	9195009	T	A	upstream_gene_variant	MODIFIER	lim-9
426	I	10647896	C	T	upstream_gene_variant	MODIFIER	B0511.2
426	I	12543653	T	C	upstream_gene_variant	MODIFIER	W02D9.4
426	I	12668742	C	A	3_prime_UTR_variant	MODIFIER	T26E3.4
426	II	1142828	A	G	upstream_gene_variant	MODIFIER	W09B6.5
426	II	2714900	T	C	3_prime_UTR_variant	MODIFIER	T05A8.3
426	II	4033446	G	A	upstream_gene_variant	MODIFIER	K07D4.4
426	II	6259403	C	T	missense_variant	MODERATE	F13H8.11
426	II	6700208	G	C	missense_variant	MODERATE	C18H9.1
426	II	8921251	G	A	upstream_gene_variant	MODIFIER	B0457.6
426	II	12971936	A	G	upstream_gene_variant	MODIFIER	Y38F1A.4
426	II	13225513	C	T	intergenic_region	MODIFIER	F15D4.2-flp-16
426	II	13225515	G	A	intergenic_region	MODIFIER	F15D4.2-flp-16
426	V	1943396	C	A	upstream_gene_variant	MODIFIER	glb-25
426	V	3841451	G	A	upstream_gene_variant	MODIFIER	H10D18.6
426	V	7114129	G	A	missense_variant	MODERATE	odr-2
426	V	12614474	G	A	upstream_gene_variant	MODIFIER	cyc-2.2
426	V	13250230	A	T	upstream_gene_variant	MODIFIER	odr-3
426	V	13966515	T	G	upstream_gene_variant	MODIFIER	hpo-17
426	V	16565783	G	A	upstream_gene_variant	MODIFIER	Y32B12B.t2
426	V	17495881	A	C	missense_variant	MODERATE	srh-118
426	V	17495886	A	C	missense_variant	MODERATE	srh-118
426	X	2796725	C	T	downstream_gene_variant	MODIFIER	C14A11.14
426	X	4880508	G	C	upstream_gene_variant	MODIFIER	T07F12.9
426	X	5804281	G	A	upstream_gene_variant	MODIFIER	F46G11.19
426	X	6357369	A	G	missense_variant	MODERATE	C03B1.5
426	X	8232265	A	T	3_prime_UTR_variant	MODIFIER	M60.4
426	X	9819843	T	G	missense_variant	MODERATE	dpy-22
426	X	10768480	T	C	upstream_gene_variant	MODIFIER	T05A10.8
426	X	12633307	A	T	upstream_gene_variant	MODIFIER	tag-147
426	X	15442474	C	T	synonymous_variant	LOW	nkat-3
428	III	998855	C	T	missense_variant	MODERATE	trp-2
428	III	2641323	T	A	upstream_gene_variant	MODIFIER	H19M22.8
428	III	4201156	T	G	upstream_gene_variant	MODIFIER	R74.9
428	III	4835809	T	A	upstream_gene_variant	MODIFIER	acbp-7
428	III	6188389	C	T	upstream_gene_variant	MODIFIER	C23G10.12
428	III	12309480	G	C	upstream_gene_variant	MODIFIER	Y75B8A.39
428	III	12379183	A	T	upstream_gene_variant	MODIFIER	pph-4.2
428	III	13545478	A	G	3_prime_UTR_variant	MODIFIER	Y76A2B.4
428	IV	1902114	G	A	upstream_gene_variant	MODIFIER	F55A8.6
428	IV	2856214	T	A	upstream_gene_variant	MODIFIER	Y54G2A.49
428	IV	3515084	A	T	upstream_gene_variant	MODIFIER	tsg-101
428	IV	3762457	T	A	downstream_gene_variant	MODIFIER	best-20
428	IV	3877970	T	G	upstream_gene_variant	MODIFIER	F37C4.5
428	IV	6390292	A	G	upstream_gene_variant	MODIFIER	21ur-7339
428	IV	7460430	A	T	upstream_gene_variant	MODIFIER	F13B6.2
428	IV	14490223	T	A	upstream_gene_variant	MODIFIER	21ur-5971
428	I	724746	T	C	missense_variant	MODERATE	pif-1
428	I	3646058	C	T	downstream_gene_variant	MODIFIER	T28F2.1
428	I	4092576	T	G	upstream_gene_variant	MODIFIER	acd-2
428	I	11604510	T	C	upstream_gene_variant	MODIFIER	C17D12.8
428	I	12930122	G	C	upstream_gene_variant	MODIFIER	Y18D10A.22
428	I	13244577	G	A	synonymous_variant	LOW	ZK1053.4
428	II	5467291	A	T	upstream_gene_variant	MODIFIER	F56D1.11
428	II	5681470	T	C	upstream_gene_variant	MODIFIER	C25H3.8
428	II	7538794	C	T	missense_variant	MODERATE	nfi-1
428	II	9696440	T	C	upstream_gene_variant	MODIFIER	nlp-11
428	II	12898932	G	T	upstream_gene_variant	MODIFIER	clec-62
428	MtDNA	4555	T	A	missense_variant	MODERATE	ctb-1
428	V	1259914	C	A	upstream_gene_variant	MODIFIER	C39F7.1
428	V	6292780	C	T	upstream_gene_variant	MODIFIER	K12B6.9
428	V	6919674	A	T	upstream_gene_variant	MODIFIER	K11C4.9
428	V	8672462	C	A	upstream_gene_variant	MODIFIER	ZC190.11
428	V	9031279	C	A	missense_variant	MODERATE	C25E10.5
428	V	9608902	T	A	downstream_gene_variant	MODIFIER	K09G1.5
428	V	10287677	T	A	synonymous_variant	LOW	B0024.3
428	V	10602273	A	T	upstream_gene_variant	MODIFIER	T21C9.16
428	V	10909111	C	T	missense_variant	MODERATE	F32D8.10
428	V	11079153	A	G	upstream_gene_variant	MODIFIER	T04C12.15
428	V	16576852	T	A	downstream_gene_variant	MODIFIER	str-149
428	V	16689722	A	G	synonymous_variant	LOW	srz-102
428	V	16689723	T	C	synonymous_variant	LOW	srz-102
428	V	16689725	G	A	synonymous_variant	LOW	srz-102
428	V	16689731	T	C	synonymous_variant	LOW	srz-102
428	V	16689734	T	G	missense_variant	MODERATE	srz-102
428	V	16689744	G	A	missense_variant	MODERATE	srz-102
428	V	16689759	G	A	missense_variant	MODERATE	srz-102
428	V	16689782	A	C	synonymous_variant	LOW	srz-102
428	V	16689792	G	T	missense_variant	MODERATE	srz-102
428	V	16728843	A	T	upstream_gene_variant	MODIFIER	nhr-112
428	V	18127263	T	A	upstream_gene_variant	MODIFIER	fbxa-211
428	X	1069674	G	T	upstream_gene_variant	MODIFIER	mksr-1
428	X	1369243	A	T	upstream_gene_variant	MODIFIER	dgn-2
428	X	2525778	T	G	missense_variant	MODERATE	tbc-12
428	X	3689504	A	G	upstream_gene_variant	MODIFIER	tag-278
428	X	4951744	G	T	upstream_gene_variant	MODIFIER	M03F4.9
428	X	8508530	C	T	upstream_gene_variant	MODIFIER	H03E18.3
428	X	8516115	C	T	upstream_gene_variant	MODIFIER	H03E18.6
428	X	13822712	C	T	upstream_gene_variant	MODIFIER	F19D8.5
428	X	14366705	C	A	upstream_gene_variant	MODIFIER	21ur-15702
428	X	15384336	A	C	upstream_gene_variant	MODIFIER	F47C8.7
429	III	1438810	C	G	upstream_gene_variant	MODIFIER	Y82E9BR.2
429	III	1868341	C	T	upstream_gene_variant	MODIFIER	Y39A3CR.3
429	III	1868346	G	C	upstream_gene_variant	MODIFIER	Y39A3CR.3
429	III	4173868	C	T	synonymous_variant	LOW	hrde-1
429	III	4173884	T	C	missense_variant	MODERATE	hrde-1
429	III	4173885	G	C	missense_variant	MODERATE	hrde-1
429	III	8084083	C	T	missense_variant	MODERATE	K06H7.7
429	III	8226953	C	T	stop_gained	HIGH	rfs-1
429	III	9031950	C	A	upstream_gene_variant	MODIFIER	F59B2.13
429	III	10218368	T	C	missense_variant	MODERATE	rde-4
429	III	11494459	G	A	upstream_gene_variant	MODIFIER	nars-2
429	III	11535152	C	T	downstream_gene_variant	MODIFIER	xpb-1
429	III	12297571	A	G	upstream_gene_variant	MODIFIER	Y75B8A.53
429	IV	2029864	A	T	intron_variant	MODIFIER	cpsf-1
429	IV	2481410	A	T	upstream_gene_variant	MODIFIER	C24E9.1
429	IV	2683059	G	T	missense_variant	MODERATE	egrh-3
429	IV	4693990	G	A	missense_variant	MODERATE	T22B11.1
429	IV	6462050	A	G	upstream_gene_variant	MODIFIER	lgc-10
429	IV	7995708	T	A	downstream_gene_variant	MODIFIER	col-115
429	IV	9328795	G	T	upstream_gene_variant	MODIFIER	F49C12.14
429	IV	10940935	C	T	upstream_gene_variant	MODIFIER	ZK593.9
429	IV	15147781	A	G	upstream_gene_variant	MODIFIER	21ur-678
429	IV	15268929	A	T	3_prime_UTR_variant	MODIFIER	Y73F8A.5
429	IV	15761576	C	G	upstream_gene_variant	MODIFIER	21ur-302
429	I	1085976	C	A	upstream_gene_variant	MODIFIER	R06A10.5
429	I	2235420	T	G	upstream_gene_variant	MODIFIER	gcy-17
429	I	3254873	T	A	upstream_gene_variant	MODIFIER	Y54E10A.28
429	I	3756160	C	T	upstream_gene_variant	MODIFIER	inx-13
429	I	4498952	A	T	upstream_gene_variant	MODIFIER	T01A4.8
429	I	8974391	G	C	missense_variant	MODERATE	F32H2.12
429	I	9384981	T	A	upstream_gene_variant	MODIFIER	mir-71
429	I	13792527	A	T	upstream_gene_variant	MODIFIER	Y37H9A.4
429	II	1163029	G	T	upstream_gene_variant	MODIFIER	T23F4.2
429	II	4282323	G	A	3_prime_UTR_variant	MODIFIER	C01F1.6
429	II	5513010	A	G	upstream_gene_variant	MODIFIER	ZK177.3
429	II	5744844	C	T	upstream_gene_variant	MODIFIER	C18A3.21
429	II	9854152	T	C	synonymous_variant	LOW	chil-4
429	II	9952974	T	C	upstream_gene_variant	MODIFIER	egl-43
429	II	10459094	G	T	upstream_gene_variant	MODIFIER	ZK673.5
429	II	10492136	G	A	missense_variant	MODERATE	ZK666.8
429	II	11784520	C	T	upstream_gene_variant	MODIFIER	F43G6.16
429	II	12336435	C	T	upstream_gene_variant	MODIFIER	sop-2
429	II	13837472	T	G	upstream_gene_variant	MODIFIER	F08G2.5
429	V	1644879	G	C	missense_variant	MODERATE	alh-2
429	V	2106530	C	A	synonymous_variant	LOW	ckb-4
429	V	2696482	T	A	upstream_gene_variant	MODIFIER	Y45G12B.3
429	V	5607151	G	T	upstream_gene_variant	MODIFIER	CD4.15
429	V	9283361	T	G	upstream_gene_variant	MODIFIER	hlh-10
429	V	10965127	C	A	missense_variant	MODERATE	F17C11.10
429	V	12646485	A	T	missense_variant	MODERATE	F56H9.8
429	V	15505373	G	A	upstream_gene_variant	MODIFIER	C06B8.t3
429	V	15660002	T	A	upstream_gene_variant	MODIFIER	F53E4.1
429	V	16298234	G	A	missense_variant	MODERATE	srbc-83
429	V	17221924	A	G	upstream_gene_variant	MODIFIER	srh-109
429	V	18019553	A	C	upstream_gene_variant	MODIFIER	srh-134
429	V	18355110	C	A	missense_variant	MODERATE	C08E8.2
429	V	18903663	T	A	upstream_gene_variant	MODIFIER	nhr-243
429	V	19312596	A	G	upstream_gene_variant	MODIFIER	C43D7.10
429	X	1218822	C	G	intron_variant	MODIFIER	C46H3.2
429	X	3731205	C	G	downstream_gene_variant	MODIFIER	nlp-1
429	X	4747892	G	A	intron_variant	MODIFIER	lon-2
429	X	4859328	C	A	upstream_gene_variant	MODIFIER	F39C12.6
429	X	5221539	T	A	downstream_gene_variant	MODIFIER	H28G03.1
429	X	5736502	A	G	upstream_gene_variant	MODIFIER	C41G11.10
429	X	6467506	T	C	synonymous_variant	LOW	C15B12.3
429	X	14527501	A	G	missense_variant	MODERATE	nspc-18
429	X	15523492	A	C	3_prime_UTR_variant	MODIFIER	eat-20
429	X	17500939	A	G	intergenic_region	MODIFIER	npr-24-nhr-1
430	III	69796	A	C	5_prime_UTR_premature_start_codon_gain_variant	LOW	spt-4
430	III	202092	A	T	intron_variant	MODIFIER	F40G9.17
430	III	7758210	A	G	upstream_gene_variant	MODIFIER	cdh-3
430	III	10080624	A	T	upstream_gene_variant	MODIFIER	T16G12.9
430	IV	8990199	T	A	upstream_gene_variant	MODIFIER	21ur-14792
430	IV	13918661	A	T	upstream_gene_variant	MODIFIER	21ur-6953
430	IV	14271899	T	A	upstream_gene_variant	MODIFIER	21ur-6200
430	IV	15497096	C	G	upstream_gene_variant	MODIFIER	21ur-4627
430	IV	15935756	C	T	upstream_gene_variant	MODIFIER	Y105C5B.t4
430	IV	15971041	A	T	upstream_gene_variant	MODIFIER	21ur-11309
430	I	55655	G	C	downstream_gene_variant	MODIFIER	pgs-1
430	I	5054525	A	G	upstream_gene_variant	MODIFIER	C46H11.1
430	I	5476819	T	C	downstream_gene_variant	MODIFIER	C09D4.4
430	I	5891265	C	G	intron_variant	MODIFIER	pgp-2
430	I	8033571	G	A	missense_variant	MODERATE	cdc-48.3
430	I	12775659	A	T	intron_variant	MODIFIER	B0019.2
430	I	14117368	T	A	missense_variant	MODERATE	Y63D3A.8
430	II	1553009	G	A	upstream_gene_variant	MODIFIER	fbxb-52
430	II	9220786	T	A	upstream_gene_variant	MODIFIER	ZK1067.3
430	II	9934503	A	G	3_prime_UTR_variant	MODIFIER	C05C10.3
430	II	10797198	C	T	upstream_gene_variant	MODIFIER	vps-11
430	II	12628322	C	A	upstream_gene_variant	MODIFIER	Y38E10A.14
430	V	806669	G	A	upstream_gene_variant	MODIFIER	nhr-270
430	V	1250951	A	G	intergenic_region	MODIFIER	C39F7.6-C39F7.1
430	V	4913506	G	A	upstream_gene_variant	MODIFIER	H23N18.5
430	V	7846134	G	A	missense_variant	MODERATE	tag-253
430	V	10964907	T	A	missense_variant	MODERATE	F17C11.10
430	V	12527620	G	C	upstream_gene_variant	MODIFIER	C13C12.2
430	V	13915982	G	A	upstream_gene_variant	MODIFIER	gcy-32
430	V	14711897	C	A	upstream_gene_variant	MODIFIER	R08A2.8
430	V	16435669	G	T	upstream_gene_variant	MODIFIER	clec-234
430	V	16868974	A	C	upstream_gene_variant	MODIFIER	srw-23
430	X	751669	C	A	downstream_gene_variant	MODIFIER	C02H7.4
430	X	751671	C	A	downstream_gene_variant	MODIFIER	C02H7.4
430	X	999348	A	T	upstream_gene_variant	MODIFIER	cutl-21
430	X	1051442	A	T	upstream_gene_variant	MODIFIER	ncs-3
430	X	1881029	A	G	upstream_gene_variant	MODIFIER	Y59E1B.t2
430	X	2608519	G	T	missense_variant&splice_region_variant	MODERATE	T03G6.1
430	X	2646264	A	T	downstream_gene_variant	MODIFIER	C09B7.5
430	X	4628536	C	T	upstream_gene_variant	MODIFIER	C46C11.3
430	X	7692848	G	T	missense_variant	MODERATE	kvs-1
430	X	8561355	A	T	missense_variant	MODERATE	utx-1
430	X	12381486	G	C	upstream_gene_variant	MODIFIER	glb-13
430	X	13907028	C	T	upstream_gene_variant	MODIFIER	sra-39
432	III	1841983	T	A	intron_variant	MODIFIER	Y39A3CL.1
432	III	2991106	C	T	upstream_gene_variant	MODIFIER	Y55D5A.4
432	III	5847403	G	A	downstream_gene_variant	MODIFIER	ddx-23
432	III	6189595	T	G	upstream_gene_variant	MODIFIER	C23G10.12
432	III	9205278	C	A	missense_variant	MODERATE	ZC84.1
432	III	10003193	A	G	3_prime_UTR_variant	MODIFIER	C05B5.5
432	III	10194565	T	C	missense_variant	MODERATE	epac-1
432	III	10207168	A	G	missense_variant	MODERATE	chc-1
432	III	11584447	T	C	upstream_gene_variant	MODIFIER	Y66D12A.7
432	III	13215631	C	T	downstream_gene_variant	MODIFIER	tsp-3
432	IV	4541465	C	A	splice_region_variant&intron_variant	LOW	ZK185.2
432	IV	5908668	A	C	upstream_gene_variant	MODIFIER	21ur-4177
432	IV	10283303	A	G	splice_region_variant&intron_variant	LOW	rad-51
432	IV	11496032	T	G	upstream_gene_variant	MODIFIER	H21P03.8
432	IV	13096318	C	G	missense_variant	MODERATE	rfc-3
432	IV	16185548	C	T	upstream_gene_variant	MODIFIER	21ur-13200
432	I	2434478	G	A	synonymous_variant	LOW	ubxn-1
432	I	2789107	G	T	missense_variant	MODERATE	W03D8.1
432	I	3447150	C	A	upstream_gene_variant	MODIFIER	Y47G6A.13
432	I	3447152	T	G	upstream_gene_variant	MODIFIER	Y47G6A.13
432	I	4572188	G	A	missense_variant	MODERATE	col-52
432	I	5792003	A	T	upstream_gene_variant	MODIFIER	cpb-3
432	I	11533532	C	G	missense_variant	MODERATE	dys-1
432	I	11714750	G	A	upstream_gene_variant	MODIFIER	oac-19
432	I	13742581	T	A	upstream_gene_variant	MODIFIER	Y6B3B.7
432	II	1516298	C	T	upstream_gene_variant	MODIFIER	Y51H7BR.8
432	II	1605666	G	A	synonymous_variant	LOW	bath-33
432	II	2346926	G	A	upstream_gene_variant	MODIFIER	F43C11.14
432	II	4977757	T	A	upstream_gene_variant	MODIFIER	T27F7.6
432	II	10040616	A	G	upstream_gene_variant	MODIFIER	let-268
432	II	12424074	G	C	missense_variant	MODERATE	daf-22
432	II	13735115	C	T	upstream_gene_variant	MODIFIER	Y54G9A.16
432	II	14143121	G	T	missense_variant	MODERATE	W03H9.2
432	II	14456263	T	A	upstream_gene_variant	MODIFIER	21ur-12471
432	V	1348069	T	C	upstream_gene_variant	MODIFIER	glb-33
432	V	1755000	C	A	upstream_gene_variant	MODIFIER	srh-199
432	V	2887905	C	A	upstream_gene_variant	MODIFIER	F37B4.15
432	V	3989000	G	T	upstream_gene_variant	MODIFIER	nlp-27
432	V	5654783	C	A	downstream_gene_variant	MODIFIER	C14C11.4
432	V	5730810	A	C	upstream_gene_variant	MODIFIER	K09H11.4
432	V	7678031	C	A	downstream_gene_variant	MODIFIER	C12D5.4
432	V	12260127	T	A	missense_variant	MODERATE	ugt-56
432	V	17019074	A	G	missense_variant	MODERATE	srh-97
432	X	406295	A	T	upstream_gene_variant	MODIFIER	R04A9.t1
432	X	2873433	G	A	missense_variant	MODERATE	F53B3.5
432	X	4716849	T	C	splice_region_variant&intron_variant	LOW	F55D10.4
432	X	7324002	G	A	upstream_gene_variant	MODIFIER	spp-5
432	X	10480061	G	A	upstream_gene_variant	MODIFIER	C33D3.6
432	X	10480062	T	A	upstream_gene_variant	MODIFIER	C33D3.6
432	X	12812694	C	A	upstream_gene_variant	MODIFIER	nhr-27
432	X	13397477	C	T	missense_variant	MODERATE	F02C12.3
432	X	14156909	C	G	synonymous_variant	LOW	ceh-90
432	X	15152925	G	A	upstream_gene_variant	MODIFIER	C11G10.12
435	III	1768209	G	C	upstream_gene_variant	MODIFIER	Y46E12A.6
435	III	2746790	G	A	upstream_gene_variant	MODIFIER	Y71H2AM.14
435	III	7935189	A	C	upstream_gene_variant	MODIFIER	C29E4.10
435	III	9165819	C	T	stop_gained	HIGH	dgk-3
435	III	11375984	A	G	missense_variant	MODERATE	dpy-18
435	IV	1230450	C	G	missense_variant	MODERATE	W09G12.7
435	IV	4786509	T	A	upstream_gene_variant	MODIFIER	21ur-9743
435	IV	5348009	T	C	upstream_gene_variant	MODIFIER	21ur-5375
435	IV	7397142	T	A	3_prime_UTR_variant	MODIFIER	pitr-1
435	IV	8568907	A	T	upstream_gene_variant	MODIFIER	mpst-6
435	IV	10104347	C	T	downstream_gene_variant	MODIFIER	egl-38
435	IV	14195888	G	A	synonymous_variant	LOW	K01G12.3
435	IV	15033439	G	T	upstream_gene_variant	MODIFIER	Y41E3.8
435	I	2484331	C	G	upstream_gene_variant	MODIFIER	eif-3.I
435	I	3229123	A	T	upstream_gene_variant	MODIFIER	cdt-1
435	I	3229124	C	A	upstream_gene_variant	MODIFIER	cdt-1
435	I	4233154	T	A	stop_gained	HIGH	nab-1
435	I	5816622	C	T	missense_variant	MODERATE	hmg-3
435	I	10057169	C	T	intron_variant	MODIFIER	F10G8.8
435	II	2219550	C	A	upstream_gene_variant	MODIFIER	F54A3.10
435	II	2219551	A	T	upstream_gene_variant	MODIFIER	F54A3.10
435	II	6178587	G	A	upstream_gene_variant	MODIFIER	F40H3.12
435	II	7550176	G	C	missense_variant	MODERATE	tph-1
435	II	8833909	G	T	upstream_gene_variant	MODIFIER	F46C5.2
435	V	812054	C	T	upstream_gene_variant	MODIFIER	R13D11.3
435	V	2875265	A	T	downstream_gene_variant	MODIFIER	srh-243
435	V	5172553	C	T	upstream_gene_variant	MODIFIER	srt-64
435	V	12377162	G	T	upstream_gene_variant	MODIFIER	F23H12.10
435	V	12952143	C	G	upstream_gene_variant	MODIFIER	T16G1.9
435	V	14831041	C	A	5_prime_UTR_variant	MODIFIER	ret-1
435	V	17478213	A	T	downstream_gene_variant	MODIFIER	srh-114
435	V	18239084	T	A	upstream_gene_variant	MODIFIER	R10E8.3
435	X	1221416	G	T	upstream_gene_variant	MODIFIER	C46H3.2
435	X	2944671	A	C	3_prime_UTR_variant	MODIFIER	pfk-1.1
435	X	5609677	C	T	missense_variant	MODERATE	octr-1
435	X	9472621	G	C	splice_donor_variant&intron_variant	HIGH	gap-2
435	X	15520269	G	A	upstream_gene_variant	MODIFIER	H30A04.5
435	X	16481737	T	G	upstream_gene_variant	MODIFIER	21ur-14875
435	X	16481741	C	T	upstream_gene_variant	MODIFIER	21ur-14875
435	X	16829611	G	A	downstream_gene_variant	MODIFIER	F41G4.4
436	III	1115178	T	A	upstream_gene_variant	MODIFIER	Y71D11A.3
436	III	1571050	G	C	upstream_gene_variant	MODIFIER	Y67D2.8
436	III	1995550	G	A	upstream_gene_variant	MODIFIER	lgc-42
436	III	3502085	A	T	upstream_gene_variant	MODIFIER	M01F1.9
436	III	3588287	T	A	upstream_gene_variant	MODIFIER	C48D5.7
436	III	8636510	T	G	upstream_gene_variant	MODIFIER	F22B7.t1
436	III	10217623	A	G	missense_variant	MODERATE	rde-4
436	III	11370322	G	A	upstream_gene_variant	MODIFIER	T28D6.13
436	III	12174550	G	C	downstream_gene_variant	MODIFIER	Y75B8A.8
436	IV	78653	A	T	upstream_gene_variant	MODIFIER	T05C7.9
436	IV	3019915	C	T	missense_variant	MODERATE	lin-22
436	IV	3155593	G	T	intron_variant	MODIFIER	T23E1.1
436	IV	3155594	G	T	intron_variant	MODIFIER	T23E1.1
436	IV	3881379	C	A	upstream_gene_variant	MODIFIER	F37C4.6
436	IV	8437905	A	T	3_prime_UTR_variant	MODIFIER	T26A8.1
436	IV	8836672	G	A	synonymous_variant	LOW	T28C6.7
436	IV	12761570	A	G	upstream_gene_variant	MODIFIER	flp-9
436	IV	13725699	A	T	upstream_gene_variant	MODIFIER	21ur-9560
436	IV	14574077	A	C	missense_variant	MODERATE	Y57G11B.3
436	IV	14751471	A	C	upstream_gene_variant	MODIFIER	21ur-7272
436	IV	15340487	A	G	upstream_gene_variant	MODIFIER	21ur-2333
436	I	4196589	C	T	missense_variant	MODERATE	C18E3.5
436	I	8781157	C	T	missense_variant	MODERATE	DY3.t2
436	I	11174985	T	G	upstream_gene_variant	MODIFIER	F28D9.5
436	I	11174986	T	A	upstream_gene_variant	MODIFIER	F28D9.5
436	I	14010982	C	T	missense_variant	MODERATE	ZC334.7
436	II	1463364	G	A	missense_variant	MODERATE	Y51H7C.13
436	II	1706393	G	C	synonymous_variant	LOW	sdz-18
436	II	11071618	T	A	upstream_gene_variant	MODIFIER	C09H10.16
436	II	11271640	A	T	upstream_gene_variant	MODIFIER	C47G2.17
436	II	11523647	C	T	missense_variant	MODERATE	age-1
436	II	14003038	C	T	upstream_gene_variant	MODIFIER	F01D5.2
436	II	14593523	C	T	upstream_gene_variant	MODIFIER	C01G12.7
436	V	2892800	A	G	upstream_gene_variant	MODIFIER	srw-4
436	V	3239573	C	T	synonymous_variant	LOW	str-16
436	V	6478770	C	G	upstream_gene_variant	MODIFIER	W01A11.17
436	V	10766049	A	C	upstream_gene_variant	MODIFIER	sre-6
436	V	11815976	T	A	upstream_gene_variant	MODIFIER	D2023.3
436	V	12248680	T	C	missense_variant	MODERATE	rad-50
436	V	12260712	T	C	synonymous_variant	LOW	ugt-56
436	V	12553564	A	T	upstream_gene_variant	MODIFIER	F45D3.3
436	V	14011759	A	G	upstream_gene_variant	MODIFIER	aip-1
436	V	14674136	A	C	upstream_gene_variant	MODIFIER	C47E8.14
436	V	14824838	G	T	upstream_gene_variant	MODIFIER	W06A7.10
436	V	16349650	G	C	synonymous_variant	LOW	W08G11.1
436	V	20083647	T	C	upstream_gene_variant	MODIFIER	Y113G7A.20
436	X	1200881	A	G	upstream_gene_variant	MODIFIER	T13G4.5
436	X	5150901	G	T	upstream_gene_variant	MODIFIER	dpy-8
436	X	5598106	A	T	splice_region_variant&intron_variant	LOW	sulp-2
436	X	9091442	C	A	upstream_gene_variant	MODIFIER	H08J11.t5
436	X	11141344	T	A	upstream_gene_variant	MODIFIER	21ur-13016
436	X	13588160	A	T	synonymous_variant	LOW	unc-84
437	III	1567613	T	C	upstream_gene_variant	MODIFIER	Y67D2.8
437	III	1879417	C	A	upstream_gene_variant	MODIFIER	Y39A3CR.10
437	III	2187094	G	A	intron_variant	MODIFIER	gcn-1
437	III	6340761	T	A	upstream_gene_variant	MODIFIER	let-767
437	III	12334464	C	T	upstream_gene_variant	MODIFIER	zip-1
437	IV	1511127	T	G	upstream_gene_variant	MODIFIER	Y77E11A.17
437	IV	2363956	G	T	intron_variant	MODIFIER	tftc-1
437	IV	3380355	C	A	upstream_gene_variant	MODIFIER	otub-4
437	IV	3679040	G	A	upstream_gene_variant	MODIFIER	Y37E11AL.15
437	IV	3816054	G	T	upstream_gene_variant	MODIFIER	bris-1
437	IV	4675157	T	A	upstream_gene_variant	MODIFIER	F29B9.14
437	IV	5472876	C	T	missense_variant	MODERATE	rme-2
437	IV	8008533	C	T	upstream_gene_variant	MODIFIER	rig-4
437	IV	14617159	T	A	upstream_gene_variant	MODIFIER	21ur-7907
437	IV	15722301	A	C	3_prime_UTR_variant	MODIFIER	Y105C5A.15
437	IV	16070763	T	A	upstream_gene_variant	MODIFIER	Y105C5B.1418
437	I	3289051	G	C	splice_region_variant&synonymous_variant	LOW	sulp-6
437	I	6652636	G	A	missense_variant	MODERATE	ZC581.3
437	I	8779457	C	A	upstream_gene_variant	MODIFIER	pqn-26
437	I	9235980	C	A	missense_variant	MODERATE	tat-5
437	I	14265927	C	A	missense_variant	MODERATE	pes-7
437	II	115268	C	A	missense_variant	MODERATE	K10B4.3
437	II	2870221	C	T	synonymous_variant	LOW	Y110A2AL.2
437	II	3331971	T	C	splice_region_variant&intron_variant	LOW	irld-27
437	II	3526297	A	C	upstream_gene_variant	MODIFIER	col-72
437	II	4194751	G	T	upstream_gene_variant	MODIFIER	mth-2
437	II	4451602	C	T	upstream_gene_variant	MODIFIER	T12C9.8
437	II	6544847	C	A	missense_variant	MODERATE	lron-15
437	II	6639684	G	T	upstream_gene_variant	MODIFIER	T19D12.5
437	II	9526465	G	C	upstream_gene_variant	MODIFIER	sra-1
437	II	13883814	G	A	upstream_gene_variant	MODIFIER	mcd-1
437	II	14087084	A	G	synonymous_variant	LOW	xrn-1
437	V	291989	A	T	upstream_gene_variant	MODIFIER	F33E11.2
437	V	2039684	C	T	upstream_gene_variant	MODIFIER	srab-23
437	V	3810681	G	T	synonymous_variant	LOW	srw-6
437	V	5387455	G	C	upstream_gene_variant	MODIFIER	C35A11.10
437	V	5787739	A	G	splice_donor_variant&intron_variant	HIGH	nhr-142
437	V	6808576	G	A	missense_variant	MODERATE	dmsr-16
437	V	14762476	C	T	downstream_gene_variant	MODIFIER	Y50E8A.8
437	V	15436165	C	T	upstream_gene_variant	MODIFIER	T26H5.8
437	V	17699875	C	T	upstream_gene_variant	MODIFIER	Y26G10.1
437	V	18322592	G	A	synonymous_variant	LOW	B0462.5
437	X	1924000	G	A	missense_variant	MODERATE	ZC53.2
437	X	2810228	C	G	upstream_gene_variant	MODIFIER	C14A11.5
437	X	8860936	A	T	upstream_gene_variant	MODIFIER	C06E2.5
437	X	11891462	G	T	missense_variant	MODERATE	Y62H9A.8
437	X	12072101	G	T	stop_gained	HIGH	C15A7.2
437	X	12972104	C	T	synonymous_variant	LOW	ppk-3
437	X	16029244	C	T	upstream_gene_variant	MODIFIER	B0395.8
440	III	3921977	G	T	upstream_gene_variant	MODIFIER	ZK1058.5
440	III	4074890	A	G	upstream_gene_variant	MODIFIER	unc-79
440	III	4859040	A	T	upstream_gene_variant	MODIFIER	C35D10.6
440	III	5675801	G	A	missense_variant	MODERATE	par-3
440	III	8548974	A	C	upstream_gene_variant	MODIFIER	ZC21.6
440	III	13221120	G	A	upstream_gene_variant	MODIFIER	Y43F4A.1
440	IV	340051	C	T	upstream_gene_variant	MODIFIER	F18F11.1
440	IV	1711366	C	G	missense_variant	MODERATE	rpi-2
440	IV	4055260	G	T	upstream_gene_variant	MODIFIER	wrt-5
440	IV	5277408	T	A	upstream_gene_variant	MODIFIER	21ur-4832
440	IV	9981559	G	A	missense_variant	MODERATE	C47E12.7
440	IV	10261094	T	C	upstream_gene_variant	MODIFIER	F01G10.9
440	IV	10556464	C	G	missense_variant	MODERATE	zim-2
440	IV	10880372	T	A	upstream_gene_variant	MODIFIER	sdz-13
440	I	2180182	G	T	intron_variant	MODIFIER	afd-1
440	I	7141494	C	A	upstream_gene_variant	MODIFIER	K10D3.4
440	I	8656998	T	A	upstream_gene_variant	MODIFIER	flp-22
440	I	12487807	T	C	upstream_gene_variant	MODIFIER	T27F6.6
440	I	12620331	G	A	upstream_gene_variant	MODIFIER	T07D10.11
440	I	14997628	C	A	missense_variant	MODERATE	tep-1
440	II	550565	A	G	missense_variant	MODERATE	mlt-10
440	II	3020927	C	T	synonymous_variant	LOW	clec-2
440	II	5934512	C	A	upstream_gene_variant	MODIFIER	21ur-12994
440	II	12780979	G	T	upstream_gene_variant	MODIFIER	Y46G5A.34
440	V	1409183	C	T	upstream_gene_variant	MODIFIER	R12A1.5
440	V	3457190	A	T	upstream_gene_variant	MODIFIER	F27E11.6
440	V	8338819	C	T	upstream_gene_variant	MODIFIER	C08D8.4
440	V	9670636	G	A	missense_variant	MODERATE	sulp-8
440	V	11952505	C	A	upstream_gene_variant	MODIFIER	F58H1.21
440	V	13997447	C	A	missense_variant	MODERATE	ric-7
440	V	14100116	T	C	synonymous_variant	LOW	D1086.1
440	V	17053613	C	A	missense_variant	MODERATE	F28B1.3
440	V	20694874	C	T	synonymous_variant	LOW	F53F8.7
440	V	20910066	G	C	upstream_gene_variant	MODIFIER	F25C8.1
440	X	1252790	C	T	upstream_gene_variant	MODIFIER	C25G6.4
440	X	5839573	C	G	upstream_gene_variant	MODIFIER	F13D11.4
440	X	7580555	C	T	missense_variant	MODERATE	pcyt-1
440	X	8278395	G	A	downstream_gene_variant	MODIFIER	fis-2
440	X	9855669	C	A	upstream_gene_variant	MODIFIER	R07B1.22
440	X	11214656	G	A	upstream_gene_variant	MODIFIER	idh-2
440	X	12603621	G	A	upstream_gene_variant	MODIFIER	T24D5.5
440	X	13618336	C	T	upstream_gene_variant	MODIFIER	Y12A6A.2
440	X	14041212	G	A	upstream_gene_variant	MODIFIER	C04C11.20
440	X	14208658	G	T	upstream_gene_variant	MODIFIER	K06G5.9
440	X	14360139	G	T	upstream_gene_variant	MODIFIER	irk-3
440	X	14700817	A	T	upstream_gene_variant	MODIFIER	hch-1
443	III	345707	G	A	missense_variant	MODERATE	gei-4
443	III	448967	C	A	upstream_gene_variant	MODIFIER	Y55B1BR.7
443	III	1996674	T	G	upstream_gene_variant	MODIFIER	lgc-42
443	III	2749259	G	C	synonymous_variant	LOW	Y71H2AM.15
443	III	5177074	C	A	missense_variant	MODERATE	cid-1
443	III	9250274	C	T	upstream_gene_variant	MODIFIER	T02C1.2
443	III	11087470	C	A	upstream_gene_variant	MODIFIER	W09D6.5
443	III	11796147	A	G	synonymous_variant	LOW	twk-39
443	III	13217854	C	T	downstream_gene_variant	MODIFIER	tsp-3
443	IV	1274449	C	A	upstream_gene_variant	MODIFIER	C09E9.1
443	IV	4222948	C	T	upstream_gene_variant	MODIFIER	F30B5.11
443	IV	4286920	A	T	upstream_gene_variant	MODIFIER	F15E6.6
443	IV	6466868	T	A	upstream_gene_variant	MODIFIER	21ur-8592
443	IV	9688097	C	G	upstream_gene_variant	MODIFIER	htas-1
443	IV	16810554	G	A	upstream_gene_variant	MODIFIER	clec-193
443	IV	16910504	T	A	upstream_gene_variant	MODIFIER	21ur-13166
443	I	87331	T	A	upstream_gene_variant	MODIFIER	Y48G1C.6
443	I	278680	C	A	upstream_gene_variant	MODIFIER	C53D5.3
443	I	1531763	G	T	intron_variant	MODIFIER	Y92H12A.4
443	I	14496037	T	A	upstream_gene_variant	MODIFIER	Y105E8A.20
443	II	1695470	T	A	5_prime_UTR_variant	MODIFIER	F58E1.13
443	II	12532750	G	A	synonymous_variant	LOW	srx-120
443	II	12901346	T	A	synonymous_variant	LOW	clec-65
443	II	14209785	C	G	splice_region_variant&intron_variant	LOW	ace-3
443	II	14492418	C	T	synonymous_variant	LOW	vnut-1
443	MtDNA	1884	A	G	missense_variant	MODERATE	nduo-1
443	V	2122848	G	A	5_prime_UTR_variant	MODIFIER	F22F7.2
443	V	11433162	T	C	upstream_gene_variant	MODIFIER	T26H10.9
443	V	11570348	C	A	upstream_gene_variant	MODIFIER	pms-2
443	V	11612133	C	T	upstream_gene_variant	MODIFIER	F35B12.4
443	V	12305267	G	A	missense_variant	MODERATE	frm-7
443	V	12962718	T	A	upstream_gene_variant	MODIFIER	mpst-7
443	V	14719305	C	T	synonymous_variant	LOW	R08A2.1
443	V	18820962	T	C	upstream_gene_variant	MODIFIER	C54E10.t1
443	V	19894127	T	A	upstream_gene_variant	MODIFIER	gly-4
443	X	347644	G	A	upstream_gene_variant	MODIFIER	C04E7.3
443	X	442090	A	T	downstream_gene_variant	MODIFIER	F52D1.2
443	X	846405	G	A	upstream_gene_variant	MODIFIER	F39H12.3
443	X	1055473	C	A	downstream_gene_variant	MODIFIER	unc-1
443	X	5739908	G	A	splice_region_variant&intron_variant	LOW	gnrr-4
443	X	6300680	C	G	upstream_gene_variant	MODIFIER	T07H6.1
443	X	13325490	G	A	missense_variant	MODERATE	F46G10.2
443	X	14708625	A	C	upstream_gene_variant	MODIFIER	F40E10.6
443	X	15508126	G	A	upstream_gene_variant	MODIFIER	tbh-1
449	III	152157	C	A	upstream_gene_variant	MODIFIER	ver-2
449	III	922115	C	T	upstream_gene_variant	MODIFIER	F23H11.7
449	III	1107975	T	A	downstream_gene_variant	MODIFIER	F58B6.1
449	III	5585488	C	G	upstream_gene_variant	MODIFIER	F56D2.5
449	III	10595491	G	A	missense_variant	MODERATE	Y39A1A.3
449	III	11848748	G	A	upstream_gene_variant	MODIFIER	ntl-3
449	III	11894592	C	G	upstream_gene_variant	MODIFIER	faah-5
449	III	12823178	T	A	upstream_gene_variant	MODIFIER	Y37D8A.25
449	IV	174146	C	T	upstream_gene_variant	MODIFIER	Y38C1AA.16
449	IV	1199756	G	T	synonymous_variant	LOW	Y104H12D.3
449	IV	6030839	A	T	upstream_gene_variant	MODIFIER	21ur-9058
449	IV	9911509	C	T	upstream_gene_variant	MODIFIER	F25H8.14
449	IV	14155114	T	A	upstream_gene_variant	MODIFIER	oac-38
449	IV	14956756	G	A	upstream_gene_variant	MODIFIER	21ur-7037
449	I	1307706	C	T	upstream_gene_variant	MODIFIER	K12C11.8
449	I	2864686	G	A	upstream_gene_variant	MODIFIER	W10C8.6
449	I	4969181	T	C	missense_variant	MODERATE	W03G9.5
449	I	11341889	G	A	upstream_gene_variant	MODIFIER	M04D5.6
449	I	14558094	A	T	intron_variant	MODIFIER	rpom-1
449	II	656750	C	A	upstream_gene_variant	MODIFIER	K07E8.8
449	II	2329480	G	T	5_prime_UTR_variant	MODIFIER	ZK1240.1
449	II	4771999	A	T	upstream_gene_variant	MODIFIER	ttm-2
449	II	12569295	G	T	downstream_gene_variant	MODIFIER	str-223
449	II	13216161	G	C	synonymous_variant	LOW	F15D4.2
449	II	13624812	G	T	upstream_gene_variant	MODIFIER	gst-16
449	II	14553982	G	T	downstream_gene_variant	MODIFIER	nlp-41
449	V	463981	A	G	upstream_gene_variant	MODIFIER	nhr-201
449	V	3432592	C	T	missense_variant	MODERATE	srj-9
449	V	14258955	A	C	missense_variant	MODERATE	sre-8
449	V	15779372	C	T	upstream_gene_variant	MODIFIER	nhr-283
449	V	15819297	G	T	upstream_gene_variant	MODIFIER	fbxa-69
449	X	2407541	C	G	missense_variant	MODERATE	C43H6.3
449	X	5779811	G	A	upstream_gene_variant	MODIFIER	tag-257
449	X	5965932	T	C	downstream_gene_variant	MODIFIER	kin-2
449	X	9156255	G	T	upstream_gene_variant	MODIFIER	B0563.7
449	X	17221794	A	T	upstream_gene_variant	MODIFIER	acdh-7
450	III	4176111	T	C	missense_variant	MODERATE	hrde-1
450	III	5343968	A	G	missense_variant	MODERATE	ZK121.2
450	III	6932472	T	G	missense_variant	MODERATE	byn-1
450	III	6972389	T	G	missense_variant	MODERATE	rfc-4
450	III	8843993	A	T	downstream_gene_variant	MODIFIER	F44E2.6
450	III	11051821	C	T	upstream_gene_variant	MODIFIER	spat-2
450	III	12508403	C	A	intron_variant	MODIFIER	sql-1
450	IV	448629	T	G	downstream_gene_variant	MODIFIER	mrpl-55
450	IV	1781639	C	T	upstream_gene_variant	MODIFIER	frpr-19
450	IV	1845669	C	G	upstream_gene_variant	MODIFIER	egl-4
450	IV	2743291	T	G	downstream_gene_variant	MODIFIER	Y94H6A.t1
450	IV	3626736	T	A	upstream_gene_variant	MODIFIER	cha-1
450	IV	10545314	G	A	upstream_gene_variant	MODIFIER	21ur-9462
450	IV	11274277	C	T	upstream_gene_variant	MODIFIER	21ur-12489
450	IV	12625239	A	C	synonymous_variant	LOW	ark-1
450	IV	13058123	C	T	upstream_gene_variant	MODIFIER	F49E11.8
450	IV	13864854	G	A	upstream_gene_variant	MODIFIER	21ur-12753
450	IV	15914692	C	A	upstream_gene_variant	MODIFIER	21ur-13893
450	IV	17009515	G	A	upstream_gene_variant	MODIFIER	rom-4
450	I	6759333	C	A	missense_variant	MODERATE	calu-2
450	I	8167808	T	A	upstream_gene_variant	MODIFIER	H31B20.2
450	I	8702729	T	C	missense_variant	MODERATE	cdk-8
450	I	10509827	G	A	5_prime_UTR_variant	MODIFIER	che-13
450	I	14403748	G	A	upstream_gene_variant	MODIFIER	apg-1
450	II	5996649	A	T	upstream_gene_variant	MODIFIER	ins-5
450	II	7880040	A	G	missense_variant	MODERATE	T01H3.5
450	II	7919423	G	C	upstream_gene_variant	MODIFIER	spv-1
450	II	11490799	C	T	missense_variant	MODERATE	B0334.3
450	II	13359250	A	T	intergenic_region	MODIFIER	dmsr-3-Y48C3A.25
450	II	15200701	T	C	downstream_gene_variant	MODIFIER	Y46E12BR.1
450	V	2028980	T	G	upstream_gene_variant	MODIFIER	srab-13
450	V	7170227	A	G	upstream_gene_variant	MODIFIER	F09G2.12
450	V	8259099	C	T	upstream_gene_variant	MODIFIER	srt-25
450	V	11871371	A	T	upstream_gene_variant	MODIFIER	R13H4.7
450	V	13536894	T	C	upstream_gene_variant	MODIFIER	frpr-5
450	V	15790839	C	T	synonymous_variant	LOW	T26E4.4
450	V	16365541	A	G	upstream_gene_variant	MODIFIER	W08G11.3
450	V	17519381	C	T	upstream_gene_variant	MODIFIER	fbxa-136
450	V	18144888	C	A	upstream_gene_variant	MODIFIER	C14A6.3
450	V	18999888	C	A	upstream_gene_variant	MODIFIER	Y39B6A.34
450	X	1521358	T	G	splice_region_variant&intron_variant	LOW	toca-1
450	X	4554851	C	T	missense_variant&splice_region_variant	MODERATE	ham-2
450	X	6988370	C	T	upstream_gene_variant	MODIFIER	F01E11.19
450	X	7536774	C	A	missense_variant	MODERATE	dpy-7
450	X	8609339	G	A	upstream_gene_variant	MODIFIER	H35N09.2
450	X	11154570	G	A	upstream_gene_variant	MODIFIER	C05C9.3
450	X	11732798	C	A	upstream_gene_variant	MODIFIER	gst-42
450	X	13358034	C	A	upstream_gene_variant	MODIFIER	C49F8.10
450	X	14693495	A	G	upstream_gene_variant	MODIFIER	F40E10.7
450	X	16244315	C	G	upstream_gene_variant	MODIFIER	F23A7.6
450	X	17487527	G	A	upstream_gene_variant	MODIFIER	npr-24
455	III	10976774	G	T	upstream_gene_variant	MODIFIER	W05B2.9
455	III	11247132	A	T	intron_variant	MODIFIER	rsks-1
455	IV	2842086	C	T	upstream_gene_variant	MODIFIER	clec-83
455	IV	4899095	A	T	upstream_gene_variant	MODIFIER	21ur-10686
455	IV	7876180	G	C	missense_variant	MODERATE	kin-26
455	IV	8492351	C	T	upstream_gene_variant	MODIFIER	sru-7
455	IV	9947808	G	C	upstream_gene_variant	MODIFIER	gon-1
455	IV	11978308	G	A	missense_variant	MODERATE	unc-22
455	IV	13509680	A	T	upstream_gene_variant	MODIFIER	nlp-17
455	IV	15985619	C	T	upstream_gene_variant	MODIFIER	21ur-4708
455	I	569789	T	C	upstream_gene_variant	MODIFIER	ceh-9
455	I	2390116	A	T	intron_variant	MODIFIER	dot-1.1
455	I	6832935	A	T	upstream_gene_variant	MODIFIER	K02F2.10
455	I	8164460	T	A	upstream_gene_variant	MODIFIER	T28B8.10
455	I	8701274	T	A	upstream_gene_variant	MODIFIER	pbs-7
455	I	9642038	C	A	upstream_gene_variant	MODIFIER	T05F1.7
455	I	11396030	T	C	upstream_gene_variant	MODIFIER	Y53H1C.10
455	I	14317630	A	G	upstream_gene_variant	MODIFIER	src-2
455	II	2662337	A	T	missense_variant	MODERATE	gcy-21
455	II	7201627	C	T	missense_variant	MODERATE	E04F6.2
455	II	14392376	T	A	upstream_gene_variant	MODIFIER	kbp-3
455	V	6465683	G	A	upstream_gene_variant	MODIFIER	W01A11.14
455	V	8634739	C	T	missense_variant	MODERATE	oac-29
455	V	9066182	G	T	upstream_gene_variant	MODIFIER	C25E10.12
455	V	15304998	G	T	missense_variant	MODERATE	T26H8.5
455	V	17905726	T	A	upstream_gene_variant	MODIFIER	dcar-1
455	V	18954938	T	C	downstream_gene_variant	MODIFIER	ztf-20
455	X	1472200	C	T	splice_acceptor_variant&intron_variant	HIGH	D1005.5
455	X	3750250	C	A	upstream_gene_variant	MODIFIER	mir-266
455	X	4000655	G	A	upstream_gene_variant	MODIFIER	R02E12.4
455	X	4454914	C	G	missense_variant	MODERATE	F02E8.4
455	X	8650229	G	C	upstream_gene_variant	MODIFIER	F12D9.2
455	X	11449168	A	T	upstream_gene_variant	MODIFIER	igeg-2
455	X	13035724	C	A	upstream_gene_variant	MODIFIER	C53C7.8
456	III	5731250	C	G	upstream_gene_variant	MODIFIER	B0244.9
456	III	5798279	C	T	upstream_gene_variant	MODIFIER	ceh-10
456	III	6259904	C	T	synonymous_variant	LOW	srg-2
456	III	6764893	G	C	synonymous_variant	LOW	dig-1
456	III	11240910	C	G	upstream_gene_variant	MODIFIER	Y47D3A.14
456	IV	67108	G	A	upstream_gene_variant	MODIFIER	T05C7.6
456	IV	2165068	A	T	upstream_gene_variant	MODIFIER	linc-101
456	IV	2297966	G	T	intron_variant	MODIFIER	lin-1
456	IV	8939235	A	G	upstream_gene_variant	MODIFIER	D1046.13
456	IV	10496289	T	A	downstream_gene_variant	MODIFIER	ced-5
456	IV	13214834	A	T	upstream_gene_variant	MODIFIER	cho-1
456	IV	13412012	G	C	upstream_gene_variant	MODIFIER	Y62E10A.19
456	IV	16477301	G	A	upstream_gene_variant	MODIFIER	21ur-8255
456	IV	17448236	T	C	upstream_gene_variant	MODIFIER	21ur-15097
456	I	2686944	G	C	missense_variant	MODERATE	cpz-1
456	I	6692205	G	T	upstream_gene_variant	MODIFIER	ckr-1
456	I	7695971	G	C	synonymous_variant	LOW	gld-1
456	I	7737631	A	T	upstream_gene_variant	MODIFIER	21ur-12039
456	I	10010628	A	G	upstream_gene_variant	MODIFIER	C03C11.5
456	I	14571241	T	C	upstream_gene_variant	MODIFIER	Y105E8A.36
456	II	6440914	T	G	upstream_gene_variant	MODIFIER	K03H9.11
456	II	6982061	T	A	upstream_gene_variant	MODIFIER	C15F1.8
456	V	3880645	T	G	upstream_gene_variant	MODIFIER	nhr-159
456	V	3945675	C	A	missense_variant	MODERATE	cyp-35B3
456	V	5017317	C	T	upstream_gene_variant	MODIFIER	srr-4
456	V	6166497	C	T	missense_variant	MODERATE	ttn-1
456	V	7339019	C	G	missense_variant	MODERATE	srh-187
456	V	11544571	A	T	missense_variant	MODERATE	F38B7.2
456	V	11544572	T	C	synonymous_variant	LOW	F38B7.2
456	V	12042457	A	T	upstream_gene_variant	MODIFIER	kup-1
456	V	12375722	C	T	upstream_gene_variant	MODIFIER	F23H12.10
456	V	17225867	A	T	missense_variant	MODERATE	srh-112
456	V	18178956	A	T	upstream_gene_variant	MODIFIER	C31G12.4
456	X	1065679	T	A	upstream_gene_variant	MODIFIER	unc-1
456	X	1487503	G	A	upstream_gene_variant	MODIFIER	D1005.4
456	X	3479578	C	T	upstream_gene_variant	MODIFIER	ZK377.12
456	X	5363553	G	T	upstream_gene_variant	MODIFIER	chtl-1
456	X	5520370	G	A	synonymous_variant	LOW	mboa-3
456	X	7833953	G	T	missense_variant	MODERATE	sul-3
456	X	11058000	G	T	missense_variant	MODERATE	lpr-3
456	X	12185607	G	A	upstream_gene_variant	MODIFIER	F57G12.8
456	X	16402960	T	A	upstream_gene_variant	MODIFIER	F01G12.18
457	III	195053	T	A	upstream_gene_variant	MODIFIER	21ur-15576
457	III	253058	C	A	upstream_gene_variant	MODIFIER	Y50D7A.3
457	III	1722618	C	G	5_prime_UTR_variant	MODIFIER	Y22D7AR.12
457	III	2116092	T	C	upstream_gene_variant	MODIFIER	Y48G9A.6
457	III	3587398	T	G	upstream_gene_variant	MODIFIER	C48D5.7
457	III	6355392	A	C	upstream_gene_variant	MODIFIER	C56G2.20
457	III	8158075	A	T	downstream_gene_variant	MODIFIER	D2007.2
457	III	8888745	T	C	upstream_gene_variant	MODIFIER	svop-1
457	III	12181571	G	A	upstream_gene_variant	MODIFIER	gly-11
457	III	13373957	A	T	upstream_gene_variant	MODIFIER	T03F6.9
457	IV	2513536	T	A	intron_variant	MODIFIER	Y69A2AR.16
457	IV	2676890	G	C	missense_variant	MODERATE	Y94H6A.3
457	IV	5830751	A	T	upstream_gene_variant	MODIFIER	21ur-13493
457	IV	7281696	A	T	upstream_gene_variant	MODIFIER	C06E4.17
457	IV	8831207	C	T	upstream_gene_variant	MODIFIER	T28C6.8
457	IV	9188493	G	T	upstream_gene_variant	MODIFIER	21ur-12917
457	IV	9216990	T	C	5_prime_UTR_variant	MODIFIER	C46C2.2
457	IV	12831304	T	A	downstream_gene_variant	MODIFIER	F07C6.4
457	IV	12856877	A	T	upstream_gene_variant	MODIFIER	gcy-18
457	IV	12859393	G	T	upstream_gene_variant	MODIFIER	gcy-18
457	IV	13203905	A	T	upstream_gene_variant	MODIFIER	ced-3
457	IV	17213200	G	A	upstream_gene_variant	MODIFIER	21ur-3450
457	IV	17363918	A	T	missense_variant	MODERATE	clec-202
457	IV	17374294	G	T	missense_variant&splice_region_variant	MODERATE	C30H6.5
457	I	464157	G	C	downstream_gene_variant	MODIFIER	tol-1
457	I	604614	A	T	intron_variant	MODIFIER	hum-7
457	I	767417	G	A	upstream_gene_variant	MODIFIER	T06A4.1
457	I	2093003	C	G	upstream_gene_variant	MODIFIER	npp-13
457	I	2520552	C	A	upstream_gene_variant	MODIFIER	21ur-15102
457	I	5494386	A	T	upstream_gene_variant	MODIFIER	C09D4.1
457	I	6136632	T	A	synonymous_variant	LOW	F56F4.t2
457	I	6136636	C	G	missense_variant	MODERATE	F56F4.t2
457	I	8234955	C	T	upstream_gene_variant	MODIFIER	T02E1.8
457	I	13542759	C	T	upstream_gene_variant	MODIFIER	atg-4.1
457	II	3038457	G	T	upstream_gene_variant	MODIFIER	B0454.18
457	II	3754234	A	G	missense_variant	MODERATE	T24E12.5
457	II	9386053	C	T	upstream_gene_variant	MODIFIER	C06C3.5
457	II	10565908	C	T	upstream_gene_variant	MODIFIER	cdc-48.1
457	II	13440088	A	G	upstream_gene_variant	MODIFIER	Y48E1C.4
457	II	14508335	C	T	stop_gained&splice_region_variant	HIGH	K10H10.10
457	V	2864619	A	T	upstream_gene_variant	MODIFIER	srj-54
457	V	3764082	G	T	upstream_gene_variant	MODIFIER	chk-1
457	V	5723422	T	G	missense_variant	MODERATE	K09H11.4
457	V	8277197	A	T	upstream_gene_variant	MODIFIER	str-137
457	V	8687923	G	A	upstream_gene_variant	MODIFIER	ZC190.13
457	V	9541358	G	T	synonymous_variant	LOW	C50F4.16
457	V	12023584	T	A	3_prime_UTR_variant	MODIFIER	F10C2.3
457	V	12880821	A	C	upstream_gene_variant	MODIFIER	T07F10.11
457	V	14064374	T	A	upstream_gene_variant	MODIFIER	D1086.17
457	V	15572254	G	A	missense_variant	MODERATE	fbxa-95
457	V	18707661	C	T	upstream_gene_variant	MODIFIER	Y69H2.18
457	V	18919102	C	G	upstream_gene_variant	MODIFIER	Y80D3A.13
457	X	1242528	G	A	upstream_gene_variant	MODIFIER	C25G6.3
457	X	2359946	C	A	upstream_gene_variant	MODIFIER	T24D8.15
457	X	5219608	A	G	downstream_gene_variant	MODIFIER	H28G03.2
457	X	11414018	C	T	synonymous_variant	LOW	pek-1
457	X	11915320	A	G	missense_variant	MODERATE	Y62H9A.12
457	X	14780086	C	A	missense_variant	MODERATE	unc-3
457	X	14780087	G	A	missense_variant	MODERATE	unc-3
457	X	14869575	A	T	3_prime_UTR_variant	MODIFIER	F31F6.2
457	X	15459313	C	T	upstream_gene_variant	MODIFIER	sprr-1
458	III	1177833	C	G	missense_variant	MODERATE	cdh-12
458	III	7757725	G	C	upstream_gene_variant	MODIFIER	cdh-3
458	III	7785560	G	C	upstream_gene_variant	MODIFIER	mab-5
458	III	9856751	G	A	missense_variant	MODERATE	gpdh-2
458	III	11865857	C	T	upstream_gene_variant	MODIFIER	Y56A3A.2
458	III	12402595	G	A	upstream_gene_variant	MODIFIER	Y49E10.t1
458	III	13102974	A	T	upstream_gene_variant	MODIFIER	pqn-83
458	IV	2652978	A	G	upstream_gene_variant	MODIFIER	Y69A2AR.42
458	IV	6958040	C	A	upstream_gene_variant	MODIFIER	B0478.26
458	IV	8499778	C	T	missense_variant	MODERATE	mesp-1
458	IV	9348125	C	T	upstream_gene_variant	MODIFIER	T20D3.8
458	IV	11717114	G	T	upstream_gene_variant	MODIFIER	K01A6.21
458	IV	12036028	G	T	stop_gained	HIGH	sqst-1
458	IV	13069747	G	C	upstream_gene_variant	MODIFIER	col-131
458	IV	14864540	A	T	upstream_gene_variant	MODIFIER	Y57G11C.23
458	I	526288	C	T	upstream_gene_variant	MODIFIER	Y65B4BL.6
458	I	1235668	T	G	upstream_gene_variant	MODIFIER	herc-1
458	I	2064056	G	A	upstream_gene_variant	MODIFIER	Y37E3.1
458	I	2266638	A	T	upstream_gene_variant	MODIFIER	Y39G10AL.4
458	I	3687403	G	A	missense_variant	MODERATE	D1037.1
458	I	3699230	G	T	3_prime_UTR_variant	MODIFIER	hus-1
458	I	5213184	T	A	upstream_gene_variant	MODIFIER	C32E12.7
458	I	6902214	A	T	upstream_gene_variant	MODIFIER	srb-15
458	I	9997663	T	A	upstream_gene_variant	MODIFIER	T23D8.13
458	I	11031428	T	A	upstream_gene_variant	MODIFIER	Y52B11A.8
458	I	14031296	A	C	3_prime_UTR_variant	MODIFIER	ins-24
458	II	86329	T	C	upstream_gene_variant	MODIFIER	C23H3.10
458	II	553790	T	A	upstream_gene_variant	MODIFIER	C09E8.1
458	II	5059266	G	C	missense_variant	MODERATE	pho-12
458	II	6575425	T	A	upstream_gene_variant	MODIFIER	21ur-15425
458	II	6880796	C	T	synonymous_variant	LOW	pmp-1
458	II	8818201	C	T	upstream_gene_variant	MODIFIER	linc-72
458	II	10250440	A	T	upstream_gene_variant	MODIFIER	nrde-2
458	V	3366568	T	A	upstream_gene_variant	MODIFIER	C04E12.2
458	V	3648127	C	T	upstream_gene_variant	MODIFIER	F59B1.8
458	V	3993250	C	T	downstream_gene_variant	MODIFIER	nlp-28
458	V	4108781	C	G	missense_variant	MODERATE	T05B4.14
458	V	4774370	C	G	upstream_gene_variant	MODIFIER	C18G1.9
458	V	5376716	C	T	downstream_gene_variant	MODIFIER	C35A11.11
458	V	5708059	C	A	upstream_gene_variant	MODIFIER	F25B4.11
458	V	7425269	G	C	missense_variant	MODERATE	srw-68
458	V	9174028	G	T	upstream_gene_variant	MODIFIER	gad-3
458	V	9720300	C	T	missense_variant	MODERATE	F40F9.5
458	V	16614349	A	C	missense_variant	MODERATE	Y32B12C.3
458	V	17728081	G	T	missense_variant	MODERATE	twk-42
458	V	18594520	T	A	intron_variant	MODIFIER	grdn-1
458	V	18936821	C	T	upstream_gene_variant	MODIFIER	Y80D3A.8
458	X	1593937	A	T	upstream_gene_variant	MODIFIER	B0344.t3
458	X	3581041	T	C	upstream_gene_variant	MODIFIER	T27A10.10
458	X	4869874	T	G	upstream_gene_variant	MODIFIER	F39C12.8
458	X	7420396	G	A	upstream_gene_variant	MODIFIER	C10A4.7
458	X	11793863	C	T	upstream_gene_variant	MODIFIER	mir-239.2
458	X	12553065	G	T	upstream_gene_variant	MODIFIER	npr-4
458	X	14244017	C	T	upstream_gene_variant	MODIFIER	K04C1.3
461	III	1953090	A	G	upstream_gene_variant	MODIFIER	polh-1
461	III	3428484	G	A	missense_variant	MODERATE	K01A11.1
461	III	4182494	A	T	missense_variant	MODERATE	lars-1
461	III	4311964	T	A	upstream_gene_variant	MODIFIER	dcn-1
461	III	4392859	A	T	upstream_gene_variant	MODIFIER	R07E5.4
461	III	7521423	C	T	3_prime_UTR_variant	MODIFIER	C07H6.2
461	III	10606323	A	T	upstream_gene_variant	MODIFIER	Y39A1A.2
461	III	11499390	G	T	downstream_gene_variant	MODIFIER	tin-10
461	III	11876365	A	G	intron_variant	MODIFIER	Y56A3A.6
461	IV	1223536	A	T	upstream_gene_variant	MODIFIER	W09G12.10
461	IV	4053741	G	T	upstream_gene_variant	MODIFIER	pcn-1
461	IV	4496609	T	A	downstream_gene_variant	MODIFIER	ZK180.7
461	IV	6659672	C	T	missense_variant	MODERATE	C01B10.11
461	IV	15037476	C	T	missense_variant	MODERATE	eef-1B.2
461	IV	15362700	T	A	upstream_gene_variant	MODIFIER	21ur-5457
461	IV	15385348	C	G	upstream_gene_variant	MODIFIER	21ur-8641
461	IV	17216321	G	A	missense_variant	MODERATE	Y116A8B.1
461	I	2678288	C	A	upstream_gene_variant	MODIFIER	F32B5.13
461	I	9628571	G	A	synonymous_variant	LOW	hsr-9
461	I	10591277	G	A	missense_variant	MODERATE	set-18
461	I	11667820	T	G	upstream_gene_variant	MODIFIER	F11A6.11
461	II	1023445	T	A	3_prime_UTR_variant	MODIFIER	F45D11.1
461	II	1391531	A	T	missense_variant	MODERATE	aat-7
461	II	6258926	C	T	missense_variant	MODERATE	F13H8.11
461	II	10712697	C	A	upstream_gene_variant	MODIFIER	C09G5.7
461	II	12893885	A	G	missense_variant	MODERATE	clec-62
461	V	816730	A	T	upstream_gene_variant	MODIFIER	R13D11.10
461	V	1055199	T	A	upstream_gene_variant	MODIFIER	K10C9.4
461	V	4884807	C	T	missense_variant	MODERATE	T19H12.12
461	V	5046799	G	T	upstream_gene_variant	MODIFIER	K11D12.9
461	V	8956145	C	T	3_prime_UTR_variant	MODIFIER	gck-1
461	V	11462932	G	T	upstream_gene_variant	MODIFIER	T11F9.30
461	V	13666683	G	C	synonymous_variant	LOW	rde-12
461	V	15440021	A	T	upstream_gene_variant	MODIFIER	nspd-12
461	V	19655473	T	G	upstream_gene_variant	MODIFIER	dmd-3
461	X	314532	T	G	upstream_gene_variant	MODIFIER	M02E1.2
461	X	1960489	A	T	upstream_gene_variant	MODIFIER	F52D2.7
461	X	4973298	C	A	missense_variant	MODERATE	ZC8.6
461	X	13380357	G	T	upstream_gene_variant	MODIFIER	gem-1
461	X	13990963	T	A	upstream_gene_variant	MODIFIER	21ur-14064
461	X	14307094	A	T	upstream_gene_variant	MODIFIER	C11H1.5
462	III	1398245	A	G	upstream_gene_variant	MODIFIER	Y82E9BR.23
462	III	2070693	T	C	upstream_gene_variant	MODIFIER	Y39A3A.3
462	III	2829774	T	G	upstream_gene_variant	MODIFIER	Y71H2AR.1
462	III	10950281	G	T	downstream_gene_variant	MODIFIER	rle-1
462	III	12289084	G	C	missense_variant	MODERATE	mrp-8
462	III	12927358	T	A	upstream_gene_variant	MODIFIER	Y37D8A.17
462	IV	9173731	G	A	intergenic_region	MODIFIER	21ur-15424-C07C7.1
462	IV	9627186	A	G	missense_variant	MODERATE	mca-1
462	IV	11815331	C	A	upstream_gene_variant	MODIFIER	M117.9
462	IV	11815332	A	G	upstream_gene_variant	MODIFIER	M117.9
462	IV	13959761	C	T	upstream_gene_variant	MODIFIER	21ur-7388
462	IV	14906982	C	A	upstream_gene_variant	MODIFIER	21ur-7093
462	I	2172499	T	G	upstream_gene_variant	MODIFIER	afd-1
462	I	4193820	T	A	downstream_gene_variant	MODIFIER	ppw-1
462	II	1387403	A	C	splice_acceptor_variant&intron_variant	HIGH	aat-7
462	II	5405911	C	G	missense_variant	MODERATE	clec-141
462	II	6160280	G	T	upstream_gene_variant	MODIFIER	H35N03.2
462	II	6943913	G	T	upstream_gene_variant	MODIFIER	mir-8192
462	II	10716762	A	G	upstream_gene_variant	MODIFIER	dph-2
462	II	12216879	T	A	intron_variant	MODIFIER	pqn-87
462	II	14446542	G	A	intron_variant	MODIFIER	smg-8
462	MtDNA	6655	G	A	synonymous_variant	LOW	nduo-4
462	V	4307905	G	T	upstream_gene_variant	MODIFIER	ZC132.4
462	V	10496589	T	A	upstream_gene_variant	MODIFIER	C35A5.4
462	V	11238407	T	C	missense_variant	MODERATE	dvc-1
462	V	18521424	A	T	upstream_gene_variant	MODIFIER	hmit-1.2
462	X	1671140	T	C	upstream_gene_variant	MODIFIER	R09H3.3
462	X	1671156	G	C	missense_variant	MODERATE	tbx-31
462	X	2181002	C	T	synonymous_variant	LOW	F48B9.1
466	III	82397	G	C	upstream_gene_variant	MODIFIER	F54C4.5
466	III	1684105	A	C	upstream_gene_variant	MODIFIER	Y22D7AR.16
466	III	5318300	T	A	upstream_gene_variant	MODIFIER	F52C9.3
466	III	6404665	G	A	upstream_gene_variant	MODIFIER	let-756
466	III	6971406	A	G	synonymous_variant	LOW	eef-1A.1
466	III	7039180	T	G	intron_variant	MODIFIER	R01H2.7
466	III	12389781	A	G	upstream_gene_variant	MODIFIER	Y49E10.8
466	IV	3944933	A	G	missense_variant	MODERATE	clec-72
466	IV	8976433	G	A	missense_variant	MODERATE	C53B4.4
466	IV	16884370	C	T	upstream_gene_variant	MODIFIER	21ur-285
466	I	2984569	A	T	upstream_gene_variant	MODIFIER	Y71F9AR.4
466	I	4791801	T	A	downstream_gene_variant	MODIFIER	F54D7.6
466	I	5114395	A	C	upstream_gene_variant	MODIFIER	Y110A7A.21
466	I	9082737	T	A	upstream_gene_variant	MODIFIER	chaf-1
466	I	10953968	G	A	downstream_gene_variant	MODIFIER	Y95D11A.2
466	I	10979675	A	T	3_prime_UTR_variant	MODIFIER	Y52B11A.3
466	I	11522526	G	C	missense_variant	MODERATE	F32B4.4
466	I	15047283	C	T	missense_variant	MODERATE	F31C3.3
466	II	468696	G	T	upstream_gene_variant	MODIFIER	nfyb-1
466	II	3961573	C	T	upstream_gene_variant	MODIFIER	sea-2
466	II	8202647	C	A	missense_variant	MODERATE	qua-1
466	II	11150403	A	T	3_prime_UTR_variant	MODIFIER	pqm-1
466	II	14646123	C	T	upstream_gene_variant	MODIFIER	atgp-2
466	II	15229231	A	T	3_prime_UTR_variant	MODIFIER	spsb-1
466	V	3632142	A	G	upstream_gene_variant	MODIFIER	F59B1.6
466	V	3922892	T	A	synonymous_variant	LOW	srx-65
466	V	4329487	G	A	upstream_gene_variant	MODIFIER	nhr-125
466	V	4329488	G	A	upstream_gene_variant	MODIFIER	nhr-125
466	V	6189916	T	A	downstream_gene_variant	MODIFIER	ttn-1
466	V	6189918	G	A	downstream_gene_variant	MODIFIER	ttn-1
466	V	6947397	A	G	upstream_gene_variant	MODIFIER	Y57E12B.1
466	V	8001649	G	A	upstream_gene_variant	MODIFIER	Y97E10AR.8
466	V	8257942	C	A	missense_variant	MODERATE	srt-25
466	V	9751809	G	A	upstream_gene_variant	MODIFIER	F58E6.4
466	V	10053490	G	C	upstream_gene_variant	MODIFIER	F57A8.10
466	V	14350873	T	C	upstream_gene_variant	MODIFIER	Y49A3A.6
466	V	17510790	A	G	downstream_gene_variant	MODIFIER	srw-31
466	V	19804886	A	T	upstream_gene_variant	MODIFIER	Y116F11B.2
466	X	143791	C	T	upstream_gene_variant	MODIFIER	Y73B3A.8
466	X	2339061	A	G	upstream_gene_variant	MODIFIER	T01B6.4
466	X	3886944	A	G	upstream_gene_variant	MODIFIER	F47F2.1
466	X	8009010	A	T	upstream_gene_variant	MODIFIER	F45E1.12
466	X	8082200	C	A	stop_gained	HIGH	K07E3.4
466	X	9380334	T	A	splice_region_variant&intron_variant	LOW	pkc-2
466	X	11230933	T	A	missense_variant	MODERATE	C34F6.10
466	X	11430237	A	C	missense_variant	MODERATE	hum-4
466	X	12285717	T	A	upstream_gene_variant	MODIFIER	lips-2
466	X	14845374	C	T	upstream_gene_variant	MODIFIER	egrh-1
466	X	14930946	C	T	upstream_gene_variant	MODIFIER	ntr-2
468	III	568457	T	A	intron_variant	MODIFIER	B0353.1
468	III	2504623	A	G	upstream_gene_variant	MODIFIER	Y54F10AM.6
468	III	3344388	G	A	upstream_gene_variant	MODIFIER	F45H7.t1
468	III	4063053	A	T	upstream_gene_variant	MODIFIER	his-69
468	III	4337974	A	G	missense_variant	MODERATE	cdk-12
468	III	5253527	C	G	missense_variant	MODERATE	sumv-1
468	III	5416132	G	T	upstream_gene_variant	MODIFIER	grl-22
468	III	6301609	T	A	upstream_gene_variant	MODIFIER	F47D12.9
468	III	8976009	A	T	missense_variant	MODERATE	pde-2
468	III	9686523	G	T	upstream_gene_variant	MODIFIER	C07A9.5
468	III	11099641	A	T	downstream_gene_variant	MODIFIER	W09D6.9
468	III	12042528	G	A	downstream_gene_variant	MODIFIER	Y79H2A.4
468	III	12195467	C	T	downstream_gene_variant	MODIFIER	Y75B8A.54
468	III	12485564	A	G	upstream_gene_variant	MODIFIER	Y49E10.35
468	IV	94629	C	A	upstream_gene_variant	MODIFIER	scl-23
468	IV	582903	G	T	upstream_gene_variant	MODIFIER	F56A11.6
468	IV	1678994	C	T	synonymous_variant	LOW	Y41D4B.24
468	IV	5743510	A	T	upstream_gene_variant	MODIFIER	21ur-13314
468	IV	6086266	A	G	upstream_gene_variant	MODIFIER	ugt-20
468	IV	8297501	G	A	synonymous_variant	LOW	nprl-3
468	IV	8443411	C	G	upstream_gene_variant	MODIFIER	21ur-12237
468	IV	8954238	A	G	upstream_gene_variant	MODIFIER	tpra-1
468	IV	9596479	C	T	upstream_gene_variant	MODIFIER	F27C8.5
468	I	2180173	G	A	intron_variant	MODIFIER	afd-1
468	I	4784441	C	T	upstream_gene_variant	MODIFIER	F54D7.9
468	I	9243023	A	G	upstream_gene_variant	MODIFIER	tat-5
468	I	13019572	A	T	intron_variant	MODIFIER	pmr-1
468	I	13292469	C	G	upstream_gene_variant	MODIFIER	M01E5.4
468	I	13816837	T	C	upstream_gene_variant	MODIFIER	maea-1
468	I	14404546	G	C	upstream_gene_variant	MODIFIER	apg-1
468	II	495855	C	G	upstream_gene_variant	MODIFIER	W07E6.3
468	II	495858	T	A	upstream_gene_variant	MODIFIER	W07E6.3
468	II	495887	A	G	upstream_gene_variant	MODIFIER	W07E6.3
468	II	495889	G	T	upstream_gene_variant	MODIFIER	W07E6.3
468	II	3761216	G	A	missense_variant	MODERATE	T24E12.6
468	II	8923579	A	G	synonymous_variant	LOW	B0457.6
468	II	11520891	A	G	upstream_gene_variant	MODIFIER	B0334.18
468	II	13268143	A	T	upstream_gene_variant	MODIFIER	Y48C3A.5
468	II	13935210	G	T	upstream_gene_variant	MODIFIER	hot-3
468	V	230338	G	A	missense_variant	MODERATE	kin-33
468	V	4209819	T	A	downstream_gene_variant	MODIFIER	H43I07.1
468	V	6457210	G	A	upstream_gene_variant	MODIFIER	ZK40.4
468	V	17111499	G	A	upstream_gene_variant	MODIFIER	ZK218.11
468	V	19216043	T	G	upstream_gene_variant	MODIFIER	nhr-79
468	X	4311106	A	T	downstream_gene_variant	MODIFIER	C24A8.11
468	X	13401639	T	A	upstream_gene_variant	MODIFIER	F02C12.7
468	X	14576244	G	A	upstream_gene_variant	MODIFIER	C44H4.12
468	X	15351740	A	T	upstream_gene_variant	MODIFIER	Y15E3A.13
468	X	16091967	T	C	upstream_gene_variant	MODIFIER	C30F2.6
470	III	8557727	C	A	upstream_gene_variant	MODIFIER	acdh-6
470	III	8808412	C	T	upstream_gene_variant	MODIFIER	F54F2.7
470	III	8831550	G	A	upstream_gene_variant	MODIFIER	F54F2.9
470	III	13745093	G	T	missense_variant&splice_region_variant	MODERATE	tyr-2
470	IV	4154889	C	A	upstream_gene_variant	MODIFIER	K08D10.14
470	IV	7958372	A	C	upstream_gene_variant	MODIFIER	ceh-19
470	IV	7963833	A	C	upstream_gene_variant	MODIFIER	F57H12.5
470	IV	11319660	A	T	upstream_gene_variant	MODIFIER	B0035.3
470	IV	13002913	A	G	intergenic_region	MODIFIER	K10D11.7-mbk-2
470	I	1561043	G	T	upstream_gene_variant	MODIFIER	21ur-12465
470	I	4625599	A	T	upstream_gene_variant	MODIFIER	C44E4.1
470	I	5139779	A	G	upstream_gene_variant	MODIFIER	unc-63
470	I	7585983	G	C	missense_variant	MODERATE	prg-1
470	II	4609640	T	A	upstream_gene_variant	MODIFIER	pqn-35
470	II	5937754	A	T	upstream_gene_variant	MODIFIER	F28B12.6
470	II	8658642	C	T	3_prime_UTR_variant	MODIFIER	pyr-1
470	II	12273112	T	A	upstream_gene_variant	MODIFIER	Y57A10A.40
470	II	12291971	C	T	intron_variant	MODIFIER	Y57A10A.31
470	II	12702758	T	A	intron_variant	MODIFIER	tbc-17
470	V	79637	A	C	intron_variant	MODIFIER	daam-1
470	V	3357995	G	A	upstream_gene_variant	MODIFIER	C04E12.6
470	V	3668438	C	A	upstream_gene_variant	MODIFIER	str-113
470	V	14121048	A	G	upstream_gene_variant	MODIFIER	par-1
470	V	14675559	G	A	upstream_gene_variant	MODIFIER	C47E8.13
470	X	5168565	C	T	3_prime_UTR_variant	MODIFIER	mans-3
470	X	7280198	G	T	upstream_gene_variant	MODIFIER	K03A1.9
470	X	9727749	C	G	synonymous_variant	LOW	him-4
470	X	15883330	C	T	downstream_gene_variant	MODIFIER	F53H4.3
471	III	887105	C	G	upstream_gene_variant	MODIFIER	zer-1
471	III	977001	T	C	missense_variant	MODERATE	R06B10.2
471	III	1905938	T	G	upstream_gene_variant	MODIFIER	B0524.6
471	III	3155549	C	A	downstream_gene_variant	MODIFIER	linc-19
471	III	3407906	G	C	upstream_gene_variant	MODIFIER	npp-9
471	III	4091244	G	A	splice_region_variant&intron_variant	LOW	C03C10.2
471	III	7694394	G	T	upstream_gene_variant	MODIFIER	C18H2.5
471	III	8632800	T	A	upstream_gene_variant	MODIFIER	polk-1
471	IV	748968	G	A	splice_acceptor_variant&intron_variant	HIGH	kvs-5
471	IV	816735	A	G	intron_variant	MODIFIER	Y55F3BL.2
471	IV	816743	C	T	intron_variant	MODIFIER	Y55F3BL.2
471	IV	3407285	G	A	downstream_gene_variant	MODIFIER	pdhb-1
471	IV	3994817	G	A	upstream_gene_variant	MODIFIER	F47C12.6
471	IV	8747213	T	A	upstream_gene_variant	MODIFIER	F21D5.7
471	IV	9228344	G	A	upstream_gene_variant	MODIFIER	Y11D7A.3
471	IV	12124613	A	T	3_prime_UTR_variant	MODIFIER	aly-3
471	IV	13554246	C	T	upstream_gene_variant	MODIFIER	21ur-9641
471	IV	14669630	C	T	upstream_gene_variant	MODIFIER	21ur-10766
471	IV	14923801	T	A	upstream_gene_variant	MODIFIER	srt-51
471	IV	17463583	T	A	upstream_gene_variant	MODIFIER	F11E6.7
471	I	704198	G	A	upstream_gene_variant	MODIFIER	hgap-1
471	I	4532542	A	T	downstream_gene_variant	MODIFIER	zig-9
471	I	7056287	A	T	upstream_gene_variant	MODIFIER	W01A8.7
471	I	7444575	G	T	intron_variant	MODIFIER	unc-13
471	II	2444774	C	T	upstream_gene_variant	MODIFIER	F42G2.10
471	II	3964160	A	C	upstream_gene_variant	MODIFIER	sea-2
471	II	5262344	A	T	downstream_gene_variant	MODIFIER	C54A12.3
471	II	7673057	T	A	upstream_gene_variant	MODIFIER	F18A1.11
471	II	11041619	A	G	upstream_gene_variant	MODIFIER	cey-1
471	II	12923221	T	C	3_prime_UTR_variant	MODIFIER	wago-4
471	MtDNA	11326	G	T	upstream_gene_variant	MODIFIER	nduo-3
471	V	10570662	G	T	upstream_gene_variant	MODIFIER	del-6
471	V	11686755	T	C	upstream_gene_variant	MODIFIER	W05E10.2
471	V	11914941	C	T	upstream_gene_variant	MODIFIER	R31.2
471	V	12309083	T	A	missense_variant	MODERATE	hpo-30
471	V	13240607	G	A	upstream_gene_variant	MODIFIER	dmd-11
471	V	16685017	C	A	upstream_gene_variant	MODIFIER	srw-43
471	X	2070262	T	C	synonymous_variant	LOW	acl-4
471	X	2898082	T	C	missense_variant	MODERATE	F52B10.3
471	X	7742248	A	T	upstream_gene_variant	MODIFIER	ref-2
471	X	17373235	C	A	upstream_gene_variant	MODIFIER	F10D7.2
474	III	486188	C	G	missense_variant	MODERATE	nlp-32
474	III	926168	C	A	downstream_gene_variant	MODIFIER	21ur-15209
474	III	2023914	C	T	upstream_gene_variant	MODIFIER	ckr-2
474	III	3053622	C	T	missense_variant	MODERATE	H06I04.5
474	III	4009274	T	A	upstream_gene_variant	MODIFIER	21ur-14745
474	III	5411345	T	A	missense_variant	MODERATE	W03A5.1
474	III	10544013	C	T	upstream_gene_variant	MODIFIER	T21C12.3
474	III	11358619	G	T	upstream_gene_variant	MODIFIER	T28D6.12
474	III	13102446	A	T	upstream_gene_variant	MODIFIER	pqn-83
474	IV	1159983	G	A	upstream_gene_variant	MODIFIER	C50A2.3
474	IV	1807086	A	T	upstream_gene_variant	MODIFIER	Y38C1BA.1
474	IV	6031154	T	A	upstream_gene_variant	MODIFIER	21ur-9058
474	IV	6274497	A	G	missense_variant	MODERATE	aat-4
474	IV	10903215	C	A	missense_variant	MODERATE	ZK596.3
474	IV	15062001	G	A	upstream_gene_variant	MODIFIER	21ur-12313
474	I	2068274	C	A	synonymous_variant	LOW	arl-13
474	I	4256493	C	T	synonymous_variant	LOW	met-1
474	I	4333952	C	T	upstream_gene_variant	MODIFIER	ZK973.23
474	I	7368139	C	T	downstream_gene_variant	MODIFIER	linc-141
474	I	7792210	G	T	intron_variant	MODIFIER	D2005.6
474	I	11211495	T	G	3_prime_UTR_variant	MODIFIER	ztf-6
474	II	256692	C	T	upstream_gene_variant	MODIFIER	pqn-85
474	II	1393566	G	T	stop_gained	HIGH	F54D12.11
474	II	4208830	C	T	upstream_gene_variant	MODIFIER	mth-1
474	II	5873270	T	C	upstream_gene_variant	MODIFIER	F55C12.2
474	II	9387166	T	G	missense_variant	MODERATE	C06C3.8
474	II	10547242	C	A	missense_variant	MODERATE	mnk-1
474	II	11156957	G	T	upstream_gene_variant	MODIFIER	pqm-1
474	II	14830578	G	C	intron_variant	MODIFIER	nhr-61
474	II	14830579	A	T	intron_variant	MODIFIER	nhr-61
474	V	939143	C	T	missense_variant	MODERATE	Y50D4C.2
474	V	1327197	T	G	downstream_gene_variant	MODIFIER	Y75B7AL.9
474	V	1603686	C	T	downstream_gene_variant	MODIFIER	F16B4.3
474	V	3080810	G	A	missense_variant	MODERATE	srt-5
474	V	7419891	G	A	upstream_gene_variant	MODIFIER	srxa-4
474	V	7796528	T	G	upstream_gene_variant	MODIFIER	ZK742.7
474	V	19069927	C	T	missense_variant	MODERATE	Y39B6A.18
474	X	421341	G	A	upstream_gene_variant	MODIFIER	ZK1193.2
474	X	5904743	T	A	upstream_gene_variant	MODIFIER	H05L03.7
474	X	12339235	T	A	upstream_gene_variant	MODIFIER	21ur-11655
474	X	14531191	C	T	upstream_gene_variant	MODIFIER	D1025.11
474	X	15420504	T	C	upstream_gene_variant	MODIFIER	F39D8.3
475	III	5408052	T	A	3_prime_UTR_variant	MODIFIER	W03A5.2
475	III	5800695	C	T	upstream_gene_variant	MODIFIER	him-10
475	III	5941260	A	C	synonymous_variant	LOW	ubq-1
475	III	5941366	C	T	upstream_gene_variant	MODIFIER	EGAP1.1
475	III	6265507	T	A	upstream_gene_variant	MODIFIER	srg-4
475	III	7825920	A	T	upstream_gene_variant	MODIFIER	ZK652.6
475	III	13276746	T	A	upstream_gene_variant	MODIFIER	F56A8.10
475	IV	642813	T	G	intergenic_region	MODIFIER	nhr-76-K11H12.9
475	IV	712657	A	G	upstream_gene_variant	MODIFIER	cutl-26
475	IV	982371	A	T	downstream_gene_variant	MODIFIER	egrh-2
475	IV	2073608	A	C	downstream_gene_variant	MODIFIER	arrd-26
475	IV	3493315	C	T	upstream_gene_variant	MODIFIER	srz-79
475	IV	4454864	G	A	missense_variant	MODERATE	R08C7.11
475	IV	8908100	G	A	upstream_gene_variant	MODIFIER	C27B7.6
475	IV	9517003	A	G	5_prime_UTR_variant	MODIFIER	C33A12.19
475	IV	9546891	A	G	upstream_gene_variant	MODIFIER	21ur-10113
475	IV	11101357	G	T	missense_variant	MODERATE	M7.9
475	IV	16875820	C	G	upstream_gene_variant	MODIFIER	21ur-6562
475	I	1696012	G	T	upstream_gene_variant	MODIFIER	Y71G12B.31
475	I	11647308	C	G	upstream_gene_variant	MODIFIER	W04G5.13
475	I	13161614	A	T	upstream_gene_variant	MODIFIER	F22G12.4
475	I	13285143	G	C	missense_variant	MODERATE	M01E5.3
475	II	1140330	A	T	upstream_gene_variant	MODIFIER	pod-2
475	II	7178287	A	C	upstream_gene_variant	MODIFIER	glc-4
475	II	7434570	G	A	upstream_gene_variant	MODIFIER	kcc-3
475	II	7434571	T	A	upstream_gene_variant	MODIFIER	kcc-3
475	II	7434573	C	A	upstream_gene_variant	MODIFIER	kcc-3
475	II	9967609	T	A	upstream_gene_variant	MODIFIER	R53.2
475	II	10020480	G	A	upstream_gene_variant	MODIFIER	lec-2
475	II	12394785	G	C	upstream_gene_variant	MODIFIER	Y57A10B.7
475	II	13286492	G	A	upstream_gene_variant	MODIFIER	ztf-22
475	II	14265790	A	G	intron_variant	MODIFIER	Y54G11A.1
475	II	14639337	A	T	upstream_gene_variant	MODIFIER	sre-13
475	V	5877873	C	T	synonymous_variant	LOW	C02G6.1
475	V	5877885	T	G	synonymous_variant	LOW	C02G6.1
475	V	6372290	A	T	3_prime_UTR_variant	MODIFIER	F13H6.5
475	V	6894829	A	T	upstream_gene_variant	MODIFIER	K11C4.8
475	V	15325226	G	A	missense_variant	MODERATE	nhr-247
475	V	18825461	T	A	upstream_gene_variant	MODIFIER	C54E10.t2
475	X	1304684	T	A	intron_variant	MODIFIER	inso-1
475	X	1487551	T	A	upstream_gene_variant	MODIFIER	D1005.4
475	X	5382753	C	A	upstream_gene_variant	MODIFIER	kcnl-3
475	X	6532899	C	T	upstream_gene_variant	MODIFIER	ceh-60
475	X	8043421	C	A	missense_variant	MODERATE	xol-1
475	X	13724815	G	T	missense_variant	MODERATE	K11E4.6
475	X	13724817	C	A	missense_variant	MODERATE	K11E4.6
475	X	15229878	T	C	downstream_gene_variant	MODIFIER	piki-1
475	X	15650471	A	G	upstream_gene_variant	MODIFIER	F59D12.5
475	X	17219789	C	T	upstream_gene_variant	MODIFIER	acdh-10
475	X	17459980	G	A	synonymous_variant	LOW	mlc-1
476	III	3234743	C	A	downstream_gene_variant	MODIFIER	H09G03.1
476	III	6601941	G	T	upstream_gene_variant	MODIFIER	let-765
476	IV	745052	T	A	upstream_gene_variant	MODIFIER	Y55F3C.14
476	IV	2719630	C	A	upstream_gene_variant	MODIFIER	Y94H6A.7
476	IV	2802414	G	T	upstream_gene_variant	MODIFIER	Y54G2A.52
476	IV	2969976	A	T	downstream_gene_variant	MODIFIER	lad-2
476	IV	4855873	T	C	upstream_gene_variant	MODIFIER	21ur-8225
476	IV	5359029	C	T	missense_variant	MODERATE	hda-6
476	IV	8050769	A	T	upstream_gene_variant	MODIFIER	C26B2.11
476	IV	8512986	G	A	missense_variant	MODERATE	mes-6
476	IV	8608956	G	A	upstream_gene_variant	MODIFIER	F42A9.14
476	IV	11558363	G	T	upstream_gene_variant	MODIFIER	F12F6.8
476	IV	13117509	A	G	upstream_gene_variant	MODIFIER	best-2
476	IV	14720707	T	A	upstream_gene_variant	MODIFIER	21ur-1624
476	I	5959036	G	C	missense_variant	MODERATE	B0207.10
476	I	5959044	A	C	missense_variant	MODERATE	B0207.10
476	I	5959046	T	C	missense_variant	MODERATE	B0207.10
476	I	5959060	A	T	missense_variant	MODERATE	B0207.10
476	I	7039227	C	T	upstream_gene_variant	MODIFIER	F15C11.5
476	I	8469370	T	A	upstream_gene_variant	MODIFIER	D1081.3
476	I	9222690	A	T	upstream_gene_variant	MODIFIER	C45G3.4
476	I	9997664	A	T	upstream_gene_variant	MODIFIER	T23D8.13
476	I	10988578	T	A	intron_variant	MODIFIER	Y52B11A.4
476	II	4167443	T	G	upstream_gene_variant	MODIFIER	R03H10.10
476	II	4348168	A	T	upstream_gene_variant	MODIFIER	H20J04.9
476	II	5367417	A	C	upstream_gene_variant	MODIFIER	F09E5.20
476	II	6899264	A	T	upstream_gene_variant	MODIFIER	C44B7.11
476	II	8568175	T	C	missense_variant	MODERATE	col-38
476	II	8921128	A	T	upstream_gene_variant	MODIFIER	B0457.6
476	II	9469552	G	A	missense_variant	MODERATE	T19H5.6
476	V	1385961	C	T	upstream_gene_variant	MODIFIER	rga-4
476	V	2789594	G	A	missense_variant	MODERATE	ketn-1
476	V	5277563	G	A	downstream_gene_variant	MODIFIER	B0238.10
476	V	9673014	G	T	upstream_gene_variant	MODIFIER	sulp-8
476	V	14300367	C	G	missense_variant	MODERATE	F14D7.12
476	V	19068925	G	A	missense_variant	MODERATE	Y39B6A.18
476	X	675786	G	A	upstream_gene_variant	MODIFIER	T19D7.6
476	X	4371995	A	T	upstream_gene_variant	MODIFIER	R160.10
476	X	5013181	T	A	upstream_gene_variant	MODIFIER	ZC449.7
476	X	9654213	C	T	upstream_gene_variant	MODIFIER	aex-2
476	X	10852081	A	G	upstream_gene_variant	MODIFIER	C05A9.10
476	X	11344940	C	T	upstream_gene_variant	MODIFIER	2020-10-02
476	X	13245534	A	T	upstream_gene_variant	MODIFIER	K08H2.5
476	X	13367486	T	C	upstream_gene_variant	MODIFIER	C49F8.1
476	X	14665769	G	A	missense_variant	MODERATE	C26G2.2
476	X	17652919	A	T	downstream_gene_variant	MODIFIER	T23E7.5
477	III	3918651	A	G	3_prime_UTR_variant	MODIFIER	ccdc-47
477	III	5828006	T	G	upstream_gene_variant	MODIFIER	R12B2.11
477	III	12538438	G	A	downstream_gene_variant	MODIFIER	Y111B2A.25
477	III	12955417	A	T	downstream_gene_variant	MODIFIER	Y39E4A.1
477	IV	517037	A	T	downstream_gene_variant	MODIFIER	asm-3
477	IV	3771567	A	T	upstream_gene_variant	MODIFIER	vab-2
477	IV	5513242	A	G	upstream_gene_variant	MODIFIER	21ur-1966
477	IV	5513247	C	T	splice_region_variant&non_coding_transcript_exon_variant	LOW	21ur-2114
477	IV	5817120	C	T	upstream_gene_variant	MODIFIER	C31H1.8
477	IV	6863273	C	T	upstream_gene_variant	MODIFIER	R13H7.2
477	IV	6936163	T	A	upstream_gene_variant	MODIFIER	21ur-10175
477	IV	10564540	A	T	upstream_gene_variant	MODIFIER	C43F9.14
477	IV	16279578	C	A	upstream_gene_variant	MODIFIER	21ur-14131
477	I	2020841	A	T	downstream_gene_variant	MODIFIER	Y20F4.11
477	I	3069402	A	G	3_prime_UTR_variant	MODIFIER	arx-7
477	I	3247469	C	T	upstream_gene_variant	MODIFIER	mab-31
477	I	6022591	T	A	upstream_gene_variant	MODIFIER	csn-2
477	I	6793993	A	G	missense_variant	MODERATE	pqn-20
477	I	10656314	C	T	missense_variant	MODERATE	B0511.12
477	I	12948795	C	G	synonymous_variant	LOW	F08A8.3
477	I	14517362	C	T	intron_variant	MODIFIER	exc-4
477	II	3084043	T	A	missense_variant	MODERATE	copb-1
477	II	7666939	C	A	3_prime_UTR_variant	MODIFIER	rpa-1
477	II	7823965	C	T	upstream_gene_variant	MODIFIER	irld-47
477	II	11050091	G	T	upstream_gene_variant	MODIFIER	col-83
477	II	12527263	G	A	upstream_gene_variant	MODIFIER	T21B4.21
477	II	13523220	G	A	synonymous_variant	LOW	snx-14
477	II	15018664	T	A	upstream_gene_variant	MODIFIER	Y53F4B.51
477	V	3513082	T	A	downstream_gene_variant	MODIFIER	str-225
477	V	9329416	G	T	upstream_gene_variant	MODIFIER	K07B1.4
477	V	14115798	T	G	upstream_gene_variant	MODIFIER	par-1
477	V	14696281	G	T	upstream_gene_variant	MODIFIER	set-5
477	V	15570179	A	C	5_prime_UTR_variant	MODIFIER	lsm-5
477	V	17233428	G	T	upstream_gene_variant	MODIFIER	T19C9.9
477	V	18043447	G	A	upstream_gene_variant	MODIFIER	Y59A8B.33
477	X	709650	C	T	downstream_gene_variant	MODIFIER	M02A10.1
477	X	1218831	A	T	intron_variant	MODIFIER	C46H3.2
477	X	1309820	A	G	upstream_gene_variant	MODIFIER	C52B11.6
477	X	1910437	T	A	upstream_gene_variant	MODIFIER	rgs-9
477	X	2769887	T	A	synonymous_variant	LOW	F55F1.2
477	X	8292766	C	T	synonymous_variant	LOW	F13B9.1
477	X	11505432	C	T	downstream_gene_variant	MODIFIER	F29G6.2
480	III	863037	T	G	splice_region_variant&intron_variant	LOW	arx-4
480	III	2221248	A	G	upstream_gene_variant	MODIFIER	fbxa-8
480	III	2786817	A	T	3_prime_UTR_variant	MODIFIER	Y71H2AM.5
480	IV	1008526	T	G	synonymous_variant	LOW	Y55F3AM.9
480	IV	2509532	T	A	upstream_gene_variant	MODIFIER	Y69A2AR.22
480	IV	3211737	T	A	upstream_gene_variant	MODIFIER	puf-4
480	IV	3509487	C	T	missense_variant	MODERATE	ced-10
480	IV	3590726	C	T	synonymous_variant	LOW	taf-2
480	IV	3630090	G	T	upstream_gene_variant	MODIFIER	ZC416.2
480	IV	5334867	G	C	missense_variant	MODERATE	Y4C6B.3
480	IV	5683530	A	T	upstream_gene_variant	MODIFIER	C55C3.7
480	IV	7068934	G	A	upstream_gene_variant	MODIFIER	Y43B11AL.5
480	IV	13513659	G	T	missense_variant	MODERATE	dcap-2
480	IV	13695676	A	T	upstream_gene_variant	MODIFIER	21ur-11516
480	IV	15630822	T	G	upstream_gene_variant	MODIFIER	21ur-5913
480	I	1925107	T	A	downstream_gene_variant	MODIFIER	trpp-10
480	I	6969543	C	T	missense_variant	MODERATE	C30F12.2
480	I	7060090	G	T	upstream_gene_variant	MODIFIER	W01A8.2
480	I	7987893	C	A	missense_variant	MODERATE	H05L14.2
480	I	8713188	C	G	upstream_gene_variant	MODIFIER	cle-1
480	I	8876862	G	T	downstream_gene_variant	MODIFIER	snf-2
480	I	9577567	T	A	upstream_gene_variant	MODIFIER	rig-5
480	I	9927136	C	T	upstream_gene_variant	MODIFIER	strl-1
480	I	9927145	T	A	upstream_gene_variant	MODIFIER	strl-1
480	I	10153544	T	A	upstream_gene_variant	MODIFIER	F16C3.3
480	I	10840059	C	T	upstream_gene_variant	MODIFIER	C35E7.2
480	I	12064850	G	C	missense_variant	MODERATE	hrp-2
480	I	12926862	T	C	upstream_gene_variant	MODIFIER	Y18D10A.21
480	I	14352923	G	A	intron_variant	MODIFIER	Y105E8A.2
480	II	1299480	T	C	downstream_gene_variant	MODIFIER	Y57G7A.2
480	II	7100581	T	G	missense_variant	MODERATE	mmaa-1
480	II	10669608	T	A	upstream_gene_variant	MODIFIER	D2089.3
480	V	4268880	G	A	upstream_gene_variant	MODIFIER	srt-35
480	V	5965475	A	T	upstream_gene_variant	MODIFIER	pcm-1
480	V	6715169	T	A	upstream_gene_variant	MODIFIER	sna-1
480	V	8395542	G	A	upstream_gene_variant	MODIFIER	pho-6
480	V	10620837	T	C	intergenic_region	MODIFIER	H09F14.1-C32C4.13
480	V	11341232	C	T	upstream_gene_variant	MODIFIER	T02E9.21
480	V	12409773	T	G	upstream_gene_variant	MODIFIER	cdr-4
480	V	13842705	C	T	upstream_gene_variant	MODIFIER	srx-130
480	V	18393900	C	G	missense_variant	MODERATE	Y51A2B.6
480	V	19030229	G	T	upstream_gene_variant	MODIFIER	Y39B6A.79
480	X	52439	A	T	upstream_gene_variant	MODIFIER	Y73B3A.30
480	X	379375	C	A	splice_acceptor_variant&intron_variant	HIGH	R04A9.3
480	X	5629363	T	C	upstream_gene_variant	MODIFIER	T21F4.1
480	X	12190857	G	C	downstream_gene_variant	MODIFIER	T24F3.1
480	X	14342032	A	T	upstream_gene_variant	MODIFIER	sel-7
480	X	14987550	C	T	splice_donor_variant&intron_variant	HIGH	iglr-1
480	X	16583030	A	T	downstream_gene_variant	MODIFIER	K08B5.3
480	X	16977665	A	G	upstream_gene_variant	MODIFIER	F52G3.5
481	III	2143622	C	A	missense_variant	MODERATE	frl-1
481	III	2861687	A	C	intron_variant	MODIFIER	F56F11.4
481	III	3690532	G	A	upstream_gene_variant	MODIFIER	npr-15
481	III	7081142	C	A	upstream_gene_variant	MODIFIER	ZK418.13
481	III	7081176	A	T	upstream_gene_variant	MODIFIER	ZK418.13
481	III	7828349	T	A	missense_variant	MODERATE	egl-45
481	III	9617653	C	A	upstream_gene_variant	MODIFIER	pri-1
481	III	10399228	T	C	3_prime_UTR_variant	MODIFIER	chl-1
481	III	10407044	A	G	synonymous_variant	LOW	hat-1
481	III	11241748	C	T	upstream_gene_variant	MODIFIER	Y47D3A.14
481	III	12238477	G	T	upstream_gene_variant	MODIFIER	grl-15
481	III	13735639	G	A	missense_variant	MODERATE	W06F12.3
481	IV	3836797	C	T	upstream_gene_variant	MODIFIER	cal-3
481	IV	5339999	G	C	upstream_gene_variant	MODIFIER	21ur-12200
481	IV	9213702	G	T	stop_gained	HIGH	C46C2.6
481	IV	14381331	C	T	upstream_gene_variant	MODIFIER	21ur-8377
481	IV	14396846	A	T	missense_variant	MODERATE	Y67A10A.9
481	IV	16629374	C	A	5_prime_UTR_variant	MODIFIER	Y51H4A.936
481	I	1989393	G	A	intron_variant	MODIFIER	gap-3
481	I	7225777	C	T	upstream_gene_variant	MODIFIER	C01H6.8
481	I	7225778	A	T	upstream_gene_variant	MODIFIER	C01H6.8
481	I	8994992	C	T	missense_variant	MODERATE	tba-6
481	I	9193809	C	T	upstream_gene_variant	MODIFIER	lim-9
481	I	9492150	T	C	synonymous_variant	LOW	sac-1
481	I	11505114	C	T	upstream_gene_variant	MODIFIER	F32B4.t1
481	I	12231831	A	T	missense_variant	MODERATE	F14B6.3
481	I	13572438	C	A	synonymous_variant	LOW	Y87G2A.7
481	II	2485964	T	C	upstream_gene_variant	MODIFIER	F53G2.8
481	II	2698981	C	T	missense_variant	MODERATE	sri-61
481	II	3061620	C	T	missense_variant	MODERATE	Y25C1A.6
481	II	9873194	A	G	upstream_gene_variant	MODIFIER	old-1
481	II	15013612	A	T	upstream_gene_variant	MODIFIER	Y53F4B.9
481	V	434968	C	T	synonymous_variant	LOW	B0554.2
481	V	3766561	G	A	upstream_gene_variant	MODIFIER	Y39H10A.8
481	V	9311503	T	A	downstream_gene_variant	MODIFIER	F44A2.3
481	V	9784747	C	G	upstream_gene_variant	MODIFIER	F46B6.5
481	V	12505264	T	C	stop_retained_variant	LOW	nlp-46
481	V	17275250	G	T	upstream_gene_variant	MODIFIER	srh-262
481	X	5379261	A	C	missense_variant	MODERATE	sek-5
481	X	5559150	A	T	upstream_gene_variant	MODIFIER	C54G7.13
481	X	6043277	A	T	upstream_gene_variant	MODIFIER	hsp-25
481	X	6685384	T	A	upstream_gene_variant	MODIFIER	F38B6.8
481	X	8048328	C	T	upstream_gene_variant	MODIFIER	C18A11.11
481	X	8611406	T	C	upstream_gene_variant	MODIFIER	H35N09.t2
481	X	9570996	G	A	missense_variant	MODERATE	F49E2.2
481	X	11756280	G	A	missense_variant	MODERATE	C40H5.2
481	X	16087542	T	A	upstream_gene_variant	MODIFIER	C30F2.2
482	III	682116	G	T	downstream_gene_variant	MODIFIER	grk-2
482	III	2393043	C	A	upstream_gene_variant	MODIFIER	H14E04.4
482	III	6550742	T	G	synonymous_variant	LOW	C09E7.7
482	III	9128097	G	A	missense_variant	MODERATE	sec-16
482	III	11030945	A	G	upstream_gene_variant	MODIFIER	Y48A6B.7
482	IV	320290	A	T	upstream_gene_variant	MODIFIER	K02D7.8
482	IV	863388	A	T	upstream_gene_variant	MODIFIER	Y55F3BR.17
482	IV	3783808	T	G	intergenic_region	MODIFIER	vab-2-W07G9.3
482	IV	5081310	C	T	upstream_gene_variant	MODIFIER	21ur-9197
482	IV	8587506	T	A	upstream_gene_variant	MODIFIER	catp-7
482	IV	11999142	G	A	upstream_gene_variant	MODIFIER	ZK617.20
482	IV	11999143	A	G	upstream_gene_variant	MODIFIER	ZK617.20
482	IV	16431926	C	A	upstream_gene_variant	MODIFIER	21ur-4958
482	IV	17164760	A	T	upstream_gene_variant	MODIFIER	21ur-360
482	I	1477610	A	T	intron_variant	MODIFIER	acs-16
482	I	2564605	A	T	upstream_gene_variant	MODIFIER	scrt-1
482	I	3655075	C	A	missense_variant	MODERATE	col-51
482	I	6437879	A	T	downstream_gene_variant	MODIFIER	T23H2.3
482	I	10409092	C	T	upstream_gene_variant	MODIFIER	F25D7.6
482	I	12995606	G	T	upstream_gene_variant	MODIFIER	smu-1
482	I	12995607	A	T	upstream_gene_variant	MODIFIER	smu-1
482	I	14740633	G	T	upstream_gene_variant	MODIFIER	K05C4.5
482	MtDNA	11202	G	T	upstream_gene_variant	MODIFIER	nduo-3
482	V	13367351	A	G	missense_variant	MODERATE	srx-125
482	V	13924782	T	A	upstream_gene_variant	MODIFIER	srxa-12
482	V	15011054	G	A	upstream_gene_variant	MODIFIER	F14H8.10
482	V	16432365	C	T	missense_variant	MODERATE	clec-234
482	V	19161771	T	G	upstream_gene_variant	MODIFIER	Y39B6A.5
482	X	2883972	A	T	upstream_gene_variant	MODIFIER	F53B3.5
482	X	3090751	T	C	synonymous_variant	LOW	pccb-1
482	X	4882869	A	G	upstream_gene_variant	MODIFIER	T07F12.8
482	X	5454884	C	G	upstream_gene_variant	MODIFIER	C25F6.6
482	X	7259055	G	A	synonymous_variant	LOW	lact-1
482	X	7796981	G	C	missense_variant&splice_region_variant	MODERATE	adm-4
482	X	13725001	G	A	missense_variant	MODERATE	K11E4.6
482	X	14566740	A	T	downstream_gene_variant	MODIFIER	C44H4.4
482	X	15294196	A	C	upstream_gene_variant	MODIFIER	21ur-14233
482	X	15547828	C	G	upstream_gene_variant	MODIFIER	lron-3
483	III	1812520	G	A	upstream_gene_variant	MODIFIER	Y39A3CL.11
483	III	2107200	C	T	3_prime_UTR_variant	MODIFIER	ppk-2
483	III	2704072	G	A	missense_variant	MODERATE	set-27
483	III	3786696	T	C	upstream_gene_variant	MODIFIER	T24A11.10
483	III	4083077	A	T	downstream_gene_variant	MODIFIER	unc-79
483	III	12457345	A	T	upstream_gene_variant	MODIFIER	ani-1
483	IV	174058	T	G	upstream_gene_variant	MODIFIER	Y38C1AA.16
483	IV	7489857	G	T	upstream_gene_variant	MODIFIER	his-61
483	IV	9553258	C	T	intron_variant	MODIFIER	T05A1.5
483	IV	13348115	A	C	downstream_gene_variant	MODIFIER	W02A2.5
483	IV	17277712	C	T	3_prime_UTR_variant	MODIFIER	clec-196
483	IV	17277716	T	A	3_prime_UTR_variant	MODIFIER	clec-196
483	IV	17277718	C	A	3_prime_UTR_variant	MODIFIER	clec-196
483	IV	17277724	G	C	3_prime_UTR_variant	MODIFIER	clec-196
483	IV	17277729	A	C	3_prime_UTR_variant	MODIFIER	clec-196
483	IV	17277732	G	T	3_prime_UTR_variant	MODIFIER	clec-196
483	I	720200	G	A	synonymous_variant	LOW	pif-1
483	I	8875445	G	A	upstream_gene_variant	MODIFIER	F55H12.3
483	I	10255178	C	A	3_prime_UTR_variant	MODIFIER	lin-11
483	I	11754015	G	A	missense_variant	MODERATE	vab-10
483	I	14477329	A	T	downstream_gene_variant	MODIFIER	ekl-4
483	II	2642686	G	C	synonymous_variant	LOW	F22E5.7
483	II	4366097	T	C	upstream_gene_variant	MODIFIER	try-9
483	II	7542179	T	G	missense_variant	MODERATE	nfi-1
483	II	12861198	C	T	upstream_gene_variant	MODIFIER	21ur-14976
483	V	1018907	G	A	downstream_gene_variant	MODIFIER	ergo-1
483	V	1018908	G	A	downstream_gene_variant	MODIFIER	ergo-1
483	V	5143156	A	G	missense_variant	MODERATE	srh-129
483	V	5818918	T	C	upstream_gene_variant	MODIFIER	ZC250.8
483	V	13460532	G	A	upstream_gene_variant	MODIFIER	frm-10
483	V	18634675	G	A	upstream_gene_variant	MODIFIER	Y69H2.14
483	X	2276296	A	G	upstream_gene_variant	MODIFIER	AH9.4
483	X	2588085	C	A	upstream_gene_variant	MODIFIER	H01M10.2
483	X	3627803	T	C	upstream_gene_variant	MODIFIER	C18B2.1
483	X	5168224	T	A	upstream_gene_variant	MODIFIER	21ur-13976
483	X	7138960	C	T	upstream_gene_variant	MODIFIER	clec-86
483	X	11813268	G	A	upstream_gene_variant	MODIFIER	C34E11.11
483	X	15588609	T	A	upstream_gene_variant	MODIFIER	mir-1829.1
483	X	17626323	G	T	intron_variant	MODIFIER	H18N23.2
484	III	597602	G	A	downstream_gene_variant	MODIFIER	lec-6
484	III	3438582	G	A	upstream_gene_variant	MODIFIER	K01A11.8
484	III	3685051	A	G	intron_variant	MODIFIER	npr-15
484	III	5405968	A	T	upstream_gene_variant	MODIFIER	Y32H12A.8
484	III	5575815	C	A	downstream_gene_variant	MODIFIER	F56D2.5
484	III	8152594	T	C	upstream_gene_variant	MODIFIER	D2007.1
484	III	9397495	A	T	upstream_gene_variant	MODIFIER	gpr-2
484	III	10408603	A	T	splice_region_variant&intron_variant	LOW	M03C11.3
484	IV	2335000	A	T	missense_variant	MODERATE	ppgn-1
484	IV	5239043	T	A	upstream_gene_variant	MODIFIER	Y59E9AR.2
484	IV	12675815	C	T	synonymous_variant	LOW	T23B5.4
484	IV	14087485	T	C	upstream_gene_variant	MODIFIER	21ur-8313
484	IV	15566901	G	A	upstream_gene_variant	MODIFIER	21ur-3185
484	IV	15597154	C	A	upstream_gene_variant	MODIFIER	Y105C5A.30
484	IV	15601076	T	A	upstream_gene_variant	MODIFIER	21ur-11993
484	I	698244	C	T	missense_variant	MODERATE	Y18H1A.2
484	I	2004907	A	T	upstream_gene_variant	MODIFIER	gap-3
484	I	2004920	A	T	upstream_gene_variant	MODIFIER	gap-3
484	I	2600734	A	C	upstream_gene_variant	MODIFIER	K07A3.5
484	I	5285613	T	C	upstream_gene_variant	MODIFIER	dhs-1
484	I	5439111	C	T	missense_variant	MODERATE	F27C1.11
484	I	10720397	C	A	upstream_gene_variant	MODIFIER	B0205.1
484	I	10895232	A	T	upstream_gene_variant	MODIFIER	lrk-1
484	I	12048350	T	A	upstream_gene_variant	MODIFIER	F58D5.9
484	I	12131901	C	T	downstream_gene_variant	MODIFIER	srt-21
484	I	12131902	T	A	downstream_gene_variant	MODIFIER	srt-21
484	I	12131905	T	C	downstream_gene_variant	MODIFIER	srt-21
484	II	1150839	A	C	missense_variant	MODERATE	pod-2
484	II	1435641	A	T	upstream_gene_variant	MODIFIER	Y51H7C.36
484	II	6462907	C	T	upstream_gene_variant	MODIFIER	K06A1.7
484	II	8917180	C	A	upstream_gene_variant	MODIFIER	21ur-14377
484	II	9395371	G	T	upstream_gene_variant	MODIFIER	C06C3.8
484	II	11068647	C	T	missense_variant	MODERATE	unc-53
484	II	12984220	T	A	upstream_gene_variant	MODIFIER	cyd-1
484	II	12984221	T	A	upstream_gene_variant	MODIFIER	cyd-1
484	II	13560775	G	C	missense_variant	MODERATE	Y48E1B.3
484	II	13561046	G	A	missense_variant	MODERATE	Y48E1B.3
484	II	13794273	C	T	intron_variant	MODIFIER	ZK131.11
484	II	14459694	C	A	intron_variant	MODIFIER	dmsr-6
484	V	2118862	T	A	upstream_gene_variant	MODIFIER	F22F7.6
484	V	2567105	G	T	missense_variant	MODERATE	Y45G12C.1
484	V	6473508	T	G	upstream_gene_variant	MODIFIER	W01A11.19
484	V	8967055	G	T	upstream_gene_variant	MODIFIER	nhr-44
484	V	8967088	C	T	upstream_gene_variant	MODIFIER	nhr-44
484	V	10882684	G	T	upstream_gene_variant	MODIFIER	F32D8.2
484	V	11367715	C	G	upstream_gene_variant	MODIFIER	dop-5
484	V	13112386	G	A	upstream_gene_variant	MODIFIER	max-1
484	V	13219119	C	T	upstream_gene_variant	MODIFIER	F57B1.15
484	V	18328825	T	A	downstream_gene_variant	MODIFIER	B0462.1
484	V	19165480	A	T	upstream_gene_variant	MODIFIER	Y39B6A.76
484	X	2989784	T	C	missense_variant	MODERATE	osm-5
484	X	2989810	G	T	stop_gained	HIGH	osm-5
484	X	3551402	G	A	upstream_gene_variant	MODIFIER	rgs-7
484	X	3806847	C	T	upstream_gene_variant	MODIFIER	erp-1
484	X	4972310	C	T	upstream_gene_variant	MODIFIER	M03F4.6
484	X	6646241	T	A	upstream_gene_variant	MODIFIER	C56E10.3
484	X	6859927	A	G	upstream_gene_variant	MODIFIER	C53B7.12
484	X	8343766	G	T	downstream_gene_variant	MODIFIER	F55E10.2
484	X	8627150	T	A	upstream_gene_variant	MODIFIER	K01A12.3
484	X	9394927	A	C	upstream_gene_variant	MODIFIER	fln-2
484	X	9808273	T	G	upstream_gene_variant	MODIFIER	lgc-47
484	X	12308562	G	T	upstream_gene_variant	MODIFIER	F17A2.4
484	X	13987290	C	T	upstream_gene_variant	MODIFIER	C31E10.1
484	X	15233620	G	C	upstream_gene_variant	MODIFIER	H03A11.2
484	X	15513155	T	A	upstream_gene_variant	MODIFIER	H30A04.6
486	III	876985	T	A	upstream_gene_variant	MODIFIER	T24C4.3
486	III	4534201	A	G	missense_variant	MODERATE	cdh-4
486	III	5148769	G	A	upstream_gene_variant	MODIFIER	Y54H5A.1
486	III	6352572	G	A	upstream_gene_variant	MODIFIER	C56G2.18
486	III	6558221	A	T	missense_variant	MODERATE	C09E7.8
486	III	9922085	G	A	upstream_gene_variant	MODIFIER	F40F12.3
486	III	10506060	T	A	upstream_gene_variant	MODIFIER	rab-33
486	III	11907489	A	T	upstream_gene_variant	MODIFIER	faah-4
486	III	13650679	G	C	missense_variant	MODERATE	set-16
486	IV	494061	G	A	intergenic_region	MODIFIER	M04G7.3-W03G1.11
486	IV	5477630	G	A	splice_acceptor_variant&intron_variant	HIGH	T11F8.2
486	IV	8535604	C	A	upstream_gene_variant	MODIFIER	hyl-1
486	IV	12228474	A	T	upstream_gene_variant	MODIFIER	Y39C12A.1
486	IV	12538988	A	G	upstream_gene_variant	MODIFIER	F53B2.14
486	IV	13530463	C	T	upstream_gene_variant	MODIFIER	rsd-2
486	I	2572613	G	T	missense_variant	MODERATE	aat-5
486	I	4366154	C	G	missense_variant	MODERATE	ZK973.8
486	I	9950132	G	A	downstream_gene_variant	MODIFIER	T24D1.2
486	I	10266554	T	G	missense_variant	MODERATE	ZC247.1
486	I	11521785	C	A	upstream_gene_variant	MODIFIER	F32B4.5
486	I	11699311	G	A	missense_variant	MODERATE	sri-12
486	I	11902939	T	A	upstream_gene_variant	MODIFIER	Y47H9C.9
486	II	4172124	G	A	missense_variant	MODERATE	R03H10.6
486	II	4585925	A	C	intron_variant	MODIFIER	vab-1
486	II	5549754	T	C	upstream_gene_variant	MODIFIER	ins-13
486	V	1887034	G	T	upstream_gene_variant	MODIFIER	oig-6
486	V	1953927	C	T	synonymous_variant	LOW	srj-16
486	V	4096490	C	T	intron_variant	MODIFIER	nhr-181
486	V	11894181	T	G	upstream_gene_variant	MODIFIER	sodh-2
486	V	13109730	T	A	upstream_gene_variant	MODIFIER	VB0365.1
486	V	14729378	C	G	upstream_gene_variant	MODIFIER	Y50E8A.20
486	V	15243049	C	T	upstream_gene_variant	MODIFIER	srw-12
486	V	17210738	G	T	missense_variant	MODERATE	srh-236
486	V	20073737	G	A	downstream_gene_variant	MODIFIER	fre-1
486	X	1595785	G	A	upstream_gene_variant	MODIFIER	B0344.1
486	X	6242310	G	A	missense_variant	MODERATE	got-2.2
486	X	6590037	A	T	upstream_gene_variant	MODIFIER	T28B4.12
486	X	7101285	A	C	upstream_gene_variant	MODIFIER	C36B7.5
486	X	10187622	A	T	downstream_gene_variant	MODIFIER	arrd-28
486	X	11017195	G	A	downstream_gene_variant	MODIFIER	F58A3.3
486	X	12014411	A	G	synonymous_variant	LOW	nmat-1
486	X	12568148	C	A	upstream_gene_variant	MODIFIER	R01H5.2
486	X	13203718	T	A	upstream_gene_variant	MODIFIER	F09D5.9
486	X	13203719	T	A	upstream_gene_variant	MODIFIER	F09D5.9
486	X	13324041	G	A	stop_gained	HIGH	F46G10.2
486	X	13653483	C	A	upstream_gene_variant	MODIFIER	C40C9.t1
486	X	15150308	T	A	upstream_gene_variant	MODIFIER	C11G10.3
486	X	15851474	C	A	missense_variant	MODERATE	acl-1
488	III	2402897	A	T	upstream_gene_variant	MODIFIER	cic-1
488	III	3229911	C	T	upstream_gene_variant	MODIFIER	Y53G8AL.1
488	III	4161573	G	T	upstream_gene_variant	MODIFIER	C16C10.9
488	III	10004793	T	C	synonymous_variant	LOW	C05B5.11
488	III	11967647	C	T	downstream_gene_variant	MODIFIER	ung-1
488	IV	752017	G	T	missense_variant	MODERATE	kvs-5
488	IV	1774640	C	T	missense_variant	MODERATE	Y41D4A.1
488	IV	2410816	C	G	missense_variant	MODERATE	Y38F2AR.12
488	IV	2771805	A	G	upstream_gene_variant	MODIFIER	Y54G2A.11
[truncated: 1,112 more rows]

## Sheet: PB306_indels
Line	CHROM	POS	REF	ALT	type	putative effect	Gene annotation
402	III	3494802	CT	C	upstream_gene_variant	MODIFIER	gly-14
402	III	4688832	GA	G	upstream_gene_variant	MODIFIER	clec-155
402	III	12281861	ATT	A	downstream_gene_variant	MODIFIER	mrp-8
402	IV	115536	AT	A	downstream_gene_variant	MODIFIER	F29C4.4
402	IV	1283227	AT	A	intergenic_region	MODIFIER	C09E9.1-plst-1
402	IV	11058232	A	AT	upstream_gene_variant	MODIFIER	F36H1.12
402	I	8596889	G	GA	upstream_gene_variant	MODIFIER	R05D11.4
402	I	11575251	TTTTTGAGTTA	T	upstream_gene_variant	MODIFIER	F15D3.5
402	II	4337238	G	GA	upstream_gene_variant	MODIFIER	athp-2
402	II	12202390	TA	T	upstream_gene_variant	MODIFIER	polg-1
402	II	14427937	G	GGGGGA	upstream_gene_variant	MODIFIER	plx-2
402	V	742673	TA	T	upstream_gene_variant	MODIFIER	srj-24
402	V	16379522	T	TCGAGAA	upstream_gene_variant	MODIFIER	srv-34
402	V	17468061	CCA	C	upstream_gene_variant	MODIFIER	srh-114
402	V	17468064	TACA	T	upstream_gene_variant	MODIFIER	srh-114
402	V	17468070	A	AT	upstream_gene_variant	MODIFIER	srh-114
402	V	17468073	G	GT	upstream_gene_variant	MODIFIER	srh-114
402	V	17468074	GCA	G	upstream_gene_variant	MODIFIER	srh-114
402	V	17468083	AG	A	upstream_gene_variant	MODIFIER	srh-114
402	V	19051913	TGAAAA	T	upstream_gene_variant	MODIFIER	asp-1
402	V	19051922	TGGG	T	upstream_gene_variant	MODIFIER	asp-1
402	V	19051931	TGTGGG	T	upstream_gene_variant	MODIFIER	asp-1
402	V	20339420	A	AT	upstream_gene_variant	MODIFIER	Y38H6A.5
402	X	54651	C	CT	upstream_gene_variant	MODIFIER	Y73B3A.23
402	X	2278175	CTTTGA	C	upstream_gene_variant	MODIFIER	AH9.4
402	X	2278190	A	AT	upstream_gene_variant	MODIFIER	AH9.4
402	X	2724495	AGT	A	frameshift_variant	HIGH	unc-2
402	X	3013492	G	GA	downstream_gene_variant	MODIFIER	Y48D7A.1
402	X	12977041	AT	A	upstream_gene_variant	MODIFIER	ppk-3
402	X	14252826	GA	G	upstream_gene_variant	MODIFIER	E02H4.6
403	IV	1728650	G	GT	upstream_gene_variant	MODIFIER	K08D12.7
403	IV	10835522	TCTA	T	upstream_gene_variant	MODIFIER	best-15
403	IV	12856876	TA	T	upstream_gene_variant	MODIFIER	gcy-18
403	I	3185564	AT	A	intron_variant	MODIFIER	Y54E10A.11
403	I	13304911	GA	G	upstream_gene_variant	MODIFIER	sepa-1
403	I	13374962	GAATTGCCGTTCGGCAAATCAGAA	G	upstream_gene_variant	MODIFIER	Y40B1A.5
403	II	4320067	AC	A	upstream_gene_variant	MODIFIER	srw-40
403	II	10506582	AT	A	upstream_gene_variant	MODIFIER	pqn-47
403	V	19782766	GA	G	upstream_gene_variant	MODIFIER	fbxa-194
403	V	19934468	G	GA	upstream_gene_variant	MODIFIER	Y60A3A.14
403	X	5794438	CGTTCGCCAAAA	C	frameshift_variant	HIGH	F46G11.1
406	III	2210647	C	CTGAAATTAGAATAATAACA	upstream_gene_variant	MODIFIER	C39B5.14
406	III	5433051	GA	G	intron_variant	MODIFIER	W03A5.4
406	III	9184268	AAACTTC	A	conservative_inframe_deletion	MODERATE	tax-4
406	III	12629522	C	CA	downstream_gene_variant	MODIFIER	Y111B2A.13
406	IV	3161314	CCCTTCCCCGAGAACT	C	upstream_gene_variant	MODIFIER	T23E1.5
406	IV	10951578	AT	A	upstream_gene_variant	MODIFIER	Y69E1A.1
406	I	2106512	GA	G	downstream_gene_variant	MODIFIER	Y37E3.19
406	I	6531058	AT	A	upstream_gene_variant	MODIFIER	T10E9.6
406	I	9190946	GT	G	intron_variant	MODIFIER	lim-9
406	I	14026598	T	TA	upstream_gene_variant	MODIFIER	ins-27
406	II	2751450	CA	C	upstream_gene_variant	MODIFIER	F29A7.5
406	II	14540609	CA	C	upstream_gene_variant	MODIFIER	clec-147
406	V	19488115	ATT	A	upstream_gene_variant	MODIFIER	Y43F8B.7
406	X	4596735	C	CGTTCCA	disruptive_inframe_insertion	MODERATE	spat-3
406	X	5391987	CA	C	upstream_gene_variant	MODIFIER	C03F11.6
406	X	8042543	GT	G	upstream_gene_variant	MODIFIER	C18A11.4
406	X	12905028	G	GA	upstream_gene_variant	MODIFIER	K02A4.15
410	III	738511	TA	T	upstream_gene_variant	MODIFIER	T17H7.1
410	III	5415016	G	GA	upstream_gene_variant	MODIFIER	grl-22
410	III	6542852	ATATCAT	A	upstream_gene_variant	MODIFIER	C09E7.5
410	III	11269893	C	CCA	upstream_gene_variant	MODIFIER	obr-1
410	III	11683975	TC	T	intron_variant	MODIFIER	crh-1
410	IV	1692688	GATA	G	upstream_gene_variant	MODIFIER	Y41D4B.28
410	IV	4709041	A	AT	upstream_gene_variant	MODIFIER	K08F11.8
410	IV	6391147	AT	A	upstream_gene_variant	MODIFIER	21ur-12358
410	IV	7091389	AGTT	A	splice_region_variant&intron_variant	LOW	deb-1
410	IV	8772270	GA	G	splice_region_variant&intron_variant	LOW	F20C5.6
410	IV	14705289	G	GT	upstream_gene_variant	MODIFIER	21ur-12359
410	I	2801586	CA	C	upstream_gene_variant	MODIFIER	W03D8.2
410	I	2995936	TTATATTAA	T	upstream_gene_variant	MODIFIER	supr-1
410	I	5028033	T	TC	upstream_gene_variant	MODIFIER	lfe-2
410	II	8260217	GT	G	upstream_gene_variant	MODIFIER	F35C11.12
410	II	9966313	GTTTCAAATTTTTAA	G	upstream_gene_variant	MODIFIER	R53.11
410	V	7784929	TGGA	T	upstream_gene_variant	MODIFIER	C26F1.1
410	V	14189130	T	TA	upstream_gene_variant	MODIFIER	trm-1
410	X	3081082	G	GT	upstream_gene_variant	MODIFIER	F52E4.10
410	X	4122598	G	GA	splice_region_variant&intron_variant	LOW	F09F9.4
414	IV	9791272	CT	C	upstream_gene_variant	MODIFIER	21ur-8989
414	IV	13892660	G	GT	3_prime_UTR_variant	MODIFIER	lin-66
414	IV	14884644	TA	T	upstream_gene_variant	MODIFIER	21ur-7632
414	I	1302552	TTTTTTTTTTG	T	upstream_gene_variant	MODIFIER	dapk-1
414	I	4532212	AT	A	intron_variant	MODIFIER	bet-1
414	I	6532434	G	GAAAAAAAAAGAAAAA	conservative_inframe_insertion	MODERATE	nuo-2
414	II	1614835	ACGGGGATCG	A	disruptive_inframe_deletion	MODERATE	fbxa-165
414	II	10558319	TGCC	T	upstream_gene_variant	MODIFIER	mnk-1
414	X	7700554	GA	G	upstream_gene_variant	MODIFIER	kvs-1
415	III	3478240	GTCAGTTTAAGGTAAAGTGCTGCTTAAAAGT	G	upstream_gene_variant	MODIFIER	C34C12.9
415	IV	15795467	A	AT	upstream_gene_variant	MODIFIER	21ur-15662
415	II	1127612	AT	A	upstream_gene_variant	MODIFIER	sut-1
415	II	5532594	CA	C	upstream_gene_variant	MODIFIER	C17C3.9
415	II	10426960	T	TAG	upstream_gene_variant	MODIFIER	E04D5.2
415	V	679827	T	TCTTTTTTTCAGATA	upstream_gene_variant	MODIFIER	fbxa-72
415	V	9041546	GA	G	upstream_gene_variant	MODIFIER	nhr-30
415	V	15156698	AGGCAGC	A	conservative_inframe_deletion	MODERATE	T09F5.t1
415	X	987244	TTAGCAATATC	T	frameshift_variant	HIGH	dgk-1
415	X	7016317	AT	A	upstream_gene_variant	MODIFIER	R173.5
419	III	10232632	G	GAGT	conservative_inframe_insertion	MODERATE	Y70G10A.2
419	I	14309018	AT	A	upstream_gene_variant	MODIFIER	F49B2.3
419	II	13063540	T	TCA	upstream_gene_variant	MODIFIER	F42G4.10
419	V	7594220	TGAC	T	disruptive_inframe_deletion	MODERATE	C50E3.5
419	V	16854839	G	GT	splice_donor_variant&intron_variant	HIGH	clec-27
420	III	6113222	ATTG	A	downstream_gene_variant	MODIFIER	nmt-1
420	III	6113226	AAAGACTGT	A	downstream_gene_variant	MODIFIER	nmt-1
420	III	6187655	AT	A	upstream_gene_variant	MODIFIER	nas-28
420	III	10502618	C	CT	upstream_gene_variant	MODIFIER	urm-1
420	IV	7832023	C	CA	upstream_gene_variant	MODIFIER	C06A6.4
420	IV	10599649	TC	T	upstream_gene_variant	MODIFIER	R09H10.1
420	IV	12761171	GA	G	upstream_gene_variant	MODIFIER	flp-9
420	IV	15625744	GT	G	upstream_gene_variant	MODIFIER	21ur-9187
420	I	520464	GT	G	5_prime_UTR_variant	MODIFIER	Y65B4BL.6
420	I	2475819	CAA	C	upstream_gene_variant	MODIFIER	Y74C10AL.2
420	I	11283649	TA	T	upstream_gene_variant	MODIFIER	madf-2
420	I	11613777	GA	G	upstream_gene_variant	MODIFIER	C17D12.7
420	II	2356762	GT	G	upstream_gene_variant	MODIFIER	F43C11.13
420	II	4730051	TG	T	upstream_gene_variant	MODIFIER	F10G7.10
420	II	8606209	AT	A	splice_region_variant&intron_variant	LOW	suf-1
420	V	7625146	G	GT	upstream_gene_variant	MODIFIER	C50E3.12
420	V	11693750	AT	A	upstream_gene_variant	MODIFIER	W05E10.1
420	V	20710135	CT	C	upstream_gene_variant	MODIFIER	Y44A6C.3
420	X	6742234	T	TAC	upstream_gene_variant	MODIFIER	mdl-1
420	X	10675134	CT	C	upstream_gene_variant	MODIFIER	F13E6.2
420	X	10802059	A	AAT	upstream_gene_variant	MODIFIER	F31B12.4
420	X	14556051	G	GT	upstream_gene_variant	MODIFIER	nhr-3
423	III	335165	AT	A	downstream_gene_variant	MODIFIER	Y50D7A.8
423	III	1401751	A	ACTCTTTCATTG	upstream_gene_variant	MODIFIER	Y82E9BR.23
423	III	1537255	CG	C	upstream_gene_variant	MODIFIER	snf-6
423	III	1537292	GA	G	upstream_gene_variant	MODIFIER	snf-6
423	III	2486627	T	TTC	upstream_gene_variant	MODIFIER	Y54F10AL.1
423	III	3999966	G	GA	upstream_gene_variant	MODIFIER	C36E8.11
423	IV	750156	CT	C	downstream_gene_variant	MODIFIER	Y55F3C.13
423	IV	2883984	A	AT	upstream_gene_variant	MODIFIER	dml-1
423	I	2634987	A	ACCC	upstream_gene_variant	MODIFIER	F40E3.7
423	I	8928401	GA	G	upstream_gene_variant	MODIFIER	tsp-15
423	I	11888401	TACCAGCAAAA	T	downstream_gene_variant	MODIFIER	dnj-27
423	I	11888413	TGAGC	T	downstream_gene_variant	MODIFIER	dnj-27
423	II	7671157	ATT	A	upstream_gene_variant	MODIFIER	lir-1
423	V	410724	AATACATGT	A	downstream_gene_variant	MODIFIER	nhr-252
423	V	2299729	T	TTTA	downstream_gene_variant	MODIFIER	nhr-115
423	V	2299799	CGACG	C	downstream_gene_variant	MODIFIER	nhr-226
423	V	8248087	TGC	T	upstream_gene_variant	MODIFIER	C16D9.5
423	V	10409597	AT	A	upstream_gene_variant	MODIFIER	F15H10.7
423	V	12016721	AT	A	upstream_gene_variant	MODIFIER	add-2
423	V	12731881	ATT	A	frameshift_variant	HIGH	dhs-21
423	V	18112064	GA	G	upstream_gene_variant	MODIFIER	Y37H2A.17
423	V	19604891	TA	T	upstream_gene_variant	MODIFIER	nlp-25
423	X	2883402	GT	G	upstream_gene_variant	MODIFIER	F53B3.5
423	X	14208987	TA	T	upstream_gene_variant	MODIFIER	K06G5.9
425	III	313809	GAAAATTTATTTTTGAAA	G	3_prime_UTR_variant	MODIFIER	Y50D7A.1
425	III	4701918	CG	C	upstream_gene_variant	MODIFIER	sel-13
425	III	4748916	TCCAGGACCAGGAGGTCCA	T	disruptive_inframe_deletion	MODERATE	col-89
425	IV	1471395	CA	C	downstream_gene_variant	MODIFIER	Y77E11A.t3
425	IV	15667475	C	CACATGCAA	upstream_gene_variant	MODIFIER	21ur-6036
425	I	3458391	TCTAAAAATGG	T	downstream_gene_variant	MODIFIER	Y47G6A.14
425	I	10805629	TA	T	upstream_gene_variant	MODIFIER	C35E7.9
425	I	14540504	GA	G	intron_variant	MODIFIER	zoo-1
425	II	11746166	G	GTTT	upstream_gene_variant	MODIFIER	F13D12.11
425	V	8682441	CT	C	upstream_gene_variant	MODIFIER	cln-3.3
425	V	13492601	CAA	C	upstream_gene_variant	MODIFIER	T10G3.3
425	X	8886079	T	TTTGA	upstream_gene_variant	MODIFIER	C06E2.12
425	X	11689660	CCTGG	C	upstream_gene_variant	MODIFIER	C44C10.7
425	X	11689667	TG	T	upstream_gene_variant	MODIFIER	C44C10.7
425	X	11689671	TTG	T	upstream_gene_variant	MODIFIER	C44C10.7
425	X	11689674	CTCTCGG	C	upstream_gene_variant	MODIFIER	C44C10.7
425	X	11689682	CTGTTTTGTCGTCTAGAGAAATATCT	C	upstream_gene_variant	MODIFIER	C44C10.7
426	III	3481076	AG	A	upstream_gene_variant	MODIFIER	C34C12.11
426	III	3860866	AAATTCGGCAAATTTGCCGAGCTCGGCT	A	upstream_gene_variant	MODIFIER	acs-19
426	III	3957988	TC	T	3_prime_UTR_variant	MODIFIER	F37A8.5
426	III	7534343	GT	G	upstream_gene_variant	MODIFIER	C07H6.16
426	III	8224852	GT	G	upstream_gene_variant	MODIFIER	C30A5.3
426	IV	9542316	T	TA	upstream_gene_variant	MODIFIER	F56H11.12
426	I	1288145	TAGG	T	downstream_gene_variant	MODIFIER	Y48G8AR.2
426	II	533594	T	TTTC	upstream_gene_variant	MODIFIER	T27A1.2
426	II	3781333	C	CA	upstream_gene_variant	MODIFIER	T24E12.11
426	V	4101247	ATGCTCC	A	upstream_gene_variant	MODIFIER	srj-40
426	V	5872013	A	AT	upstream_gene_variant	MODIFIER	F26F12.4
426	V	17495877	CA	C	frameshift_variant	HIGH	srh-118
426	V	17865849	CAAAACTCGAAATTTTACGTAG	C	intron_variant	MODIFIER	csn-1
426	V	20581840	C	CA	downstream_gene_variant	MODIFIER	clec-263
426	V	20888562	GT	G	downstream_gene_variant	MODIFIER	F25C8.6
426	X	8191867	AT	A	intron_variant	MODIFIER	C17H11.6
428	III	902277	TA	T	3_prime_UTR_variant	MODIFIER	F23H11.4
428	III	11410093	TA	T	upstream_gene_variant	MODIFIER	Y47D3B.19
428	III	12309468	CCCGCATTTTT	C	upstream_gene_variant	MODIFIER	Y75B8A.39
428	IV	10728369	TTATTCCCATGGTTAAGCGGGCTGGGCAGCGCGGGGAGGGCTGCG	T	upstream_gene_variant	MODIFIER	ZC168.2
428	I	246526	CT	C	downstream_gene_variant	MODIFIER	Y48G1BM.2
428	I	1457077	A	AC	upstream_gene_variant	MODIFIER	gst-25
428	I	2375820	CT	C	upstream_gene_variant	MODIFIER	Y39G10AR.27
428	I	10166983	C	CT	upstream_gene_variant	MODIFIER	fkh-10
428	I	12930088	T	TA	upstream_gene_variant	MODIFIER	Y18D10A.22
428	II	741413	CT	C	upstream_gene_variant	MODIFIER	C08G5.1
428	V	11146564	CTAAACATCAGGAAAAAAAT	C	upstream_gene_variant	MODIFIER	C06H2.7
428	V	13713559	AT	A	upstream_gene_variant	MODIFIER	21ur-13168
428	X	7045053	GT	G	upstream_gene_variant	MODIFIER	B0403.14
428	X	7538761	CA	C	upstream_gene_variant	MODIFIER	dpy-7
428	X	16099350	TCA	T	upstream_gene_variant	MODIFIER	ZK1073.2
428	X	16579098	TATTACTCTGGCATAGTCTCTTGTTGGC	T	upstream_gene_variant	MODIFIER	K08B5.6
429	III	1868350	CGA	C	upstream_gene_variant	MODIFIER	Y39A3CR.3
429	III	1868353	CG	C	upstream_gene_variant	MODIFIER	Y39A3CR.3
429	IV	243088	G	GT	upstream_gene_variant	MODIFIER	fnta-1
429	IV	612500	AT	A	upstream_gene_variant	MODIFIER	C18H7.1
429	IV	843716	AT	A	upstream_gene_variant	MODIFIER	Y55F3BR.7
429	IV	1064831	TCCGCGCGGA	T	upstream_gene_variant	MODIFIER	Y55F3AM.14
429	IV	1064842	C	CA	upstream_gene_variant	MODIFIER	Y55F3AM.14
429	IV	1201288	AT	A	downstream_gene_variant	MODIFIER	dsl-2
429	IV	6850911	GGTCA	G	upstream_gene_variant	MODIFIER	21ur-7565
429	IV	16493593	TA	T	splice_region_variant&intron_variant	LOW	Y51H4A.2
429	I	3141434	A	AT	upstream_gene_variant	MODIFIER	K09H9.8
429	I	6870889	CGA	C	frameshift_variant	HIGH	T21G5.2
429	I	6870892	TTTTTCACCAG	T	frameshift_variant	HIGH	T21G5.2
429	I	11006962	GCTCAGA	G	upstream_gene_variant	MODIFIER	Y52B11A.4
429	II	6232801	C	CA	upstream_gene_variant	MODIFIER	C30B5.13
429	II	6596592	AT	A	upstream_gene_variant	MODIFIER	C56C10.9
429	II	9854135	TATCGA	T	frameshift_variant	HIGH	chil-4
429	II	9854144	TTTA	T	disruptive_inframe_deletion	MODERATE	chil-4
429	II	13256145	CACTT	C	upstream_gene_variant	MODIFIER	Y48C3A.1
429	V	13536041	TA	T	upstream_gene_variant	MODIFIER	frpr-5
429	V	19722504	GTTCTGAAGTTCCTGGAACATAAAAAAATT	G	upstream_gene_variant	MODIFIER	Y116F11A.8
429	X	1920056	A	AT	downstream_gene_variant	MODIFIER	rgs-9
429	X	1920068	ACCTCTG	A	downstream_gene_variant	MODIFIER	rgs-9
429	X	15355538	ACTCTGTTCG	A	conservative_inframe_deletion	MODERATE	C33A11.1
429	X	15776922	CCTGAGTTCATGAACA	C	upstream_gene_variant	MODIFIER	Y7A5A.2
429	X	17243126	GTGTT	G	upstream_gene_variant	MODIFIER	21ur-13122
430	III	5463133	AT	A	upstream_gene_variant	MODIFIER	F48E8.2
430	III	6485028	TA	T	upstream_gene_variant	MODIFIER	rpt-3
430	III	13745637	GT	G	upstream_gene_variant	MODIFIER	linc-99
430	IV	1752192	GTCGAA	G	upstream_gene_variant	MODIFIER	Y41D4A.3
430	IV	14309064	CT	C	upstream_gene_variant	MODIFIER	21ur-2884
430	I	10721678	AATGAAT	A	upstream_gene_variant	MODIFIER	B0205.1
430	I	14117366	G	GTATATACACACAATA	conservative_inframe_insertion	MODERATE	Y63D3A.8
430	II	11116899	A	AT	downstream_gene_variant	MODIFIER	W10C6.2
430	II	15176962	T	TAGCAAGGGTCTACAAAA	frameshift_variant&stop_gained	HIGH	Y53F4B.36
430	V	774764	A	AT	3_prime_UTR_variant	MODIFIER	sti-1
430	V	1181022	A	ATACG	upstream_gene_variant	MODIFIER	Y50D4A.8
430	V	4676390	TTTTTG	T	upstream_gene_variant	MODIFIER	K03B4.9
430	V	9748520	ACGTGTG	A	disruptive_inframe_deletion	MODERATE	F58E6.13
430	X	751668	C	CA	downstream_gene_variant	MODIFIER	C02H7.4
430	X	1881024	GGGT	G	upstream_gene_variant	MODIFIER	Y59E1B.t2
430	X	7616272	T	TATAC	upstream_gene_variant	MODIFIER	21ur-13607
430	X	13563918	T	TA	upstream_gene_variant	MODIFIER	R01E6.10
432	III	1665809	CA	C	upstream_gene_variant	MODIFIER	Y22D7AL.16
432	IV	10728882	AT	A	downstream_gene_variant	MODIFIER	orc-5
432	IV	16480736	AATTTAAAAATATCTT	A	upstream_gene_variant	MODIFIER	Y51H4A.1
432	I	2298933	A	AT	upstream_gene_variant	MODIFIER	epg-2
432	I	2785575	C	CA	upstream_gene_variant	MODIFIER	Y71F9B.15
432	I	3447136	GTGC	G	upstream_gene_variant	MODIFIER	Y47G6A.13
432	I	3447142	GCGCGC	G	upstream_gene_variant	MODIFIER	Y47G6A.13
432	I	3447154	GAGAAAT	G	upstream_gene_variant	MODIFIER	Y47G6A.13
432	I	3447164	AGAT	A	upstream_gene_variant	MODIFIER	Y47G6A.13
432	I	4477559	A	AT	upstream_gene_variant	MODIFIER	gcy-28
432	I	10129943	CA	C	3_prime_UTR_variant	MODIFIER	Y106G6D.7
432	I	12157001	T	TA	upstream_gene_variant	MODIFIER	sri-15
432	II	10308629	CA	C	frameshift_variant	HIGH	gcy-4
432	II	12530877	GC	G	upstream_gene_variant	MODIFIER	srx-120
432	II	12590414	TA	T	intron_variant	MODIFIER	ceh-100
432	V	2594366	TC	T	downstream_gene_variant	MODIFIER	C29G2.2
432	V	3903707	AT	A	upstream_gene_variant	MODIFIER	irld-22
432	V	7506436	GAAGATTGC	G	frameshift_variant	HIGH	C04F2.t1
432	V	8319929	ATGTC	A	upstream_gene_variant	MODIFIER	W02D7.1
432	V	13206289	TA	T	upstream_gene_variant	MODIFIER	col-160
432	X	14728647	A	AC	upstream_gene_variant	MODIFIER	F33C8.4
432	X	14728648	T	TAATTTGTCATGTGTTCTAG	upstream_gene_variant	MODIFIER	F33C8.4
432	X	15460235	GT	G	upstream_gene_variant	MODIFIER	sprr-1
435	III	5761651	AGCATC	A	upstream_gene_variant	MODIFIER	B0244.t1
435	III	12178031	AT	A	upstream_gene_variant	MODIFIER	gly-11
435	III	12234588	AT	A	splice_region_variant&intron_variant	LOW	grl-15
435	IV	1624503	AACTACAC	A	upstream_gene_variant	MODIFIER	nhr-146
435	IV	2639385	AT	A	upstream_gene_variant	MODIFIER	Y69A2AR.41
435	IV	10104345	A	AT	downstream_gene_variant	MODIFIER	egl-38
435	IV	16686121	TTTGAAATAACAAG	T	upstream_gene_variant	MODIFIER	Y51H4A.20
435	I	270392	ACC	A	downstream_gene_variant	MODIFIER	21ur-15400
435	I	9278480	GA	G	upstream_gene_variant	MODIFIER	F14B4.2
435	I	11927022	GAA	G	upstream_gene_variant	MODIFIER	fdps-1
435	I	12536300	CTTGCAGAAAAACGTGCAAAA	C	frameshift_variant&splice_acceptor_variant&splice_region_variant&intron_variant	HIGH	hmg-20
435	I	13968490	GGATTTTCATA	G	upstream_gene_variant	MODIFIER	Y71A12B.14
435	II	7106638	TTC	T	splice_region_variant&intron_variant	LOW	F10E7.9
435	V	5779445	CGAT	C	disruptive_inframe_deletion	MODERATE	F44E7.5
435	V	16339259	AGCCTACAAGGCCTACAAT	A	upstream_gene_variant	MODIFIER	F57G8.t4
435	X	9936017	T	TA	upstream_gene_variant	MODIFIER	nra-3
435	X	16481742	G	GATTGAAAAAAGTTA	upstream_gene_variant	MODIFIER	21ur-14875
436	IV	3122271	T	TA	intron_variant	MODIFIER	mca-3
436	IV	8437899	A	ATTCATCT	3_prime_UTR_variant	MODIFIER	T26A8.1
436	IV	8437902	T	TCATTC	3_prime_UTR_variant	MODIFIER	T26A8.1
436	IV	9070378	CA	C	upstream_gene_variant	MODIFIER	mppb-1
436	IV	16779185	TGCTC	T	frameshift_variant	HIGH	Y43D4A.5
436	I	10774582	TTTCGATTA	T	upstream_gene_variant	MODIFIER	R13H8.5
436	I	14464485	A	AT	upstream_gene_variant	MODIFIER	Y105E8A.13
436	II	4174715	G	GT	upstream_gene_variant	MODIFIER	R03H10.5
436	II	6739887	T	TAAAAA	frameshift_variant	HIGH	T14B4.1
436	II	10839919	C	CA	upstream_gene_variant	MODIFIER	M106.6
436	V	20032496	CG	C	downstream_gene_variant	MODIFIER	Y113G7A.19
437	III	494321	CA	C	upstream_gene_variant	MODIFIER	F30H5.7
437	III	5018178	T	TA	upstream_gene_variant	MODIFIER	larp-1
437	III	7329417	ATTATC	A	splice_region_variant&intron_variant	LOW	F56C9.11
437	III	10714045	AT	A	upstream_gene_variant	MODIFIER	W09D10.5
437	IV	1644984	GT	G	upstream_gene_variant	MODIFIER	nhr-274
437	IV	7982255	TGGCTGGACGACATCCAGC	T	upstream_gene_variant	MODIFIER	arf-3
437	IV	9584239	ATTTTACCAACTAAAATATATTT	A	upstream_gene_variant	MODIFIER	npr-2
437	I	2273523	C	CT	upstream_gene_variant	MODIFIER	abt-2
437	II	3275288	G	GGGGA	upstream_gene_variant	MODIFIER	F02E11.3
437	II	3331830	AATT	A	upstream_gene_variant	MODIFIER	Y46D2A.3
437	II	3331963	TGGTAG	T	frameshift_variant&splice_donor_variant&splice_region_variant&intron_variant	HIGH	irld-27
437	II	12257454	TAAAA	T	3_prime_UTR_variant	MODIFIER	Y57A10A.10
437	V	1390506	G	GA	downstream_gene_variant	MODIFIER	Y75B7AR.1
437	V	6918021	CA	C	upstream_gene_variant	MODIFIER	K11C4.9
437	V	19386158	G	GTT	downstream_gene_variant	MODIFIER	srw-84
437	X	9220691	G	GT	upstream_gene_variant	MODIFIER	C35B8.6
437	X	13415590	TA	T	upstream_gene_variant	MODIFIER	C29F7.8
440	III	4944688	GA	G	upstream_gene_variant	MODIFIER	C26E6.14
440	IV	71513	ATTTTCT	A	upstream_gene_variant	MODIFIER	T05C7.8
440	IV	5173188	GA	G	upstream_gene_variant	MODIFIER	21ur-270
440	IV	5670179	GA	G	upstream_gene_variant	MODIFIER	T19E7.22
440	IV	15979935	G	GT	upstream_gene_variant	MODIFIER	21ur-1905
440	II	12717421	GT	G	intron_variant	MODIFIER	tbc-17
440	V	18960767	CA	C	upstream_gene_variant	MODIFIER	Y80D3A.9
440	V	19395401	C	CTA	upstream_gene_variant	MODIFIER	C25F9.t3
440	V	19492493	T	TTA	upstream_gene_variant	MODIFIER	Y43F8B.6
440	V	20206712	AGTG	A	disruptive_inframe_deletion	MODERATE	srbc-34
440	X	397240	TA	T	upstream_gene_variant	MODIFIER	R04A9.7
440	X	1310719	TA	T	upstream_gene_variant	MODIFIER	C52B11.6
440	X	6418075	GCATCGCGTCTGAATATGTCTGAATA	G	upstream_gene_variant	MODIFIER	T22E5.6
443	III	10898961	TAAAAAATTAAA	T	upstream_gene_variant	MODIFIER	unc-119
443	III	13243504	G	GGT	upstream_gene_variant	MODIFIER	Y43F4A.3
443	III	13243506	CAG	C	upstream_gene_variant	MODIFIER	Y43F4A.3
443	III	13243523	G	GTT	upstream_gene_variant	MODIFIER	Y43F4A.3
443	III	13243525	CAG	C	upstream_gene_variant	MODIFIER	Y43F4A.3
443	I	13819865	AC	A	frameshift_variant	HIGH	W09G3.6
443	I	14975707	GA	G	intron_variant	MODIFIER	ZK337.2
443	II	13854689	TA	T	downstream_gene_variant	MODIFIER	F08G2.11
443	V	10701138	A	AC	upstream_gene_variant	MODIFIER	pph-1
443	V	18185056	GT	G	upstream_gene_variant	MODIFIER	C31G12.3
443	X	1896937	GGCAGAT	G	conservative_inframe_deletion	MODERATE	B0294.1
443	X	2124633	G	GT	upstream_gene_variant	MODIFIER	gpa-5
443	X	3509076	GC	G	upstream_gene_variant	MODIFIER	sox-4
443	X	15994886	C	CA	downstream_gene_variant	MODIFIER	C09G1.6
443	X	16797281	CA	C	upstream_gene_variant	MODIFIER	got-1.2
449	IV	1251381	TTA	T	5_prime_UTR_variant	MODIFIER	clec-166
449	IV	11199260	AT	A	upstream_gene_variant	MODIFIER	R07H5.16
449	IV	14132430	GA	G	upstream_gene_variant	MODIFIER	H12I19.115
449	IV	15996333	A	AT	upstream_gene_variant	MODIFIER	21ur-9540
449	I	12473564	CTGAGTTTCCGGATAGAGGAATATCATCTCATTGTATA	C	upstream_gene_variant	MODIFIER	T27F6.1
449	II	3962093	A	AT	upstream_gene_variant	MODIFIER	sea-2
449	V	4618112	T	TA	upstream_gene_variant	MODIFIER	Y61A9LA.10
449	V	10589372	A	AT	upstream_gene_variant	MODIFIER	srg-32
449	V	16012523	AAATAT	A	upstream_gene_variant	MODIFIER	str-231
449	X	5737163	T	TA	upstream_gene_variant	MODIFIER	C41G11.10
449	X	8359837	A	AAG	upstream_gene_variant	MODIFIER	F40B5.6
449	X	14089263	T	TA	upstream_gene_variant	MODIFIER	C33G3.6
449	X	16391989	AT	A	upstream_gene_variant	MODIFIER	let-2
450	III	4267233	T	TTAAATTTTAAAATTTATTC	upstream_gene_variant	MODIFIER	T08A11.1
450	IV	197748	A	AT	downstream_gene_variant	MODIFIER	Y38C1AA.12
450	IV	2743290	T	TA	downstream_gene_variant	MODIFIER	Y94H6A.t1
450	IV	3182364	TCTCATACCTAGGTGCCTAC	T	downstream_gene_variant	MODIFIER	Y67D8B.2
450	IV	13554508	CA	C	upstream_gene_variant	MODIFIER	21ur-9641
450	IV	14120506	C	CA	upstream_gene_variant	MODIFIER	nkcc-1
450	I	10967026	C	CA	upstream_gene_variant	MODIFIER	spe-38
450	X	2605540	AT	A	upstream_gene_variant	MODIFIER	T03G6.1
450	X	16872368	G	GT	upstream_gene_variant	MODIFIER	aakg-2
455	III	2069651	TG	T	upstream_gene_variant	MODIFIER	Y39A3A.3
455	III	10951664	A	AT	downstream_gene_variant	MODIFIER	strd-1
455	IV	3675443	G	GT	downstream_gene_variant	MODIFIER	Y37E11AL.15
455	I	45213	GT	G	upstream_gene_variant	MODIFIER	Y48G1C.12
455	I	1646787	GC	G	downstream_gene_variant	MODIFIER	Y73E7A.8
455	I	7949906	GAA	G	upstream_gene_variant	MODIFIER	T22C1.15
455	I	8424386	C	CA	downstream_gene_variant	MODIFIER	F02E9.5
455	I	14388900	TGG	T	upstream_gene_variant	MODIFIER	unc-95
455	I	14388903	TTA	T	upstream_gene_variant	MODIFIER	unc-95
455	II	9244611	CT	C	downstream_gene_variant	MODIFIER	T26C5.5
455	II	10653313	G	GT	upstream_gene_variant	MODIFIER	nphp-1
455	II	11895582	AT	A	upstream_gene_variant	MODIFIER	ZK930.15
455	V	3119478	CA	C	upstream_gene_variant	MODIFIER	str-242
455	V	5017811	CCCGG	C	upstream_gene_variant	MODIFIER	srr-4
455	V	7103714	GA	G	frameshift_variant	HIGH	odr-2
455	V	18954929	TGTGAAA	T	downstream_gene_variant	MODIFIER	ztf-20
455	X	3704958	TA	T	upstream_gene_variant	MODIFIER	C01C4.6
455	X	9748791	GCAGA	G	frameshift_variant	HIGH	him-4
456	III	4364014	CA	C	upstream_gene_variant	MODIFIER	B0285.15
456	III	6218894	CA	C	upstream_gene_variant	MODIFIER	C23G10.10
456	III	9432853	CGCTCGTTTACTATCGAACG	C	upstream_gene_variant	MODIFIER	cpar-1
456	IV	14644885	TA	T	upstream_gene_variant	MODIFIER	21ur-2858
456	IV	15968899	AAATGAAATGT	A	upstream_gene_variant	MODIFIER	21ur-876
456	I	10042175	C	CA	upstream_gene_variant	MODIFIER	F10G8.12
456	II	545720	T	TA	upstream_gene_variant	MODIFIER	mlt-10
456	V	17225863	AAGC	A	disruptive_inframe_deletion	MODERATE	srh-112
456	X	1243818	AT	A	upstream_gene_variant	MODIFIER	C25G6.3
456	X	4198807	TA	T	3_prime_UTR_variant	MODIFIER	F20B6.5
457	III	9072374	ACTTG	A	upstream_gene_variant	MODIFIER	lin-12
457	IV	16697812	GT	G	upstream_gene_variant	MODIFIER	21ur-10588
457	I	8140081	CCA	C	frameshift_variant&splice_region_variant	HIGH	del-4
457	I	13865977	T	TA	intron_variant	MODIFIER	taf-1
457	II	969719	CT	C	upstream_gene_variant	MODIFIER	fbxc-18
457	II	7016106	A	AT	upstream_gene_variant	MODIFIER	sqv-7
457	V	9414942	TA	T	upstream_gene_variant	MODIFIER	F36D4.t1
457	V	16067309	G	GA	upstream_gene_variant	MODIFIER	F14H3.14
457	V	16476570	AGATT	A	upstream_gene_variant	MODIFIER	21ur-15494
458	III	907664	TC	T	upstream_gene_variant	MODIFIER	F23H11.4
458	III	12607891	AG	A	upstream_gene_variant	MODIFIER	Y111B2A.12
458	IV	665487	C	CT	upstream_gene_variant	MODIFIER	K11H12.7
458	IV	14243605	GT	G	upstream_gene_variant	MODIFIER	Y64G10A.1
458	I	12925823	C	CA	upstream_gene_variant	MODIFIER	Y18D10A.21
458	I	14100482	AT	A	upstream_gene_variant	MODIFIER	fbxb-100
458	II	282203	GA	G	upstream_gene_variant	MODIFIER	B0432.8
458	II	3929558	A	AAC	upstream_gene_variant	MODIFIER	F53C3.13
458	II	10073262	GAAT	G	upstream_gene_variant	MODIFIER	C18D1.17
458	V	11862202	G	GT	3_prime_UTR_variant	MODIFIER	R13H4.5
458	X	1092750	AT	A	upstream_gene_variant	MODIFIER	K03E6.7
458	X	3581042	GT	G	upstream_gene_variant	MODIFIER	T27A10.10
458	X	3902022	TCTGGTGCGTCTGCTTGCCA	T	upstream_gene_variant	MODIFIER	sup-12
458	X	14526028	A	AT	upstream_gene_variant	MODIFIER	nspc-17
461	III	3052851	C	CTA	upstream_gene_variant	MODIFIER	Y55D5A.9
461	III	4392853	CA	C	upstream_gene_variant	MODIFIER	R07E5.4
461	III	5146176	GGA	G	downstream_gene_variant	MODIFIER	21ur-15343
461	III	8192397	AGAATAATG	A	frameshift_variant	HIGH	C50C3.1
461	IV	403904	CTCGGCAAAT	C	downstream_gene_variant	MODIFIER	T07A9.8
461	IV	4261596	CATTTCG	C	upstream_gene_variant	MODIFIER	linc-114
461	IV	4491268	TAG	T	upstream_gene_variant	MODIFIER	ZK180.12
461	IV	15256722	TG	T	upstream_gene_variant	MODIFIER	srj-42
461	I	3799533	A	AT	upstream_gene_variant	MODIFIER	C32E8.9
461	I	7333708	T	TA	non_coding_transcript_exon_variant	MODIFIER	linc-149
461	I	10928533	TA	T	upstream_gene_variant	MODIFIER	F49D11.7
461	II	2972185	GA	G	upstream_gene_variant	MODIFIER	K08A2.13
461	II	9604726	TCTAC	T	downstream_gene_variant	MODIFIER	T15H9.6
461	II	9604733	A	AT	downstream_gene_variant	MODIFIER	T15H9.6
461	II	13121909	GT	G	3_prime_UTR_variant	MODIFIER	gfm-1
461	II	15189324	A	ACT	upstream_gene_variant	MODIFIER	gst-35
461	II	15189325	A	ATTT	upstream_gene_variant	MODIFIER	gst-35
461	X	1961832	TC	T	upstream_gene_variant	MODIFIER	21ur-14662
461	X	9046423	GA	G	splice_region_variant&intron_variant	LOW	F47E1.3
461	X	16995391	AT	A	upstream_gene_variant	MODIFIER	K02H8.6
461	X	17578545	G	GAAT	downstream_gene_variant	MODIFIER	F39B3.3
462	III	5646927	CT	C	upstream_gene_variant	MODIFIER	ckk-1
462	III	7981436	A	AGGC	disruptive_inframe_insertion	MODERATE	clp-1
462	III	12451915	ACGCGCAAG	A	downstream_gene_variant	MODIFIER	scav-3
462	IV	15455573	T	TG	upstream_gene_variant	MODIFIER	Y73F8A.24
462	I	10836102	ATT	A	upstream_gene_variant	MODIFIER	C35E7.3
462	I	13290635	AT	A	upstream_gene_variant	MODIFIER	M01E5.3
462	II	4935390	A	ACC	upstream_gene_variant	MODIFIER	gst-30
462	II	14916413	G	GT	upstream_gene_variant	MODIFIER	pde-3
462	V	1483612	G	GA	3_prime_UTR_variant	MODIFIER	C38C3.4
462	V	1682756	T	TA	upstream_gene_variant	MODIFIER	srw-98
462	V	3800941	ACCGGAGGAT	A	disruptive_inframe_deletion	MODERATE	cyp-33C8
462	V	9934821	T	TTGTAACAATCTATTTTTCG	upstream_gene_variant	MODIFIER	T07C12.12
462	V	16413168	TGAC	T	upstream_gene_variant	MODIFIER	F26D2.8
462	V	19390968	CG	C	upstream_gene_variant	MODIFIER	Y43F8A.5
462	X	10484024	C	CAATGAACG	upstream_gene_variant	MODIFIER	C33D3.6
466	IV	6897583	A	AT	3_prime_UTR_variant	MODIFIER	T05A12.4
466	IV	9069880	AT	A	upstream_gene_variant	MODIFIER	21ur-13434
466	I	2190600	A	AAG	upstream_gene_variant	MODIFIER	afd-1
466	I	7064838	GT	G	upstream_gene_variant	MODIFIER	W01A8.10
466	I	11364376	CA	C	3_prime_UTR_variant	MODIFIER	F56G4.6
466	I	14719613	GCCATTTTTAGTGAAAAATGGT	G	downstream_gene_variant	MODIFIER	Y54E5A.7
466	II	468695	A	AT	upstream_gene_variant	MODIFIER	nfyb-1
466	II	7320460	CAGCAACTGAAAATTTAGTTGTTTTTATTTATTTTT	C	frameshift_variant&splice_acceptor_variant&splice_region_variant&intron_variant	HIGH	F21D12.3
466	V	4160103	C	CT	upstream_gene_variant	MODIFIER	Y45G5AM.5
466	V	5746262	T	TA	upstream_gene_variant	MODIFIER	K09H11.1
466	V	8269722	AT	A	upstream_gene_variant	MODIFIER	F21F8.5
466	V	9320734	TGCTGAATC	T	frameshift_variant	HIGH	kvs-3
466	X	1645686	T	TG	upstream_gene_variant	MODIFIER	ZK380.3
466	X	7168833	AT	A	upstream_gene_variant	MODIFIER	F43E12.5
466	X	8555436	TA	T	upstream_gene_variant	MODIFIER	utx-1
466	X	13050286	C	CA	upstream_gene_variant	MODIFIER	C53C7.t2
466	X	14485492	TA	T	frameshift_variant	HIGH	M163.8
468	III	966442	CTGACCTGCCA	C	downstream_gene_variant	MODIFIER	fbxa-51
468	III	3786600	T	TAG	upstream_gene_variant	MODIFIER	T24A11.10
468	IV	6096296	CAT	C	upstream_gene_variant	MODIFIER	K08B4.7
468	I	177130	CATGTTTATA	C	upstream_gene_variant	MODIFIER	F56C11.5
468	I	8894150	CT	C	upstream_gene_variant	MODIFIER	F55H12.4
468	II	495851	TA	T	upstream_gene_variant	MODIFIER	W07E6.3
468	II	495856	A	AAGC	upstream_gene_variant	MODIFIER	W07E6.3
468	II	495860	A	AGT	upstream_gene_variant	MODIFIER	W07E6.3
468	II	495862	A	ACCCAG	upstream_gene_variant	MODIFIER	W07E6.3
468	II	495866	TCTGGG	T	upstream_gene_variant	MODIFIER	W07E6.3
468	II	495873	TAC	T	upstream_gene_variant	MODIFIER	W07E6.3
468	II	495877	GT	G	upstream_gene_variant	MODIFIER	W07E6.3
468	II	495879	AGCTTC	A	upstream_gene_variant	MODIFIER	W07E6.3
468	II	9314154	TA	T	upstream_gene_variant	MODIFIER	cam-1
468	II	14466828	CA	C	upstream_gene_variant	MODIFIER	mir-234
468	V	13286807	CAT	C	upstream_gene_variant	MODIFIER	C26E1.6
468	V	17956073	TTCTCTGGCTTCACAGTATATTTTAC	T	frameshift_variant&stop_lost	HIGH	gck-3
468	V	18109409	CA	C	upstream_gene_variant	MODIFIER	Y37H2A.17
468	V	20011918	AT	A	upstream_gene_variant	MODIFIER	Y60A3A.21
468	X	10648672	T	TTGGTTTC	intron_variant	MODIFIER	daf-12
468	X	10648673	A	AGCTTATC	intron_variant	MODIFIER	daf-12
470	III	1323734	AAACTGAT	A	5_prime_UTR_variant	MODIFIER	fbxa-14
470	III	4363932	GAGAT	G	upstream_gene_variant	MODIFIER	B0285.15
470	III	11335115	CG	C	upstream_gene_variant	MODIFIER	T28D6.6
470	IV	10865870	GA	G	splice_region_variant&intron_variant	LOW	F13E9.11
470	I	5139775	CCG	C	upstream_gene_variant	MODIFIER	unc-63
470	II	1358036	A	AT	upstream_gene_variant	MODIFIER	C13A10.1
470	II	2628544	TATC	T	upstream_gene_variant	MODIFIER	sri-37
470	II	3132513	CT	C	upstream_gene_variant	MODIFIER	sri-56
470	V	4151688	ACTAGGCTCCTAGGCTC	A	downstream_gene_variant	MODIFIER	Y45G5AL.1
470	X	9071234	AG	A	upstream_gene_variant	MODIFIER	F47E1.1
471	III	1377293	A	AGCC	upstream_gene_variant	MODIFIER	Y82E9BR.10
471	III	8632792	TG	T	splice_region_variant&intron_variant	LOW	dnj-10
471	III	12303844	A	ATAG	upstream_gene_variant	MODIFIER	mrp-8
471	II	3141424	GAGTTCGGTTTTGT	G	frameshift_variant	HIGH	sri-42
471	II	5322022	A	AAGAGAGAGAGAGAG	upstream_gene_variant	MODIFIER	vhp-1
471	V	2963783	AT	A	upstream_gene_variant	MODIFIER	srw-144
471	V	6141600	A	ATATG	5_prime_UTR_variant	MODIFIER	exp-2
471	V	7952897	TA	T	frameshift_variant	HIGH	clec-216
471	V	7986332	CGA	C	upstream_gene_variant	MODIFIER	Y97E10AL.3
471	V	17603310	GC	G	upstream_gene_variant	MODIFIER	Y6G8.2
471	V	17842373	TTTTTTTGCTATGGTTTAATG	T	upstream_gene_variant	MODIFIER	srh-302
471	X	15201656	GTGAAGTTTGGCTCCGCCCATGTAAAAATCATTACAGAAATTTTA	G	upstream_gene_variant	MODIFIER	snt-7
474	III	234997	AAAACGT	A	conservative_inframe_deletion	MODERATE	hpo-38
474	III	2656271	GA	G	upstream_gene_variant	MODIFIER	H19M22.4
474	III	6884004	T	TTAGTC	upstream_gene_variant	MODIFIER	med-2
474	IV	16957327	A	AT	intron_variant	MODIFIER	Y116A8C.13
474	II	256683	ACTTCTC	A	upstream_gene_variant	MODIFIER	pqn-85
474	II	256695	A	AATT	upstream_gene_variant	MODIFIER	pqn-85
474	II	11669903	C	CA	intron_variant	MODIFIER	trr-1
474	V	880640	GCA	G	upstream_gene_variant	MODIFIER	T02B11.8
474	V	8902131	GACATA	G	3_prime_UTR_variant	MODIFIER	frpr-13
474	V	20736542	AAT	A	downstream_gene_variant	MODIFIER	srxa-1
474	X	3016069	T	TA	upstream_gene_variant	MODIFIER	flp-18
474	X	11266750	AGAT	A	upstream_gene_variant	MODIFIER	ifa-1
474	X	11468246	A	AT	upstream_gene_variant	MODIFIER	T25C12.8
475	III	1130302	CTTGT	C	intron_variant	MODIFIER	Y71D11A.3
475	III	1130307	AGGGG	A	intron_variant	MODIFIER	Y71D11A.3
475	III	4795408	AT	A	3_prime_UTR_variant	MODIFIER	C38D4.4
475	III	6797714	AT	A	3_prime_UTR_variant	MODIFIER	R05H11.1
475	IV	16773028	A	AT	upstream_gene_variant	MODIFIER	Y43D4A.8
475	I	6333635	TC	T	downstream_gene_variant	MODIFIER	F26B1.8
475	I	9943713	AT	A	upstream_gene_variant	MODIFIER	Y106G6A.6
475	I	11848968	TG	T	downstream_gene_variant	MODIFIER	ced-1
475	I	14131997	GCCGGA	G	downstream_gene_variant	MODIFIER	mys-2
475	II	1394598	GA	G	upstream_gene_variant	MODIFIER	F54D12.11
475	II	7434564	AT	A	upstream_gene_variant	MODIFIER	kcc-3
475	II	7434567	AT	A	upstream_gene_variant	MODIFIER	kcc-3
475	V	161199	C	CA	downstream_gene_variant	MODIFIER	Y108G3AL.3
475	V	4766969	ACT	A	upstream_gene_variant	MODIFIER	C18G1.8
475	V	9295855	C	CCA	upstream_gene_variant	MODIFIER	ZK682.7
475	V	13266416	GTACC	G	upstream_gene_variant	MODIFIER	zip-5
475	V	15121016	CTCTTT	C	upstream_gene_variant	MODIFIER	T01G5.1
475	X	1487548	ATT	A	upstream_gene_variant	MODIFIER	D1005.4
475	X	8876574	AACGATAC	A	upstream_gene_variant	MODIFIER	C06E2.1
475	X	13724805	T	TTTATA	frameshift_variant	HIGH	K11E4.6
475	X	13724807	TGG	T	frameshift_variant	HIGH	K11E4.6
475	X	13724810	G	GTTCTTTCTA	disruptive_inframe_insertion	MODERATE	K11E4.6
475	X	13724819	G	GTT	frameshift_variant	HIGH	K11E4.6
475	X	13724821	TG	T	frameshift_variant	HIGH	K11E4.6
475	X	13724825	C	CT	frameshift_variant	HIGH	K11E4.6
476	III	11444292	TA	T	upstream_gene_variant	MODIFIER	sbp-1
476	IV	3695913	GATTTTGAAAAGA	G	upstream_gene_variant	MODIFIER	taf-6.2
476	IV	14444239	GA	G	upstream_gene_variant	MODIFIER	tra-3
476	I	5959024	TTTTATTGGCG	T	frameshift_variant&stop_lost	HIGH	B0207.10
476	I	5959038	ACG	A	frameshift_variant	HIGH	B0207.10
476	I	5959048	ATTTGT	A	frameshift_variant	HIGH	B0207.10
476	I	5959055	CA	C	frameshift_variant	HIGH	B0207.10
476	I	5959058	GA	G	frameshift_variant	HIGH	B0207.10
476	II	9717266	AATAAAACAGGAAAATTTT	A	upstream_gene_variant	MODIFIER	Y53C12A.t1
476	II	13979194	CT	C	upstream_gene_variant	MODIFIER	Y39G8B.2
476	X	5013176	C	CAA	upstream_gene_variant	MODIFIER	ZC449.7
476	X	8820551	TA	T	upstream_gene_variant	MODIFIER	R04E5.t5
476	X	8971229	T	TTCC	upstream_gene_variant	MODIFIER	C48C5.t3
477	IV	3794488	G	GT	upstream_gene_variant	MODIFIER	K09B3.1
477	IV	5513208	G	GT	upstream_gene_variant	MODIFIER	21ur-1966
477	IV	5513232	TTAAATAAA	T	upstream_gene_variant	MODIFIER	21ur-1966
477	IV	5513244	GC	G	upstream_gene_variant	MODIFIER	21ur-1966
477	I	7474930	T	TCA	upstream_gene_variant	MODIFIER	T28F4.7
477	I	11549124	G	GT	upstream_gene_variant	MODIFIER	dys-1
477	V	661801	T	TTATG	upstream_gene_variant	MODIFIER	srh-246
477	V	1228702	AT	A	downstream_gene_variant	MODIFIER	C39F7.8
477	V	15199410	GTGATGGC	G	upstream_gene_variant	MODIFIER	Y75B12B.10
477	V	15236205	CAT	C	upstream_gene_variant	MODIFIER	nhr-164
477	V	18554658	CT	C	upstream_gene_variant	MODIFIER	Y51A2D.8
477	V	19661055	TC	T	downstream_gene_variant	MODIFIER	Y43F8C.t4
477	V	19942051	CTT	C	downstream_gene_variant	MODIFIER	Y60A3A.11
477	V	20314041	A	AT	upstream_gene_variant	MODIFIER	Y113G7C.1
477	V	20341016	GA	G	upstream_gene_variant	MODIFIER	Y38H6A.7
477	X	2524467	TA	T	upstream_gene_variant	MODIFIER	R11B5.6
477	X	2905787	CT	C	upstream_gene_variant	MODIFIER	F52B10.9
480	III	3656000	GT	G	downstream_gene_variant	MODIFIER	gsr-1
480	III	8897348	CTATTCCAAATA	C	downstream_gene_variant	MODIFIER	tag-256
480	IV	2545986	TGGG	T	downstream_gene_variant	MODIFIER	21ur-12508
480	IV	2953517	CTATTTATGATTCT	C	intergenic_region	MODIFIER	Y54G2A.24-ser-6
480	IV	11984945	TAGG	T	conservative_inframe_deletion	MODERATE	unc-22
480	II	1299489	AG	A	downstream_gene_variant	MODIFIER	Y57G7A.2
480	II	7820132	G	GT	3_prime_UTR_variant	MODIFIER	cki-2
480	II	10241450	A	AT	upstream_gene_variant	MODIFIER	mec-15
480	II	13882885	GA	G	downstream_gene_variant	MODIFIER	ing-3
480	V	8673558	CA	C	upstream_gene_variant	MODIFIER	ZC190.12
480	X	10769118	GT	G	upstream_gene_variant	MODIFIER	sma-9
481	III	150988	T	TA	splice_region_variant&intron_variant	LOW	srz-7
481	III	213016	A	AT	downstream_gene_variant	MODIFIER	F40G9.17
481	III	3003629	TA	T	downstream_gene_variant	MODIFIER	daf-2
481	III	5696302	GT	G	upstream_gene_variant	MODIFIER	abi-1
481	III	11460142	G	GA	upstream_gene_variant	MODIFIER	Y47D3B.18
481	III	13116341	AAAAAAATGTGC	A	upstream_gene_variant	MODIFIER	zig-8
481	III	13344868	C	CT	upstream_gene_variant	MODIFIER	F53A2.7
481	IV	1438689	A	ATATATG	upstream_gene_variant	MODIFIER	clp-6
481	IV	2012111	GT	G	upstream_gene_variant	MODIFIER	cpsf-1
481	IV	2142176	GT	G	upstream_gene_variant	MODIFIER	C54E4.12
481	IV	2815821	CTGG	C	conservative_inframe_deletion	MODERATE	Y54G2A.13
481	IV	3719698	G	GT	upstream_gene_variant	MODIFIER	Y37E11AM.3
481	IV	5823524	CTTGGAATGATT	C	upstream_gene_variant	MODIFIER	C10G6.51
481	IV	8835061	TA	T	frameshift_variant	HIGH	T28C6.7
481	IV	9694690	A	AT	downstream_gene_variant	MODIFIER	sdz-36
481	IV	11628445	A	AT	upstream_gene_variant	MODIFIER	lys-5
481	IV	12785348	CT	C	upstream_gene_variant	MODIFIER	ZK897.8
481	IV	12813960	A	AGT	upstream_gene_variant	MODIFIER	F07C6.4
481	IV	14719057	CA	C	upstream_gene_variant	MODIFIER	21ur-3981
481	IV	15986185	A	AT	upstream_gene_variant	MODIFIER	21ur-7328
481	IV	16689741	CA	C	upstream_gene_variant	MODIFIER	21ur-2140
481	I	1837041	GCCAACCAA	G	upstream_gene_variant	MODIFIER	C53H9.3
481	I	8423317	CA	C	downstream_gene_variant	MODIFIER	F02E9.5
481	I	13356011	CA	C	downstream_gene_variant	MODIFIER	sptf-3
481	I	14023588	TA	T	upstream_gene_variant	MODIFIER	ins-27
481	I	14210424	GA	G	splice_region_variant&intron_variant	LOW	best-10
481	II	11626430	GTCCTGA	G	conservative_inframe_deletion	MODERATE	din-1
481	V	5281611	GT	G	upstream_gene_variant	MODIFIER	B0238.9
481	V	15087306	GAGATCAAAGCGAAGTTTATGTTTTCCCCTCTTTACTCGAAT	G	upstream_gene_variant	MODIFIER	C01G10.10
481	V	16805715	TAC	T	downstream_gene_variant	MODIFIER	ctps-1
481	V	16918726	A	AT	upstream_gene_variant	MODIFIER	F09C6.10
481	X	1092602	TA	T	upstream_gene_variant	MODIFIER	K03E6.7
481	X	2526840	GGTCAC	G	frameshift_variant	HIGH	tbc-12
481	X	3442738	AT	A	upstream_gene_variant	MODIFIER	ZK813.8
481	X	5107121	C	CA	upstream_gene_variant	MODIFIER	C42D8.9
481	X	8643874	G	GT	upstream_gene_variant	MODIFIER	F12D9.t5
481	X	8995231	C	CT	upstream_gene_variant	MODIFIER	C24A3.12
481	X	10494768	GA	G	upstream_gene_variant	MODIFIER	C33D3.2
481	X	11078895	T	TA	upstream_gene_variant	MODIFIER	W04G3.12
481	X	14675053	G	GT	upstream_gene_variant	MODIFIER	C26G2.t1
481	X	14882273	GT	G	3_prime_UTR_variant	MODIFIER	flp-8
481	X	14923377	A	AT	upstream_gene_variant	MODIFIER	Y70D2A.3
481	X	17666693	G	GA	upstream_gene_variant	MODIFIER	T23E7.8
482	III	4359465	CGGACT	C	upstream_gene_variant	MODIFIER	B0285.t1
482	III	9248925	TAC	T	upstream_gene_variant	MODIFIER	T02C1.2
482	III	9758275	TCCA	T	upstream_gene_variant	MODIFIER	vps-53
482	III	12038469	T	TA	upstream_gene_variant	MODIFIER	Y79H2A.4
482	IV	14781973	G	GTTCGT	frameshift_variant	HIGH	Y57G11C.8
482	II	8574431	T	TA	frameshift_variant	HIGH	F54C9.7
482	II	10086348	GT	G	upstream_gene_variant	MODIFIER	C18D1.11
482	V	1879423	TC	T	downstream_gene_variant	MODIFIER	cct-7
482	V	17703711	A	AT	upstream_gene_variant	MODIFIER	Y26G10.4
483	III	1128175	C	CA	intron_variant	MODIFIER	Y71D11A.3
483	IV	10819480	CT	C	upstream_gene_variant	MODIFIER	miz-1
483	IV	17277706	TCGGC	T	3_prime_UTR_variant	MODIFIER	clec-196
483	IV	17277719	TGA	T	3_prime_UTR_variant	MODIFIER	clec-196
483	IV	17277725	A	ATT	3_prime_UTR_variant	MODIFIER	clec-196
483	IV	17277734	A	ATTCATTCAG	3_prime_UTR_variant	MODIFIER	clec-196
483	IV	17277738	T	TAGAGCCG	3_prime_UTR_variant	MODIFIER	clec-196
483	II	1520202	CTTGGAGAAATCGATGATGATTTA	C	frameshift_variant	HIGH	Y51H7BR.8
483	II	12646509	CT	C	downstream_gene_variant	MODIFIER	nhr-235
483	II	12700860	T	TA	intron_variant	MODIFIER	tbc-17
483	V	7508518	C	CAAT	upstream_gene_variant	MODIFIER	srh-229
483	V	11511897	CGAAGAG	C	disruptive_inframe_deletion	MODERATE	ttll-5
483	V	18293350	G	GA	upstream_gene_variant	MODIFIER	Y51A2A.2
483	X	273381	AT	A	upstream_gene_variant	MODIFIER	math-43
483	X	3008869	CT	C	upstream_gene_variant	MODIFIER	mir-249
483	X	16245607	C	CT	upstream_gene_variant	MODIFIER	F23A7.6
484	III	1115770	A	ATTTTTTTTTTTT	upstream_gene_variant	MODIFIER	Y71D11A.3
484	III	7156011	GAA	G	upstream_gene_variant	MODIFIER	ogt-1
484	III	12430998	A	AT	upstream_gene_variant	MODIFIER	Y49E10.27
484	IV	614283	AT	A	upstream_gene_variant	MODIFIER	C18H7.1
484	IV	12902590	GA	G	upstream_gene_variant	MODIFIER	K08D8.2
484	IV	13885184	CGTAG	C	upstream_gene_variant	MODIFIER	21ur-14559
484	I	9891403	TA	T	frameshift_variant	HIGH	2020-10-01
484	I	13777851	AGT	A	upstream_gene_variant	MODIFIER	Y37H9A.3
484	II	1579406	A	ACAT	upstream_gene_variant	MODIFIER	K05F6.10
484	II	10588321	T	TA	upstream_gene_variant	MODIFIER	crn-5
484	X	13994926	G	GT	upstream_gene_variant	MODIFIER	21ur-14064
484	X	16500757	T	TA	upstream_gene_variant	MODIFIER	K05G3.1
486	III	3867619	TCCCAA	T	upstream_gene_variant	MODIFIER	brc-1
486	IV	6165322	G	GT	upstream_gene_variant	MODIFIER	21ur-2707
486	IV	12539257	C	CT	upstream_gene_variant	MODIFIER	F53B2.14
486	I	2808288	TCTCAAACCGTTAATTATCGTTGCAATAAGG	T	disruptive_inframe_deletion	MODERATE	itx-1
486	I	14746759	A	AT	downstream_gene_variant	MODIFIER	hmp-2
486	V	8948257	AT	A	upstream_gene_variant	MODIFIER	T19A5.3
486	V	10687661	ATG	A	upstream_gene_variant	MODIFIER	F29F11.20
486	V	20342251	T	TA	upstream_gene_variant	MODIFIER	Y38H6A.7
486	X	66091	A	AT	upstream_gene_variant	MODIFIER	Y73B3A.2
486	X	2773246	TA	T	upstream_gene_variant	MODIFIER	F55F1.2
486	X	5797370	A	ATTTGAAAATC	upstream_gene_variant	MODIFIER	F46G11.10
486	X	5797373	G	GAAAAT	upstream_gene_variant	MODIFIER	F46G11.10
486	X	5797374	CG	C	upstream_gene_variant	MODIFIER	F46G11.10
486	X	15231396	C	CT	upstream_gene_variant	MODIFIER	H03A11.2
486	X	17515422	G	GC	upstream_gene_variant	MODIFIER	nhr-1
488	III	1001587	ACT	A	splice_region_variant&intron_variant	LOW	trp-2
488	III	8981310	GATGA	G	frameshift_variant	HIGH	pde-2
488	IV	7978625	CA	C	frameshift_variant	HIGH	ora-1
488	I	1489599	AATCGAT	A	upstream_gene_variant	MODIFIER	21ur-13232
488	II	1275815	ACG	A	frameshift_variant	HIGH	Y57G7A.11
488	V	4587273	TC	T	downstream_gene_variant	MODIFIER	Y61A9LA.3
488	V	5233065	CAAAACCTCCACCATGA	C	frameshift_variant	HIGH	C52A10.1
488	V	10255426	G	GT	upstream_gene_variant	MODIFIER	rop-1
488	V	10645402	GT	G	upstream_gene_variant	MODIFIER	C32C4.15
488	X	5740854	G	GA	upstream_gene_variant	MODIFIER	21ur-14574
488	X	8032037	C	CA	upstream_gene_variant	MODIFIER	C18A11.13
488	X	8295607	TACAGCAACCTTCCGGA	T	frameshift_variant	HIGH	R09F10.3
488	X	12861643	TA	T	downstream_gene_variant	MODIFIER	T14G8.2
488	X	14952712	G	GGA	upstream_gene_variant	MODIFIER	F45B8.13
489	III	4234073	GA	G	upstream_gene_variant	MODIFIER	nhr-20
489	IV	2316754	GATCGAA	G	upstream_gene_variant	MODIFIER	vha-11
489	IV	5279689	AG	A	upstream_gene_variant	MODIFIER	F36H12.17
489	IV	14379073	AG	A	frameshift_variant	HIGH	Y67A10A.7
489	I	2099019	T	TA	intron_variant	MODIFIER	npp-13
489	I	9183304	CTTATA	C	frameshift_variant	HIGH	lim-9
489	I	13648316	TCAATGGGAC	T	conservative_inframe_deletion	MODERATE	dkf-1
489	II	3712559	G	GCCACAAAAA	upstream_gene_variant	MODIFIER	fbxc-52
489	II	8265830	T	TGCTCTAGC	frameshift_variant	HIGH	K01C8.1
489	II	10237863	C	CT	upstream_gene_variant	MODIFIER	ubxn-5
489	II	14398414	G	GA	upstream_gene_variant	MODIFIER	nurf-1
489	V	3142048	GA	G	upstream_gene_variant	MODIFIER	irld-3
489	V	4161363	ATTTTTGTTCTTT	A	upstream_gene_variant	MODIFIER	Y45G5AM.10
489	V	5495899	TA	T	downstream_gene_variant	MODIFIER	T05C3.6
489	X	4746680	CA	C	intron_variant	MODIFIER	lon-2
489	X	9043621	AT	A	upstream_gene_variant	MODIFIER	F47E1.3
490	III	12141371	ATT	A	upstream_gene_variant	MODIFIER	Y75B8A.59
490	IV	2984102	AT	A	upstream_gene_variant	MODIFIER	Y54G2A.59
490	IV	10357448	T	TTC	upstream_gene_variant	MODIFIER	R11A8.1
490	IV	10357451	GAAA	G	upstream_gene_variant	MODIFIER	R11A8.1
490	IV	12420984	T	TCTCATTGCCTACCCTTG	upstream_gene_variant	MODIFIER	F08G5.t3
490	IV	13499718	GAAAAGCGCCA	G	upstream_gene_variant	MODIFIER	tbc-9
490	IV	13499738	A	ATTCCG	upstream_gene_variant	MODIFIER	tbc-9
490	I	1841224	TC	T	3_prime_UTR_variant	MODIFIER	egl-30
490	I	10594124	CG	C	upstream_gene_variant	MODIFIER	T22A3.11
490	I	14494710	C	CA	downstream_gene_variant	MODIFIER	Y105E8A.28
490	II	5779954	GT	G	upstream_gene_variant	MODIFIER	F10C1.16
490	II	13851054	TCGAC	T	upstream_gene_variant	MODIFIER	F08G2.16
490	II	14388490	A	AT	upstream_gene_variant	MODIFIER	F26H11.8
490	II	15102133	TTTAAATTAAATA	T	intron_variant	MODIFIER	Y53F4B.21
490	V	446715	CAT	C	upstream_gene_variant	MODIFIER	srh-33
490	V	1308014	ATTT	A	intergenic_region	MODIFIER	egl-2-F16B3.2
490	V	2169969	GT	G	upstream_gene_variant	MODIFIER	srbc-19
490	V	4138666	ATT	A	upstream_gene_variant	MODIFIER	lgc-29
490	V	4819372	AATTTAT	A	upstream_gene_variant	MODIFIER	R02F11.4
490	V	9556227	A	AT	upstream_gene_variant	MODIFIER	21ur-12258
490	V	12450728	A	AAAATAGC	upstream_gene_variant	MODIFIER	C54D10.8
490	V	13793575	T	TAAAAAA	upstream_gene_variant	MODIFIER	twk-32
490	V	15001991	C	CAAAAACG	upstream_gene_variant	MODIFIER	T01C3.13
490	V	17349622	AT	A	upstream_gene_variant	MODIFIER	fbxa-188
490	V	19369933	A	ACATTTCACCACTTT	upstream_gene_variant	MODIFIER	Y43F8A.1
490	V	20818063	G	GT	frameshift_variant	HIGH	T03D8.6
490	V	20818068	AGG	A	frameshift_variant	HIGH	T03D8.6
490	V	20818073	TGATCCAATGTCTGTAA	T	frameshift_variant&splice_acceptor_variant&splice_region_variant&intron_variant	HIGH	T03D8.6
490	X	2657855	TAAAAAATTC	T	upstream_gene_variant	MODIFIER	C09B7.3
490	X	12034043	TATTCTTCC	T	upstream_gene_variant	MODIFIER	tsp-20
490	X	17209376	GAAAA	G	upstream_gene_variant	MODIFIER	T08G2.2
492	III	5199982	G	GT	upstream_gene_variant	MODIFIER	emb-8
492	III	10777159	G	GT	3_prime_UTR_variant	MODIFIER	dpy-28
492	III	10909483	GA	G	upstream_gene_variant	MODIFIER	cut-6
492	IV	658518	CA	C	3_prime_UTR_variant	MODIFIER	K11H12.8
492	IV	3018357	AAAATTGCCGATTTGCTGAATTTGCCGGAAATTTTCGGC	A	upstream_gene_variant	MODIFIER	Y54G2A.67
492	IV	3549701	TAA	T	upstream_gene_variant	MODIFIER	nstp-6
492	IV	8288176	CTCCTCCTCTTCGTCT	C	disruptive_inframe_deletion	MODERATE	K07H8.10
492	IV	13283524	G	GA	upstream_gene_variant	MODIFIER	cpsf-3
492	IV	15700670	TA	T	upstream_gene_variant	MODIFIER	21ur-7930
492	I	1201612	GA	G	upstream_gene_variant	MODIFIER	Y48G8AL.5
492	I	1570869	T	TTCGG	upstream_gene_variant	MODIFIER	Y92H12A.t1
492	I	3606344	G	GT	upstream_gene_variant	MODIFIER	mis-12
492	I	5756446	TA	T	downstream_gene_variant	MODIFIER	che-14
492	I	10355192	ATTACTT	A	upstream_gene_variant	MODIFIER	ZC434.9
492	II	2493862	T	TAGGA	intron_variant	MODIFIER	F53G2.1
492	II	3395725	GCGCGGTCGCGT	G	upstream_gene_variant	MODIFIER	nep-19
492	V	2341605	G	GAA	upstream_gene_variant	MODIFIER	irld-29
492	X	343982	TA	T	upstream_gene_variant	MODIFIER	C04E7.4
492	X	683763	ATG	A	upstream_gene_variant	MODIFIER	T19D7.7
492	X	9245449	GCAA	G	upstream_gene_variant	MODIFIER	lgc-4
492	X	10464888	GA	G	upstream_gene_variant	MODIFIER	C39B10.1
495	III	1670321	CA	C	upstream_gene_variant	MODIFIER	Y22D7AR.3
495	III	5272214	CGTCA	C	upstream_gene_variant	MODIFIER	ZC395.12
495	IV	5009298	A	AT	upstream_gene_variant	MODIFIER	21ur-5530
495	I	11409189	GATAT	G	downstream_gene_variant	MODIFIER	Y53H1C.8
495	II	13808707	AT	A	intron_variant	MODIFIER	ZK131.11
495	V	4204914	CGTG	C	downstream_gene_variant	MODIFIER	rpac-40
495	V	13078076	ACACCCTAAG	A	upstream_gene_variant	MODIFIER	C34B4.14
495	X	2038013	TA	T	upstream_gene_variant	MODIFIER	Y102A11A.6
497	IV	2772489	T	TG	upstream_gene_variant	MODIFIER	Y54G2A.11
497	IV	5171468	CTG	C	upstream_gene_variant	MODIFIER	21ur-270
497	IV	5436006	GTTTTTTTTTC	G	upstream_gene_variant	MODIFIER	21ur-7242
497	IV	6577760	ACATGTTGAG	A	upstream_gene_variant	MODIFIER	21ur-7676
497	II	2766599	CT	C	upstream_gene_variant	MODIFIER	F29A7.9
497	II	2924862	C	CT	upstream_gene_variant	MODIFIER	ZK355.8
497	II	3077654	A	AT	upstream_gene_variant	MODIFIER	Y25C1A.8
497	II	6919288	TA	T	upstream_gene_variant	MODIFIER	B0252.5
497	II	13792193	GT	G	upstream_gene_variant	MODIFIER	C01B9.6
497	II	14059919	TCA	T	5_prime_UTR_variant	MODIFIER	rpb-11
497	V	3190092	G	GA	upstream_gene_variant	MODIFIER	Y73C8B.9
497	V	4323013	CA	C	upstream_gene_variant	MODIFIER	ZC132.9
497	V	17607463	A	ACTTTTCCTTTTCTTT	upstream_gene_variant	MODIFIER	Y6G8.12
497	V	19703874	G	GA	upstream_gene_variant	MODIFIER	Y43F8C.18
497	X	2323063	CA	C	upstream_gene_variant	MODIFIER	aakg-4
497	X	3944287	A	AT	upstream_gene_variant	MODIFIER	T19D2.2
497	X	9653994	GTACT	G	upstream_gene_variant	MODIFIER	aex-2
498	IV	3135078	AAG	A	upstream_gene_variant	MODIFIER	mca-3
498	IV	4846825	A	AT	upstream_gene_variant	MODIFIER	21ur-13380
498	IV	4930140	AATGCTG	A	upstream_gene_variant	MODIFIER	Y9C9A.8
498	I	1847394	T	TTCCG	upstream_gene_variant	MODIFIER	tag-96
498	I	9317793	A	AT	frameshift_variant	HIGH	uggt-2
498	I	12115417	ATTTTTAT	A	upstream_gene_variant	MODIFIER	M01G12.9
498	II	9944500	T	TA	downstream_gene_variant	MODIFIER	C05C10.5
498	II	12686963	G	GC	downstream_gene_variant	MODIFIER	cox-10
498	II	12724386	GCACTTTTTTGCCATTTTTGC	G	upstream_gene_variant	MODIFIER	Y46G5A.45
498	V	2220810	CAAAAATTT	C	upstream_gene_variant	MODIFIER	nhr-128
498	V	2220820	T	TGC	upstream_gene_variant	MODIFIER	nhr-128
498	V	7897521	TTA	T	splice_donor_variant&splice_region_variant&intron_variant	HIGH	F40A3.7
498	V	10300626	ATT	A	frameshift_variant	HIGH	che-12
498	V	18420575	GT	G	upstream_gene_variant	MODIFIER	srh-198
498	X	1121357	AT	A	upstream_gene_variant	MODIFIER	C05D9.7
498	X	16254300	CTA	C	upstream_gene_variant	MODIFIER	W10G6.6
500	III	993300	G	GCC	downstream_gene_variant	MODIFIER	tbc-10
500	III	993307	T	TC	downstream_gene_variant	MODIFIER	tbc-10
500	III	1198596	C	CGGTAG	upstream_gene_variant	MODIFIER	Y119D3B.14
500	III	4559607	CT	C	upstream_gene_variant	MODIFIER	pan-1
500	III	11854101	G	GTT	downstream_gene_variant	MODIFIER	mif-1
500	IV	5039767	AT	A	upstream_gene_variant	MODIFIER	21ur-1626
500	IV	8651776	G	GT	upstream_gene_variant	MODIFIER	cyp-33E1
500	IV	10408391	GT	G	downstream_gene_variant	MODIFIER	gpa-7
500	IV	14552195	CT	C	upstream_gene_variant	MODIFIER	T27E7.9
500	I	7725217	TA	T	frameshift_variant	HIGH	F27D4.4
500	I	9990305	A	AGTTTT	frameshift_variant	HIGH	hpo-24
500	I	9990308	GA	G	frameshift_variant	HIGH	hpo-24
500	I	9990312	TCA	T	frameshift_variant	HIGH	hpo-24
500	II	6901842	ATCGATATTTTTGT	A	upstream_gene_variant	MODIFIER	C44B7.11
500	II	7873133	CAAACA	C	frameshift_variant	HIGH	T01H3.3
500	II	8485525	GCTGGACATAAAC	G	upstream_gene_variant	MODIFIER	M05D6.5
500	V	6734316	GT	G	upstream_gene_variant	MODIFIER	grl-9
500	V	7086168	GA	G	frameshift_variant	HIGH	VC5.2
500	V	10169665	GT	G	3_prime_UTR_variant	MODIFIER	egl-3
500	V	10800208	TAATTTTTTTTTTG	T	upstream_gene_variant	MODIFIER	srh-184
500	V	12608686	TA	T	upstream_gene_variant	MODIFIER	ZC116.1
500	X	1332426	ACTT	A	upstream_gene_variant	MODIFIER	F21E9.2
500	X	3983813	GA	G	upstream_gene_variant	MODIFIER	C16B8.5
500	X	5322295	TCAG	T	upstream_gene_variant	MODIFIER	F32A6.t1
500	X	7818242	ATTGAAAAAAATAAAAAATGAATTTTCAAACTAAATCGAATTTATCT	A	intron_variant	MODIFIER	sek-1
405	III	1078292	ATGGGGGAATTT	A	3_prime_UTR_variant	MODIFIER	rab-18
405	III	2520859	T	TAAAACC	intron_variant	MODIFIER	rbc-2
405	III	8256903	T	TG	upstream_gene_variant	MODIFIER	ncr-2
405	III	12367230	T	TTCGAAAAAAACCGTGTA	upstream_gene_variant	MODIFIER	rpt-6
405	III	12398457	GCGCGTCGCGTGT	G	upstream_gene_variant	MODIFIER	wht-9
405	III	13252682	AT	A	upstream_gene_variant	MODIFIER	F56A8.9
405	IV	10522246	TTA	T	upstream_gene_variant	MODIFIER	cal-4
405	I	5094478	A	AT	upstream_gene_variant	MODIFIER	C30F8.5
405	II	176434	ATATAT	A	upstream_gene_variant	MODIFIER	T01D1.7
405	V	3715186	CT	C	downstream_gene_variant	MODIFIER	lin-40
405	V	20697340	TA	T	upstream_gene_variant	MODIFIER	F53F8.t1
405	X	3163271	T	TC	upstream_gene_variant	MODIFIER	C15C7.13
405	X	15662475	CA	C	upstream_gene_variant	MODIFIER	F59D12.8
407	III	749841	T	TGA	upstream_gene_variant	MODIFIER	21ur-13981
407	III	13198194	TA	T	intron_variant	MODIFIER	gly-5
407	IV	400601	TA	T	upstream_gene_variant	MODIFIER	gpa-4
407	IV	1117793	CA	C	upstream_gene_variant	MODIFIER	srx-14
407	IV	4290824	C	CAT	upstream_gene_variant	MODIFIER	srv-4
407	I	3242916	ATT	A	upstream_gene_variant	MODIFIER	Y54E10A.24
407	I	9803954	CT	C	upstream_gene_variant	MODIFIER	F35C12.4
407	I	12570056	G	GT	frameshift_variant	HIGH	dlk-1
407	II	2212742	GT	G	3_prime_UTR_variant	MODIFIER	Y59C2A.1
407	V	12027273	G	GTAGCCATCAGTT	upstream_gene_variant	MODIFIER	pkc-1
407	V	19690454	TAAA	T	downstream_gene_variant	MODIFIER	Y43F8C.13
407	X	5363131	ATTGG	A	upstream_gene_variant	MODIFIER	chtl-1
407	X	5703678	CA	C	upstream_gene_variant	MODIFIER	W01C8.9
407	X	16728913	GA	G	upstream_gene_variant	MODIFIER	hda-4
416	III	1061067	C	CA	upstream_gene_variant	MODIFIER	BE0003N10.3
416	III	2273749	CTAAAATTAGTTAAAA	C	upstream_gene_variant	MODIFIER	fbxa-48
416	III	5835159	GAGCCTA	G	upstream_gene_variant	MODIFIER	mdt-15
416	III	12795641	CA	C	downstream_gene_variant	MODIFIER	lgc-37
416	IV	808011	G	GA	3_prime_UTR_variant	MODIFIER	Y55F3BL.2
416	IV	7796935	A	AT	upstream_gene_variant	MODIFIER	C33H5.13
416	IV	10463673	T	TA	upstream_gene_variant	MODIFIER	mec-3
416	IV	14455648	A	AT	upstream_gene_variant	MODIFIER	mir-2217.4
416	IV	14589503	G	GT	upstream_gene_variant	MODIFIER	21ur-958
416	I	601583	C	CTGTATATATA	intron_variant	MODIFIER	hum-7
416	II	7242184	GATA	G	upstream_gene_variant	MODIFIER	aqp-1
416	V	3750622	ACT	A	frameshift_variant	HIGH	Y39H10A.6
416	V	18636087	ATGGGG	A	frameshift_variant	HIGH	egas-3
418	IV	1786336	GA	G	upstream_gene_variant	MODIFIER	frpr-19
418	IV	2686952	G	GT	downstream_gene_variant	MODIFIER	Y94H6A.5
418	I	458930	G	GC	upstream_gene_variant	MODIFIER	W04C9.4
418	II	5263261	G	GT	downstream_gene_variant	MODIFIER	C54A12.3
418	V	434567	TC	T	upstream_gene_variant	MODIFIER	B0554.2
418	V	474536	A	ACAAC	upstream_gene_variant	MODIFIER	nhr-99
418	X	562155	C	CA	upstream_gene_variant	MODIFIER	hlh-19
418	X	14451186	T	TA	downstream_gene_variant	MODIFIER	F23D12.7
448	IV	3091752	G	GT	upstream_gene_variant	MODIFIER	Y67D8C.9
448	IV	14180002	TA	T	upstream_gene_variant	MODIFIER	R05A10.3
448	I	7682301	G	GA	upstream_gene_variant	MODIFIER	rlbp-1
448	II	2476292	T	TTGGAGGATTCAA	upstream_gene_variant	MODIFIER	tsr-1
448	II	8437884	AG	A	upstream_gene_variant	MODIFIER	acp-4
448	II	12101597	T	TA	upstream_gene_variant	MODIFIER	Y17G7B.17
448	V	9863176	GT	G	upstream_gene_variant	MODIFIER	lsy-12
448	V	16306333	TAACTCA	T	upstream_gene_variant	MODIFIER	C31A11.13
448	X	7898975	GT	G	upstream_gene_variant	MODIFIER	C39D10.6
451	III	1247655	C	CAA	frameshift_variant	HIGH	fbxa-76
451	III	11396891	T	TA	upstream_gene_variant	MODIFIER	nlp-21
451	III	11984994	GC	G	intron_variant	MODIFIER	Y56A3A.31
451	III	13064313	T	TC	intergenic_region	MODIFIER	F54F12.6-Y39E4B.6
451	IV	3762310	AT	A	downstream_gene_variant	MODIFIER	best-20
451	IV	11005162	G	GT	3_prime_UTR_variant	MODIFIER	F13H10.1
451	IV	12333319	G	GT	upstream_gene_variant	MODIFIER	ufd-1
451	IV	13450029	C	CT	upstream_gene_variant	MODIFIER	mam-3
451	I	37398	AT	A	upstream_gene_variant	MODIFIER	sesn-1
451	I	427454	TCC	T	downstream_gene_variant	MODIFIER	C07F11.2
451	I	427457	TG	T	downstream_gene_variant	MODIFIER	C07F11.2
451	I	8790040	G	GA	upstream_gene_variant	MODIFIER	mfb-1
451	I	9511382	CTGA	C	disruptive_inframe_deletion	MODERATE	smn-1
451	II	7137953	G	GT	downstream_gene_variant	MODIFIER	gld-3
451	II	14091899	ATGG	A	downstream_gene_variant	MODIFIER	xrn-1
451	II	14121201	A	AT	upstream_gene_variant	MODIFIER	K09E4.4
451	V	19598803	TCCA	T	upstream_gene_variant	MODIFIER	B0399.t10
451	X	1327898	C	CT	3_prime_UTR_variant	MODIFIER	pdk-1
451	X	13883561	T	TG	upstream_gene_variant	MODIFIER	T21H8.5
459	III	1857391	G	GA	upstream_gene_variant	MODIFIER	Y39A3CR.5
459	IV	16747777	GA	G	upstream_gene_variant	MODIFIER	21ur-15147
459	I	2480605	T	TGAAAATCA	upstream_gene_variant	MODIFIER	Y74C10AR.2
459	I	4728483	G	GA	upstream_gene_variant	MODIFIER	ugt-25
459	I	4728487	T	TTTATTTA	upstream_gene_variant	MODIFIER	ugt-25
459	I	10914532	CT	C	upstream_gene_variant	MODIFIER	F49D11.6
459	II	6697714	CTG	C	upstream_gene_variant	MODIFIER	C18H9.5
459	II	14291265	GAGA	G	upstream_gene_variant	MODIFIER	srh-41
459	II	14940005	A	ATTTTTT	upstream_gene_variant	MODIFIER	pde-3
459	V	825571	TTTCTACAGTACTCTTACAGTACCC	T	upstream_gene_variant	MODIFIER	srx-32
459	V	903107	GA	G	upstream_gene_variant	MODIFIER	nas-32
459	V	8362091	TCTCA	T	upstream_gene_variant	MODIFIER	F38E1.9
459	V	14705632	A	AATT	upstream_gene_variant	MODIFIER	R08A2.9
459	X	315446	C	CA	upstream_gene_variant	MODIFIER	M02E1.2
459	X	7019984	C	CT	upstream_gene_variant	MODIFIER	R173.9
459	X	11841194	A	ATTT	upstream_gene_variant	MODIFIER	taf-7.1
479	III	10581943	TG	T	upstream_gene_variant	MODIFIER	Y45F3A.6
479	III	12237446	GAA	G	upstream_gene_variant	MODIFIER	grl-15
479	IV	3081103	C	CA	upstream_gene_variant	MODIFIER	Y67D8C.22
479	IV	8041315	TTAC	T	upstream_gene_variant	MODIFIER	nhr-258
479	IV	12777712	AT	A	upstream_gene_variant	MODIFIER	ZK897.2
479	IV	14732136	TA	T	upstream_gene_variant	MODIFIER	21ur-5618
479	I	5436533	TTTCCATTTCACA	T	conservative_inframe_deletion	MODERATE	F27C1.11
479	I	6288281	AT	A	upstream_gene_variant	MODIFIER	C10G11.17
479	I	8884151	TA	T	intron_variant	MODIFIER	F55H12.3
479	I	13749472	A	ATT	downstream_gene_variant	MODIFIER	Y6B3B.5
479	II	5150962	A	AAG	upstream_gene_variant	MODIFIER	F58A6.5
479	II	12781869	AATACCTGGTTACTTG	A	downstream_gene_variant	MODIFIER	Y46G5A.34
479	V	464881	ACCTATATTCTTGGCAC	A	splice_region_variant	LOW	nhr-202
479	V	17560799	TC	T	frameshift_variant	HIGH	fbxa-172
479	V	17560806	A	AG	frameshift_variant	HIGH	fbxa-172
479	X	3463154	AT	A	downstream_gene_variant	MODIFIER	ZK377.5
479	X	4921592	A	AAATAAAGAAC	3_prime_UTR_variant	MODIFIER	mct-4
479	X	4921611	AATGACAG	A	3_prime_UTR_variant	MODIFIER	mct-4
487	III	8992823	C	CA	frameshift_variant	HIGH	R08D7.7
487	III	11912709	T	TA	upstream_gene_variant	MODIFIER	npp-16
487	IV	9005582	CA	C	upstream_gene_variant	MODIFIER	C53D6.t1
487	IV	10465452	AG	A	upstream_gene_variant	MODIFIER	mec-3
487	I	10054809	CTTCTTTTTCTGAAAATTTTTAAAT	C	frameshift_variant&splice_acceptor_variant&splice_region_variant&intron_variant	HIGH	F10G8.8
487	I	10057196	AT	A	intron_variant	MODIFIER	F10G8.8
487	II	15154761	CT	C	upstream_gene_variant	MODIFIER	21ur-12457
487	V	13266337	CAA	C	upstream_gene_variant	MODIFIER	zip-5
487	V	13266341	TAA	T	upstream_gene_variant	MODIFIER	zip-5
496	III	2148785	TACCC	T	upstream_gene_variant	MODIFIER	gcn-1
496	III	3467756	C	CA	3_prime_UTR_variant	MODIFIER	C34C12.4
496	III	7774864	A	AT	3_prime_UTR_variant	MODIFIER	bath-15
496	III	7774867	AG	A	3_prime_UTR_variant	MODIFIER	bath-15
496	III	7774875	AAT	A	3_prime_UTR_variant	MODIFIER	bath-15
496	IV	802915	T	TA	upstream_gene_variant	MODIFIER	Y55F3BL.4
496	I	2284128	ATTATTTATT	A	downstream_gene_variant	MODIFIER	Y39G10AL.1
496	II	3844617	CCAAGGAAT	C	frameshift_variant	HIGH	C17A2.3
496	II	8979891	GT	G	downstream_gene_variant	MODIFIER	C18E9.14
496	II	12073424	TAAA	T	downstream_gene_variant	MODIFIER	Y17G7B.22
496	V	1000480	TTC	T	intron_variant	MODIFIER	Y50D4C.5
496	V	4575459	A	AATTCAACAAAAATAAAT	upstream_gene_variant	MODIFIER	hpo-39
496	V	16880604	A	AAC	upstream_gene_variant	MODIFIER	F09C6.3
496	V	19661048	CA	C	downstream_gene_variant	MODIFIER	Y43F8C.t4
496	V	20020250	T	TGGGGTCCTGTAAAGA	upstream_gene_variant	MODIFIER	Y60A3A.t1
496	X	2046368	TG	T	upstream_gene_variant	MODIFIER	igcm-4
496	X	8754596	G	GA	3_prime_UTR_variant	MODIFIER	M02D8.5
496	X	13761568	ATAGAGTAAC	A	disruptive_inframe_deletion	MODERATE	F55F3.2
496	X	16396480	A	ATTAAAG	stop_gained&conservative_inframe_insertion	HIGH	F01G12.1
421	III	593300	G	GT	intron_variant	MODIFIER	Y55B1AR.2
421	III	1397937	AAAAC	A	upstream_gene_variant	MODIFIER	Y82E9BR.4
421	III	3217505	T	TA	intron_variant	MODIFIER	frm-8
421	III	11026218	AT	A	downstream_gene_variant	MODIFIER	kvs-4
421	III	12640889	C	CT	upstream_gene_variant	MODIFIER	Y111B2A.31
421	III	12640896	TTAGGCTTAG	T	upstream_gene_variant	MODIFIER	Y111B2A.31
421	IV	594380	CGTAGGCATGAAGGCAT	C	upstream_gene_variant	MODIFIER	C18H7.6
421	I	2436174	CATCCTGTTTTGGTGA	C	upstream_gene_variant	MODIFIER	F23C8.8
421	I	5940848	GT	G	upstream_gene_variant	MODIFIER	B0207.6
421	II	4110558	GCATTTTTTGCCTTCT	G	upstream_gene_variant	MODIFIER	T08H4.6
421	II	8020886	TCA	T	3_prime_UTR_variant	MODIFIER	hda-2
421	II	11352194	GT	G	upstream_gene_variant	MODIFIER	B0491.6
421	V	27563	CTAGAA	C	upstream_gene_variant	MODIFIER	21ur-15398
421	V	6998941	AT	A	upstream_gene_variant	MODIFIER	nhr-107
421	V	9730992	CA	C	upstream_gene_variant	MODIFIER	aagr-3
421	V	17997899	T	TA	downstream_gene_variant	MODIFIER	Y59A8B.21
421	X	404179	CCATAACTGAGA	C	upstream_gene_variant	MODIFIER	R04A9.1
421	X	5261212	TA	T	upstream_gene_variant	MODIFIER	Y34B4A.18
421	X	13179236	T	TA	upstream_gene_variant	MODIFIER	nlp-3
424	III	1054425	TCA	T	upstream_gene_variant	MODIFIER	BE0003N10.5
424	III	1277951	C	CATAA	upstream_gene_variant	MODIFIER	fbxa-29
424	III	1419254	CCCT	C	disruptive_inframe_deletion	MODERATE	Y82E9BR.3
424	III	9892536	A	ACTTAG	upstream_gene_variant	MODIFIER	alg-4
424	IV	6027336	CAA	C	upstream_gene_variant	MODIFIER	21ur-767
424	I	6870414	G	GTA	upstream_gene_variant	MODIFIER	T21G5.2
424	II	13613347	A	ACCTGGAAAAGCCTTTG	upstream_gene_variant	MODIFIER	gst-20
424	V	509188	T	TA	downstream_gene_variant	MODIFIER	pqn-60
424	V	2827720	TA	T	upstream_gene_variant	MODIFIER	T03D3.5
424	V	4546890	TTG	T	intron_variant	MODIFIER	sos-1
424	V	13678646	A	AAT	upstream_gene_variant	MODIFIER	tag-65
424	V	16201696	C	CA	upstream_gene_variant	MODIFIER	F11A5.17
424	X	11830532	C	CTTTG	upstream_gene_variant	MODIFIER	tag-241
424	X	16923270	A	AG	upstream_gene_variant	MODIFIER	C30E1.8
442	IV	16634609	TC	T	upstream_gene_variant	MODIFIER	21ur-13442
442	I	2651039	A	AGTCGTTCTCTCGT	downstream_gene_variant	MODIFIER	F40E3.9
442	II	12336926	TGA	T	upstream_gene_variant	MODIFIER	sop-2
442	V	110020	T	TAAAA	downstream_gene_variant	MODIFIER	F56E10.1
442	V	110022	A	AT	downstream_gene_variant	MODIFIER	F56E10.1
442	V	977339	A	AC	upstream_gene_variant	MODIFIER	Y50D4C.10
442	V	12561495	GA	G	upstream_gene_variant	MODIFIER	F45D3.12
442	X	8319484	C	CA	upstream_gene_variant	MODIFIER	srh-12
445	IV	933360	G	GA	intron_variant	MODIFIER	lgc-30
445	IV	6463800	CT	C	upstream_gene_variant	MODIFIER	21ur-8080
445	IV	16384147	T	TA	upstream_gene_variant	MODIFIER	Y7A9D.1
445	I	11238	T	TA	upstream_gene_variant	MODIFIER	homt-1
445	I	5940604	AT	A	upstream_gene_variant	MODIFIER	B0207.6
445	I	11405591	CT	C	upstream_gene_variant	MODIFIER	Y53H1C.8
445	I	11421073	T	TTTTC	upstream_gene_variant	MODIFIER	ego-2
445	I	12771420	GA	G	upstream_gene_variant	MODIFIER	B0019.2
445	II	1531002	T	TAAA	upstream_gene_variant	MODIFIER	Y51H7BR.4
445	II	3813522	GA	G	upstream_gene_variant	MODIFIER	fbxa-24
445	II	4106848	A	AT	upstream_gene_variant	MODIFIER	T08H4.6
445	V	5338948	AG	A	frameshift_variant	HIGH	srg-29
445	X	1301742	A	AT	downstream_gene_variant	MODIFIER	dop-4
445	X	8718838	CAT	C	frameshift_variant	HIGH	F53A9.8
445	X	8718841	GAT	G	frameshift_variant	HIGH	F53A9.8
463	III	5850806	ATATATAC	A	downstream_gene_variant	MODIFIER	cct-6
463	IV	13801122	GT	G	upstream_gene_variant	MODIFIER	Y45F10D.6
463	I	7056562	T	TA	upstream_gene_variant	MODIFIER	W01A8.7
463	II	1789355	T	TCCCCTTCG	frameshift_variant	HIGH	fbxb-13
463	II	5361684	A	AT	upstream_gene_variant	MODIFIER	F09E5.11
463	II	6597793	GA	G	upstream_gene_variant	MODIFIER	C56C10.10
463	II	6977038	TA	T	frameshift_variant	HIGH	C15F1.8
463	II	9033580	AAATT	A	upstream_gene_variant	MODIFIER	F37B12.1
463	II	14103946	T	TGCTTTGGAAATCATGAAAA	upstream_gene_variant	MODIFIER	gur-4
463	V	4011089	GT	G	upstream_gene_variant	MODIFIER	str-42
463	V	4129792	CA	C	upstream_gene_variant	MODIFIER	T05B4.12
463	V	11088231	C	CTTTT	upstream_gene_variant	MODIFIER	T04C12.22
463	V	12300090	GT	G	upstream_gene_variant	MODIFIER	F55C5.12
463	V	16263783	CAAG	C	conservative_inframe_deletion	MODERATE	nhr-127
463	V	20016908	TTAGAA	T	upstream_gene_variant	MODIFIER	Y60A3A.t1
463	X	2905992	AT	A	upstream_gene_variant	MODIFIER	F52B10.9
463	X	3933854	GT	G	upstream_gene_variant	MODIFIER	T19D2.9
463	X	15305915	CTA	C	upstream_gene_variant	MODIFIER	C02D4.7
469	III	2561307	A	AT	upstream_gene_variant	MODIFIER	Y54F10AM.14
469	III	5666175	ATC	A	upstream_gene_variant	MODIFIER	21ur-9905
469	IV	2678376	GA	G	3_prime_UTR_variant	MODIFIER	Y94H6A.3
469	IV	3997382	CA	C	upstream_gene_variant	MODIFIER	F47C12.11
469	IV	8652379	GA	G	upstream_gene_variant	MODIFIER	cyp-33E1
469	II	8260487	GT	G	upstream_gene_variant	MODIFIER	F35C11.12
469	V	15013770	TA	T	upstream_gene_variant	MODIFIER	nmr-2
469	V	16694153	TA	T	upstream_gene_variant	MODIFIER	srw-42
469	X	5844224	TGC	T	frameshift_variant	HIGH	puf-9
469	X	11395399	A	AT	downstream_gene_variant	MODIFIER	prmn-1
469	X	15562067	A	AT	upstream_gene_variant	MODIFIER	C02C6.9
472	III	6188648	TAAA	T	upstream_gene_variant	MODIFIER	C23G10.12
472	III	6188652	TAAATAAATAATGCATTTTCCAA	T	upstream_gene_variant	MODIFIER	C23G10.12
472	III	10908621	A	AT	upstream_gene_variant	MODIFIER	cut-6
472	IV	4371047	G	GT	upstream_gene_variant	MODIFIER	F55F10.1
472	I	858324	AT	A	intron_variant	MODIFIER	Y95B8A.8
472	I	1457455	T	TA	upstream_gene_variant	MODIFIER	gst-25
472	I	12684978	A	ATCACAATAATCTTTAT	upstream_gene_variant	MODIFIER	T26E3.10
472	I	13892192	CA	C	upstream_gene_variant	MODIFIER	Y71A12B.2
472	I	15018242	G	GA	upstream_gene_variant	MODIFIER	F33H2.5
472	II	8116797	T	TA	upstream_gene_variant	MODIFIER	lron-4
472	V	1696794	CAA	C	upstream_gene_variant	MODIFIER	Y46H3C.7
472	V	9055452	CT	C	3_prime_UTR_variant	MODIFIER	C25E10.10
472	V	10123568	GATTTTTCACGTAAACTTATA	G	upstream_gene_variant	MODIFIER	C08B6.16
472	V	14502423	TC	T	upstream_gene_variant	MODIFIER	R02D5.18
472	V	16487382	CAA	C	frameshift_variant	HIGH	Y32B12A.5
472	V	16487388	TCTTGAGAAATTGAG	T	frameshift_variant	HIGH	Y32B12A.5
472	V	18005173	AT	A	upstream_gene_variant	MODIFIER	lon-8
472	X	2353731	C	CA	upstream_gene_variant	MODIFIER	T24D8.17

## Sheet: Readme
The preceding worksheets show the complete list of mutations and their genomic context in nuclear loci. mev_BS: the list of base substitutions and their genomic context in mev-1 MA lines. mev_indels: the list of indels and their genomic context in mev-1 MA lines. N2_BS: the list of base sumstitutions and their genomic context in N2 MA lines. N2_indels: the list of indels and their genomic context…
Column heading	Explanation
Line	name of lines
CHROM	name of chromosomes
POS	position of the varinats
REF	reference allele
ALT	alternative allele
type	annotation of the variants using Sequence Ontology terms
putative effect	an estimation of putative effect of the variants
Gene annotation	common gene name
