# Supplementary material for: Mutability of mononucleotide repeats, not oxidative stress, explains the discrepancy between laboratory-accumulated mutations and the natural allele-frequency spectrum in C. elegans
Source: HighWire-hosted journal article supplement (doi:10.1101/gr.275372.121), 2021-08-17
Supplement: Supplemental_Table_S5.xlsx.xlsx [file Supplemental_Table_S5.xlsx.xlsx]

## Sheet: Sheet1
Strains	lines	CHROM	POS	REF	ALT	fr	type	putative effect	Gene annotation
PB306	402	MtDNA	4967	C	T	0.332164	missense_variant	MODERATE	ctb-1
PB306	405	MtDNA	12510	C	A	0.228365	missense_variant	MODERATE	nduo-5
PB306	406	MtDNA	5534	G	T	0.421687	missense_variant	MODERATE	ctb-1
PB306	407	MtDNA	4820	TA	T	0.824468	frameshift_variant	HIGH	ctb-1
PB306	407	MtDNA	10536	G	A	0.832861	upstream_gene_variant	MODIFIER	nduo-3
PB306	407	MtDNA	11126	A	G	0.820961	upstream_gene_variant	MODIFIER	nduo-3
PB306	414	MtDNA	9020	T	A	0.895504	synonymous_variant	LOW	ctc-1
PB306	415	MtDNA	12026	G	GT	0.220812	frameshift_variant	HIGH	nduo-5
PB306	416	MtDNA	1935	TA	T	0.372197	frameshift_variant	HIGH	nduo-1
PB306	416	MtDNA	13240	T	C	0.979339	missense_variant	MODERATE	nduo-5
PB306	420	MtDNA	3717	G	T	0.238806	synonymous_variant	LOW	nduo-2
PB306	428	MtDNA	4555	T	A	1	missense_variant	MODERATE	ctb-1
PB306	429	MtDNA	935	T	C	0.374422	upstream_gene_variant	MODIFIER	MTCE.8
PB306	440	MtDNA	189	G	GT	0.351119	frameshift_variant	HIGH	nduo-6
PB306	443	MtDNA	1884	A	G	0.372197	missense_variant	MODERATE	nduo-1
PB306	449	MtDNA	1376	T	C	0.171761	upstream_gene_variant	MODIFIER	MTCE.8
PB306	451	MtDNA	11946	G	T	0.993789	missense_variant	MODERATE	nduo-5
PB306	456	MtDNA	4046	C	T	0.164978	missense_variant	MODERATE	nduo-2
PB306	462	MtDNA	6655	G	A	0.938799	synonymous_variant	LOW	nduo-4
PB306	468	MtDNA	2316	C	A	0.238612	missense_variant	MODERATE	nduo-1
PB306	468	MtDNA	2884	C	T	0.60404	missense_variant	MODERATE	atp-6
PB306	469	MtDNA	1375	A	G	0.0982906	upstream_gene_variant	MODIFIER	MTCE.8
PB306	469	MtDNA	8674	C	T	0.987111	missense_variant	MODERATE	ctc-1
PB306	471	MtDNA	11326	G	T	0.999642	upstream_gene_variant	MODIFIER	nduo-3
PB306	472	MtDNA	9687	G	T	0.973684	missense_variant	MODERATE	ctc-2
PB306	476	MtDNA	12743	A	AT	0.155941	frameshift_variant	HIGH	nduo-5
PB306	479	MtDNA	1027	G	T	0.988124	upstream_gene_variant	MODIFIER	MTCE.8
PB306	482	MtDNA	11202	G	T	1	upstream_gene_variant	MODIFIER	nduo-3
PB306	487	MtDNA	680	G	GT	0.227273	frameshift_variant	HIGH	ndfl-4
PB306	489	MtDNA	9283	T	C	1	missense_variant	MODERATE	ctc-1
PB306	489	MtDNA	11555	A	G	1	missense_variant	MODERATE	nduo-3
PB306	490	MtDNA	11386	A	G	0.333333	missense_variant	MODERATE	nduo-3
PB306	490	MtDNA	11392	G	A	0.333333	missense_variant	MODERATE	nduo-3
PB306	490	MtDNA	11400	A	T	0.25	missense_variant	MODERATE	nduo-3
PB306	497	MtDNA	863	A	G	0.758242	missense_variant	MODERATE	MTCE.6
N2	504	MtDNA	6518	C	T	0.473984	missense_variant	MODERATE	nduo-4
N2	508	MtDNA	205	T	C	0.274752	synonymous_variant	LOW	nduo-6
N2	511	MtDNA	6054	C	T	0.99093	missense_variant	MODERATE	ctc-3
N2	513	MtDNA	3210	A	AT	0.47028	frameshift_variant	HIGH	atp-6
N2	523	MtDNA	13680	T	A	0.266667	downstream_gene_variant	MODIFIER	ctc-1
N2	524	MtDNA	6698	G	GA	0.260274	frameshift_variant	HIGH	nduo-4
N2	525	MtDNA	1651	G	T	0.495077	stop_gained	HIGH	MTCE.9
N2	525	MtDNA	8898	A	AT	0.115476	frameshift_variant	HIGH	ctc-1
N2	532	MtDNA	12507	G	A	0.592946	missense_variant	MODERATE	nduo-5
N2	541	MtDNA	8002	GT	G	0.146199	frameshift_variant	HIGH	ctc-1
N2	545	MtDNA	1527	T	C	0.179138	upstream_gene_variant	MODIFIER	MTCE.8
N2	548	MtDNA	6752	A	AT	0.14	frameshift_variant	HIGH	nduo-4
N2	555	MtDNA	4991	G	A	0.359809	missense_variant	MODERATE	ctb-1
N2	558	MtDNA	1318	G	A	0.0720339	upstream_gene_variant	MODIFIER	MTCE.8
N2	558	MtDNA	11432	G	T	0.993122	missense_variant	MODERATE	nduo-3
N2	563	MtDNA	2899	C	T	0.188119	missense_variant	MODERATE	atp-6
N2	566	MtDNA	885	GT	G	0.414317	frameshift_variant	HIGH	MTCE.6
N2	566	MtDNA	2396	G	T	0.375561	missense_variant	MODERATE	nduo-1
N2	566	MtDNA	4820	T	TA	0.588235	frameshift_variant	HIGH	ctb-1
N2	567	MtDNA	818	C	T	0.32047	stop_gained	HIGH	MTCE.5
N2	567	MtDNA	4045	C	T	0.210821	missense_variant	MODERATE	nduo-2
N2	569	MtDNA	8911	C	T	0.989183	missense_variant	MODERATE	ctc-1
N2	579	MtDNA	9812	G	GA	0.326797	frameshift_variant	HIGH	ctc-2
N2	584	MtDNA	12626	T	C	0.997046	synonymous_variant	LOW	nduo-5
N2	590	MtDNA	6842	T	A	0.99026	missense_variant	MODERATE	nduo-4
N2	590	MtDNA	11887	C	T	0.243402	missense_variant	MODERATE	nduo-5
N2	593	MtDNA	11703	A	AT	0.14026	frameshift_variant	HIGH	nduo-5
N2	594	MtDNA	6031	C	T	0.215577	synonymous_variant	LOW	ctc-3
N2	597	MtDNA	11850	C	CT	0.646562	frameshift_variant	HIGH	nduo-5
N2	597	MtDNA	12751	C	T	0.590643	missense_variant	MODERATE	nduo-5
mev-1	704	MtDNA	8085	A	G	0.389968	missense_variant	MODERATE	ctc-1
mev-1	711	MtDNA	6737	G	T	0.173591	missense_variant	MODERATE	nduo-4
mev-1	712	MtDNA	680	G	GT	0.832111	frameshift_variant	HIGH	ndfl-4
mev-1	744	MtDNA	5284	C	T	0.437841	missense_variant	MODERATE	ctb-1
mev-1	770	MtDNA	11717	A	AT	0.305344	frameshift_variant	HIGH	nduo-5

## Sheet: Readme
The preceding worksheet shows the complete list of mutations and their genomic context in mtDNA loci.
Column heading	Explanation
Strains	name of strain
Line	name of lines
CHROM	name of chromosomes
POS	position of the varinats
REF	reference allele
ALT	alternative allele
fr	the heteroplasmic frequencies of the mtDNA mutations
type	annotation of the variants using Sequence Ontology terms
putative effect	an estimation of putative effect of the variants
Gene annotation	common gene name
