# Supplementary material for: Mutability of mononucleotide repeats, not oxidative stress, explains the discrepancy between laboratory-accumulated mutations and the natural allele-frequency spectrum in C. elegans
Source: HighWire-hosted journal article supplement (doi:10.1101/gr.275372.121), 2021-08-17
Supplement: Supplemental_Table_S9.xlsx [file Supplemental_Table_S9.xlsx]

## Sheet: private alleles (n=1)
Strain	G/C:A/T	A/T:G/C	G/C:C/G	G/C:T/A	A/T:C/G	A/T:T/A	Total	G:C→A:T (%)	A:T→G:C (%)	G:C→C:G (%)	G:C→T:A (%)	A:T→C:G (%)	A:T→T:A (%)
ECA571	0	0	0	0	0	1	1	0	0	0	0	0	1
ECA773	0	0	0	0	1	0	1	0	0	0	0	1	0
ECA811	0	0	0	0	1	0	1	0	0	0	0	1	0
MY2014	1	0	0	0	0	0	1	1	0	0	0	0	0
MY2050	0	0	1	0	0	0	1	0	0	1	0	0	0
MY2535	0	0	0	0	0	1	1	0	0	0	0	0	1
QG2852	0	0	0	0	0	1	1	0	0	0	0	0	1
WN2065	1	0	0	0	0	0	1	1	0	0	0	0	0
ECA1073	0	2	0	0	0	0	2	0	1	0	0	0	0
ECA771	1	0	1	0	0	0	2	0.5	0	0.5	0	0	0
ECA813	0	2	0	0	0	0	2	0	1	0	0	0	0
JU2257	1	0	0	0	1	0	2	0.5	0	0	0	0.5	0
MY2144	1	1	0	0	0	0	2	0.5	0.5	0	0	0	0
MY881	2	0	0	0	0	0	2	1	0	0	0	0	0
QG2853	0	0	0	0	2	0	2	0	0	0	0	1	0
QX1212	1	1	0	0	0	0	2	0.5	0.5	0	0	0	0
ECA739	0	2	0	1	0	0	3	0	0.666667	0	0.333333	0	0
ECA770	0	1	0	0	0	2	3	0	0.333333	0	0	0	0.666667
ECA775	0	0	0	0	2	1	3	0	0	0	0	0.666667	0.333333
JU1530	0	1	0	0	1	1	3	0	0.333333	0	0	0.333333	0.333333
JU311	0	2	1	0	0	0	3	0	0.666667	0.333333	0	0	0
MY2004	1	0	0	0	2	0	3	0.333333	0	0	0	0.666667	0
MY2138	1	2	0	0	0	0	3	0.333333	0.666667	0	0	0	0
MY2142	0	0	1	0	0	2	3	0	0	0.333333	0	0	0.666667
MY2198	0	2	0	0	0	1	3	0	0.666667	0	0	0	0.333333
MY2282	0	1	1	1	0	0	3	0	0.333333	0.333333	0.333333	0	0
MY559	1	1	0	1	0	0	3	0.333333	0.333333	0	0.333333	0	0
QG2829	1	1	0	0	1	0	3	0.333333	0.333333	0	0	0.333333	0
QG2835	1	0	0	1	0	1	3	0.333333	0	0	0.333333	0	0.333333
QG2878	1	0	0	0	1	1	3	0.333333	0	0	0	0.333333	0.333333
WN2033	0	1	0	2	0	0	3	0	0.333333	0	0.666667	0	0
WN2039	2	1	0	0	0	0	3	0.666667	0.333333	0	0	0	0
ECA1071	1	1	0	1	1	0	4	0.25	0.25	0	0.25	0.25	0
ECA763	1	0	0	2	1	0	4	0.25	0	0	0.5	0.25	0
ECA810	0	2	0	0	1	1	4	0	0.5	0	0	0.25	0.25
MY2530	1	1	0	1	0	1	4	0.25	0.25	0	0.25	0	0.25
MY710	1	1	1	0	1	0	4	0.25	0.25	0.25	0	0.25	0
MY804	3	0	0	0	0	1	4	0.75	0	0	0	0	0.25
MY990	0	2	1	0	0	1	4	0	0.5	0.25	0	0	0.25
QG2833	1	1	0	0	1	1	4	0.25	0.25	0	0	0.25	0.25
QG2872	2	0	0	0	2	0	4	0.5	0	0	0	0.5	0
QG2927	1	0	1	1	1	0	4	0.25	0	0.25	0.25	0.25	0
WN2035	2	1	0	0	0	1	4	0.5	0.25	0	0	0	0.25
ECA1391	0	0	2	1	0	2	5	0	0	0.4	0.2	0	0.4
ECA717	1	0	0	2	0	2	5	0.2	0	0	0.4	0	0.4
JU1395	2	1	0	0	0	2	5	0.4	0.2	0	0	0	0.4
MY2001	0	0	4	0	1	0	5	0	0	0.8	0	0.2	0
MY2338	3	1	1	0	0	0	5	0.6	0.2	0.2	0	0	0
MY2573	1	3	0	0	0	1	5	0.2	0.6	0	0	0	0.2
MY2623	0	1	0	2	1	1	5	0	0.2	0	0.4	0.2	0.2
QG2827	2	1	0	0	1	1	5	0.4	0.2	0	0	0.2	0.2
QG2834	2	1	1	0	1	0	5	0.4	0.2	0.2	0	0.2	0
QG2842	0	2	0	2	1	0	5	0	0.4	0	0.4	0.2	0
QG2932	0	1	0	2	0	2	5	0	0.2	0	0.4	0	0.4
WN2013	2	0	0	0	1	2	5	0.4	0	0	0	0.2	0.4
WN2062	2	0	0	1	0	2	5	0.4	0	0	0.2	0	0.4
ECA245	2	1	0	1	1	1	6	0.333333	0.166667	0	0.166667	0.166667	0.166667
ECA615	3	1	0	1	0	1	6	0.5	0.166667	0	0.166667	0	0.166667
ECA718	4	1	0	1	0	0	6	0.666667	0.166667	0	0.166667	0	0
ECA809	1	3	0	0	0	2	6	0.166667	0.5	0	0	0	0.333333
JU2151	2	1	0	1	0	2	6	0.333333	0.166667	0	0.166667	0	0.333333
JU2287	0	2	0	3	0	1	6	0	0.333333	0	0.5	0	0.166667
JU2464	3	1	0	0	1	1	6	0.5	0.166667	0	0	0.166667	0.166667
JU2828	1	2	0	0	1	2	6	0.166667	0.333333	0	0	0.166667	0.333333
JU315	3	1	0	0	0	2	6	0.5	0.166667	0	0	0	0.333333
MY2011	1	1	1	2	1	0	6	0.166667	0.166667	0.166667	0.333333	0.166667	0
MY2147	1	1	1	1	0	2	6	0.166667	0.166667	0.166667	0.166667	0	0.333333
MY589	2	1	0	1	2	0	6	0.333333	0.166667	0	0.166667	0.333333	0
QG2832	0	2	1	1	0	2	6	0	0.333333	0.166667	0.166667	0	0.333333
QG2851	1	0	2	0	1	2	6	0.166667	0	0.333333	0	0.166667	0.333333
QG2877	2	2	1	0	1	0	6	0.333333	0.333333	0.166667	0	0.166667	0
QG2928	2	0	0	0	1	3	6	0.333333	0	0	0	0.166667	0.5
QG537	1	2	1	0	1	1	6	0.166667	0.333333	0.166667	0	0.166667	0.166667
WN2066	3	3	0	0	0	0	6	0.5	0.5	0	0	0	0
ECA1074	0	1	0	3	2	1	7	0	0.142857	0	0.428571	0.285714	0.142857
ECA1257	5	1	0	0	0	1	7	0.714286	0.142857	0	0	0	0.142857
ECA572	3	0	1	1	1	1	7	0.428571	0	0.142857	0.142857	0.142857	0.142857
ECA711	2	0	0	1	2	2	7	0.285714	0	0	0.142857	0.285714	0.285714
ECA787	2	3	0	0	0	2	7	0.285714	0.428571	0	0	0	0.285714
JU2829	5	0	0	0	0	2	7	0.714286	0	0	0	0	0.285714
MY2239	2	1	0	2	0	2	7	0.285714	0.142857	0	0.285714	0	0.285714
MY2373	3	0	0	2	1	1	7	0.428571	0	0	0.285714	0.142857	0.142857
MY2434	4	0	2	0	1	0	7	0.571429	0	0.285714	0	0.142857	0
MY2453	2	1	0	1	1	2	7	0.285714	0.142857	0	0.142857	0.142857	0.285714
MY561	4	1	0	1	0	1	7	0.571429	0.142857	0	0.142857	0	0.142857
MY570	2	2	0	1	1	1	7	0.285714	0.285714	0	0.142857	0.142857	0.142857
NIC273	2	0	1	1	1	2	7	0.285714	0	0.142857	0.142857	0.142857	0.285714
QG2830	1	1	2	0	2	1	7	0.142857	0.142857	0.285714	0	0.285714	0.142857
QG2841	2	0	1	1	0	3	7	0.285714	0	0.142857	0.142857	0	0.428571
QG2873	2	0	0	0	2	3	7	0.285714	0	0	0	0.285714	0.428571
QG2875	1	2	0	0	2	2	7	0.142857	0.285714	0	0	0.285714	0.285714
TWN2542	3	1	0	2	0	1	7	0.428571	0.142857	0	0.285714	0	0.142857
WN2011	3	4	0	0	0	0	7	0.428571	0.571429	0	0	0	0
WN2017	2	1	1	1	1	1	7	0.285714	0.142857	0.142857	0.142857	0.142857	0.142857
WN2050	5	1	0	0	1	0	7	0.714286	0.142857	0	0	0.142857	0
WN2056	1	4	0	1	0	1	7	0.142857	0.571429	0	0.142857	0	0.142857
WN2073	0	3	1	1	1	1	7	0	0.428571	0.142857	0.142857	0.142857	0.142857
ECA1070	3	0	1	2	1	1	8	0.375	0	0.125	0.25	0.125	0.125
ECA1244	3	2	0	2	0	1	8	0.375	0.25	0	0.25	0	0.125
ECA1291	2	2	0	0	1	3	8	0.25	0.25	0	0	0.125	0.375
ECA250	1	1	2	0	2	2	8	0.125	0.125	0.25	0	0.25	0.25
ECA350	1	2	0	3	1	1	8	0.125	0.25	0	0.375	0.125	0.125
ECA589	5	0	0	1	0	2	8	0.625	0	0	0.125	0	0.25
ECA712	1	1	0	1	2	3	8	0.125	0.125	0	0.125	0.25	0.375
ECA749	4	2	0	1	1	0	8	0.5	0.25	0	0.125	0.125	0
ECA752	1	1	0	2	1	3	8	0.125	0.125	0	0.25	0.125	0.375
ECA753	0	3	1	2	2	0	8	0	0.375	0.125	0.25	0.25	0
ECA761	2	2	2	0	1	1	8	0.25	0.25	0.25	0	0.125	0.125
ECA765	2	3	0	2	0	1	8	0.25	0.375	0	0.25	0	0.125
ECA780	1	2	0	1	3	1	8	0.125	0.25	0	0.125	0.375	0.125
JU2830	2	3	0	2	1	0	8	0.25	0.375	0	0.25	0.125	0
JU345	3	0	2	2	0	1	8	0.375	0	0.25	0.25	0	0.125
JU360	5	0	0	1	2	0	8	0.625	0	0	0.125	0.25	0
MY2294	3	1	1	0	0	3	8	0.375	0.125	0.125	0	0	0.375
MY2347	3	1	1	1	0	2	8	0.375	0.125	0.125	0.125	0	0.25
MY2479	4	2	0	1	0	1	8	0.5	0.25	0	0.125	0	0.125
MY2691	1	4	0	1	2	0	8	0.125	0.5	0	0.125	0.25	0
MY920	2	0	1	3	1	1	8	0.25	0	0.125	0.375	0.125	0.125
MY965	5	0	0	1	1	1	8	0.625	0	0	0.125	0.125	0.125
QG2840	1	2	0	0	2	3	8	0.125	0.25	0	0	0.25	0.375
WN2019	2	5	0	0	0	1	8	0.25	0.625	0	0	0	0.125
ECA748	5	1	0	1	1	1	9	0.555556	0.111111	0	0.111111	0.111111	0.111111
ECA750	1	1	0	3	1	3	9	0.111111	0.111111	0	0.333333	0.111111	0.333333
ECA767	3	1	0	0	1	4	9	0.333333	0.111111	0	0	0.111111	0.444444
ECA776	2	0	0	3	0	4	9	0.222222	0	0	0.333333	0	0.444444
ECA812	3	2	0	0	3	1	9	0.333333	0.222222	0	0	0.333333	0.111111
JU346	2	5	1	0	0	1	9	0.222222	0.555556	0.111111	0	0	0.111111
MY2208	5	2	0	0	1	1	9	0.555556	0.222222	0	0	0.111111	0.111111
MY2224	4	1	1	0	0	3	9	0.444444	0.111111	0.111111	0	0	0.333333
MY2344	0	3	1	1	1	3	9	0	0.333333	0.111111	0.111111	0.111111	0.333333
MY673	2	4	0	0	1	2	9	0.222222	0.444444	0	0	0.111111	0.222222
MY934	5	0	2	1	1	0	9	0.555556	0	0.222222	0.111111	0.111111	0
NIC1793	6	1	0	1	0	1	9	0.666667	0.111111	0	0.111111	0	0.111111
QG2931	1	1	0	3	1	3	9	0.111111	0.111111	0	0.333333	0.111111	0.333333
QG536	1	2	0	1	4	1	9	0.111111	0.222222	0	0.111111	0.444444	0.111111
WN2020	4	3	0	0	1	1	9	0.444444	0.333333	0	0	0.111111	0.111111
ECA1072	5	0	2	1	0	2	10	0.5	0	0.2	0.1	0	0.2
ECA1220	4	2	0	1	2	1	10	0.4	0.2	0	0.1	0.2	0.1
ECA1245	3	0	1	2	3	1	10	0.3	0	0.1	0.2	0.3	0.1
ECA249	2	2	1	4	1	0	10	0.2	0.2	0.1	0.4	0.1	0
ECA784	7	0	1	1	1	0	10	0.7	0	0.1	0.1	0.1	0
ECA924	1	1	1	3	1	3	10	0.1	0.1	0.1	0.3	0.1	0.3
ED3073	3	2	1	2	0	2	10	0.3	0.2	0.1	0.2	0	0.2
JU2467	4	1	2	0	0	3	10	0.4	0.1	0.2	0	0	0.3
MY2024	5	2	0	3	0	0	10	0.5	0.2	0	0.3	0	0
MY2121	2	3	2	0	2	1	10	0.2	0.3	0.2	0	0.2	0.1
MY2143	1	3	1	2	1	2	10	0.1	0.3	0.1	0.2	0.1	0.2
MY2636	2	4	0	2	0	2	10	0.2	0.4	0	0.2	0	0.2
MY2679	3	3	0	3	0	1	10	0.3	0.3	0	0.3	0	0.1
MY991	3	0	0	2	2	3	10	0.3	0	0	0.2	0.2	0.3
NIC272	3	1	0	0	0	6	10	0.3	0.1	0	0	0	0.6
QG2812	1	4	1	1	0	3	10	0.1	0.4	0.1	0.1	0	0.3
QG2839	0	5	1	2	1	1	10	0	0.5	0.1	0.2	0.1	0.1
QX1213	2	3	0	1	1	3	10	0.2	0.3	0	0.1	0.1	0.3
WN2068	0	1	2	2	2	3	10	0	0.1	0.2	0.2	0.2	0.3
ECA707	2	3	0	2	1	3	11	0.181818	0.272727	0	0.181818	0.0909091	0.272727
ECA764	3	2	0	0	2	4	11	0.272727	0.181818	0	0	0.181818	0.363636
ECA923	5	1	0	1	1	3	11	0.454545	0.0909091	0	0.0909091	0.0909091	0.272727
ECA927	2	1	3	2	2	1	11	0.181818	0.0909091	0.272727	0.181818	0.181818	0.0909091
JU3401	1	6	1	0	1	2	11	0.0909091	0.545455	0.0909091	0	0.0909091	0.181818
JU363	2	2	2	2	0	3	11	0.181818	0.181818	0.181818	0.181818	0	0.272727
MY2022	5	2	0	1	1	2	11	0.454545	0.181818	0	0.0909091	0.0909091	0.181818
MY2097	1	2	2	4	0	2	11	0.0909091	0.181818	0.181818	0.363636	0	0.181818
MY2288	4	1	1	2	1	2	11	0.363636	0.0909091	0.0909091	0.181818	0.0909091	0.181818
MY2491	3	1	0	0	0	7	11	0.272727	0.0909091	0	0	0	0.636364
MY2579	3	1	0	2	1	4	11	0.272727	0.0909091	0	0.181818	0.0909091	0.363636
MY2640	3	2	0	3	1	2	11	0.272727	0.181818	0	0.272727	0.0909091	0.181818
MY2713	6	3	1	1	0	0	11	0.545455	0.272727	0.0909091	0.0909091	0	0
MY819	4	4	0	2	1	0	11	0.363636	0.363636	0	0.181818	0.0909091	0
MY864	6	1	0	2	0	2	11	0.545455	0.0909091	0	0.181818	0	0.181818
N2	2	3	0	1	1	4	11	0.181818	0.272727	0	0.0909091	0.0909091	0.363636
QG2810	3	3	0	1	2	2	11	0.272727	0.272727	0	0.0909091	0.181818	0.181818
QG2811	2	0	2	1	3	3	11	0.181818	0	0.181818	0.0909091	0.272727	0.272727
TWN2803	5	3	0	0	3	0	11	0.454545	0.272727	0	0	0.272727	0
WN2071	3	3	1	1	2	1	11	0.272727	0.272727	0.0909091	0.0909091	0.181818	0.0909091
ECA616	4	2	1	4	1	0	12	0.333333	0.166667	0.0833333	0.333333	0.0833333	0
ECA716	2	3	0	5	1	1	12	0.166667	0.25	0	0.416667	0.0833333	0.0833333
ECA758	2	2	1	2	1	4	12	0.166667	0.166667	0.0833333	0.166667	0.0833333	0.333333
ECA778	2	7	0	0	0	3	12	0.166667	0.583333	0	0	0	0.25
JU1926	2	6	0	1	1	2	12	0.166667	0.5	0	0.0833333	0.0833333	0.166667
JU3398	3	0	0	3	2	4	12	0.25	0	0	0.25	0.166667	0.333333
MY2339	6	2	3	0	0	1	12	0.5	0.166667	0.25	0	0	0.0833333
MY2585	6	0	2	1	0	3	12	0.5	0	0.166667	0.0833333	0	0.25
MY579	5	3	0	0	3	1	12	0.416667	0.25	0	0	0.25	0.0833333
MY713	5	0	2	5	0	0	12	0.416667	0	0.166667	0.416667	0	0
MY792	4	5	2	0	0	1	12	0.333333	0.416667	0.166667	0	0	0.0833333
QG2813	4	4	0	0	1	3	12	0.333333	0.333333	0	0	0.0833333	0.25
WN2060	3	1	2	2	1	3	12	0.25	0.0833333	0.166667	0.166667	0.0833333	0.25
ECA1389	6	1	3	1	0	2	13	0.461538	0.0769231	0.230769	0.0769231	0	0.153846
ECA349	4	2	0	3	0	4	13	0.307692	0.153846	0	0.230769	0	0.307692
ECA766	0	5	0	3	3	2	13	0	0.384615	0	0.230769	0.230769	0.153846
ECA781	4	1	2	0	3	3	13	0.307692	0.0769231	0.153846	0	0.230769	0.230769
JU1924	1	0	1	2	6	3	13	0.0769231	0	0.0769231	0.153846	0.461538	0.230769
MY2291	3	3	0	2	4	1	13	0.230769	0.230769	0	0.153846	0.307692	0.0769231
MY2688	5	4	0	1	1	2	13	0.384615	0.307692	0	0.0769231	0.0769231	0.153846
MY2689	2	3	2	2	0	4	13	0.153846	0.230769	0.153846	0.153846	0	0.307692
MY887	3	1	3	1	1	4	13	0.230769	0.0769231	0.230769	0.0769231	0.0769231	0.307692
NIC232	8	1	0	2	0	2	13	0.615385	0.0769231	0	0.153846	0	0.153846
WN2021	3	4	0	0	3	3	13	0.230769	0.307692	0	0	0.230769	0.230769
ECA246	1	5	1	3	2	2	14	0.0714286	0.357143	0.0714286	0.214286	0.142857	0.142857
ECA925	1	5	0	1	1	6	14	0.0714286	0.357143	0	0.0714286	0.0714286	0.428571
JU2468	5	3	0	1	1	4	14	0.357143	0.214286	0	0.0714286	0.0714286	0.285714
MY2054	5	1	1	5	1	1	14	0.357143	0.0714286	0.0714286	0.357143	0.0714286	0.0714286
MY2137	3	3	0	1	2	5	14	0.214286	0.214286	0	0.0714286	0.142857	0.357143
MY2622	2	6	1	0	1	4	14	0.142857	0.428571	0.0714286	0	0.0714286	0.285714
MY2681	4	4	0	1	3	2	14	0.285714	0.285714	0	0.0714286	0.214286	0.142857
MY538	3	4	2	2	2	1	14	0.214286	0.285714	0.142857	0.142857	0.142857	0.0714286
MY741	4	1	3	1	3	2	14	0.285714	0.0714286	0.214286	0.0714286	0.214286	0.142857
MY904	6	1	1	1	4	1	14	0.428571	0.0714286	0.0714286	0.0714286	0.285714	0.0714286
NIC1788	7	1	2	1	0	3	14	0.5	0.0714286	0.142857	0.0714286	0	0.214286
NIC237	4	3	1	3	1	2	14	0.285714	0.214286	0.0714286	0.214286	0.0714286	0.142857
QG538	2	2	1	2	2	5	14	0.142857	0.142857	0.0714286	0.142857	0.142857	0.357143
CX11314	6	4	0	2	0	3	15	0.4	0.266667	0	0.133333	0	0.2
ECA1296	3	3	0	4	3	2	15	0.2	0.2	0	0.266667	0.2	0.133333
ECA774	3	4	0	2	3	3	15	0.2	0.266667	0	0.133333	0.2	0.2
JU3138	8	1	1	3	1	1	15	0.533333	0.0666667	0.0666667	0.2	0.0666667	0.0666667
JU3400	3	2	1	4	1	4	15	0.2	0.133333	0.0666667	0.266667	0.0666667	0.266667
MY2692	6	0	1	2	3	3	15	0.4	0	0.0666667	0.133333	0.2	0.2
NIC270	5	3	0	3	1	3	15	0.333333	0.2	0	0.2	0.0666667	0.2
WN2016	3	4	0	3	1	4	15	0.2	0.266667	0	0.2	0.0666667	0.266667
WN2018	2	3	0	2	3	5	15	0.133333	0.2	0	0.133333	0.2	0.333333
ECA1258	3	2	2	4	1	4	16	0.1875	0.125	0.125	0.25	0.0625	0.25
ECA714	6	1	3	2	0	4	16	0.375	0.0625	0.1875	0.125	0	0.25
ECA715	2	3	0	6	1	4	16	0.125	0.1875	0	0.375	0.0625	0.25
ECA922	5	3	0	2	3	3	16	0.3125	0.1875	0	0.125	0.1875	0.1875
MY2051	11	1	0	1	1	2	16	0.6875	0.0625	0	0.0625	0.0625	0.125
MY2443	6	3	1	2	1	3	16	0.375	0.1875	0.0625	0.125	0.0625	0.1875
NIC1794	3	7	1	1	0	4	16	0.1875	0.4375	0.0625	0.0625	0	0.25
NIC1795	6	2	0	7	1	0	16	0.375	0.125	0	0.4375	0.0625	0
NIC231	7	2	1	1	0	5	16	0.4375	0.125	0.0625	0.0625	0	0.3125
WN2074	4	6	0	3	0	3	16	0.25	0.375	0	0.1875	0	0.1875
WN2075	3	4	2	5	1	1	16	0.1875	0.25	0.125	0.3125	0.0625	0.0625
ECA1221	7	2	1	3	1	3	17	0.411765	0.117647	0.0588235	0.176471	0.0588235	0.176471
ECA1256	4	6	1	4	1	1	17	0.235294	0.352941	0.0588235	0.235294	0.0588235	0.0588235
ECA1292	2	3	3	2	3	4	17	0.117647	0.176471	0.176471	0.117647	0.176471	0.235294
ECA754	5	2	1	4	2	3	17	0.294118	0.117647	0.0588235	0.235294	0.117647	0.176471
ECA808	5	3	2	2	3	2	17	0.294118	0.176471	0.117647	0.117647	0.176471	0.117647
JU1656	6	3	1	3	0	4	17	0.352941	0.176471	0.0588235	0.176471	0	0.235294
JU3402	5	6	0	1	0	5	17	0.294118	0.352941	0	0.0588235	0	0.294118
MY524	5	1	2	2	4	3	17	0.294118	0.0588235	0.117647	0.117647	0.235294	0.176471
MY564	7	4	1	2	0	3	17	0.411765	0.235294	0.0588235	0.117647	0	0.176471
NIC4	3	5	0	2	3	4	17	0.176471	0.294118	0	0.117647	0.176471	0.235294
WN2001	5	5	0	2	2	3	17	0.294118	0.294118	0	0.117647	0.117647	0.176471
WN2010	3	4	0	1	5	4	17	0.176471	0.235294	0	0.0588235	0.294118	0.235294
WN2014	5	2	1	1	2	6	17	0.294118	0.117647	0.0588235	0.0588235	0.117647	0.352941
ECA393	6	5	1	2	2	2	18	0.333333	0.277778	0.0555556	0.111111	0.111111	0.111111
MY803	6	3	1	4	3	1	18	0.333333	0.166667	0.0555556	0.222222	0.166667	0.0555556
NIC521	6	4	2	1	0	5	18	0.333333	0.222222	0.111111	0.0555556	0	0.277778
QG2844	7	7	0	1	1	2	18	0.388889	0.388889	0	0.0555556	0.0555556	0.111111
ECA1255	7	4	1	3	3	1	19	0.368421	0.210526	0.0526316	0.157895	0.157895	0.0526316
ECA807	8	3	1	2	3	2	19	0.421053	0.157895	0.0526316	0.105263	0.157895	0.105263
JU1807	6	1	1	2	2	7	19	0.315789	0.0526316	0.0526316	0.105263	0.105263	0.368421
JU3403	5	6	2	2	2	2	19	0.263158	0.315789	0.105263	0.105263	0.105263	0.105263
MY2079	3	5	2	5	2	2	19	0.157895	0.263158	0.105263	0.263158	0.105263	0.105263
MY2502	3	6	0	3	5	2	19	0.157895	0.315789	0	0.157895	0.263158	0.105263
QG2876	3	3	1	3	2	7	19	0.157895	0.157895	0.0526316	0.157895	0.105263	0.368421
ECA1262	3	9	0	2	1	5	20	0.15	0.45	0	0.1	0.05	0.25
JU1762	8	3	1	2	1	5	20	0.4	0.15	0.05	0.1	0.05	0.25
JU1793	1	11	0	3	3	2	20	0.05	0.55	0	0.15	0.15	0.1
JU3227	6	0	1	6	2	5	20	0.3	0	0.05	0.3	0.1	0.25
MY508	6	6	1	1	6	0	20	0.3	0.3	0.05	0.05	0.3	0
NIC527	3	6	0	3	2	6	20	0.15	0.3	0	0.15	0.1	0.3
ECA1275	5	3	0	2	8	3	21	0.238095	0.142857	0	0.0952381	0.380952	0.142857
ECA1413	4	4	0	6	2	5	21	0.190476	0.190476	0	0.285714	0.0952381	0.238095
MY2199	5	4	2	3	1	6	21	0.238095	0.190476	0.0952381	0.142857	0.047619	0.285714
WN2067	6	8	0	3	2	2	21	0.285714	0.380952	0	0.142857	0.0952381	0.0952381
ECA1415	3	3	1	7	2	6	22	0.136364	0.136364	0.0454545	0.318182	0.0909091	0.272727
ECA769	6	4	3	2	0	7	22	0.272727	0.181818	0.136364	0.0909091	0	0.318182
MY2541	4	7	2	2	1	6	22	0.181818	0.318182	0.0909091	0.0909091	0.0454545	0.272727
NIC236	8	2	1	2	4	5	22	0.363636	0.0909091	0.0454545	0.0909091	0.181818	0.227273
QX1214	6	2	1	3	4	6	22	0.272727	0.0909091	0.0454545	0.136364	0.181818	0.272727
ECA709	5	6	1	2	1	8	23	0.217391	0.26087	0.0434783	0.0869565	0.0434783	0.347826
ECA757	10	2	1	0	2	8	23	0.434783	0.0869565	0.0434783	0	0.0869565	0.347826
ECA785	4	7	2	0	2	8	23	0.173913	0.304348	0.0869565	0	0.0869565	0.347826
JU1516	5	7	1	4	1	5	23	0.217391	0.304348	0.0434783	0.173913	0.0434783	0.217391
JU2802	6	5	2	4	3	3	23	0.26087	0.217391	0.0869565	0.173913	0.130435	0.130435
JU312	4	7	3	2	2	5	23	0.173913	0.304348	0.130435	0.0869565	0.0869565	0.217391
MY2635	10	3	1	4	3	2	23	0.434783	0.130435	0.0434783	0.173913	0.130435	0.0869565
NIC197	6	8	0	2	2	5	23	0.26087	0.347826	0	0.0869565	0.0869565	0.217391
QG558	5	8	1	3	5	1	23	0.217391	0.347826	0.0434783	0.130435	0.217391	0.0434783
ECA786	9	5	1	0	3	6	24	0.375	0.208333	0.0416667	0	0.125	0.25
JU1931	8	6	0	5	2	3	24	0.333333	0.25	0	0.208333	0.0833333	0.125
MY2078	8	7	1	2	3	3	24	0.333333	0.291667	0.0416667	0.0833333	0.125	0.125
MY2693	7	2	1	1	3	10	24	0.291667	0.0833333	0.0416667	0.0416667	0.125	0.416667
ECA708	6	7	2	3	2	5	25	0.24	0.28	0.08	0.12	0.08	0.2
ECA1295	7	8	4	3	2	2	26	0.269231	0.307692	0.153846	0.115385	0.0769231	0.0769231
ECA760	6	7	1	8	1	3	26	0.230769	0.269231	0.0384615	0.307692	0.0384615	0.115385
MY2042	14	2	1	2	5	2	26	0.538462	0.0769231	0.0384615	0.0769231	0.192308	0.0769231
NIC267	11	5	2	3	1	4	26	0.423077	0.192308	0.0769231	0.115385	0.0384615	0.153846
WN2059	7	6	2	3	4	4	26	0.269231	0.230769	0.0769231	0.115385	0.153846	0.153846
BRC20067	6	4	4	4	4	5	27	0.222222	0.148148	0.148148	0.148148	0.148148	0.185185
ECA1298	6	10	1	4	2	4	27	0.222222	0.37037	0.037037	0.148148	0.0740741	0.148148
NIC198	9	5	3	1	8	1	27	0.333333	0.185185	0.111111	0.037037	0.296296	0.037037
ECA1237	4	11	2	2	3	6	28	0.142857	0.392857	0.0714286	0.0714286	0.107143	0.214286
ECA734	8	6	1	4	2	7	28	0.285714	0.214286	0.0357143	0.142857	0.0714286	0.25
ECA782	8	7	2	3	2	6	28	0.285714	0.25	0.0714286	0.107143	0.0714286	0.214286
JU1770	6	10	1	2	2	7	28	0.214286	0.357143	0.0357143	0.0714286	0.0714286	0.25
MY2685	4	3	4	6	4	7	28	0.142857	0.107143	0.142857	0.214286	0.142857	0.25
MY882	7	1	3	10	1	6	28	0.25	0.0357143	0.107143	0.357143	0.0357143	0.214286
QG2846	15	6	1	1	2	3	28	0.535714	0.214286	0.0357143	0.0357143	0.0714286	0.107143
ECA736	5	8	3	5	5	3	29	0.172414	0.275862	0.103448	0.172414	0.172414	0.103448
ECA738	5	8	2	3	5	6	29	0.172414	0.275862	0.0689655	0.103448	0.172414	0.206897
ECA779	8	3	0	6	5	7	29	0.275862	0.103448	0	0.206897	0.172414	0.241379
ECA926	9	5	2	4	1	8	29	0.310345	0.172414	0.0689655	0.137931	0.0344828	0.275862
JU3228	13	1	3	6	2	4	29	0.448276	0.0344828	0.103448	0.206897	0.0689655	0.137931
BRC20113	10	9	0	0	3	8	30	0.333333	0.3	0	0	0.1	0.266667
ECA928	9	1	1	4	4	11	30	0.3	0.0333333	0.0333333	0.133333	0.133333	0.366667
ED3049	9	6	0	1	4	10	30	0.3	0.2	0	0.0333333	0.133333	0.333333
NIC195	9	9	0	3	4	5	30	0.3	0.3	0	0.1	0.133333	0.166667
WN2070	13	4	0	5	5	3	30	0.433333	0.133333	0	0.166667	0.166667	0.1
ECA1273	9	8	1	2	2	9	31	0.290323	0.258065	0.0322581	0.0645161	0.0645161	0.290323
ECA1385	7	7	1	7	5	4	31	0.225806	0.225806	0.0322581	0.225806	0.16129	0.129032
ECA731	11	7	2	2	6	3	31	0.354839	0.225806	0.0645161	0.0645161	0.193548	0.0967742
ECA1213	7	8	3	4	2	8	32	0.21875	0.25	0.09375	0.125	0.0625	0.25
ECA551	9	3	2	3	4	11	32	0.28125	0.09375	0.0625	0.09375	0.125	0.34375
ECA756	5	11	1	3	6	6	32	0.15625	0.34375	0.03125	0.09375	0.1875	0.1875
MY2109	13	5	3	3	2	6	32	0.40625	0.15625	0.09375	0.09375	0.0625	0.1875
ECA1215	7	9	2	4	4	7	33	0.212121	0.272727	0.0606061	0.121212	0.121212	0.212121
ECA1222	7	10	2	5	2	7	33	0.212121	0.30303	0.0606061	0.151515	0.0606061	0.212121
ECA394	8	6	3	5	2	9	33	0.242424	0.181818	0.0909091	0.151515	0.0606061	0.272727
ECA720	13	9	0	3	4	4	33	0.393939	0.272727	0	0.0909091	0.121212	0.121212
JU1581	6	9	4	5	6	3	33	0.181818	0.272727	0.121212	0.151515	0.181818	0.0909091
MY2741	11	6	2	3	1	10	33	0.333333	0.181818	0.0606061	0.0909091	0.030303	0.30303
ECA395	11	7	0	6	2	8	34	0.323529	0.205882	0	0.176471	0.0588235	0.235294
ECA1294	8	12	2	5	3	5	35	0.228571	0.342857	0.0571429	0.142857	0.0857143	0.142857
TWN2794	16	10	2	3	0	4	35	0.457143	0.285714	0.0571429	0.0857143	0	0.114286
MY2099	12	4	1	7	4	8	36	0.333333	0.111111	0.0277778	0.194444	0.111111	0.222222
NIC3	14	9	2	1	8	2	36	0.388889	0.25	0.0555556	0.0277778	0.222222	0.0555556
ECA1264	7	7	1	4	10	8	37	0.189189	0.189189	0.027027	0.108108	0.27027	0.216216
ECA705	13	10	3	1	2	8	37	0.351351	0.27027	0.0810811	0.027027	0.0540541	0.216216
XZ1513	17	6	1	4	5	5	38	0.447368	0.157895	0.0263158	0.105263	0.131579	0.131579
ECA1208	10	5	1	10	3	10	39	0.25641	0.128205	0.025641	0.25641	0.0769231	0.25641
MY795	16	10	1	7	1	4	39	0.410256	0.25641	0.025641	0.179487	0.025641	0.102564
ECA1214	9	10	4	2	5	10	40	0.225	0.25	0.1	0.05	0.125	0.25
ECA1216	9	11	2	7	2	9	40	0.225	0.275	0.05	0.175	0.05	0.225
ECA1279	7	7	0	4	10	13	41	0.170732	0.170732	0	0.097561	0.243902	0.317073
ECA190	15	8	0	10	2	6	41	0.365854	0.195122	0	0.243902	0.0487805	0.146341
NIC1797	7	12	2	5	2	13	41	0.170732	0.292683	0.0487805	0.121951	0.0487805	0.317073
ECA1225	11	12	2	7	2	8	42	0.261905	0.285714	0.047619	0.166667	0.047619	0.190476
ECA1272	14	7	3	5	2	11	42	0.333333	0.166667	0.0714286	0.119048	0.047619	0.261905
ECA721	13	9	2	6	0	12	42	0.309524	0.214286	0.047619	0.142857	0	0.285714
MY2684	21	4	2	6	0	9	42	0.5	0.0952381	0.047619	0.142857	0	0.214286
ECA735	17	11	1	4	3	7	43	0.395349	0.255814	0.0232558	0.0930233	0.0697674	0.162791
MY2630	11	8	3	5	5	11	43	0.255814	0.186047	0.0697674	0.116279	0.116279	0.255814
QG2828	12	13	2	5	4	7	43	0.27907	0.302326	0.0465116	0.116279	0.0930233	0.162791
ECA192	10	10	4	7	4	9	44	0.227273	0.227273	0.0909091	0.159091	0.0909091	0.204545
ECA719	13	14	1	4	3	9	44	0.295455	0.318182	0.0227273	0.0909091	0.0681818	0.204545
ECA755	11	10	1	4	8	10	44	0.25	0.227273	0.0227273	0.0909091	0.181818	0.227273
JU1922	16	11	1	4	5	7	44	0.363636	0.25	0.0227273	0.0909091	0.113636	0.159091
QG2858	15	9	2	10	2	6	44	0.340909	0.204545	0.0454545	0.227273	0.0454545	0.136364
ECA1226	15	14	3	5	2	6	45	0.333333	0.311111	0.0666667	0.111111	0.0444444	0.133333
ECA1281	14	7	4	9	2	9	45	0.311111	0.155556	0.0888889	0.2	0.0444444	0.2
JU2800	8	5	2	9	8	13	45	0.177778	0.111111	0.0444444	0.2	0.177778	0.288889
JU3399	23	8	5	4	2	3	45	0.511111	0.177778	0.111111	0.0888889	0.0444444	0.0666667
NIC196	13	13	2	5	4	8	45	0.288889	0.288889	0.0444444	0.111111	0.0888889	0.177778
ECA1234	7	13	2	7	8	9	46	0.152174	0.282609	0.0434783	0.152174	0.173913	0.195652
ECA737	8	11	4	7	2	14	46	0.173913	0.23913	0.0869565	0.152174	0.0434783	0.304348
ECA772	16	14	1	5	2	8	46	0.347826	0.304348	0.0217391	0.108696	0.0434783	0.173913
ECA1246	10	16	4	8	2	7	47	0.212766	0.340426	0.0851064	0.170213	0.0425532	0.148936
ECA733	12	13	1	7	5	9	47	0.255319	0.276596	0.0212766	0.148936	0.106383	0.191489
ECA768	18	12	3	3	5	6	47	0.382979	0.255319	0.0638298	0.0638298	0.106383	0.12766
ECA1212	14	12	3	5	6	9	49	0.285714	0.244898	0.0612245	0.102041	0.122449	0.183673
ECA1267	15	10	1	5	8	10	49	0.306122	0.204082	0.0204082	0.102041	0.163265	0.204082
ECA193	20	14	1	5	1	8	49	0.408163	0.285714	0.0204082	0.102041	0.0204082	0.163265
ECA1266	10	10	3	9	6	12	50	0.2	0.2	0.06	0.18	0.12	0.24
QG2859	11	12	3	9	4	11	50	0.22	0.24	0.06	0.18	0.08	0.22
ECA1201	13	13	4	6	8	7	51	0.254902	0.254902	0.0784314	0.117647	0.156863	0.137255
ECA729	15	14	3	5	3	11	51	0.294118	0.27451	0.0588235	0.0980392	0.0588235	0.215686
JU1920	12	9	4	10	7	9	51	0.235294	0.176471	0.0784314	0.196078	0.137255	0.176471
ECA1217	18	14	2	4	8	6	52	0.346154	0.269231	0.0384615	0.0769231	0.153846	0.115385
JU1929	14	15	2	9	4	8	52	0.269231	0.288462	0.0384615	0.173077	0.0769231	0.153846
QG2823	16	13	2	6	4	11	52	0.307692	0.25	0.0384615	0.115385	0.0769231	0.211538
ECA1205	17	12	3	5	4	12	53	0.320755	0.226415	0.0566038	0.0943396	0.0754717	0.226415
ECA189	19	14	3	4	4	9	53	0.358491	0.264151	0.0566038	0.0754717	0.0754717	0.169811
ECA783	8	14	5	3	7	16	53	0.150943	0.264151	0.0943396	0.0566038	0.132075	0.301887
JU1941	15	18	4	10	2	5	54	0.277778	0.333333	0.0740741	0.185185	0.037037	0.0925926
ECA1218	8	15	1	8	9	15	56	0.142857	0.267857	0.0178571	0.142857	0.160714	0.267857
ECA1269	19	16	2	6	6	7	56	0.339286	0.285714	0.0357143	0.107143	0.107143	0.125
ECA397	19	12	5	2	10	8	56	0.339286	0.214286	0.0892857	0.0357143	0.178571	0.142857
ECA751	15	17	2	3	2	17	56	0.267857	0.303571	0.0357143	0.0535714	0.0357143	0.303571
ECA1203	11	18	7	6	5	10	57	0.192982	0.315789	0.122807	0.105263	0.0877193	0.175439
WN2069	22	13	2	3	5	12	57	0.385965	0.22807	0.0350877	0.0526316	0.0877193	0.210526
ECA1441	18	13	6	7	4	10	58	0.310345	0.224138	0.103448	0.12069	0.0689655	0.172414
ECA1236	17	14	2	5	6	16	60	0.283333	0.233333	0.0333333	0.0833333	0.1	0.266667
ECA1241	14	13	2	6	12	13	60	0.233333	0.216667	0.0333333	0.1	0.2	0.216667
ECA822	20	15	1	6	5	13	60	0.333333	0.25	0.0166667	0.1	0.0833333	0.216667
ECA728	12	16	5	5	5	18	61	0.196721	0.262295	0.0819672	0.0819672	0.0819672	0.295082
QG556	11	17	4	6	11	12	61	0.180328	0.278689	0.0655738	0.0983607	0.180328	0.196721
ECA398	22	13	1	7	8	11	62	0.354839	0.209677	0.016129	0.112903	0.129032	0.177419
ECA725	12	19	4	4	10	13	62	0.193548	0.306452	0.0645161	0.0645161	0.16129	0.209677
QG2826	15	17	5	10	6	10	63	0.238095	0.269841	0.0793651	0.15873	0.0952381	0.15873
ECA1224	18	12	2	12	7	14	65	0.276923	0.184615	0.0307692	0.184615	0.107692	0.215385
ECA1243	26	13	1	3	8	14	65	0.4	0.2	0.0153846	0.0461538	0.123077	0.215385
ECA1265	12	16	3	11	7	17	66	0.181818	0.242424	0.0454545	0.166667	0.106061	0.257576
ED3046	19	16	3	8	5	15	66	0.287879	0.242424	0.0454545	0.121212	0.0757576	0.227273
QG2854	12	20	3	11	7	13	66	0.181818	0.30303	0.0454545	0.166667	0.106061	0.19697
ECA1274	17	11	11	9	4	15	67	0.253731	0.164179	0.164179	0.134328	0.0597015	0.223881
XZ2212	23	13	3	7	6	15	67	0.343284	0.19403	0.0447761	0.104478	0.0895522	0.223881
ECA1223	17	17	2	10	11	11	68	0.25	0.25	0.0294118	0.147059	0.161765	0.161765
ECA1263	21	21	2	5	8	11	68	0.308824	0.308824	0.0294118	0.0735294	0.117647	0.161765
NIC1798	20	18	1	7	9	13	68	0.294118	0.264706	0.0147059	0.102941	0.132353	0.191176
ECA399	12	18	2	15	6	16	69	0.173913	0.26087	0.0289855	0.217391	0.0869565	0.231884
ECA704	14	24	7	5	5	14	69	0.202899	0.347826	0.101449	0.0724638	0.0724638	0.202899
QG2856	19	11	5	11	8	15	69	0.275362	0.15942	0.0724638	0.15942	0.115942	0.217391
NIC508	27	15	3	9	5	11	70	0.385714	0.214286	0.0428571	0.128571	0.0714286	0.157143
ECA724	22	15	5	11	5	13	71	0.309859	0.211268	0.0704225	0.15493	0.0704225	0.183099
ECA1282	21	14	2	12	7	16	72	0.291667	0.194444	0.0277778	0.166667	0.0972222	0.222222
ECA253	23	16	7	13	6	8	73	0.315068	0.219178	0.0958904	0.178082	0.0821918	0.109589
ECA723	19	13	2	14	7	18	73	0.260274	0.178082	0.0273973	0.191781	0.0958904	0.246575
ECA726	17	15	1	17	8	15	73	0.232877	0.205479	0.0136986	0.232877	0.109589	0.205479
JU2604	24	15	5	4	10	15	73	0.328767	0.205479	0.0684932	0.0547945	0.136986	0.205479
ECA1277	21	17	5	13	5	13	74	0.283784	0.22973	0.0675676	0.175676	0.0675676	0.175676
ECA396	17	25	3	8	13	11	77	0.220779	0.324675	0.038961	0.103896	0.168831	0.142857
ECA1268	21	22	3	5	10	17	78	0.269231	0.282051	0.0384615	0.0641026	0.128205	0.217949
QG2845	30	18	2	11	8	9	78	0.384615	0.230769	0.025641	0.141026	0.102564	0.115385
ECA1293	18	22	2	8	15	14	79	0.227848	0.278481	0.0253165	0.101266	0.189873	0.177215
ECA1233	21	13	5	13	13	15	80	0.2625	0.1625	0.0625	0.1625	0.1625	0.1875
JU2600	27	18	5	13	8	9	80	0.3375	0.225	0.0625	0.1625	0.1	0.1125
ECA1239	18	19	6	8	15	15	81	0.222222	0.234568	0.0740741	0.0987654	0.185185	0.185185
MY18	24	9	11	19	6	12	81	0.296296	0.111111	0.135802	0.234568	0.0740741	0.148148
NIC1805	32	10	4	11	10	15	82	0.390244	0.121951	0.0487805	0.134146	0.121951	0.182927
ECA1270	23	24	4	10	13	9	83	0.277108	0.289157	0.0481928	0.120482	0.156627	0.108434
ECA1285	22	23	5	14	10	9	83	0.26506	0.277108	0.060241	0.168675	0.120482	0.108434
MY684	40	16	4	4	9	10	83	0.481928	0.192771	0.0481928	0.0481928	0.108434	0.120482
NIC1811	35	12	4	12	7	13	83	0.421687	0.144578	0.0481928	0.144578	0.0843373	0.156627
ECA2686	22	21	5	6	14	18	86	0.255814	0.244186	0.0581395	0.0697674	0.162791	0.209302
ECA747	28	23	6	8	6	15	86	0.325581	0.267442	0.0697674	0.0930233	0.0697674	0.174419
MY679	38	13	11	9	6	9	86	0.44186	0.151163	0.127907	0.104651	0.0697674	0.104651
ECA1260	28	22	6	6	7	18	87	0.321839	0.252874	0.0689655	0.0689655	0.0804598	0.206897
NIC199	27	19	1	6	9	25	87	0.310345	0.218391	0.0114943	0.0689655	0.103448	0.287356
NIC512	30	21	4	13	2	18	88	0.340909	0.238636	0.0454545	0.147727	0.0227273	0.204545
ECA1276	29	21	6	13	8	13	90	0.322222	0.233333	0.0666667	0.144444	0.0888889	0.144444
JU2605	39	18	7	14	4	8	90	0.433333	0.2	0.0777778	0.155556	0.0444444	0.0888889
MY2719	25	30	2	9	4	20	90	0.277778	0.333333	0.0222222	0.1	0.0444444	0.222222
ECA2679	24	20	10	14	11	13	92	0.26087	0.217391	0.108696	0.152174	0.119565	0.141304
NIC200	33	16	6	9	9	22	95	0.347368	0.168421	0.0631579	0.0947368	0.0947368	0.231579
ECA762	22	24	5	14	8	23	96	0.229167	0.25	0.0520833	0.145833	0.0833333	0.239583
ECA1229	17	26	7	19	7	21	97	0.175258	0.268041	0.0721649	0.195876	0.0721649	0.216495
ECA1271	27	25	6	11	10	18	97	0.278351	0.257732	0.0618557	0.113402	0.103093	0.185567
ECA1238	21	31	4	14	13	16	99	0.212121	0.313131	0.040404	0.141414	0.131313	0.161616
JU2581	29	19	4	15	11	21	99	0.292929	0.191919	0.040404	0.151515	0.111111	0.212121
ECA1284	27	23	5	12	10	23	100	0.27	0.23	0.05	0.12	0.1	0.23
ECA1290	29	22	5	11	9	24	100	0.29	0.22	0.05	0.11	0.09	0.24
ECA713	31	22	8	8	12	19	100	0.31	0.22	0.08	0.08	0.12	0.19

## Sheet: common variants (n>2, <10%)
	Ts	Tv	Ts/Tv	G/C:A/T	A/T:G/C	G/C:C/G	G/C:T/A	A/T:C/G	A/T:T/A	Total	G:C→A:T (%)	A:T→G:C (%)	G:C→C:G (%)	G:C→T:A (%)	A:T→C:G (%)	A:T→T:A (%)
common_variants	1243147	973526	1.28	665409	577738	117462	253171	216084	386809	2216673	0.300184	0.260633	0.0529902	0.114212	0.0974812	0.1745

## Sheet: Readme
The first worksheet shows the list of the 444 wild isolates which carry 100 or fewer private alleles (n=11,667 private alleles), the set of private alleles for each isolate, and the frequency of each type of mutation. The second worksheet shows the same information for common variants. "Common" variants are defined as variants present in more than one isolate but with an upper bound of 10% on the…
