# Supplementary material for: Mutability of mononucleotide repeats, not oxidative stress, explains the discrepancy between laboratory-accumulated mutations and the natural allele-frequency spectrum in C. elegans
Source: HighWire-hosted journal article supplement (doi:10.1101/gr.275372.121), 2021-08-17
Supplement: Supplemental_Table_S11.xlsx.xlsx [file Supplemental_Table_S11.xlsx.xlsx]

## Sheet: whole-genome
strain	line	depth	sequencer	read length	G/C:A/T	A/T:G/C	G/C:C/G	G/C:T/A	A/T:C/G	A/T:T/A
N2	505	41.09	NovaSeq	150	0.309524	0.0714286	0.047619	0.190476	0.166667	0.214286
N2	512	21.54	NovaSeq	150	0.297872	0.170213	0.106383	0.106383	0.148936	0.170213
N2	513	36.22	NovaSeq	150	0.215385	0.169231	0.0461538	0.0615385	0.0615385	0.446154
N2	520	38.09	NovaSeq	150	0.32	0.0933333	0.0933333	0.12	0.08	0.293333
N2	523	29.73	NovaSeq	150	0.257143	0.114286	0.0714286	0.157143	0.0571429	0.342857
N2	524	27.43	NovaSeq	150	0.391892	0.108108	0.0405405	0.0810811	0.0540541	0.324324
N2	526	27.09	NovaSeq	150	0.25	0.0769231	0.0769231	0.173077	0.0961538	0.326923
N2	531	73.21	NovaSeq	150	0.272727	0.136364	0.0681818	0.181818	0	0.340909
N2	532	369.16	NovaSeq	150	0.295455	0.181818	0.0454545	0.181818	0.0227273	0.272727
N2	536	39.45	NovaSeq	150	0.25	0.214286	0.0535714	0.142857	0.142857	0.196429
N2	540	45.26	NovaSeq	150	0.265306	0.142857	0.0612245	0.163265	0.0816327	0.285714
N2	541	21.89	NovaSeq	150	0.318182	0.136364	0.0909091	0.159091	0.113636	0.181818
N2	542	36.57	NovaSeq	150	0.270833	0.229167	0.0833333	0.0833333	0.125	0.208333
N2	543	30.37	NovaSeq	150	0.188679	0.132075	0.0566038	0.188679	0.113208	0.320755
N2	544	36.03	NovaSeq	150	0.217391	0.130435	0.057971	0.15942	0.115942	0.318841
N2	545	28.24	NovaSeq	150	0.290323	0.16129	0.0483871	0.0806452	0.0483871	0.370968
N2	546	39.99	NovaSeq	150	0.289855	0.101449	0.0869565	0.0869565	0.0869565	0.347826
N2	551	48.94	NovaSeq	150	0.4	0.1	0.125	0.05	0.075	0.25
N2	553	44.12	NovaSeq	150	0.268293	0.170732	0.0731707	0.292683	0	0.195122
N2	554	36.41	NovaSeq	150	0.293103	0.0862069	0.0689655	0.0689655	0.0862069	0.396552
N2	565	57.61	NovaSeq	150	0.326531	0.163265	0.0408163	0.102041	0.122449	0.244898
N2	567	27.44	NovaSeq	150	0.307692	0.134615	0.0961538	0.115385	0.0384615	0.307692
N2	574	42.88	NovaSeq	150	0.173913	0.0652174	0.0869565	0.304348	0.0869565	0.282609
N2	577	30.78	NovaSeq	150	0.22	0.2	0.08	0.2	0.02	0.28
N2	578	36	NovaSeq	150	0.378378	0.0540541	0.108108	0.189189	0.027027	0.243243
N2	579	46.91	NovaSeq	150	0.304348	0.217391	0.0652174	0.108696	0.0869565	0.217391
N2	580	41.95	NovaSeq	150	0.326087	0.173913	0.0434783	0.130435	0.0869565	0.23913
N2	581	35.94	NovaSeq	150	0.285714	0.0892857	0	0.160714	0.107143	0.357143
N2	582	29.34	NovaSeq	150	0.276596	0.106383	0.12766	0.0638298	0.106383	0.319149
N2	584	50.39	NovaSeq	150	0.326923	0.153846	0.0384615	0.0769231	0.0769231	0.326923
N2	585	54.26	NovaSeq	150	0.263158	0.0526316	0.0526316	0.210526	0.184211	0.236842
N2	586	32.52	NovaSeq	150	0.306452	0.145161	0.0483871	0.0806452	0.0967742	0.322581
N2	589	32.31	NovaSeq	150	0.255319	0.0638298	0.0638298	0.106383	0.106383	0.404255
N2	591	39.63	NovaSeq	150	0.244898	0.183673	0.122449	0.142857	0.0408163	0.265306
N2	593	36.33	NovaSeq	150	0.390625	0.15625	0.046875	0.0625	0.109375	0.234375
N2	594	35.07	NovaSeq	150	0.207547	0.188679	0.0943396	0.188679	0.0754717	0.245283
N2	597	56.75	NovaSeq	150	0.340909	0.113636	0.0681818	0.136364	0.0454545	0.295455
N2	598	34.72	NovaSeq	150	0.22	0.2	0.08	0.18	0.06	0.26
PB306	402	49.02	NovaSeq	150	0.257143	0.142857	0.0428571	0.185714	0.128571	0.242857
PB306	403	40.57	NovaSeq	150	0.270833	0.0625	0.104167	0.208333	0.0625	0.291667
PB306	406	41.34	NovaSeq	150	0.325	0.05	0.075	0.175	0.025	0.35
PB306	414	36.83	NovaSeq	150	0.272727	0.159091	0.0909091	0.159091	0.0454545	0.272727
PB306	415	37.37	NovaSeq	150	0.380952	0.142857	0.047619	0.047619	0.119048	0.261905
PB306	420	40.33	NovaSeq	150	0.363636	0.181818	0.0909091	0.145455	0.0727273	0.145455
PB306	423	44.4	NovaSeq	150	0.258621	0.172414	0.0344828	0.155172	0.0689655	0.310345
PB306	425	17.27	NovaSeq	150	0.307692	0.153846	0.0769231	0.173077	0.0384615	0.25
PB306	429	44.44	NovaSeq	150	0.246377	0.202899	0.115942	0.15942	0.0869565	0.188406
PB306	430	32.07	NovaSeq	150	0.227273	0.136364	0.113636	0.159091	0.0454545	0.318182
PB306	432	57.24	NovaSeq	150	0.301887	0.169811	0.0754717	0.207547	0.0943396	0.150943
PB306	435	39.13	NovaSeq	150	0.309524	0.047619	0.166667	0.166667	0.0714286	0.238095
PB306	436	42.14	NovaSeq	150	0.230769	0.173077	0.0961538	0.115385	0.115385	0.269231
PB306	437	30.57	NovaSeq	150	0.340426	0.0851064	0.0851064	0.297872	0.0638298	0.12766
PB306	440	22.09	NovaSeq	150	0.382979	0.106383	0.0851064	0.276596	0.0212766	0.12766
PB306	443	43.42	NovaSeq	150	0.386364	0.0909091	0.0909091	0.181818	0.0454545	0.204545
PB306	449	31.91	NovaSeq	150	0.324324	0.0810811	0.108108	0.243243	0.027027	0.216216
PB306	450	37.89	NovaSeq	150	0.346154	0.192308	0.0576923	0.153846	0.134615	0.115385
PB306	456	35.2	NovaSeq	150	0.261905	0.119048	0.166667	0.142857	0.047619	0.261905
PB306	458	44.38	NovaSeq	150	0.320755	0.0566038	0.150943	0.150943	0.0754717	0.245283
PB306	461	41.9	NovaSeq	150	0.243902	0.0731707	0.0487805	0.195122	0.0731707	0.365854
PB306	462	57.39	NovaSeq	150	0.166667	0.233333	0.1	0.2	0.1	0.2
PB306	466	42.98	NovaSeq	150	0.285714	0.183673	0.0612245	0.0816327	0.102041	0.285714
PB306	468	32.81	NovaSeq	150	0.28	0.22	0.1	0.12	0.02	0.26
PB306	470	47.28	NovaSeq	150	0.258065	0.129032	0.0967742	0.225806	0.0967742	0.193548
PB306	474	34.99	NovaSeq	150	0.404762	0.0714286	0.047619	0.190476	0.0952381	0.190476
PB306	475	35.29	NovaSeq	150	0.254902	0.117647	0.0784314	0.137255	0.117647	0.294118
PB306	476	81.48	NovaSeq	150	0.26087	0.130435	0.0434783	0.130435	0.0652174	0.369565
PB306	477	42.31	NovaSeq	150	0.341463	0.121951	0.0243902	0.146341	0.0731707	0.292683
PB306	480	32.34	NovaSeq	150	0.230769	0.115385	0.0961538	0.134615	0.0961538	0.326923
PB306	482	37.2	NovaSeq	150	0.230769	0.153846	0.0769231	0.153846	0.102564	0.282051
PB306	483	39.88	NovaSeq	150	0.384615	0.153846	0.0512821	0.153846	0.102564	0.153846
PB306	486	99.83	NovaSeq	150	0.346939	0.0816327	0.0612245	0.163265	0.0816327	0.265306
PB306	488	39.37	NovaSeq	150	0.327869	0.0655738	0.0655738	0.278689	0.0655738	0.196721
PB306	489	47.22	NovaSeq	150	0.307692	0.0769231	0.0384615	0.211538	0.0961538	0.269231
PB306	490	53.25	NovaSeq	150	0.288462	0.134615	0.0576923	0.115385	0.192308	0.211538
PB306	495	35.64	NovaSeq	150	0.340426	0.170213	0.0425532	0.0851064	0.0638298	0.297872
PB306	498	39.22	NovaSeq	150	0.363636	0.0909091	0.0681818	0.204545	0.0454545	0.227273
wild	ECA1074	64.0419	NovaSeq	150	0.322088	0.230924	0.051004	0.123695	0.0855422	0.186747
wild	ECA1205	32.7108	NovaSeq	150	0.30015	0.245758	0.0541417	0.107784	0.0873253	0.20484
wild	ECA1216	42.3394	NovaSeq	150	0.295385	0.231491	0.0567951	0.116379	0.0986308	0.201318
wild	ECA1223	51.3183	NovaSeq	150	0.306266	0.242967	0.0585038	0.116368	0.0898338	0.186061
wild	ECA1225	25.5953	NovaSeq	150	0.316514	0.232534	0.0536344	0.101623	0.0917431	0.203952
wild	ECA1237	44.3072	NovaSeq	150	0.300603	0.234793	0.0617462	0.118773	0.0972732	0.186812
wild	ECA1238	62.7377	NovaSeq	150	0.278351	0.28866	0.0618557	0.0824742	0.0927835	0.195876
wild	ECA1239	41.9577	NovaSeq	150	0.289474	0.302632	0.0657895	0.0657895	0.0921053	0.184211
wild	ECA1241	33.0394	NovaSeq	150	0.304373	0.259814	0.0508075	0.117176	0.0902982	0.177532
wild	ECA1257	33.2578	NovaSeq	150	0.339839	0.239157	0.0501859	0.121747	0.0855019	0.163569
wild	ECA1260	38.092	NovaSeq	150	0.317647	0.25469	0.0499205	0.122576	0.0831479	0.172019
wild	ECA1263	29.718	NovaSeq	150	0.447761	0.223881	0.0298507	0.104478	0.104478	0.0895522
wild	ECA1267	26.0543	NovaSeq	150	0.299145	0.230769	0.153846	0.0769231	0.0683761	0.17094
wild	ECA1268	31.8128	NovaSeq	150	0.326316	0.252632	0.0526316	0.157895	0.0736842	0.136842
wild	ECA1269	31.6611	NovaSeq	150	0.360465	0.232558	0.0813953	0.0697674	0.139535	0.116279
wild	ECA1276	38.1602	NovaSeq	150	0.25	0.1875	0.075	0.1125	0.175	0.2
wild	ECA1277	33.2728	NovaSeq	150	0.22807	0.280702	0.0701754	0.192982	0.0701754	0.157895
wild	ECA1281	50.2041	NovaSeq	150	0.252336	0.252336	0.046729	0.140187	0.0934579	0.214953
wild	ECA1285	34.0892	NovaSeq	150	0.298117	0.248961	0.0584495	0.117388	0.0885302	0.188555
wild	ECA1293	64.141	NovaSeq	150	0.301518	0.242861	0.0625161	0.113712	0.0910728	0.18832
wild	ECA1298	56.5769	NovaSeq	150	0.296336	0.250133	0.0520446	0.124801	0.0913436	0.185343
wild	ECA1413	41.2776	NovaSeq	150	0.31136	0.234453	0.055141	0.124585	0.0887231	0.185738
wild	ECA724	43.9297	NovaSeq	150	0.285714	0.178571	0.0714286	0.142857	0.142857	0.178571
wild	ECA725	36.9849	NovaSeq	150	0.24359	0.294872	0.0641026	0.0512821	0.115385	0.230769
wild	ECA726	39.5225	NovaSeq	150	0.253968	0.269841	0.015873	0.174603	0.0793651	0.206349
wild	ECA762	49.1202	NovaSeq	150	0.25	0.284091	0.0454545	0.125	0.102273	0.193182
wild	ECA812	55.3482	NovaSeq	150	0.341463	0.207317	0.0609756	0.109756	0.0609756	0.219512
wild	JU3401	57.873	NovaSeq	150	0.318565	0.233273	0.06088	0.116637	0.0898131	0.180832
wild	NIC1788	79.8957	NovaSeq	150	0.359375	0.203125	0.06875	0.1125	0.0875	0.16875
wild	NIC1794	104.078	NovaSeq	150	0.302316	0.245712	0.0578902	0.12693	0.100772	0.166381
wild	NIC1797	60.7139	NovaSeq	150	0.234286	0.262857	0.04	0.131429	0.131429	0.2
wild	NIC1798	72.7487	NovaSeq	150	0.224852	0.218935	0.0621302	0.118343	0.133136	0.242604
wild	NIC1805	72.7203	NovaSeq	150	0.302905	0.248963	0.0539419	0.116183	0.0788382	0.19917
wild	NIC1811	59.81	NovaSeq	150	0.38	0.18	0.06	0.1	0.08	0.2
wild	TWN2542	77.9751	NovaSeq	150	0.419355	0.322581	0.129032	0	0.0967742	0.0322581
wild	TWN2794	63.6081	NovaSeq	150	0.314286	0.314286	0	0.0857143	0.114286	0.171429
wild	TWN2803	55.9607	NovaSeq	150	0.142857	0.142857	0.0714286	0.142857	0.142857	0.357143
wild	WN2071	50.2818	NovaSeq	150	0.318535	0.22919	0.0621532	0.117092	0.0893452	0.183685

## Sheet: mono
strain	line	G/C:A/T	A/T:G/C	G/C:C/G	G/C:T/A	A/T:C/G	A/T:T/A
N2	505	0.166667	0	0	0.0833333	0.0833333	0.666667
N2	512	0	0	0.0769231	0.230769	0.0769231	0.615385
N2	513	0	0.0416667	0	0.0416667	0.0833333	0.833333
N2	520	0.238095	0.047619	0	0.047619	0	0.666667
N2	523	0	0	0	0.0666667	0	0.933333
N2	524	0.28	0.04	0	0.04	0	0.64
N2	526	0	0.0666667	0	0.133333	0	0.8
N2	531	0.0625	0.125	0.0625	0.125	0	0.625
N2	532	0	0.222222	0	0.111111	0	0.666667
N2	536	0.0909091	0	0	0.0909091	0.181818	0.636364
N2	540	0.133333	0.2	0.0666667	0.0666667	0.0666667	0.466667
N2	541	0.142857	0	0	0	0.142857	0.714286
N2	542	0.153846	0.307692	0	0	0.0769231	0.461538
N2	543	0	0.125	0.0625	0	0	0.8125
N2	544	0.0555556	0.166667	0	0	0.166667	0.611111
N2	545	0.0555556	0.0555556	0.111111	0	0	0.777778
N2	546	0	0.1	0	0	0.05	0.85
N2	551	0.125	0.125	0	0	0	0.75
N2	553	0	0.0833333	0.0833333	0.333333	0	0.5
N2	554	0.05	0	0.1	0	0.1	0.75
N2	565	0	0.333333	0.166667	0.166667	0	0.333333
N2	567	0.0625	0.125	0	0	0	0.8125
N2	574	0	0	0	0.181818	0.0909091	0.727273
N2	577	0.142857	0.0714286	0	0	0.0714286	0.714286
N2	578	0.111111	0	0	0.111111	0.111111	0.666667
N2	579	0	0.125	0.125	0.125	0	0.625
N2	580	0	0.222222	0	0	0.111111	0.666667
N2	581	0.0588235	0	0	0.176471	0	0.764706
N2	582	0.0769231	0.0769231	0	0	0.0769231	0.769231
N2	584	0.0588235	0	0	0	0.117647	0.823529
N2	585	0.133333	0.0666667	0.0666667	0.0666667	0.266667	0.4
N2	586	0.0666667	0.266667	0.0666667	0.0666667	0.0666667	0.466667
N2	589	0	0	0	0	0.0769231	0.923077
N2	591	0.2	0	0.1	0	0	0.7
N2	593	0.2	0.0666667	0	0	0	0.733333
N2	594	0	0.0833333	0	0	0.0833333	0.833333
N2	597	0.0769231	0.153846	0	0.0769231	0.0769231	0.615385
N2	598	0.0833333	0	0.0833333	0	0.166667	0.666667
PB306	402	0.142857	0.0714286	0	0	0.142857	0.642857
PB306	403	0	0.153846	0	0.230769	0.153846	0.461538
PB306	406	0.153846	0	0	0.0769231	0	0.769231
PB306	414	0.230769	0.153846	0	0	0.0769231	0.538462
PB306	415	0	0	0	0	0.181818	0.818182
PB306	420	0.111111	0.222222	0	0.111111	0.111111	0.444444
PB306	423	0.176471	0.0588235	0	0.0588235	0.117647	0.588235
PB306	425	0	0.125	0	0.125	0.125	0.625
PB306	429	0.142857	0.0714286	0	0.0714286	0	0.714286
PB306	430	0.0909091	0.0909091	0.0909091	0	0.0909091	0.636364
PB306	432	0	0.4	0	0	0	0.6
PB306	435	0.214286	0.0714286	0.142857	0.142857	0	0.428571
PB306	436	0	0.125	0	0	0.25	0.625
PB306	437	0.272727	0.0909091	0	0.181818	0.181818	0.272727
PB306	440	0.111111	0.111111	0.111111	0.222222	0	0.444444
PB306	443	0.25	0.125	0.125	0	0.125	0.375
PB306	449	0.1	0	0	0.2	0	0.7
PB306	450	0	0	0.111111	0.111111	0.222222	0.555556
PB306	456	0.0909091	0.0909091	0	0	0	0.818182
PB306	458	0.0769231	0	0.0769231	0.230769	0	0.615385
PB306	461	0	0	0	0.166667	0.0833333	0.75
PB306	462	0	0.142857	0	0	0.142857	0.714286
PB306	466	0.285714	0.0714286	0.0714286	0.0714286	0.0714286	0.428571
PB306	468	0.181818	0.0909091	0	0.0909091	0	0.636364
PB306	470	0	0.166667	0	0	0	0.833333
PB306	474	0.166667	0	0	0.333333	0	0.5
PB306	475	0.157895	0	0.0526316	0.105263	0.105263	0.578947
PB306	476	0.0769231	0	0	0	0.0769231	0.846154
PB306	477	0.363636	0.0909091	0	0	0.0909091	0.454545
PB306	480	0.0833333	0.0833333	0	0.0833333	0	0.75
PB306	482	0.0909091	0	0.0909091	0.0909091	0	0.727273
PB306	483	0.25	0.25	0	0	0.25	0.25
PB306	486	0.166667	0	0	0	0.0833333	0.75
PB306	488	0.0909091	0	0	0.181818	0.0909091	0.636364
PB306	489	0.1	0.1	0	0.1	0.1	0.6
PB306	490	0.0833333	0.166667	0.0833333	0	0.166667	0.5
PB306	495	0.0625	0.125	0	0.0625	0.0625	0.6875
PB306	498	0.230769	0	0	0.0769231	0.0769231	0.615385
wild	ECA1074	0.176238	0.213861	0.0356436	0.106931	0.124752	0.342574
wild	ECA1205	0.184478	0.236641	0.0407125	0.06743	0.108142	0.362595
wild	ECA1216	0.165441	0.240196	0.0257353	0.0894608	0.13848	0.340686
wild	ECA1223	0.173986	0.260135	0.0388514	0.0726351	0.101351	0.353041
wild	ECA1225	0.149912	0.232804	0.0194004	0.0881834	0.132275	0.377425
wild	ECA1237	0.160431	0.257451	0.0310717	0.0798985	0.144578	0.326569
wild	ECA1238	0.0666667	0.266667	0.0666667	0.0666667	0.133333	0.4
wild	ECA1239	0.2	0.4	0	0	0.0666667	0.333333
wild	ECA1241	0.165042	0.268356	0.0279402	0.0883691	0.11436	0.335932
wild	ECA1257	0.207607	0.267829	0.0269414	0.0855784	0.123613	0.288431
wild	ECA1260	0.19234	0.251915	0.026383	0.0885106	0.125957	0.314894
wild	ECA1263	0.3125	0.3125	0.0625	0.125	0.0625	0.125
wild	ECA1267	0.130435	0.304348	0.173913	0	0.173913	0.217391
wild	ECA1268	0.375	0.375	0	0.125	0.125	0
wild	ECA1269	0.454545	0.181818	0.0909091	0.0909091	0.0909091	0.0909091
wild	ECA1276	0.26087	0.304348	0	0.0434783	0.130435	0.26087
wild	ECA1277	0.2	0.4	0.1	0.1	0.1	0.1
wild	ECA1281	0.105263	0.315789	0.0526316	0.105263	0	0.421053
wild	ECA1285	0.153754	0.231228	0.0286055	0.090584	0.147795	0.348033
wild	ECA1293	0.17381	0.263095	0.027381	0.0916667	0.128571	0.315476
wild	ECA1298	0.175373	0.243781	0.0310945	0.114428	0.11194	0.323383
wild	ECA1413	0.182102	0.225806	0.0301769	0.0811655	0.141519	0.33923
wild	ECA724	0.375	0.375	0	0.125	0	0.125
wild	ECA725	0.142857	0.214286	0.142857	0	0.285714	0.214286
wild	ECA726	0	1	0	0	0	0
wild	ECA762	0.0714286	0.428571	0.0714286	0	0.214286	0.214286
wild	ECA812	0	0.222222	0	0	0.222222	0.555556
wild	JU3401	0.16129	0.241935	0.0435484	0.106452	0.11129	0.335484
wild	NIC1788	0.2	0.216667	0.05	0.1	0.116667	0.316667
wild	NIC1794	0.200461	0.25576	0.0230415	0.0898618	0.138249	0.292627
wild	NIC1797	0.12	0.2	0.04	0.16	0.12	0.36
wild	NIC1798	0.158416	0.277228	0.00990099	0.108911	0.138614	0.306931
wild	NIC1805	0.0862069	0.310345	0.0172414	0.0862069	0.12069	0.37931
wild	NIC1811	0	0.125	0	0.25	0.25	0.375
wild	TWN2542	0.5	0.5	0	0	0	0
wild	TWN2794	0.285714	0.285714	0	0.142857	0	0.285714
wild	TWN2803	0	0	0	0.333333	0.333333	0.333333
wild	WN2071	0.204878	0.25122	0.0487805	0.0780488	0.109756	0.307317

## Sheet: non-mono
strain	line	G/C:A/T	A/T:G/C	G/C:C/G	G/C:T/A	A/T:C/G	A/T:T/A
N2	505	0.366667	0.1	0.0666667	0.233333	0.2	0.0333333
N2	512	0.411765	0.235294	0.117647	0.0588235	0.176471	0
N2	513	0.341463	0.243902	0.0731707	0.0731707	0.0487805	0.219512
N2	520	0.351852	0.111111	0.12963	0.148148	0.111111	0.148148
N2	523	0.327273	0.145455	0.0909091	0.181818	0.0727273	0.181818
N2	524	0.44898	0.142857	0.0612245	0.102041	0.0816327	0.163265
N2	526	0.351351	0.0810811	0.108108	0.189189	0.135135	0.135135
N2	531	0.392857	0.142857	0.0714286	0.214286	0	0.178571
N2	532	0.371429	0.171429	0.0571429	0.2	0.0285714	0.171429
N2	536	0.288889	0.266667	0.0666667	0.155556	0.133333	0.0888889
N2	540	0.323529	0.117647	0.0588235	0.205882	0.0882353	0.205882
N2	541	0.351351	0.162162	0.108108	0.189189	0.108108	0.0810811
N2	542	0.314286	0.2	0.114286	0.114286	0.142857	0.114286
N2	543	0.27027	0.135135	0.0540541	0.27027	0.162162	0.108108
N2	544	0.27451	0.117647	0.0784314	0.215686	0.0980392	0.215686
N2	545	0.386364	0.204545	0.0227273	0.113636	0.0681818	0.204545
N2	546	0.408163	0.102041	0.122449	0.122449	0.102041	0.142857
N2	551	0.46875	0.09375	0.15625	0.0625	0.09375	0.125
N2	553	0.37931	0.206897	0.0689655	0.275862	0	0.0689655
N2	554	0.421053	0.131579	0.0526316	0.105263	0.0789474	0.210526
N2	565	0.372093	0.139535	0.0232558	0.0930233	0.139535	0.232558
N2	567	0.416667	0.138889	0.138889	0.166667	0.0555556	0.0833333
N2	574	0.228571	0.0857143	0.114286	0.342857	0.0857143	0.142857
N2	577	0.25	0.25	0.111111	0.277778	0	0.111111
N2	578	0.464286	0.0714286	0.142857	0.214286	0	0.107143
N2	579	0.368421	0.236842	0.0526316	0.105263	0.105263	0.131579
N2	580	0.405405	0.162162	0.0540541	0.162162	0.0810811	0.135135
N2	581	0.384615	0.128205	0	0.153846	0.153846	0.179487
N2	582	0.352941	0.117647	0.176471	0.0882353	0.117647	0.147059
N2	584	0.457143	0.228571	0.0571429	0.114286	0.0571429	0.0857143
N2	585	0.347826	0.0434783	0.0434783	0.304348	0.130435	0.130435
N2	586	0.382979	0.106383	0.0425532	0.0851064	0.106383	0.276596
N2	589	0.352941	0.0882353	0.0882353	0.147059	0.117647	0.205882
N2	591	0.25641	0.230769	0.128205	0.179487	0.0512821	0.153846
N2	593	0.44898	0.183673	0.0612245	0.0816327	0.142857	0.0816327
N2	594	0.268293	0.219512	0.121951	0.243902	0.0731707	0.0731707
N2	597	0.451613	0.0967742	0.0967742	0.16129	0.0322581	0.16129
N2	598	0.263158	0.263158	0.0789474	0.236842	0.0263158	0.131579
PB306	402	0.285714	0.160714	0.0535714	0.232143	0.125	0.142857
PB306	403	0.371429	0.0285714	0.142857	0.2	0.0285714	0.228571
PB306	406	0.407407	0.0740741	0.111111	0.222222	0.037037	0.148148
PB306	414	0.290323	0.16129	0.129032	0.225806	0.0322581	0.16129
PB306	415	0.516129	0.193548	0.0645161	0.0645161	0.0967742	0.0645161
PB306	420	0.413043	0.173913	0.108696	0.152174	0.0652174	0.0869565
PB306	423	0.292683	0.219512	0.0487805	0.195122	0.0487805	0.195122
PB306	425	0.363636	0.159091	0.0909091	0.181818	0.0227273	0.181818
PB306	429	0.272727	0.236364	0.145455	0.181818	0.109091	0.0545455
PB306	430	0.272727	0.151515	0.121212	0.212121	0.030303	0.212121
PB306	432	0.333333	0.145833	0.0833333	0.229167	0.104167	0.104167
PB306	435	0.357143	0.0357143	0.178571	0.178571	0.107143	0.142857
PB306	436	0.272727	0.181818	0.113636	0.136364	0.0909091	0.204545
PB306	437	0.361111	0.0833333	0.111111	0.333333	0.0277778	0.0833333
PB306	440	0.447368	0.105263	0.0789474	0.289474	0.0263158	0.0526316
PB306	443	0.416667	0.0833333	0.0833333	0.222222	0.0277778	0.166667
PB306	449	0.407407	0.111111	0.148148	0.259259	0.037037	0.037037
PB306	450	0.418605	0.232558	0.0465116	0.162791	0.116279	0.0232558
PB306	456	0.322581	0.129032	0.225806	0.193548	0.0645161	0.0645161
PB306	458	0.4	0.075	0.175	0.125	0.1	0.125
PB306	461	0.344828	0.103448	0.0689655	0.206897	0.0689655	0.206897
PB306	462	0.217391	0.26087	0.130435	0.26087	0.0869565	0.0434783
PB306	466	0.285714	0.228571	0.0571429	0.0857143	0.114286	0.228571
PB306	468	0.307692	0.25641	0.128205	0.128205	0.025641	0.153846
PB306	470	0.32	0.12	0.12	0.28	0.12	0.04
PB306	474	0.444444	0.0833333	0.0555556	0.166667	0.111111	0.138889
PB306	475	0.3125	0.1875	0.09375	0.15625	0.125	0.125
PB306	476	0.333333	0.181818	0.0606061	0.181818	0.0606061	0.181818
PB306	477	0.333333	0.133333	0.0333333	0.2	0.0666667	0.233333
PB306	480	0.275	0.125	0.125	0.15	0.125	0.2
PB306	482	0.285714	0.214286	0.0714286	0.178571	0.142857	0.107143
PB306	483	0.4	0.142857	0.0571429	0.171429	0.0857143	0.142857
PB306	486	0.405405	0.108108	0.0810811	0.216216	0.0810811	0.108108
PB306	488	0.38	0.08	0.08	0.3	0.06	0.1
PB306	489	0.357143	0.0714286	0.047619	0.238095	0.0952381	0.190476
PB306	490	0.35	0.125	0.05	0.15	0.2	0.125
PB306	495	0.483871	0.193548	0.0645161	0.0967742	0.0645161	0.0967742
PB306	498	0.419355	0.129032	0.0967742	0.258065	0.0322581	0.0645161
wild	ECA1074	0.359194	0.235264	0.0549118	0.12796	0.0755668	0.147103
wild	ECA1205	0.328367	0.247983	0.0574178	0.117629	0.0822471	0.166356
wild	ECA1216	0.329284	0.22922	0.0648977	0.123402	0.0882353	0.164962
wild	ECA1223	0.337145	0.238959	0.0630915	0.126577	0.0871451	0.147082
wild	ECA1225	0.358183	0.232466	0.0621967	0.104985	0.0816056	0.160565
wild	ECA1237	0.337134	0.228888	0.0697405	0.128904	0.0849446	0.150388
wild	ECA1238	0.317073	0.292683	0.0609756	0.0853659	0.0853659	0.158537
wild	ECA1239	0.311475	0.278689	0.0819672	0.0819672	0.0983607	0.147541
wild	ECA1241	0.335253	0.257921	0.0558756	0.12356	0.0849654	0.142425
wild	ECA1257	0.371968	0.232191	0.0558337	0.130535	0.0762418	0.133231
wild	ECA1260	0.346432	0.255327	0.0553275	0.130401	0.0733138	0.139198
wild	ECA1263	0.490196	0.196078	0.0196078	0.0980392	0.117647	0.0784314
wild	ECA1267	0.340426	0.212766	0.148936	0.0957447	0.0425532	0.159574
wild	ECA1268	0.316456	0.227848	0.0632911	0.164557	0.0632911	0.164557
wild	ECA1269	0.346667	0.24	0.08	0.0666667	0.146667	0.12
wild	ECA1276	0.245614	0.140351	0.105263	0.140351	0.192982	0.175439
wild	ECA1277	0.234043	0.255319	0.0638298	0.212766	0.0638298	0.170213
wild	ECA1281	0.284091	0.238636	0.0454545	0.147727	0.113636	0.170455
wild	ECA1285	0.335385	0.253538	0.0661538	0.124308	0.0732308	0.147385
wild	ECA1293	0.336725	0.237283	0.0722022	0.11979	0.0807351	0.153266
wild	ECA1298	0.329169	0.251857	0.0577313	0.127616	0.0857529	0.147873
wild	ECA1413	0.343515	0.236604	0.0613513	0.135387	0.0755889	0.147554
wild	ECA724	0.270833	0.145833	0.0833333	0.145833	0.166667	0.1875
wild	ECA725	0.265625	0.3125	0.046875	0.0625	0.078125	0.234375
wild	ECA726	0.262295	0.245902	0.0163934	0.180328	0.0819672	0.213115
wild	ECA762	0.283784	0.256757	0.0405405	0.148649	0.0810811	0.189189
wild	ECA812	0.383562	0.205479	0.0684932	0.123288	0.0410959	0.178082
wild	JU3401	0.354707	0.231282	0.0648629	0.118977	0.0848777	0.145293
wild	NIC1788	0.396154	0.2	0.0730769	0.115385	0.0807692	0.134615
wild	NIC1794	0.325606	0.243414	0.0658588	0.135406	0.0922023	0.137513
wild	NIC1797	0.253333	0.273333	0.04	0.126667	0.133333	0.173333
wild	NIC1798	0.253165	0.194093	0.0843882	0.122363	0.130802	0.21519
wild	NIC1805	0.371585	0.229508	0.0655738	0.125683	0.0655738	0.142077
wild	NIC1811	0.452381	0.190476	0.0714286	0.0714286	0.047619	0.166667
wild	TWN2542	0.407407	0.296296	0.148148	0	0.111111	0.037037
wild	TWN2794	0.321429	0.321429	0	0.0714286	0.142857	0.142857
wild	TWN2803	0.181818	0.181818	0.0909091	0.0909091	0.0909091	0.363636
wild	WN2071	0.352011	0.222701	0.066092	0.128592	0.0833333	0.14727

## Sheet: Readme
The three preceding worksheets show the list of lines and the details of sequencing of the "Comparison Subset" in whole genome, mononucleotide and non-mononucleotide regions of the genome, respectively. The details of "Comparison Subset" or the subset of lines from all lines is presented in supplemental methods, section 13.
